# Supplementary material for: Epigenetic mapping of the Arabidopsis metabolome reveals mediators of the epigenotype-phenotype map
Source: Genome Res. 2019 Jan;29(1):96–106. doi: 10.1101/gr.232371.117 (PMC6314165; doi:10.1101/gr.232371.117)
Supplement: Supplemental Material [file supp_gr.232371.117_Supplemental_Tables.xlsx]

## Sheet: Supplemental table 1
Supplemental table 1. Batch corrected metabolite intensity values for all epiRILs and the parents of the population, Col-0 and ddm1-2, detected in the leaves. The mz indicated in column C is the most unique mass feature of the mass peak cluster as selected by the MSClust software. Metabolite identification level according to Metabolomics Society Initiative (MSI; Summer et al., 2007); 1, Identifie…
Metabolite nr	Retention time (min)	selected mass feature (mz)	Putative Metabolite ID	MSI level	Col-0	Ddm-1	8	11	24	36	46	52	53	54	55	62	64	69	70	71	92	94	95	99	101	108	112	114	118	122	137	144	150	159	164	166	169	170	183	193	202	208	216	218	222	229	232	238	252
2	1.8676	530.86			1.10165	0.887453	0.922557	0.902682	1.09349	1.0575	0.930886	1.17931	1.0703	0.979719	0.773995	1.10585	0.97489	1.07573	1.09358	1.13251	1.02448	0.977169	1.00552	1.02317	1.00251	1.11054	1.05427	0.929582	0.864202	0.904295	1.029	0.979781	0.935171	1.03497	1.11966	0.989745	1.08066	0.978064	0.915646	0.903447	0.732961	1.12981	0.926241	0.986176	0.815608	1.05733	1.10651	0.977475	1.21392
30	1.93903	390.934			0.97947	0.867109	1.06381	0.993453	1.02003	1.00903	1.14424	1.0776	1.03478	0.916872	1.02727	1.01426	0.878216	0.932016	1.05054	1.0403	1.08939	0.876947	0.923676	0.917795	1.00599	1.00322	1.0104	0.949216	0.820642	1.02206	1.04926	1.08983	0.995205	1.02807	1.05045	0.986579	0.961984	0.866726	0.989994	0.972869	0.834697	1.0501	1.09368	1.05581	0.910657	1.11984	1.0607	0.908312	1.13917
40	1.93903	534.874			1.14145	0.763317	0.927785	0.835251	1.0825	1.09913	0.950121	1.29258	1.09657	0.973907	0.756665	1.07951	0.929927	1.09161	1.11952	1.10729	1.05352	0.970161	0.978955	1.01004	1.08155	1.14908	1.07338	0.90077	0.823991	0.787051	1.07281	0.965601	0.907943	1.01996	1.09751	1.03705	1.07981	0.957984	0.872447	0.812244	0.714903	1.10455	0.95361	0.974346	0.775792	1.03499	1.16564	0.931404	1.29306
77	2.0481	702.802			1.12225	0.75645	0.939506	0.846283	1.06899	1.0958	0.969657	1.31593	1.09656	1.00232	0.745358	1.06493	0.844797	1.04706	1.05885	1.11754	1.08533	0.98257	0.981537	0.983592	1.07008	1.12225	1.0755	0.88698	0.748799	0.833127	1.05461	0.899602	0.877501	1.08472	1.10444	1.06977	1.0788	0.936026	0.903248	0.788416	0.744499	1.15047	0.96775	0.986191	0.76873	1.05731	1.18126	0.94229	1.33273
102	2.10167	554.863			0.937356	0.986707	0.940753	1.06823	1.01764	1.02378	1.11693	1.07628	0.946065	0.937333	0.89975	1.03719	0.884421	0.947577	1.18273	1.00314	1.02518	0.936265	0.976478	0.960417	1.03818	1.04472	1.0447	1.00487	0.80704	1.09397	1.08596	1.0236	0.944702	1.05665	1.06107	1.00871	1.05162	1.01033	0.985323	0.904901	0.813028	1.15745	1.01008	1.00113	0.835271	1.03519	0.989977	0.917916	1.15027
110	2.11953	374.898			1.05706	0.851866	0.914196	0.971529	1.07491	1.05024	0.957093	1.27349	1.04025	0.993749	0.697457	1.04318	0.874109	1.01395	1.05374	1.14437	1.10186	0.993138	0.949371	0.990353	1.07439	1.13612	1.06867	0.959437	0.764863	0.943302	1.10589	0.92291	0.886322	1.09326	1.08202	1.05111	1.06492	1.03195	0.909222	0.777668	0.73989	1.15206	0.934192	0.978036	0.744066	1.03085	1.09931	0.948782	1.2843
143	2.17312	228.967			0.900073	0.971787	0.950428	1.08129	1.03594	1.01997	1.15184	1.05287	0.94981	0.920283	0.901803	1.07513	0.925214	0.937005	1.24736	0.988301	0.987905	0.935414	0.970374	0.974451	1.03836	0.988425	1.03855	0.993145	0.809531	1.08197	1.0853	1.00607	0.923795	1.06738	1.10261	0.989472	1.01901	1.02695	1.02734	0.91349	0.820227	1.14705	0.999323	0.980666	0.8275	1.03007	0.977111	0.905017	1.13926
176	2.22858	594.781			0.992563	0.918759	0.933689	1.05843	1.09327	1.01012	0.939031	1.17809	0.987171	0.980239	0.701469	1.09218	0.941505	0.991978	1.06772	1.15118	1.04696	1.0413	1.00119	0.990179	1.05564	1.16704	1.05748	1.02243	0.806406	1.05446	1.10414	0.941136	0.888646	1.08272	1.07352	0.98155	1.06061	1.04883	0.859471	0.843782	0.728221	1.09948	0.947363	0.977389	0.760528	1.03575	1.03327	0.964006	1.21966
226	2.30003	344.879			0.99524	0.848543	1.01067	1.03751	1.11411	0.955618	0.923823	1.10888	1.01213	1.02642	0.699368	1.11152	0.979015	0.975976	1.07954	1.13292	1.01973	1.03179	1.00551	0.9481	1.02711	1.10658	1.04439	0.986884	0.765116	1.12119	1.05081	1.03652	0.932223	1.10016	1.09628	0.935904	1.02262	0.917493	0.870445	0.919095	0.724341	1.1277	0.981539	1.00116	0.757071	1.05958	1.06877	0.965752	1.20104
241	2.33575	364.871			0.983689	0.621847	1.16203	1.02401	0.970286	0.921403	1.01113	1.0029	1.09722	1.05715	0.851	1.03405	1.41625	0.997718	1.38568	0.892376	0.94421	0.916519	0.924837	0.922738	0.994483	0.938539	1.0569	0.802134	0.921409	1.00033	0.972625	1.22561	1.02166	1.11777	1.06035	0.734061	0.975586	0.732802	0.911469	1.01797	0.827271	1.08533	0.991324	1.07775	0.856485	0.961817	1.1809	0.913937	1.27049
301	2.4448	213.049			0.965724	0.729601	1.07291	0.987175	0.926684	0.973313	0.945157	1.01893	1.04349	1.04167	0.795255	1.07965	1.1313	1.01368	1.3436	1.00294	0.997858	0.986071	0.960166	0.967182	0.990025	0.975325	1.03054	0.861064	0.943648	0.950783	0.966378	1.13058	0.978018	1.16332	1.02712	0.804199	1.02729	0.842388	0.913162	0.993929	0.80875	1.15266	0.961965	1.03836	0.816464	0.957209	1.14665	0.946666	1.23142
303	2.4448	229.023			0.914982	1.21478	0.843649	1.13911	1.01144	1.03528	0.925895	1.19421	0.94573	0.925213	0.699855	1.11299	0.890748	0.933202	1.04675	1.02457	1.0979	1.03601	1.02034	0.97212	1.06286	1.12809	1.09452	1.09172	0.785956	1.17624	1.21069	0.946923	0.893078	1.15149	1.0818	1.04251	1.00797	1.06813	0.851124	0.752161	0.720106	1.16561	0.816025	0.961178	0.816938	1.13882	1.05906	1.08181	1.14599
316	2.49838	298.115			1.17605	1.49063	1.47619	1.18309	1.63518	0.607758	1.68195	0.662573	0.94393	0.622561	1.43377	0.957392	0.792112	0.884338	1.0033	0.678108	0.665119	0.615828	0.744348	0.631106	0.927739	1.56179	0.728653	0.679576	0.513848	1.11332	1.68605	1.24421	1.31511	0.946027	1.3193	2.30486	1.2596	0.763987	1.90309	0.829571	1.48534	0.754594	1.96465	0.602332	0.889024	1.05281	1.03422	1.69429	0.696892
318	2.49838	315.074			1.00328	0.889097	0.942653	0.910789	1.05061	1.03439	0.829776	1.24266	1.05936	1.1391	0.711913	1.20006	0.993189	1.02948	1.0996	1.04049	0.946035	1.07428	1.09172	1.07213	0.969074	0.716474	0.93254	0.901762	0.911593	0.800922	0.966505	1.09288	0.937753	1.16032	1.09012	0.824087	0.986214	0.793608	0.822931	0.870611	0.728089	1.18613	0.807592	1.03135	0.819581	1.14926	1.19312	1.02291	1.29523
326	2.51623	392.954			0.932089	1.05974	0.822291	1.08279	1.00071	0.993567	0.744418	1.12646	1.00757	1.04824	0.72032	1.17086	0.995275	0.955999	1.06109	1.11255	1.05153	1.05997	1.07595	1.00385	1.13484	0.747899	1.11846	1.03441	0.881396	1.19053	1.18828	1.05361	0.950775	1.16364	1.10673	0.762557	0.998414	0.961862	0.747823	0.832113	0.624591	1.21917	0.675216	1.02869	0.861553	1.17355	1.20256	0.870893	1.19656
343	2.60743	416.148			0.830037	0.726229	3.43044	0.596959	1.57343	0.534577	3.16733	0.568206	0.541291	0.514334	1.7777	0.660233	0.728612	0.492212	0.628776	0.634493	0.625543	0.673892	0.595394	0.45663	0.477388	0.93717	0.503222	0.504981	0.564618	0.543902	0.631826	1.37502	1.20016	0.70247	0.863256	2.83321	0.944241	0.479237	2.53309	0.578996	2.81909	0.697169	4.67738	0.492316	0.561826	0.688461	0.625198	2.60973	0.555712
391	2.66102	868.234			0.892071	0.482221	0.342036	0.992946	0.501343	1.24004	0.357504	1.49875	1.23393	1.39033	0.541994	1.46041	1.31183	1.15887	1.26131	1.3527	0.879527	1.27528	1.30801	1.19362	1.0431	0.40336	1.14583	0.918742	1.01796	1.2435	0.71849	0.665786	0.633515	1.25448	0.864476	0.298133	1.01099	0.737809	0.329296	0.946114	0.339728	1.36761	0.350344	1.34526	0.773803	1.3952	1.06215	0.358296	1.7595
416	2.7146	708.109			0.964078	0.890802	0.799109	1.06124	0.879027	1.02751	0.854784	1.10119	1.05219	1.12195	0.606677	1.23207	0.861833	1.04116	1.18973	1.13492	1.23767	1.06574	1.04932	0.898511	1.05314	1.16587	1.16225	1.03008	0.820486	1.10531	0.895662	1.08778	0.935453	1.08228	1.01012	0.683557	1.07564	0.876564	0.688493	0.963257	0.597504	1.29212	0.723618	1.08547	0.799043	1.11404	1.18977	0.783005	1.28416
418	2.77007	855.217			0.931137	0.388214	0.37173	1.15478	0.434033	1.23878	0.40467	1.58026	1.32675	1.41532	0.555387	1.51042	1.12975	1.27495	1.22568	1.45119	0.909068	1.28494	1.33981	1.14779	1.06333	0.406133	1.20676	0.821363	1.05567	1.23729	0.78158	0.698988	0.745807	1.20619	0.769566	0.315637	0.954095	0.608954	0.359857	0.932837	0.389671	1.36893	0.403241	1.41859	0.788539	1.48075	1.08004	0.417905	1.86728
438	2.8058	356.999			1.04046	0.956526	1.09074	0.970118	0.912058	0.961587	0.896157	1.04635	1.04768	1.01672	0.598911	1.17227	0.828793	0.9441	1.20196	1.17422	1.24614	1.04591	1.05575	0.989058	0.993333	0.950292	1.06424	1.00526	0.898217	0.985103	0.956672	1.13885	0.978316	1.02466	1.00102	0.9469	1.08848	1.11671	0.685647	0.922591	0.634315	1.35151	0.911946	0.973855	0.75251	1.13194	0.968957	1.0008	1.0621
481	2.85937	587.158			0.825163	0.538367	0.372735	1.3479	0.758231	1.42451	0.598775	1.77558	0.986065	1.07487	0.687552	1.23573	1.03794	1.06715	1.15634	1.18665	0.951469	1.14931	1.07214	1.35555	1.10312	0.603025	1.3769	1.1922	0.871558	1.46582	1.19317	0.620406	0.668858	1.16369	0.92538	0.309408	1.08354	0.858134	0.605404	0.616449	0.569554	1.22656	0.403243	1.21363	0.944966	1.2727	0.753558	0.515479	1.39961
511	3.022	615.121			0.836478	1.23359	0.788752	1.30206	1.08313	1.35209	1.14026	1.14734	0.867254	1.26836	0.883166	1.16847	0.985304	0.91428	1.25804	1.10613	0.885447	0.993593	1.12721	1.11677	1.02897	1.03734	1.12582	1.00048	0.736312	1.24009	1.22331	0.92402	0.846246	1.10324	0.991429	0.878522	1.08107	0.996188	0.932534	0.775942	0.817006	1.07112	0.874878	1.06345	0.807727	1.26778	1.00542	0.815886	1.18197
524	3.03987	792.135			0.657501	0.86596	0.653979	0.964832	0.7989	0.871023	0.754602	0.746977	0.659661	0.723214	0.683126	0.82555	0.725133	0.665155	0.871336	0.92024	0.86636	0.829521	0.787674	1.07479	1.02595	0.968746	0.776084	2.52083	0.680461	1.22824	0.856982	0.683074	0.70788	0.891196	0.788402	0.796425	0.834459	1.48122	0.690744	0.668121	0.652438	0.774395	0.650015	0.696548	0.756136	0.837609	0.750242	0.977577	0.7186
526	3.05773	262.057			1.11252	0.455188	0.935223	1.11737	1.0617	1.01353	0.990739	1.32324	1.25669	1.33931	0.973717	1.17252	1.34286	1.14299	1.09083	1.00647	0.797455	1.00059	1.14915	1.01203	1.12476	0.637001	1.04198	0.593888	0.84379	1.25381	1.03593	1.09554	1.085	1.11241	1.10602	0.582699	1.18374	0.456888	0.854301	1.01484	0.801073	0.966859	0.933968	1.20006	0.805773	1.29278	1.33263	0.77228	1.61705
548	3.1132	173.01			1.00058	1.38451	0.814162	1.21834	0.972009	1.25557	0.869881	0.994313	0.923647	1.0555	0.737755	1.17702	1.06893	0.834775	1.26206	1.20336	0.98316	1.05991	1.08812	1.05747	1.02545	1.06741	1.12725	1.05215	0.801995	1.1326	1.26993	1.08843	0.935739	1.11047	1.01181	1.02467	1.10759	1.11318	0.760382	0.752429	0.69818	1.07532	0.829269	0.882403	0.79545	1.31303	0.978849	0.91895	0.978548
551	3.1132	346.055			1.71912	0.595832	1.30204	0.722181	1.5549	0.716049	0.806779	0.70578	1.22422	0.892289	1.55741	0.939946	1.59578	0.774382	1.0215	0.799345	0.597816	0.858314	0.964577	0.691681	1.3291	0.721855	0.799367	0.506369	0.720099	0.822206	2.11404	2.92545	1.88297	0.893215	1.77098	0.616036	2.06992	0.44778	0.927019	1.37167	0.956613	0.906507	0.77139	0.735807	0.795181	1.00811	1.21697	0.975175	0.952967
591	3.34728	158.926			0.958397	0.913914	0.897657	0.95954	1.10525	1.07902	1.17386	1.05639	1.12706	1.1134	0.734608	1.26289	1.32766	0.851655	1.21649	1.08511	0.78901	0.871802	1.05106	1.03641	1.05521	0.896166	1.00081	0.95035	0.951376	1.21339	0.992138	1.25955	0.928911	0.822117	1.01656	0.938642	0.956222	0.941348	1.04776	0.947373	0.766801	1.32159	0.908322	1.01227	0.744767	1.07972	0.910347	0.911914	1.10047
595	3.34728	333.058			1.06114	0.60691	1.00238	0.855373	0.883011	0.959446	0.677114	1.15545	1.31331	1.36059	0.713711	1.28914	1.27298	0.791005	1.09202	1.28221	0.739018	1.1077	1.04836	1.01109	1.09441	0.611777	0.982183	0.785389	0.924066	0.906003	1.11274	1.29953	1.03851	1.21375	1.12908	0.615177	0.95439	0.753991	0.625627	1.11988	0.533689	1.41412	0.737217	1.28862	0.869799	1.25697	1.13137	0.815711	1.42795
611	3.41872	454.977			0.807986	0.957831	0.863175	1.05477	1.08732	1.18347	0.775838	0.961886	0.897286	0.847585	0.659115	1.43529	1.50039	0.954227	1.14926	1.20366	0.759836	0.895135	1.08032	1.1022	0.996795	0.732957	1.20587	1.11712	1.10933	1.02765	0.962124	0.935389	0.784513	0.908043	1.12841	0.919856	1.00541	1.03769	0.808799	1.00908	0.580119	1.42592	0.961723	1.03362	0.79167	1.19528	1.10511	0.849601	1.06354
621	3.70827	422.028			0.387039	0.316038	0.123093	1.84623	0.522437	2.12915	0.397453	1.6573	0.966156	0.808924	0.174755	1.43015	0.327235	0.992957	1.08551	1.38657	1.01449	1.44069	1.14885	1.62781	1.23897	0.352674	1.82629	1.06597	0.878163	1.85489	0.501396	0.589756	0.455499	1.55631	0.885322	0.222243	0.96686	1.11556	0.251954	0.478847	0.192798	1.73163	0.106481	1.0241	1.12784	1.55165	0.413238	0.3228	1.16992
627	3.79757	373.047			0.348356	0.535147	0.25023	1.42397	0.75478	1.37937	0.538544	1.16229	0.946326	1.20807	0.417245	1.11854	0.570382	0.87459	0.923283	0.946743	0.933852	0.996651	0.997564	1.62228	1.15253	0.873341	1.31485	1.06483	0.780732	1.65736	0.414144	1.20051	0.572742	0.897997	0.91868	0.323534	0.886863	1.75123	0.457348	0.795969	0.425373	1.00818	0.230804	0.800436	0.773278	1.20057	0.786772	0.465838	0.917258
646	3.88877	173.009			0.930229	0.912365	1.18891	0.855272	1.1657	1.00398	0.990441	1.03786	0.890194	0.943083	0.596429	0.943613	1.0325	0.863543	1.11069	1.03381	1.07837	1.01918	0.930474	1.02791	1.03969	1.40316	1.11477	0.841836	0.628867	1.30646	0.748981	1.53288	1.03629	1.12839	1.14378	0.757136	1.27467	1.09124	0.888719	1.24012	0.674502	1.19211	0.846164	0.932007	0.736043	0.928323	1.25484	0.91442	1.2014
655	3.97805	521.018			0.809415	0.394765	0.680734	0.983164	0.927872	1.12401	0.420205	1.56115	1.19258	1.24804	0.329217	1.11901	1.17053	1.18009	0.970277	1.1903	1.14091	1.16367	1.15816	1.30649	1.0837	0.784582	1.25011	0.863418	0.645753	0.87795	0.448477	1.21659	0.752343	1.24928	1.19141	0.2461	1.06594	1.04098	0.338848	1.07077	0.343469	1.46838	0.231659	1.16013	0.631657	1.21207	1.23538	0.417887	1.65902
662	4.08712	535.037			0.781982	2.3738	0.556616	1.52918	0.707147	0.998557	0.824555	1.0264	0.938653	0.990607	0.74959	1.12648	0.901521	0.670333	1.04642	1.02526	1.3123	1.07155	1.43507	0.626211	1.22507	1.37815	0.809009	0.969035	0.603843	1.50458	1.17278	1.35808	0.602649	1.12935	1.07411	1.05499	0.883256	2.02483	0.652753	0.387542	0.590434	0.983421	0.852361	0.958986	0.847631	1.17464	0.742053	0.734263	0.748958
675	4.4481	423.029			0.419609	0.46689	0.271792	1.40322	0.681899	1.22634	0.318755	1.40717	1.06401	0.938668	0.272476	1.34313	0.991591	1.16393	1.16013	0.982317	0.940567	1.17869	1.20853	1.50552	1.09654	0.52743	1.32356	1.2646	0.782828	1.39275	0.367473	0.741305	0.586934	1.25969	1.08381	0.291569	0.853002	1.25405	0.273249	1.1654	0.257417	1.67056	0.228694	1.0388	0.86828	1.21936	0.650549	0.395101	1.23444
694	4.68218	437.046			0.463438	0.476515	0.219291	1.37521	0.73786	1.23504	0.363878	1.48882	1.01142	1.04629	0.225383	1.22319	1.14761	1.09967	1.22926	1.10392	1.10243	1.06083	1.22442	1.43778	1.189	0.733579	1.39718	1.06507	0.758109	1.50894	0.386173	0.814699	0.645271	1.17649	1.15978	0.226576	0.929509	1.35801	0.243496	1.01425	0.200222	1.36444	0.149814	0.991535	0.736107	1.20296	0.721159	0.364198	1.41436
711	4.82695	450.057			0.466395	0.476638	0.263271	1.84913	0.6006	1.22283	0.355315	1.4481	1.19925	1.14546	0.311263	1.37572	1.06728	1.16894	1.1279	1.05614	1.30567	1.15743	0.924277	1.25464	1.13378	0.725438	1.48124	0.883533	0.523379	1.73848	0.453822	0.963196	0.662251	1.22205	1.20125	0.295529	0.667654	1.45462	0.259208	0.698182	0.262594	1.39387	0.256281	1.21995	0.655903	1.6479	0.952369	0.493041	1.49819
734	6.4514	451.061			0.432551	0.57982	0.140506	1.73316	0.68788	1.31417	0.292261	1.34787	0.964419	0.985849	0.159259	1.27754	0.918152	1.15697	1.14094	1.13332	1.1463	1.16397	1.31879	1.56601	1.23957	0.548931	1.50512	1.16458	0.850809	2.29376	0.476181	0.680503	0.680682	1.2073	1.03111	0.133579	0.842644	1.47131	0.151729	0.835241	0.121663	1.34064	0.0713146	1.02665	0.647643	1.46191	0.76325	0.189165	1.22909
741	6.93932	565.046			1.04371	1.06342	0.592304	1.0048	0.972926	1.01486	0.67927	1.37622	1.02667	0.966957	0.714198	1.06344	0.828	0.883376	1.1126	1.13751	1.16877	1.04805	1.11133	1.05637	1.27803	1.2127	1.1295	1.09618	0.774383	1.09555	1.4134	0.909013	0.994384	1.16684	1.04266	0.698041	1.12943	1.11349	0.712148	0.822347	0.579154	1.14044	0.544212	1.09556	0.723469	1.13025	0.94518	0.62336	1.34579
757	10.2954	465.075			0.443085	0.528901	0.328564	1.73963	0.83875	1.69225	0.411303	1.44963	0.913738	0.926063	0.370135	1.34031	0.8051	1.31301	1.02065	0.81033	1.13102	1.16102	1.09079	1.50129	1.07044	0.794716	1.40422	1.03494	0.61905	1.46905	0.38975	0.626577	0.482947	1.58512	0.975308	0.341603	0.898938	1.52047	0.382967	0.591328	0.351867	1.18152	0.330104	0.871909	0.696113	1.00707	0.56593	0.510887	1.59107
762	12.4435	323.135			0.96108	1.20842	0.709389	1.13829	1.01407	1.02371	1.07444	1.24441	0.910309	0.842533	0.735287	0.990582	0.795491	0.880965	0.966736	0.980058	1.14895	1.01847	1.03634	1.08628	1.1231	1.40071	1.17205	1.11877	0.813004	1.21039	1.39456	0.913083	0.913176	1.04741	1.01355	1.08224	1.10381	1.38401	0.882975	0.70058	0.670186	1.09474	0.93991	0.827684	0.703073	1.00023	0.807686	0.953448	1.07223
767	13.455	285.062	dihydroxybenzoic acid xyloside III	3	0.810144	1.98659	0.75203	1.58018	0.9613	1.3305	1.09567	0.808561	0.807471	0.981458	0.829457	1.02467	0.675989	1.00108	1.06308	1.10071	1.097	1.07136	1.01472	1.19156	1.22972	1.0356	1.15756	1.2991	0.563644	1.64576	1.14888	0.660788	0.922021	0.956899	0.741539	1.0512	0.897461	1.11075	0.815585	0.899062	0.690122	1.04056	0.798344	0.792326	0.73848	1.42469	1.28272	0.614254	0.889559
773	14.0143	137.026			0.589945	2.3095	0.314297	3.83062	0.757856	1.13632	0.84035	0.818985	0.867077	1.10697	0.923128	1.24059	0.637308	0.915907	1.14434	1.02723	0.908755	1.2206	0.913925	1.36033	1.34583	1.31096	0.982918	0.955066	0.288381	1.93302	1.68596	0.503034	0.581768	1.11843	0.343264	0.909791	0.954886	0.902181	0.690341	0.665512	0.510873	0.788104	0.515319	0.658397	0.762633	1.89996	1.37459	0.583451	0.794186
779	15.4404	285.062			0.840149	2.53525	0.32669	2.2041	1.17597	1.3023	0.938289	0.750199	0.815143	0.892081	1.04987	1.19366	0.500302	1.0484	0.940397	0.960437	1.12767	1.08255	1.07436	1.34133	1.19324	1.17216	1.06146	1.3966	0.195612	1.94703	1.2236	0.505384	0.665451	1.28145	0.285766	1.16055	1.13476	0.946768	0.786098	0.839334	0.704686	0.631335	0.611925	0.738187	0.853846	1.64485	1.48307	0.608371	0.872145
782	15.5852	478.088			0.359282	0.691871	0.205126	1.53412	0.826425	1.47654	0.349801	1.42824	0.924224	1.00322	0.222081	1.34827	0.880719	1.19649	1.05896	1.0676	1.15065	1.24823	1.22111	1.66081	1.10357	0.724368	1.37695	1.51507	0.8102	1.25688	0.354876	0.517321	0.499433	1.36439	1.02343	0.227859	0.790993	1.73791	0.223066	0.632305	0.191283	1.37569	0.142541	0.851072	0.882116	0.886229	0.613918	0.319661	1.39313
788	16.3072	223.063			0.747843	1.67632	0.553922	1.23641	1.09688	0.94712	0.956278	0.83593	0.757419	0.717967	0.669821	1.0327	0.515828	0.778099	0.951871	1.1696	1.19237	0.976486	1.30379	1.02466	1.02444	1.52094	0.842182	0.995757	0.567506	10.2563	1.03725	0.638181	0.521369	1.1215	0.794625	0.736348	1.11182	0.931797	0.837884	0.458063	0.531592	1.06074	0.771074	0.627456	0.546161	1.24217	0.84231	0.869019	0.880232
801	18.6536	879.061			0.511518	0.421899	0.354312	0.66558	0.382818	1.20284	0.294646	0.836517	0.933268	1.66054	0.254565	1.27914	0.375617	1.15673	1.05781	1.93849	1.64184	1.76924	1.7067	1.16579	1.33087	0.463287	1.91369	1.36995	0.888077	1.73466	0.479313	0.575786	0.624447	1.25104	0.45706	0.340669	0.541468	1.09997	0.295522	1.34244	0.232653	1.61135	0.32968	2.1351	0.638848	1.4629	0.633714	0.254559	0.876456
813	18.852	385.114			0.715026	1.56387	0.376724	1.83644	0.84045	1.21552	0.261562	1.45067	0.764097	0.845808	0.496871	1.2725	0.671346	0.95658	1.13774	1.30505	1.09935	0.926247	1.28696	1.15183	1.22267	1.27575	1.03814	1.03201	0.887296	1.06958	1.69384	0.674796	0.768809	1.19024	1.08596	0.248246	1.33931	1.42338	0.422276	0.693921	0.316986	1.45143	0.248783	0.980372	0.72664	1.26107	0.77625	0.393582	1.112
823	19.2308	610.15			0.876206	1.25516	0.750126	2.1597	0.901438	1.06128	0.906707	1.1258	0.85893	1.0282	0.87758	1.17186	0.965438	1.07358	0.877681	0.999633	0.975736	1.04744	0.918927	0.953724	1.02484	1.33972	1.064	1.00719	0.798054	0.883431	1.04802	0.860818	0.867028	1.47518	0.801412	0.852512	1.29442	1.10809	0.892622	0.777421	0.835187	0.956908	0.897655	0.910215	0.826314	1.18986	0.827668	1.02999	1.02981
832	19.3756	846.2			0.950101	1.07889	0.882704	1.69799	0.950965	1.04816	0.904812	1.08801	0.898176	0.901513	0.896807	1.07842	1.02288	1.00947	0.872895	1.02075	0.975042	1.02906	0.984717	1.04741	1.06185	1.02841	1.04889	0.994076	0.875579	0.944179	0.977356	0.95768	0.914903	1.21922	0.967455	0.816602	1.08446	1.13145	0.929618	0.863944	0.961165	1.05332	0.924854	0.988572	0.916736	1.0554	0.826673	1.00054	0.999647
838	19.8992	385.12			0.73848	1.51754	0.570457	1.46025	0.870259	1.09829	0.549356	1.3282	0.625689	0.845848	0.537591	1.22876	0.426312	0.868477	1.14987	1.42767	1.16223	0.898257	1.38308	1.0395	1.15341	1.3143	1.0119	1.00697	0.849664	3.35176	1.64614	0.670733	0.708776	0.920484	1.03004	0.434877	1.18522	1.19886	0.609397	0.627122	0.464718	1.39074	0.560255	0.880064	0.665384	1.37862	0.850684	0.669424	1.11641
842	20.0421	432.196			0.883083	1.34711	0.832575	1.1374	1.04569	1.15191	1.03367	1.07034	0.826491	0.848483	0.591854	0.997494	0.675698	0.903256	1.02448	1.19691	1.23114	1.03808	0.96683	1.08831	1.13918	1.51015	1.09324	1.07083	0.776147	1.13961	2.17537	0.886723	0.83339	1.03594	0.963664	0.997853	1.04434	1.23473	0.715879	0.7699	0.647602	1.20488	0.991406	0.865102	0.643287	1.09508	0.965421	0.86612	1.12106
846	20.2602	172.099			0.919282	1.1745	0.785261	1.06236	1.05403	0.974334	1.12595	1.23493	0.891641	0.788139	0.631483	1.05859	0.752779	0.886898	0.913049	0.942292	0.953356	1.00083	0.986247	1.1409	1.0835	1.46355	1.18121	1.0282	0.862513	0.910271	1.72412	0.945209	0.762805	1.14846	1.14985	1.12561	1.1339	1.63197	0.893163	0.603215	0.74607	1.13727	0.733101	0.71398	0.811899	1.1464	0.765063	1.06376	1.02873
847	20.6212	322.093			0.934659	1.60715	0.605433	1.32377	1.02074	1.12936	1.04414	1.04329	0.913996	0.81114	0.722362	1.02749	0.729347	1.02608	1.04285	0.965792	0.943788	1.01166	0.770903	1.05971	1.21777	1.27721	1.41245	1.12398	0.427124	1.1321	1.48681	0.858921	0.85934	1.07208	0.71712	1.23153	0.954032	0.885499	0.771144	0.842398	0.45394	0.912702	0.796959	0.712136	0.772193	1.39188	1.13996	0.719666	0.973487
850	20.7105	552.18			1.12708	1.09119	0.477909	1.00868	0.76239	1.03956	0.630613	1.70242	1.04435	1.2722	0.581002	1.17116	0.397369	1.00465	1.07761	1.59148	1.20642	1.44217	1.05283	0.860097	0.995698	1.27297	1.16959	0.53568	0.713698	0.731966	1.6637	0.970267	0.847935	1.06425	0.823958	0.502466	1.01091	0.697424	0.518252	1.0962	0.336604	1.21227	0.472068	1.45112	0.773826	1.35819	1.34839	0.890238	1.25657
854	20.8553	962.146			0.405195	2.27315	0.446145	4.04272	0.8725	1.53712	0.918776	0.41537	0.420778	0.427483	0.920512	0.839616	0.885754	0.42319	0.846885	0.855496	0.893634	0.832212	0.870485	0.377386	1.89202	0.826125	0.73544	2.54266	0.817655	1.89351	1.0668	0.403412	0.428331	0.880856	0.893227	0.579279	0.802337	2.16023	0.82296	0.423048	0.846764	0.867359	0.413983	0.398568	0.890035	0.892377	0.429618	0.580708	0.436332
856	20.8731	807.195			1.46192	0.672019	1.84762	0.65788	1.14293	0.561952	1.46025	1.20077	0.994074	1.53583	1.03286	0.905939	1.0449	0.900878	0.977066	1.11058	0.886839	0.807974	0.795743	0.541714	0.721557	1.2378	0.689502	0.370996	0.839482	0.46033	1.2149	1.55145	1.1636	1.08864	0.90751	1.1883	1.20043	0.347402	1.2172	0.726604	1.10153	1.09118	2.26579	0.818189	0.664749	1.07851	1.45237	1.57473	1.6608
868	20.9446	741.208			1.25214	1.0202	1.39522	0.982157	1.038	0.696302	1.43247	1.33184	0.957112	1.42944	1.02135	0.97891	0.921093	0.912551	0.887843	1.05857	1.0007	0.886505	0.827465	0.587938	0.844721	1.39663	0.844964	0.485821	0.766469	0.54081	1.2461	1.37711	1.12704	1.18782	0.853625	1.23733	1.23361	0.484196	1.18628	0.720271	1.06769	1.08959	2.0334	0.849366	0.73631	1.1639	1.21585	1.58265	1.55732
889	21.0893	837.174			0.471016	1.29655	0.148747	2.07551	0.804921	1.49849	0.396393	1.05276	0.806168	0.580986	0.226756	1.46055	0.866135	1.01909	0.994638	0.951559	1.09077	1.28108	1.32296	1.31714	1.49179	1.08834	1.41923	1.6849	0.780723	1.19263	0.745484	0.618727	0.568174	1.31778	1.00548	0.438851	0.996595	1.84633	0.288821	0.703274	0.204348	1.1985	0.143911	0.893971	0.780396	1.10615	0.407119	0.496755	0.917344
903	21.3056	447.054			0.150444	3.94589	0.151811	13.6303	0.785267	0.251498	0.694315	0.160593	0.140951	0.155102	0.718525	0.76157	0.812166	0.145758	1.19841	0.767876	0.820379	1.28962	1.28789	0.694049	0.50227	0.907422	0.196672	0.151074	0.73558	0.159747	1.2402	0.142748	0.135703	0.767544	1.38265	0.697053	0.762481	0.453865	0.771183	0.151917	0.693703	1.48388	0.168722	0.149165	0.702621	0.722905	0.139661	3.15603	0.141986
906	21.3432	560.09			1.04486	0.522687	0.892942	0.969559	1.2746	0.99102	1.12845	1.45635	1.26285	1.3601	0.475361	1.11788	1.03404	1.02325	1.24619	1.48169	1.12694	1.05114	1.02424	1.08216	1.0461	1.20952	0.938264	0.718538	0.909722	0.939359	0.879687	1.13381	1.04796	1.11754	1.07791	0.760099	1.14539	0.718014	0.655565	0.777868	0.428188	1.16775	0.321893	1.25713	0.669329	1.01212	1.43873	0.826654	1.62909
940	21.4504	574.059			0.452271	0.540842	0.23993	1.44428	0.920934	1.4504	0.378961	1.50635	1.01569	1.02171	0.242818	1.33266	0.903552	1.11726	1.06365	1.07682	1.12431	1.24255	1.38661	1.54496	1.13586	0.907562	1.40022	1.22595	0.809696	1.13821	0.431952	0.662542	0.574434	1.23671	1.07097	0.292956	0.958027	1.45836	0.274687	0.707841	0.213225	1.30298	0.188938	1.11079	0.738194	0.728226	0.665219	0.3941	1.44934
955	21.5773	479.046			0.768008	0.609317	0.248404	1.22944	0.871465	1.26842	0.246031	1.28278	1.15225	0.976572	0.219604	1.20674	1.03831	1.27302	1.11637	0.853233	0.933341	1.2343	1.30375	1.43833	1.27946	0.899103	1.2952	1.07529	1.06223	1.06306	0.611485	0.993093	0.681631	1.21401	1.1954	0.247903	0.944373	1.21101	0.258757	1.01497	0.201372	1.32806	0.194984	0.983565	0.718261	0.875162	0.729862	0.401574	1.37779
965	21.6666	463.049			0.795904	0.525093	0.263978	1.17642	0.747823	1.23258	0.245179	1.31569	1.11465	0.955616	0.228424	1.17545	0.972516	1.30497	1.07217	0.706945	0.839342	1.24866	1.32119	1.57458	1.37859	0.784433	1.24797	1.06564	1.07142	0.935982	0.554523	1.06768	0.587049	1.20213	1.1805	0.239133	0.870702	1.20482	0.265314	1.05456	0.21092	1.38215	0.211615	0.850225	0.675671	0.818395	0.682879	0.389043	1.46685
967	21.7042	594.154			0.766276	1.79372	0.62877	2.49881	0.857437	1.15869	1.76404	0.851589	0.751748	0.714916	1.32853	0.973072	1.01013	1.01849	0.671223	1.11491	0.924103	1.25718	0.800148	0.851385	1.14756	1.51465	1.1217	1.17272	0.63561	0.844494	1.32442	0.594138	0.95564	1.5696	0.657234	1.14079	1.64712	1.23759	1.24288	0.538439	1.39198	0.774373	1.06951	1.03385	0.950066	1.27272	0.626912	1.08696	0.742451
973	21.7756	469.037			1.10094	0.578419	0.506432	1.0164	0.923615	1.05206	0.384517	1.50137	1.16413	1.21632	0.310726	1.0972	0.880622	1.13982	1.13557	0.903891	0.975412	1.12609	1.20695	1.24405	1.27731	1.01465	1.05021	0.849486	0.911503	0.894293	0.608986	1.34553	0.808087	1.20818	1.1469	0.456855	0.982893	0.87704	0.379316	0.998857	0.287238	1.33905	0.448814	0.958828	0.67611	0.972598	0.970923	0.729034	1.75825
977	21.7935	681.239			0.865379	1.94331	0.696721	1.71597	1.02881	1.0985	1.39498	0.925463	0.735947	0.559198	0.93362	1.07619	0.61635	0.817816	1.04874	1.18475	1.00872	0.939125	1.22612	1.08407	1.11153	1.51683	1.02502	1.19	0.594013	1.42467	1.39671	0.694766	0.755023	1.00219	0.73621	1.2156	1.09386	1.53074	1.1107	0.676438	0.858089	1.00218	1.1173	0.810051	0.729471	1.30707	0.750863	0.815784	0.740291
983	22.3707	625.14			0.992093	0.986946	0.998367	0.937492	0.977768	1.05739	0.957739	1.02695	0.97406	1.00009	0.909863	1.04599	0.991492	1.03445	1.06178	1.10962	1.12506	1.02354	0.952185	1.03974	0.989595	1.15342	0.918173	0.930587	1.00947	0.928031	0.935182	1.02867	0.987869	1.02287	0.973115	0.909889	1.04673	1.01384	0.943926	0.956294	0.908444	1.12711	1.04252	1.0027	0.962674	0.909064	1.00066	0.974279	1.03358
994	22.6066	325.058			0.631102	0.462525	0.402049	0.729062	0.35377	1.94083	0.346509	1.78384	0.464787	1.67214	0.315857	1.92113	0.334712	0.867469	0.432009	1.46355	2.04449	2.25132	1.59848	1.60947	0.659765	0.408568	1.11898	2.12926	0.581602	0.432413	0.471484	0.391094	0.40972	2.1635	0.339181	0.393087	0.386308	1.18011	0.323691	0.395022	0.294957	1.27046	0.425771	1.33939	0.333788	1.2051	0.392909	0.649749	2.29928
997	22.7871	935.207			0.959812	0.990067	0.859389	1.3663	0.929189	0.980093	0.846104	1.10466	0.942088	0.959466	0.935635	1.00107	0.972431	1.02829	0.881102	0.980984	0.896248	1.04389	0.909885	1.03888	0.990593	1.02268	1.0214	0.965354	0.88366	0.960332	1.06292	0.966445	0.908711	1.58909	0.978359	0.838306	0.941428	1.23578	0.876222	0.88571	0.914098	0.960198	0.955666	0.994403	0.842913	1.01058	0.841514	0.956332	1.0137
1005	22.8586	700.144			0.917043	1.00153	0.834255	1.49825	0.939931	1.00092	0.876463	1.06426	0.918289	0.938748	0.938061	1.0374	1.01597	1.02153	0.904751	1.01702	0.941278	0.984773	0.972215	1.02078	0.966856	1.06304	1.03294	0.956208	0.909567	0.93215	1.06058	1.00337	0.904298	1.25249	0.995955	0.823401	1.02202	1.26753	0.910699	0.900005	0.947499	1.03529	0.914094	1.03832	0.892313	1.11757	0.856386	0.993211	1.03723
1019	23.5091	385.188			0.894867	1.45995	0.655281	1.54375	1.05638	1.16485	1.0615	1.05017	0.82974	0.955179	0.629321	1.17044	0.729579	0.970076	1.00096	1.15733	1.07067	1.07062	0.969188	1.17216	1.18676	1.45435	1.24133	1.12739	0.616708	1.19194	1.73345	0.860281	0.703053	1.03549	0.926096	0.933775	0.952896	1.31529	0.733716	0.743781	0.602999	1.08577	0.831207	0.740194	0.572598	1.31758	0.99082	0.759915	1.0764
1025	23.7968	579.163			0.97612	1.0486	0.989778	1.0649	0.97837	0.927626	0.997308	0.979632	0.989792	0.98152	0.998793	0.994726	0.943963	1.01564	1.01655	1.01556	1.02999	0.987227	1.01604	1.01348	1.02069	0.94645	1.00896	1.0045	1.04381	0.982168	1.05072	1.00171	0.965976	0.998997	1.00443	1.00022	1.03956	1.03274	1.04012	1.0152	1.02005	0.956474	1.01833	1.01603	0.994147	1.01888	0.978703	1.01593	0.973529
1032	23.9058	739.208			0.96709	1.46315	0.96863	1.9545	0.901552	0.883655	1.21459	1.08689	0.957262	0.845153	0.875065	1.18058	0.935569	0.915743	0.847457	0.892455	0.939018	1.01221	0.848691	0.976335	1.00402	1.2298	1.08068	0.9515	0.863724	0.845055	0.991276	0.911599	0.887828	1.39755	0.909067	0.931525	1.13021	1.27331	0.971454	0.879761	0.953864	1.01791	1.05052	0.918915	0.882253	1.272	0.861533	1.0649	0.957156
1039	24.1756	1342.34			0.701596	1.00884	0.597631	2.50636	0.645595	0.891711	0.565931	1.24543	0.717614	0.692143	0.718051	1.18407	0.893611	1.07143	0.822944	1.03079	0.824919	0.710829	1.18726	1.3495	0.99316	0.909706	0.96517	0.873205	0.806043	1.52931	0.833578	0.858851	0.772282	1.12493	1.08473	0.332741	0.843124	1.46113	0.596825	0.603528	0.446424	1.28474	0.49582	0.753404	0.576139	1.50871	0.756917	0.77211	0.956382
1049	24.2847	755.203			0.767251	1.15944	0.582576	1.26742	0.919714	1.15045	1.00694	1.16325	0.777685	0.921991	0.94366	1.07915	0.642151	0.990908	0.865997	0.966198	0.953087	1.08241	0.934597	0.888878	0.952178	1.64994	1.11359	1.08184	0.636412	0.965172	1.04612	0.847359	0.80106	1.37365	1.00312	0.894956	1.17389	1.57615	0.879109	0.676169	0.804991	1.2461	0.984588	0.882165	0.780257	1.25319	0.971947	0.975203	1.149
1053	24.6814	431.192			0.978741	1.22217	0.667508	1.46594	1.09797	1.11811	1.05114	1.20568	0.825034	0.904664	0.528348	0.995502	0.705418	0.990403	1.10572	1.18845	0.91777	1.01007	0.863779	1.0918	1.09773	1.46057	1.11883	0.918406	0.682379	0.976013	2.28838	0.913483	0.741179	1.08343	0.923822	0.86395	0.952692	1.3157	0.815778	0.624363	0.631942	1.15787	0.856269	0.884729	0.588171	1.27909	0.882951	0.952808	1.13689
1064	24.8976	699.139			1.04679	1.03217	1.00599	0.986469	0.925553	0.99278	1.03252	1.03562	1.01916	1.02192	0.982846	0.939355	0.991103	1.01155	1.00055	0.999889	1.02868	0.975894	0.957369	1.00597	0.973535	0.998057	1.01458	1.00875	1.01444	0.989767	0.97739	0.970794	1.02614	1.20881	0.945528	0.958441	0.940328	1.05715	1.00052	0.966179	0.95434	1.00466	0.976819	0.985506	0.968278	0.949936	1.02069	1.00176	0.933834
1068	24.9888	709.197			0.981433	1.45217	0.982547	1.53686	0.886201	0.936592	0.992543	1.12928	0.972262	0.990822	0.985972	0.923625	0.956732	0.974615	1.00012	1.08111	0.988261	0.956507	1.00612	1.01654	0.991744	1.30551	0.967125	1.00154	1.00268	0.999674	0.935172	0.958361	0.957809	1.43493	0.914768	0.923252	1.10772	0.994421	0.991321	0.956417	0.923236	1.21584	0.933933	0.974707	0.948221	0.910793	0.947957	0.989735	0.976342
1078	25.3498	1190.32			0.725547	1.33328	0.512327	2.91749	0.868022	1.25281	0.890169	1.15933	0.760726	0.949445	0.986559	1.41859	0.68035	0.93087	0.650764	1.01245	0.992334	1.19219	0.868698	0.909176	1.16957	1.61199	1.12122	1.03174	0.575994	0.843077	0.964804	0.877803	0.667894	1.71622	0.657053	0.816226	1.28304	1.36621	0.84858	0.594405	0.827036	0.888529	0.895704	0.914908	0.729535	1.57467	0.679478	1.14239	1.22316
1090	25.5303	594.154			0.890472	1.15282	0.783583	1.37233	0.981898	0.998631	1.03603	1.01475	0.931242	0.96069	1.10232	1.11918	0.911889	1.01412	0.856298	0.969907	0.972404	1.06083	0.987714	0.982393	1.03403	1.15243	1.03638	1.05611	0.791204	0.958936	1.03478	1.13477	0.885747	1.18626	0.875375	1.03199	1.09111	1.10049	0.988103	0.829982	1.10421	0.988938	1.05708	0.971762	0.986475	1.16462	0.885902	1.10066	1.06174
1100	25.6374	1157.3			0.905548	1.05188	0.804537	1.82451	0.963612	1.02732	0.933962	1.17861	0.911588	0.905925	0.806284	1.23614	0.993505	1.03613	0.852502	1.10391	0.873672	1.12084	1.01474	0.960435	1.06392	1.15189	0.944132	0.956892	0.771889	0.915805	1.01877	1.04579	0.849818	1.31328	0.943596	0.900087	1.00827	1.11279	0.797818	0.76731	0.944865	1.08466	1.13248	0.940967	0.805526	1.00483	0.948679	1.07338	1.20043
1107	25.7286	683.145			0.986132	0.929154	0.808977	1.38144	1.0187	1.09003	0.919053	1.24927	1.00203	1.0061	0.708966	1.21976	0.993358	0.987096	0.925414	1.16849	0.884548	1.12621	0.947566	0.968806	1.11745	1.19269	1.04498	0.921029	0.729532	0.930837	0.980394	1.03072	0.842862	1.29906	0.935244	0.843921	1.1494	1.0769	0.807389	0.770841	0.744765	1.1596	1.07577	0.950717	0.696645	1.10722	0.96307	1.05158	1.36988
1132	26.1075	708.148			1.00692	0.958729	0.949892	1.12774	1.06044	1.03985	1.1063	1.06147	0.998936	1.04462	0.892892	1.0019	0.935543	1.00334	0.969663	1.01622	0.99669	1.03923	0.935329	1.00708	1.0139	1.13594	1.03979	0.977397	0.875502	0.989122	0.959337	0.955815	0.910274	1.0748	0.977499	0.991517	1.08729	1.07432	0.999135	0.936167	0.867142	1.00144	0.995755	1.00397	0.86007	1.10821	0.947839	1.02181	1.1133
1139	26.1789	451.061			0.401752	0.367734	0.291901	0.920948	0.281212	1.39569	0.244937	0.819304	0.889779	1.56947	0.215122	1.34382	0.315823	1.11751	1.03469	1.70812	1.75714	1.65274	1.6423	1.28838	1.25893	0.429496	1.83042	1.3137	0.873071	2.11363	0.39961	0.534013	0.541175	1.1751	0.405653	0.293843	0.487426	1.12041	0.23244	1.2595	0.197906	1.69691	0.299807	1.82851	0.57082	1.73273	0.836226	0.227842	0.918466
1143	26.2701	423.063			0.370671	0.432908	0.280857	1.7011	0.467101	1.28309	0.276036	1.27338	0.752781	1.14975	0.261783	1.22706	0.588366	1.02885	1.0673	1.39146	1.44507	1.37507	1.42161	1.34614	1.15642	0.481087	1.61014	1.18528	0.827474	2.32356	0.432132	0.509756	0.454564	1.10547	0.771035	0.287941	0.546961	1.63852	0.275292	0.809426	0.22945	1.59431	0.283575	1.22141	0.572457	1.71906	0.665079	0.276631	1.07742
1151	26.5775	565.192			1.06997	1.34834	0.7254	1.26552	0.886537	1.24256	0.560284	1.11031	0.93127	0.721811	0.547589	1.09065	0.729846	1.09456	0.91536	1.34588	1.50192	0.976037	0.600589	0.993699	1.18042	1.33688	1.06599	1.12075	0.8467	1.39794	1.43209	0.913634	0.831301	0.979461	0.786271	0.709698	0.682799	1.37519	0.691756	0.740295	0.454171	1.24778	0.790287	0.784741	0.662613	1.23762	0.830872	0.830294	1.11701
1158	26.6847	359.151			1.18031	0.759865	0.802807	1.20374	0.95746	1.03436	0.886406	1.47213	0.91649	0.983646	0.748047	1.1431	0.516124	1.07465	0.950684	0.966052	1.17592	1.06582	0.986661	0.955043	0.973008	1.51999	1.07962	0.746742	0.698204	0.867942	0.79056	0.949837	0.775998	1.21566	0.850007	0.831306	1.02742	0.992452	0.926103	0.714541	0.646245	1.20847	0.952178	0.947121	0.73074	1.06086	1.03813	1.11084	1.40588
1187	27.244	1000.19			0.936585	1.30024	0.460287	1.66187	0.990432	1.22649	0.612314	1.06053	1.01492	0.942533	0.521593	1.06756	0.587878	1.17835	0.966701	1.13826	1.13563	1.17532	1.22382	1.20379	1.22353	1.2793	1.31113	1.28479	0.57935	1.03569	1.2348	0.834127	0.765141	1.39096	0.71226	0.624497	1.13799	1.28306	0.612454	0.778782	0.435908	1.08579	0.512029	0.930529	0.659653	1.18843	0.913583	0.687765	1.018
1194	27.2995	483.059			0.953462	0.7915	1.09114	1.11094	1.10034	0.958609	0.936969	1.26982	0.959348	1.16324	0.686319	1.06579	0.931327	0.969162	1.10993	1.12048	1.00744	1.0625	1.08884	1.01754	1.14064	1.0943	1.01801	0.868693	0.866441	0.891234	0.957466	1.20069	1.04837	1.15384	1.01125	0.702504	1.06579	0.879845	0.837105	0.843503	0.666709	1.09591	1.07256	0.906915	0.710918	1.0559	1.2197	0.843924	1.35471
1200	27.3531	463.089	quercetin-3-O-hexoside	2	0.56507	1.39695	0.552932	1.74009	0.836529	1.21426	0.842768	0.867262	0.869167	0.880213	0.994519	1.11664	0.981727	0.879893	0.937449	1.0626	1.03414	0.74895	1.13147	1.07991	1.2105	1.28322	1.13267	1.16937	0.650695	1.16913	0.932204	0.654996	0.832232	1.31461	0.752817	1.09222	1.20584	1.52972	0.684159	0.882784	0.909234	0.895489	1.02559	0.959919	0.642725	1.4171	0.8895	0.891642	0.891815
1207	27.6784	506.12			0.361585	0.440992	0.245238	1.67902	0.865207	1.36646	0.337168	1.49276	0.914274	0.918878	0.278705	1.4902	0.801678	1.07523	0.901749	0.95352	1.19896	1.42546	1.46913	1.65986	1.00294	0.938915	1.5787	1.21417	0.565606	1.41315	0.348394	0.514693	0.461776	1.31167	0.944488	0.273409	1.11779	1.64712	0.294628	0.545082	0.243393	1.19756	0.237796	1.31502	0.661886	0.650466	0.444767	0.385302	1.38824
1219	28.327	661.124			0.906757	0.679999	1.22235	0.855739	1.08312	0.869407	1.0547	1.08065	1.10277	1.21653	0.671071	1.0394	1.07123	1.05513	1.07367	1.09384	0.937888	1.07931	1.05738	1.00477	1.08224	1.06206	1.03437	0.861203	0.909434	0.860963	0.849484	1.08742	0.884478	1.07589	1.01805	0.851587	1.08541	0.761208	0.8815	0.929571	0.726981	1.12527	0.949788	1.03419	0.659276	0.947986	1.13744	0.954991	1.45392
1253	28.4182	1464.38			0.924053	0.968822	0.682209	1.63217	1.01958	1.08012	1.07645	1.24573	0.958263	1.01187	0.777542	1.17449	0.873286	1.00743	0.816574	1.00294	1.06899	1.1213	0.886599	0.949283	1.2456	1.30856	1.1421	0.918315	0.647994	0.852941	0.858064	1.01872	0.830089	1.36831	0.753447	0.884334	1.18717	1.15083	0.89789	0.690331	0.75861	1.08074	1.07416	0.945183	0.719039	1.07194	0.847863	1.03218	1.35372
1265	28.4718	689.153			1.10565	0.747373	0.945599	1.03658	1.10099	0.97846	1.07861	1.32429	1.10217	1.17977	0.66666	1.04266	0.976749	0.964892	1.03314	0.921053	0.965683	1.08994	0.975359	1.05048	1.16031	1.14086	1.13638	0.790192	0.825029	1.01705	0.914917	1.04422	0.965206	1.14222	1.00602	0.873312	1.07764	0.871224	0.864143	0.788993	0.71952	1.13803	1.14835	0.939643	0.686696	1.03957	1.15911	0.929416	1.43591
1268	28.5254	887.225			0.917121	1.21461	0.528021	1.39359	0.873172	1.07328	0.926876	1.07106	0.772013	0.728821	0.862721	1.20459	0.713839	0.945949	1.04075	1.04524	1.24744	1.14474	1.28519	0.954526	1.20704	1.59934	1.1511	1.45313	0.600712	0.748459	1.75644	0.796929	0.685149	1.15692	0.688331	0.92044	1.30838	1.42909	1.04915	0.664086	0.868375	1.02382	0.997804	0.99277	0.769131	1.17752	0.766444	1.0215	1.04177
1279	28.6344	919.238			0.687647	1.84463	0.397977	2.33367	0.79937	1.2077	0.783044	0.931173	0.766638	0.677655	0.737939	1.37049	0.714487	0.789333	0.751165	1.10523	1.16896	1.16783	0.970966	0.981947	1.10583	1.44516	1.00552	1.30679	0.589877	1.34508	1.11793	0.73366	0.681494	1.34496	0.63929	0.883652	1.10414	1.56366	0.757087	0.54784	0.717014	1.08866	1.07724	0.893753	0.76372	1.60009	0.606751	1.03546	0.885476
1290	28.8149	115.005			1.00905	1.00189	0.743198	1.0984	0.944856	0.982365	0.748635	1.21549	1.02692	1.01332	0.61188	1.07812	0.900986	0.99196	1.03965	1.15994	1.01024	1.10283	1.0925	1.02813	1.0954	1.18985	1.12996	0.948649	0.981457	0.964063	1.13327	1.0499	0.829477	1.20827	0.954671	0.610802	1.13001	1.0814	0.826314	0.813185	0.640357	1.23548	1.02119	1.00141	0.649494	1.06585	0.983421	0.885167	1.21444
1359	28.9954	505.135			1.01647	1.13465	0.772749	1.12556	0.948896	0.991652	0.906274	1.20381	0.930135	0.8839	0.622466	1.04311	0.681857	0.985124	0.910736	1.09994	1.07453	1.02172	1.05351	1.08246	1.12644	1.32745	1.13479	1.00968	0.842048	0.971649	1.13064	1.00194	0.759339	1.04463	0.918803	0.906926	0.937282	1.32982	0.863652	0.722123	0.669846	1.12251	1.1194	0.925775	0.625397	1.05466	0.877066	1.02066	1.17165
1370	29.1402	607.159			0.938195	1.13798	0.8929	1.27721	0.897574	1.06741	0.952872	1.03231	0.902885	0.883521	0.924716	1.07605	0.89157	0.889352	0.947076	0.990362	1.02151	1.06954	0.996122	1.03114	1.02998	0.911468	0.974666	1.06496	0.93385	1.11945	1.00978	0.995097	0.934067	1.0896	0.94275	0.985623	1.04201	1.21286	0.923182	0.929238	0.951817	1.0568	1.02799	0.970232	0.916439	1.11617	0.934093	1.0326	0.997771
1400	29.41	710.15			0.873596	1.02106	1.27769	0.928979	1.83912	0.79603	1.67886	0.87022	0.85159	0.925602	0.582331	0.318811	1.12488	0.9561	1.36868	0.314399	0.277514	0.288725	0.286026	0.942237	0.970341	3.84589	0.899294	0.883013	0.28271	0.787961	1.29791	0.90714	0.904704	0.330888	2.24961	2.45973	1.92257	0.903337	1.62776	0.89093	1.38826	0.301893	1.33317	0.877608	0.881902	0.26564	0.885306	1.05119	0.969732
1409	29.6638	505.135			0.964404	1.33812	0.721355	1.25543	0.943502	1.04131	0.980995	1.20939	0.883821	0.803174	0.636756	1.01364	0.577696	0.982532	0.92993	1.08494	1.08362	0.986268	1.12445	1.10484	1.21635	1.42118	1.11437	1.1143	0.768048	0.987828	1.16502	0.952365	0.755458	1.03873	0.88136	1.02289	0.888131	1.46143	0.816975	0.62439	0.637794	1.16538	1.1154	0.875247	0.647401	1.09239	0.781651	1.02789	1.13786
1416	29.771	519.187			0.975981	1.24511	0.931314	1.17987	1.03747	1.07728	0.953878	1.27091	0.91015	0.737002	0.55536	1.01722	0.768089	0.968413	0.991882	1.16739	1.07981	1.00188	1.06244	1.01362	1.1033	1.44235	1.06448	1.03499	0.867116	0.994446	1.15098	0.998996	0.833111	1.12777	1.04153	0.880589	1.09669	1.2765	0.960776	0.64128	0.679931	1.29328	1.18589	0.953769	0.632449	1.00974	0.756134	1.03294	1.2491
1421	29.9158	121.031			0.945967	1.62116	0.834319	0.947515	1.0077	0.961541	1.55298	0.984696	0.785936	0.719218	0.716469	0.984402	0.69127	0.785955	0.918245	0.921845	0.81696	0.820471	0.980891	1.22995	0.982582	1.62965	1.03384	1.34096	0.975563	1.12639	1.34157	0.98047	0.744466	0.800442	1.20603	1.4523	0.996853	1.66456	0.960805	0.7234	0.804046	1.07389	1.13937	0.718274	0.555271	1.00207	0.73747	0.991849	0.961084
1430	30.8361	448.098			0.846489	1.94291	0.603918	1.86321	0.887327	1.01467	0.659835	1.10835	0.939843	1.01321	0.841593	1.25435	0.964582	1.00017	1.05772	1.33818	0.622195	1.05493	0.961778	1.05569	1.17642	1.13724	1.02032	1.12199	0.788585	1.13737	1.12417	0.91478	0.87816	1.40168	0.791495	0.66187	1.17186	0.65143	0.700574	0.873367	0.598485	1.09371	0.66214	0.672379	0.864664	1.71322	1.02919	0.91032	1.09273
1437	31.1613	1179.28			0.620754	1.16741	0.554298	3.01011	0.58175	0.918796	0.628143	1.41523	0.82926	0.686191	0.657329	0.958392	0.968716	1.11309	0.566754	0.987968	0.564501	1.059	1.04654	1.58448	0.874101	0.794011	1.207	0.770648	0.653888	1.05826	0.551734	0.753157	0.975777	1.27797	0.798418	0.328987	0.631919	1.41031	0.544415	0.462719	0.376853	1.4064	0.424497	0.689243	0.349317	1.4497	0.560399	0.947407	0.857982
1440	31.3419	477.104			1.00636	0.904072	0.934766	0.957104	0.939898	0.951608	0.947557	1.06177	0.989939	1.06459	1.06698	1.06447	1.00734	1.05601	1.04224	1.06334	1.03377	1.00196	1.02672	0.929494	1.05966	1.04092	1.0754	1.00866	0.985307	0.995676	0.948131	1.02033	1.02045	0.881974	0.982346	1.07771	0.94198	0.952738	1.10536	1.0237	0.934079	0.968532	1.05206	1.04408	0.946241	0.959211	0.992688	1.00115	1.02629
1444	31.3776	710.164			0.975488	1.01	0.985944	0.990239	1.96958	0.929915	1.83058	1.0529	0.974744	0.914708	0.538306	0.168205	1.2395	0.887549	1.43001	0.17808	0.179518	0.179429	0.182527	1.05705	1.08022	4.10913	0.957697	0.983502	0.175835	1.02228	1.05105	0.995546	0.930294	0.176379	2.43482	1.98859	2.04052	1.14661	1.6442	0.925652	1.41955	0.191713	0.991674	0.972367	0.813422	0.178658	0.921246	1.03619	0.943639
1447	31.919	403.094			0.477364	0.691749	0.277695	1.89475	0.765166	1.35451	0.384534	1.37243	0.893637	1.08514	0.312801	1.32763	0.815345	1.05797	0.860253	1.17693	1.2059	1.2226	1.19441	1.46829	1.30117	0.926897	1.61062	1.07916	0.703863	1.78493	0.619479	0.695721	0.4279	1.21877	0.923973	0.219633	0.775684	1.74967	0.331078	0.694871	0.208583	1.36472	0.182575	1.03468	0.572228	1.54879	0.782007	0.391974	1.33173
1451	32.4963	1058.39			1.01015	1.00246	1.01562	0.92342	0.99206	0.998593	1.0207	0.928483	1.02473	0.990809	1.0267	1.00272	1.0192	0.991255	1.02686	1.07145	1.01744	1.03232	1.00096	1.05845	1.03017	1.06732	0.964828	0.96892	0.945567	1.08459	0.980921	0.999342	1.01024	0.918129	1.01953	0.975771	0.995246	0.995553	0.908788	1.03668	0.995775	0.928902	1.01336	1.04137	0.983731	1.04109	0.974085	0.948147	0.981262
1455	33.0377	419.093			0.716133	1.94113	0.354858	2.44416	0.805418	1.36702	0.394291	0.890659	0.800529	1.00203	0.729704	1.23557	0.519113	1.02954	0.980259	1.43785	0.95832	1.11226	1.20493	1.83949	0.982761	1.11513	1.07994	1.45327	0.42983	1.25944	1.27439	0.616178	0.586041	1.00726	0.548996	0.530628	1.00415	1.37105	0.578869	0.682278	0.414592	0.85465	0.375489	0.64649	0.694853	1.77084	1.07371	0.400367	0.949403
1463	33.3451	534.264			0.583981	1.90204	3.87524	0.320286	2.05125	0.331246	5.5811	0.314474	0.33399	0.30606	2.02485	0.36461	0.434587	0.303743	0.396494	0.366718	0.37936	0.368815	0.38845	0.396516	0.4977	2.44254	0.332348	0.301568	0.372204	0.318978	1.55955	1.97032	1.54963	0.36215	0.797625	5.42766	1.25283	0.329519	2.55834	0.438394	2.76203	0.353179	2.36856	0.332317	0.363446	0.367854	0.388939	3.04154	0.323529
1470	33.7061	592.175			1.13388	1.20112	0.563657	1.15256	0.767306	0.950093	0.266218	1.63212	1.14561	0.861244	0.602391	1.21431	0.951527	1.08156	0.847846	0.921359	0.889601	0.847846	1.11317	1.14672	1.16536	1.16987	1.01671	0.483833	0.969219	0.578571	1.29468	1.25696	0.913181	1.11188	1.01385	0.295275	1.07024	1.21027	0.604981	0.754399	0.522001	1.37468	0.798134	0.831781	0.634725	0.986589	0.679895	0.802766	1.30044
1473	33.8509	419.136			0.946198	1.62694	0.850987	0.92495	0.924333	0.845192	1.08546	1.18196	0.921848	0.911965	0.714236	0.980408	0.710577	0.838942	0.903365	1.05915	0.991294	0.923783	0.996777	1.02443	1.07971	1.43095	0.89726	1.01405	0.818453	2.07425	1.22686	0.909149	0.74741	1.05525	0.968392	1.16734	0.999558	1.17179	0.861239	0.649352	0.77908	1.23596	1.31315	0.786391	0.635713	1.10546	1.0342	1.11937	1.11407
1479	34.0671	994.093			0.452387	0.443633	0.449064	2.09101	0.406203	0.987527	0.39932	2.02227	0.439395	0.742737	0.403985	0.78241	0.428091	0.485685	0.644981	1.37177	0.516026	1.19237	1.08697	1.76312	0.540853	0.41719	1.69811	1.5381	0.461305	1.74757	0.422866	0.440105	0.434759	0.664567	0.423168	0.447905	0.412203	1.36635	0.410848	0.521732	0.405712	1.13452	0.435752	0.940248	0.444889	0.908974	0.432091	0.53966	0.534158
1492	34.2119	511.056			0.325833	0.485725	0.198573	1.76951	0.4694	1.21235	0.219977	1.64956	0.532818	1.05864	0.193947	1.13693	0.524193	0.860924	1.07965	1.45345	0.890849	1.34095	1.29899	1.64379	0.774815	0.471875	1.60604	1.43205	0.803042	1.58303	0.432654	0.462678	0.349304	1.10562	0.693589	0.188292	0.55282	1.36659	0.177705	0.906165	0.175795	1.39765	0.182827	1.16288	0.608289	1.26512	0.739815	0.249349	0.963403
1506	34.6443	464.074			0.662912	0.66166	0.601497	0.822032	0.448402	1.41337	0.348833	0.81463	0.953755	1.62659	0.394229	1.34953	0.429387	1.07562	0.659779	1.49584	1.87545	2.00001	1.6219	1.28338	1.02098	0.528373	1.6661	0.993179	0.588885	1.45359	0.712332	0.751148	0.676946	1.26148	0.445828	0.600687	0.484246	0.873288	0.398279	0.922231	0.39358	1.44554	0.571019	2.15074	0.529114	1.37087	0.808199	0.367834	0.907752
1510	35.0787	520.219			1.02948	1.16003	0.701564	1.00166	1.18863	1.2093	1.10853	0.918728	0.930216	0.603028	0.452339	0.871083	0.757587	1.12244	1.04463	0.864176	0.919259	1.01145	1.16809	1.54424	0.954405	1.1812	1.31342	0.865561	0.985275	1.01916	0.911107	0.982182	0.940099	0.521596	1.26311	1.42887	0.896629	1.73112	1.05164	0.564821	0.634683	0.96504	0.903375	0.590302	0.491129	0.963165	0.813555	0.465341	0.829384
1516	36.4493	720.275			0.976763	0.981677	0.958235	0.987204	1.04782	0.97777	0.932481	0.986044	1.03747	0.998749	0.999785	1.06041	1.00626	1.01908	1.01963	1.04208	0.972027	1.0257	0.976018	1.00065	0.939601	1.00916	0.990875	1.07218	0.999713	1.02841	0.988622	0.982677	1.00897	1.06147	0.979691	0.951726	0.944669	1.03346	0.969827	1.01768	0.998135	1.06912	0.995894	1.03827	0.946954	1.0738	1.06506	1.0535	1.03397
1520	36.721	521.223			1.00531	1.16403	0.719281	1.0225	1.12594	1.1373	1.16115	0.829504	0.888057	0.60625	0.597668	0.815147	0.814757	1.05716	0.991008	0.787827	0.875767	1.07771	1.09749	1.41844	1.09712	1.10972	1.29202	0.880081	0.902055	1.12197	0.880209	0.9877	0.920923	0.707257	1.229	1.44246	0.857018	1.68529	1.01541	0.907806	0.70179	0.881282	0.957916	0.606176	0.656104	0.93772	0.854769	0.535433	0.832335
1522	36.8103	591.171			0.815212	1.22541	0.24905	1.40277	0.576342	0.996561	0.119869	1.54492	0.855399	0.742829	0.473656	1.1816	0.721139	0.962714	0.819039	1.06823	0.925398	0.805241	1.5321	1.26136	1.22205	0.92117	1.12892	0.850895	0.952736	1.08006	1.43873	0.948976	0.857178	1.13064	0.876661	0.123891	1.13854	1.45833	0.241891	0.680663	0.162746	1.72542	0.186326	0.938287	0.563012	1.23131	0.794215	0.266649	1.16999
1529	38.1471	724.346			0.514609	2.46801	3.6524	0.345431	1.65786	0.311146	5.08972	0.292339	0.308501	0.318948	3.46404	0.45639	0.45497	0.305838	0.45164	0.421246	0.433513	0.423948	0.446634	0.353415	0.481241	2.13542	0.291664	0.294196	0.46236	0.303251	1.93701	1.9714	1.4531	0.468296	0.652764	4.95391	1.31829	0.286415	2.09	0.389437	2.78397	0.428946	1.91534	0.294178	0.44706	0.435338	0.363667	3.24783	0.325074
1534	38.3097	599.081			0.554458	0.595922	4.40924	0.561946	1.07551	0.57422	8.40635	0.548133	0.556846	0.57872	0.809449	0.388644	0.405888	0.561421	0.38042	0.381255	0.382578	0.384822	0.378364	0.572932	0.542824	1.07592	0.556165	0.560979	0.381261	0.53844	0.586046	0.637819	0.637695	0.388449	0.515351	7.17234	0.512685	0.570209	2.7477	0.54613	3.97916	0.364929	4.05253	0.563134	0.392569	0.374422	0.530616	3.12733	0.543276
1542	39.121	205.052			0.73651	1.40658	0.758336	0.857883	0.813983	1.27215	0.494278	1.71908	0.670456	0.686272	0.337398	0.800872	1.06487	0.759653	0.909955	0.962841	1.24135	1.09343	0.653906	1.01933	0.909208	1.43327	0.822794	1.63471	0.616922	0.703595	1.95273	0.696738	0.729121	1.20765	0.981558	0.656799	1.47023	1.33149	0.470614	0.735941	0.44759	1.47913	0.771441	0.745146	0.336522	0.618791	0.642672	1.0129	0.999543
1548	39.591	371.115			0.964048	1.23116	0.721255	1.15542	0.94563	1.06506	1.00033	1.22146	0.927813	0.876184	0.616511	0.966048	0.65669	0.956834	0.923123	1.02528	1.09333	1.10329	1.13414	1.06777	1.31543	1.37765	1.11278	1.02779	0.80836	0.860522	1.21492	0.913332	0.767338	1.07568	0.856314	1.08844	0.889051	1.40708	0.792144	0.680825	0.727884	1.15512	1.03716	0.81752	0.605523	1.11175	0.793832	1.01758	1.16015
1565	39.6446	733.28			0.988564	1.00856	1.02465	1.01839	1.0298	1.01338	0.987393	1.00292	1.02378	1.00318	0.975249	0.981073	1.03501	1.00996	0.994909	0.966561	0.979601	1.00551	1.02268	1.00992	0.997098	0.970212	1.00748	0.985758	0.9673	0.999821	1.03618	0.96946	1.01287	0.984851	0.995011	1.02845	1.01361	0.988807	0.998938	0.988236	1.00401	1.03011	1	0.994646	0.993264	1.02272	0.975651	1.00777	0.982311
1574	39.716	704.279			1.01005	0.995263	1.01254	1.01385	1.03267	1.02962	0.991664	1.00141	1.0053	1.00242	0.979078	0.975141	1.05579	0.994595	1.01342	0.956118	0.965102	1.00475	1.01137	0.9981	1.00301	0.997607	1.01709	0.977136	0.949023	1.00483	1.03574	0.95583	0.993068	0.993176	0.993159	1.01584	1.00879	0.992181	1.01297	1.00049	1.00314	1.03029	0.993123	0.985382	0.99441	1.00381	0.976056	1.01807	1.00678
1575	40.077	561.125			0.580108	0.532919	5.63288	0.612082	0.833756	0.596439	9.4797	0.564248	0.558791	0.618953	0.441235	0.462277	0.445394	0.590936	0.483202	0.448586	0.428899	0.444057	0.412951	0.731775	0.740031	0.686574	0.542348	0.595746	0.459253	0.585002	0.533361	0.620226	0.546668	0.426351	0.483085	8.3219	0.435247	0.555847	1.94819	0.561859	3.76987	0.466711	3.15848	0.524043	0.410124	0.496273	0.572101	2.29394	0.607848
1579	40.4202	495.084			0.489959	0.322276	0.132507	0.849157	0.399439	1.2499	0.124971	1.00604	0.319727	1.00191	0.141585	1.03566	0.408413	0.88483	1.36433	1.27681	0.875196	0.658107	1.34921	1.10326	0.870936	0.719184	1.49069	0.969313	1.7186	1.61406	0.93969	0.753962	0.262055	0.755219	0.765921	0.121249	0.486373	2.94677	0.140736	0.446673	0.119021	2.76119	0.121363	1.30616	0.790333	1.71099	1.11766	0.165801	0.846378
1581	40.438	431.099			1.73194	1.76109	0.81049	0.476883	1.17421	0.482238	1.14234	0.524127	0.703456	0.476569	3.06602	0.602937	0.814438	0.513422	0.619028	0.657796	0.569112	0.617174	0.643809	0.32711	0.694921	1.58754	0.525059	0.524291	0.564419	0.511391	3.3412	2.12697	1.10126	0.639886	1.06838	0.710852	2.14729	0.510434	3.78833	0.741258	2.65653	0.57663	3.90157	0.510052	0.579053	0.567765	0.672129	1.9319	0.504541
1584	40.7812	551.177			1.22807	0.789285	0.459492	0.512571	0.483483	0.513652	0.710705	0.674881	0.539698	0.767566	0.890338	0.466874	0.522633	0.401886	0.464651	0.925964	0.43245	1.85872	0.45635	0.687942	0.652482	0.469598	1.25992	0.453671	0.459284	2.16942	3.90241	0.845022	0.466772	0.518618	0.479338	0.397285	1.54299	0.414102	0.487821	2.44926	0.49498	0.462319	1.45169	0.931223	0.684149	2.21932	1.02342	0.748332	0.453475
1589	41.3781	679.317			1.22786	2.4888	1.39857	0.387323	1.84448	0.363292	1.91963	0.347436	0.481245	0.314107	3.94508	0.384118	0.708746	0.374679	0.365763	0.365588	0.38447	0.341049	0.407239	0.262371	0.424787	2.47157	0.331843	0.348072	0.378358	0.395078	3.81296	2.05729	1.98747	0.36956	1.13937	3.45783	1.63117	0.327141	4.13886	0.576607	3.85731	0.396155	0.887629	0.307009	0.402945	0.366513	0.749535	2.73413	0.351599
1596	41.9732	417.11			0.367815	0.61604	0.156682	1.91753	0.687568	1.28663	0.210063	1.33435	0.845327	1.04553	0.160219	1.30584	0.790587	0.981909	0.95849	1.16656	1.27256	1.33193	1.21152	1.50709	1.29272	0.727908	1.43944	1.00372	0.871844	2.12073	0.459657	0.622785	0.475224	1.19232	0.882885	0.172978	0.657352	1.75739	0.201632	0.668763	0.192293	1.33544	0.145697	1.04038	0.672121	1.72238	0.715023	0.279042	1.26687
1598	42.1001	179.109			0.856864	1.54096	0.679819	1.37545	0.950242	1.15383	1.02166	1.0959	0.754413	0.897219	0.583108	1.05073	0.663273	0.928769	0.998732	1.19676	1.05677	1.0461	1.05595	1.18083	1.173	1.30895	1.22846	1.13423	0.793266	1.24976	1.83332	0.927499	0.7199	1.03496	0.848425	1.04176	1.06923	1.4237	0.782253	0.656139	0.767371	1.17755	0.932825	0.842801	0.565132	1.37626	1.01383	0.899796	0.970705
1613	42.5504	791.272			0.812606	2.38584	3.31936	0.371731	1.03242	0.369158	4.71477	0.379164	0.395794	0.372185	4.40177	0.453862	0.564056	0.393902	0.464672	0.446994	0.451533	0.465936	0.444594	0.435981	0.523136	1.59845	0.362178	0.385514	0.458073	0.359076	2.74636	1.39715	1.75168	0.453816	0.717198	3.64553	0.839397	0.390498	2.20096	0.424586	2.71296	0.448064	1.69986	0.38705	0.458782	0.459773	0.391448	2.19909	0.390295
1618	43.2902	688.287			1.00372	0.983732	0.924059	1.00526	1.06049	0.989366	1.0115	1.02575	0.969311	1.08145	1.02783	1.04547	0.970622	0.897994	1.03955	0.91585	0.99536	1.05952	1.04742	1.03812	1.02674	1.03783	0.984535	1.03031	0.954331	0.999325	0.965384	0.93794	1.09407	1.00049	0.971687	1.03958	1.03678	0.947919	1.02079	1.0137	1.11426	1.00455	0.914131	0.963459	1.01879	0.931022	1.11857	1.0244	1.03359
1623	43.6691	462.094			0.54255	0.448	0.272437	0.571919	0.230126	1.48079	0.184146	0.666286	0.787866	1.79711	0.14618	1.20305	0.222305	1.05882	0.60674	1.99196	2.62981	2.07042	1.7616	1.45132	0.824425	0.396308	1.98642	1.39905	0.487553	1.3239	0.439076	0.516728	0.495754	0.972002	0.272778	0.289078	0.353952	0.856788	0.18273	0.845573	0.147397	1.52754	0.282628	2.80145	0.457028	1.22142	0.720676	0.117149	0.732767
1630	43.9586	281.177			1.05741	2.63235	2.74007	0.448002	2.16222	0.398067	3.72155	0.405581	0.54202	0.405053	2.42669	0.381731	0.761419	0.431046	0.406272	0.394546	0.414682	0.415874	0.393691	0.363371	0.705619	2.41065	0.400348	0.442683	0.410808	0.437755	1.9871	2.12815	1.78593	0.41196	1.19763	3.03286	1.99052	0.416793	3.47177	0.541209	2.75091	0.422773	1.42112	0.40726	0.43549	0.391002	0.722004	2.40629	0.394385
1637	44.0301	827.29			0.245236	0.239233	0.246702	0.228666	0.991657	3.00882	1.02171	4.64156	0.232922	3.21113	0.983093	0.991614	1.05323	0.237094	0.969873	0.974419	1.01246	0.990356	1.06052	1.85605	0.652611	1.0192	0.371683	3.20021	0.912066	0.230826	0.232498	0.245098	0.238498	1.06038	1.06385	0.212245	1.01695	0.375091	0.984907	0.239275	0.980353	0.943124	0.232253	1.47357	1.00909	1.04985	0.227493	0.683268	2.09465
1639	44.3375	661.305			0.441654	4.61954	2.51118	0.363872	0.788978	0.373687	2.76524	0.366373	0.373636	0.369697	1.12481	0.744365	0.781136	0.343042	0.757453	0.80679	0.717743	0.769748	0.769298	0.760251	0.738086	0.83058	0.356553	0.36766	0.711753	0.365409	1.68907	0.638632	1.72243	0.761945	0.743965	5.14581	0.816287	0.368101	0.994972	0.348302	1.46233	0.772197	3.58857	0.332516	0.752291	0.707553	0.379776	1.77311	0.357371
1647	44.752	828.295			0.190288	0.208019	0.196729	0.198026	0.954041	3.08372	0.987944	4.73825	0.187901	3.42141	1.05926	1.00204	0.988471	0.190794	1.02636	1.07331	1.07098	0.981498	0.943173	2.04521	0.54312	0.964063	0.340952	3.13496	1.03329	0.191603	0.205036	0.204612	0.201856	1.06186	1.00526	0.179043	1.00676	0.319652	1.0247	0.19672	0.970459	1.03025	0.199164	1.62085	0.937548	1.04911	0.191933	0.55837	2.11731
1650	45.2221	489.198			0.935606	1.20243	0.664131	1.13261	1.07562	1.22005	1.20732	0.994468	0.846321	0.609544	0.377604	0.708308	0.915017	1.03002	0.932115	1.0058	1.28784	1.05792	0.873598	1.14793	1.18008	1.27003	1.26025	1.1694	1.01374	1.14699	1.17755	0.878835	0.805685	0.911155	1.36427	1.2678	0.881538	1.57202	0.707482	0.75067	0.624752	1.44844	1.25265	0.772314	0.395214	0.716965	0.634512	0.779556	0.899675
1660	45.6367	571.185			2.03048	2.29262	2.25231	0.540064	2.24853	0.332238	2.28819	0.350523	0.831201	0.328169	2.28233	0.312199	1.17809	0.511403	0.401775	0.306387	0.304954	0.292008	0.331459	0.249851	1.30047	2.9939	0.381852	0.341456	0.33349	0.644642	3.10943	2.65683	1.9464	0.394905	1.78694	1.57695	3.0738	0.391638	3.06702	0.81641	2.41383	0.312898	1.11356	0.316513	0.455028	0.339788	1.35609	1.85744	0.353622
1668	45.7993	532.145			0.794747	1.41385	2.64757	0.557257	1.2608	0.560687	3.37968	0.533335	0.574526	0.545211	2.27835	0.556787	0.549702	0.556303	0.568264	0.55978	0.521651	0.544981	0.537372	0.599575	0.591212	2.85592	0.616071	0.564845	0.556956	0.562064	1.64407	1.26191	0.969401	0.58877	0.559245	3.09427	1.16801	0.592064	3.27599	0.590703	3.08701	0.565543	2.90825	0.543098	0.563274	0.538149	0.591767	1.84909	0.541891
1677	47.0628	246.16			1.67218	3.1151	2.81009	0.353189	2.15997	0.297801	2.95508	0.290711	0.896146	0.290351	3.47777	0.302063	1.14276	0.380383	0.326888	0.306464	0.305407	0.30493	0.3184	0.324621	1.04362	3.77349	0.30732	0.295287	0.316337	0.374974	3.22333	2.40169	2.36311	0.311258	1.30305	1.86643	1.63994	0.302315	2.08993	0.60146	1.74304	0.302435	0.707718	0.291604	0.549213	0.366442	0.672	1.52929	0.286204
1703	47.2075	518.27			1.22847	4.43364	1.79928	1.35219	1.49779	0.226396	2.81125	0.231733	0.486002	0.235712	2.06456	0.548885	0.733607	0.441974	0.519779	0.523432	0.552559	0.539866	0.554145	0.350091	1.08713	3.20259	0.291859	0.243765	0.537261	1.40571	3.19915	1.86495	1.96727	0.544038	1.10928	2.2267	1.7961	0.302348	2.21403	0.892418	2.17466	0.552967	1.74152	0.233089	0.561629	0.558515	0.918574	1.91359	0.23271
1706	47.4773	407.043			1.33565	1.28034	3.85484	0.632273	0.586067	0.441738	2.03243	0.423703	0.440974	0.424052	4.21303	0.629489	0.884832	0.421224	0.625467	0.583155	0.681361	0.596007	0.638288	0.391987	0.402911	1.22695	0.446495	0.442879	0.640219	0.445102	1.65176	2.03762	1.62118	0.646312	0.614587	1.75896	1.0591	0.432328	3.76585	0.441859	2.77361	0.651344	1.86471	0.44401	0.614412	0.628687	0.460082	2.34403	0.450682
1711	47.8205	328.223			0.278703	0.850333	3.47978	0.37647	1.13326	0.306686	8.00114	0.282898	0.326055	0.324084	1.56169	0.276402	0.284068	0.313704	0.310271	0.271426	0.269864	0.24607	0.260186	0.261893	0.256337	0.821148	0.324962	0.297672	0.260572	0.303954	0.456006	0.944347	0.804026	0.264463	0.631963	8.57159	0.574716	0.328995	3.41846	0.48157	5.48272	0.282365	7.36098	0.296003	0.251995	0.274265	0.373041	4.07531	0.327706
1718	48.7963	500.259			0.92781	6.32811	2.00338	0.485634	1.00841	0.222189	2.36628	0.231361	0.496876	0.230454	2.28429	0.675051	0.781606	0.277378	0.697462	0.691329	0.705931	0.701004	0.657182	0.54001	0.863958	2.52269	0.237529	0.231047	0.749074	0.491436	3.33742	1.58496	2.39444	0.67224	2.07431	2.46837	1.49573	0.235991	0.982854	0.572046	1.9476	0.72294	1.19378	0.231669	0.704516	0.70774	0.354805	1.33578	0.230306
1728	49.6809	708.352			2.16607	2.91238	1.35707	0.788525	1.21173	0.340954	1.87892	0.335934	0.687444	0.308161	3.56714	0.358087	1.34649	0.564158	0.39202	0.399974	0.363843	0.414374	0.363971	0.328252	1.41447	2.9218	0.346208	0.326377	0.401248	0.69162	4.78155	3.00224	1.91254	0.422124	1.80647	0.885979	2.76579	0.353953	2.41456	0.789856	1.58454	0.366207	0.67141	0.350643	0.556166	0.411156	0.722944	1.39111	0.317249
1734	49.8059	629.117			0.905433	1.55176	0.646714	1.19141	0.932925	1.19953	1.11986	1.10853	0.832292	0.771407	0.437923	0.826029	0.559936	1.01304	1.02786	1.07314	1.38704	1.11004	0.806496	1.04375	1.28488	1.36109	1.32265	1.18109	0.599381	1.16095	1.2304	0.827121	0.645152	0.979047	1.10778	1.23738	1.07209	1.50866	0.791921	0.656692	0.494562	1.17553	1.06332	0.725928	0.428532	0.926045	0.886014	0.796899	0.928615
1738	50.2402	545.266			1.16521	0.866141	2.4611	0.422595	0.522502	0.47216	6.13529	0.47872	0.677478	0.495595	6.30794	0.286995	0.418067	0.852948	0.411943	0.262828	0.25321	0.252269	0.245198	0.26546	0.663086	0.672112	0.656714	0.447523	0.339616	0.734043	1.20093	2.88746	3.5135	0.427145	6.78635	1.51465	2.59617	0.466627	1.03797	0.65403	4.92525	0.278481	0.534876	0.466523	0.337184	0.384117	0.768886	1.07711	0.419123
1742	50.4565	722.261			0.693506	1.02552	1.35703	1.9462	0.992029	0.826923	0.997439	2.3075	0.993625	0.515881	1.04134	0.979108	0.987238	0.891784	0.985002	1.03502	0.985403	1.04543	1.01059	0.971417	1.03754	0.954221	0.718866	0.885777	1.03389	0.445626	0.501167	0.612081	0.573896	1.00407	0.982064	0.598223	0.985014	1.24937	1.00516	0.440164	0.978706	1.02379	0.677792	0.374955	1.00435	0.96369	0.97265	0.964693	2.21056
1756	50.5279	735.344			1.53614	3.82751	2.42146	0.377207	2.26058	0.230193	1.77167	0.234509	1.1526	0.235278	4.53299	0.321002	1.03436	0.724058	0.39102	0.325607	0.3252	0.313849	0.387266	0.263069	1.15064	4.09892	0.252433	0.226761	0.440376	0.356662	4.7661	3.02919	1.86281	0.355655	1.25229	1.13867	2.03975	0.287168	2.37116	0.561373	1.71068	0.331361	0.591794	0.250143	0.632925	0.614442	0.534013	1.44556	0.241686
1769	50.7084	1004.37			0.410284	0.418587	0.398674	0.573267	0.986625	1.3519	0.981917	3.86001	0.505012	0.812093	0.975371	1.04728	1.00192	0.894191	0.993102	1.00166	0.989929	1.01498	1.00954	1.00558	1.01095	0.959509	1.3365	1.80203	1.00113	0.550909	0.394845	0.386971	0.392073	1.04126	1.02223	0.40877	0.970197	1.73037	1.04543	0.40418	1.01275	0.981048	0.398462	0.46281	1.01901	0.98792	0.477566	0.978895	2.67538
1773	50.7817	502.274			1.32372	1.13356	0.589477	2.52542	1.52681	0.404347	1.48841	0.360589	1.19713	0.408764	2.20075	0.66764	1.35001	1.92402	1.06047	0.620218	0.643793	0.499219	0.695575	0.499294	2.40198	1.37057	1.19863	0.544124	0.742416	2.23899	1.79622	1.64362	1.36615	0.945919	3.02699	0.772333	2.1781	1.32593	0.716313	1.19812	1.12586	0.451461	0.569693	0.427931	0.722954	0.651747	1.67633	0.709628	0.516771
1790	50.871	1008.36			0.385433	0.428994	0.399813	1.13354	0.879566	1.40594	0.847593	2.54368	0.59468	1.20184	0.811518	1.24898	0.807611	0.862495	1.05724	0.843686	1.00459	1.13902	1.0052	1.48381	0.882863	0.927233	1.1088	1.47924	0.926932	0.796372	0.641018	0.489063	0.39963	1.27572	0.918575	0.397025	0.841378	1.36917	0.851447	0.437702	0.845055	1.34404	0.379785	0.866456	0.889028	1.02563	0.54555	0.77529	2.3687
1800	50.9979	307.193			0.509204	1.24642	3.50093	0.562885	1.2544	0.747727	6.15075	0.448864	0.677561	0.431512	1.21941	0.539861	0.919243	0.579361	0.555551	0.561661	0.516904	0.574844	0.579691	0.652224	0.712365	0.615912	0.642289	0.663643	0.564092	0.530575	0.910902	1.13114	0.980695	0.580406	0.912225	5.00058	0.555419	0.595994	2.15965	0.751136	3.03177	0.530083	3.232	0.442583	0.509348	0.536634	0.482744	2.61422	0.459592
1806	51.0158	691.354			1.71528	1.98286	0.957138	2.4558	1.85504	0.320475	1.25512	0.307972	1.7022	0.293746	0.706322	0.497665	1.75642	1.66693	1.05787	0.462339	0.36547	0.404131	0.62755	0.365874	2.78186	1.8467	0.858534	0.262176	0.684523	2.06424	3.32092	1.9873	1.37963	1.10042	2.07001	0.942111	2.18101	0.867749	0.934158	1.32779	0.835489	0.519503	0.565035	0.254625	0.975917	0.71774	1.81699	1.01241	0.404518
1810	51.0336	1006.36			0.368821	0.429173	0.299164	1.22256	0.95933	1.27894	0.879427	2.99024	0.716291	1.2436	0.892073	1.26507	0.877732	0.976654	1.09322	0.892963	0.88748	0.892321	0.946889	1.48115	0.796465	0.908296	1.15234	1.47806	1.06798	0.638133	0.321922	0.299981	0.279467	1.26543	0.942177	0.301251	0.903847	1.53148	0.908678	0.400632	0.902381	1.13625	0.303828	0.68132	0.892474	0.916266	0.756044	0.720212	2.77913
1812	51.0336	1130.53			0.93505	1.21034	0.809384	1.04916	1.2973	0.651943	0.466494	0.68409	1.25304	0.708503	0.425169	1.28603	1.58344	1.5735	1.22019	0.403834	0.781488	0.750481	0.57792	0.850321	1.7661	1.58007	1.5357	0.631776	0.42638	1.579	1.18445	1.31074	0.837617	2.13199	1.76954	0.899038	1.64473	1.14069	0.432942	1.18947	0.443332	1.6979	0.792652	0.87297	0.89368	0.492558	1.43095	0.798872	0.748532
1829	51.1249	567.236			0.446503	0.497705	0.386631	0.715488	0.596404	1.9422	0.481279	2.76248	0.541282	1.73541	0.598693	1.93246	0.602413	0.804273	0.540133	0.782859	0.591288	0.828079	1.21125	1.29766	0.897246	0.452763	0.967252	1.56665	2.8855	0.699938	0.609861	0.477673	0.484028	0.926367	0.644462	0.457787	0.468429	0.726498	0.436586	0.511077	0.444577	1.47414	0.435929	1.03206	0.44923	0.854355	0.567598	0.837081	1.58948
1835	51.1606	721.365			2.49204	2.2821	0.500256	1.71862	1.26827	0.327409	0.717734	0.299922	1.87293	0.313844	2.84761	0.537229	1.31339	0.983185	0.600833	0.558716	0.531912	0.521595	0.565723	0.720462	2.58884	3.56187	0.687961	0.307162	0.666285	2.12779	4.08812	1.08639	1.57012	0.653889	1.54735	0.435947	1.6882	1.11538	0.793306	1.15149	0.7443	0.522537	0.527044	0.409325	1.56369	0.824064	1.84496	0.74264	0.312818
1850	51.2141	763.216			1.35203	4.04427	0.320006	0.60312	0.978708	3.60115	0.985609	6.29236	0.344675	2.13227	1.00106	0.994005	1.0544	0.318574	0.991025	1.00213	0.950831	0.964328	0.989448	0.96332	0.965127	1.00502	1.20627	0.415855	0.99734	0.313715	0.305566	0.618072	0.319543	1.0213	1.07122	0.313838	1.01003	0.337724	1.02375	0.320121	1.04717	0.98447	0.341969	1.55079	0.903818	0.987244	0.334868	1.03831	0.510247
1852	51.2141	1112.52			0.967401	1.86126	0.689858	0.956156	1.56567	0.653583	0.367845	0.624206	1.52474	0.655065	0.5871	0.954503	2.16073	1.15561	1.17953	0.353618	0.466146	0.57595	0.401043	0.930497	1.46636	2.29172	1.09491	0.663499	0.364554	1.80221	1.82738	1.23956	0.979436	1.3546	1.82643	0.672466	1.74132	1.19016	0.39805	1.11938	0.357469	1.06122	0.619071	0.803415	1.07059	0.536434	1.18842	0.72967	0.656004
1873	51.3053	715.119			0.845335	1.24782	1.3441	0.896144	1.00543	0.767185	1.00238	0.966333	1.06467	0.918543	0.783549	1.06015	0.914895	0.941195	0.99395	0.951539	0.990081	1.05513	1.23499	1.1188	1.40267	1.40315	0.948015	0.822198	0.957123	0.853997	1.20103	1.1998	0.951328	0.883809	1.06006	1.14819	1.03001	1.16565	0.858358	0.776193	0.743897	1.06821	0.853838	0.723794	0.705173	1.19773	0.961461	0.834583	1.41152
1877	51.3053	944.348			0.547376	0.486546	0.319141	0.978084	0.746467	1.20684	0.721606	2.36297	0.884845	0.83817	0.737574	1.72903	0.776675	0.88793	1.05852	0.761142	0.868086	1.40322	0.899272	1.44217	0.86998	0.86649	1.30742	1.1848	0.851321	0.901106	0.377675	0.334761	0.351653	1.73883	0.886822	0.34285	0.775627	1.74238	0.715987	0.394712	0.705764	1.69072	0.309763	0.92342	0.829409	0.930099	0.85103	0.831233	2.53503
1904	51.4125	342.238			0.772628	1.09773	2.29618	0.741895	0.979589	0.587767	4.25653	0.682871	0.713601	0.71037	1.67885	0.674164	0.53684	0.733792	0.601794	0.574113	0.731221	0.5954	0.726057	0.616503	0.858639	1.12334	0.641156	0.61444	0.770487	0.919519	0.817837	1.26341	1.11238	0.736745	1.45092	4.29847	0.812662	0.706055	1.71159	0.623582	2.98292	0.696455	2.53537	0.659753	0.499253	0.590306	0.905807	1.96983	0.867792
1906	51.4125	506.264			1.96166	0.679302	1.36254	0.541283	0.949848	0.558157	3.04884	0.691186	0.53062	0.544221	0.782388	0.551219	0.426269	0.583699	0.414539	0.404044	2.21978	0.434225	0.547081	0.805348	0.965347	0.98186	0.537814	0.620369	0.587866	0.716537	0.526154	4.08917	0.689279	2.5035	1.30579	1.83334	0.505184	0.52331	0.600924	0.524146	1.22349	0.950031	1.26075	0.698855	0.365692	0.778222	1.89032	1.50045	0.789748
1914	51.4304	875.493			0.385484	0.692164	0.525604	0.546089	1.23299	0.748682	0.353406	0.828589	0.524632	0.759357	0.394843	2.50338	0.418779	0.93107	2.20773	0.37345	0.36589	1.11738	0.365309	2.36232	1.02897	1.09366	1.06742	0.761001	0.379712	0.95845	0.714885	0.551362	0.48504	3.59109	1.14652	0.372489	1.05087	2.43879	0.347908	0.451938	0.345037	1.43299	0.344947	0.948298	0.789273	0.392981	0.553426	0.443354	1.58326
1916	51.4304	974.327			0.489326	0.549777	0.377548	0.673678	1.02065	1.52244	0.701489	2.25738	0.581747	1.55912	0.714077	1.30517	0.674057	0.649303	1.04883	0.813996	0.822364	1.00755	0.792023	1.60285	0.794336	1.01075	0.795932	1.47654	0.856152	0.760712	0.764436	0.391975	0.401361	1.38799	0.959723	0.339798	0.854946	1.4001	0.684347	0.417213	0.707065	1.63413	0.417288	0.950678	0.770842	0.941747	0.621369	0.619931	2.26404
1920	51.4304	1094.52			0.851804	1.12045	0.988071	1.06003	1.41184	0.683485	0.794957	0.717943	1.46117	0.647393	0.441572	0.894301	1.87409	0.880314	0.984399	0.493141	0.783632	0.707174	0.464483	1.10268	1.62048	2.24887	1.08939	0.695768	0.463869	1.04985	1.4044	1.83362	0.855527	1.53914	1.77004	0.725995	1.15537	1.23445	0.577642	0.93183	0.506606	1.05137	0.67444	0.857875	0.775106	0.674637	1.05334	0.707146	0.876146
1933	51.5215	474.214			0.734797	0.880409	0.838183	0.796659	0.892872	1.29282	1.69248	0.935857	0.695242	0.550252	0.527749	0.842313	1.0141	1.1139	0.963226	0.676917	1.33514	1.6134	1.1216	1.71345	1.35394	0.864458	1.25615	0.978081	0.899017	0.746098	0.610949	0.881446	0.926568	0.628886	1.00433	1.5185	0.650365	1.50993	0.62643	0.946281	0.523959	0.775817	1.45791	0.638101	0.655921	1.10205	0.782151	0.585207	1.05096
1939	51.5394	606.121			1.09824	1.57556	0.916718	0.552333	1.03661	0.574028	5.00382	0.586064	0.563878	0.547369	0.715496	0.43999	0.668729	0.527647	0.459423	0.460275	2.44673	1.12329	0.400045	0.572755	0.626959	5.45687	0.550081	0.52102	0.458795	0.539182	1.02097	1.06977	1.57233	0.542095	0.552295	2.92794	1.51397	0.545387	1.4036	0.57586	1.34737	0.430426	3.868	0.640054	0.513845	0.498744	0.797967	2.27609	0.591385
1953	51.6109	858.479			0.830846	1.51538	0.624986	2.15355	1.8482	0.553543	0.584213	0.467763	1.19658	0.420433	0.761617	0.855767	1.31104	1.49272	0.946663	0.464698	0.497439	0.646554	0.586342	1.0041	2.24903	1.29048	1.30743	0.470197	0.505439	1.39158	1.91335	1.43609	0.640829	1.46477	1.709	0.490368	0.643851	1.68961	0.584861	0.706416	0.612469	1.13442	0.509719	0.535274	1.08752	0.646197	1.04724	0.49543	0.574746
1955	51.6287	536.206			0.464786	0.759378	0.338949	0.93475	1.0415	1.78886	1.06314	2.76351	0.491894	1.43894	0.952637	0.943429	0.938283	0.525513	0.929421	0.876843	0.976567	0.938957	0.937139	1.62459	1.00783	1.08097	0.82702	1.96337	0.987348	0.633801	0.564437	0.409904	0.36439	0.94667	1.05204	0.515579	0.905436	0.895708	0.929076	0.409806	0.920572	0.947616	0.431114	0.96665	0.895446	0.965781	0.488722	0.682282	2.1107
1971	51.6663	693.335			1.70154	2.41947	1.52954	1.11711	1.38925	0.434435	1.10406	0.417909	1.67762	0.399439	1.94413	0.42216	1.73269	0.660567	0.973252	0.849816	0.369715	0.341749	0.41973	0.476063	2.26077	1.94908	0.677938	0.490465	0.444465	1.01158	3.27084	2.05367	1.42426	0.734774	3.53152	0.781708	1.48745	0.706193	0.805464	1.4847	0.676168	0.574191	0.818234	0.51643	1.14471	0.426841	1.69913	0.789511	0.513286
1977	51.6842	486.214			0.586109	0.919796	0.628982	0.778793	0.670556	1.71979	0.833324	1.35503	0.702157	1.03452	0.458183	0.80692	1.09366	0.903342	0.755188	1.04243	1.36672	1.77884	1.23124	1.7664	1.17341	0.573778	1.34295	1.11201	0.77809	0.843425	0.567284	0.664307	0.591926	0.633812	0.891953	1.22093	0.479468	1.43456	0.480687	0.824613	0.472417	1.08478	0.613083	1.03969	0.576075	1.2419	0.640075	0.383319	1.07662
1997	51.7556	1032.51			0.482612	0.489704	0.326946	0.65173	0.690889	3.27936	0.631095	1.97024	0.430454	2.74788	0.511059	1.14587	0.530961	0.931982	0.72935	1.31015	1.47064	1.32299	1.34589	1.81613	0.447336	0.938671	0.912918	1.13738	0.853541	0.869984	0.674331	0.479786	0.409563	0.88008	0.529686	0.389591	0.874763	0.516284	0.610538	0.384932	0.502531	1.49804	0.48407	1.74738	0.726216	1.66275	0.907221	0.315937	1.69033
2002	51.7735	647.328			1.97977	2.7615	1.29316	1.14761	1.11399	0.414938	0.967407	0.48907	1.43023	0.319682	3.16297	0.315757	1.5002	0.595034	0.697059	0.745488	0.345013	0.358012	0.454585	0.320198	1.62644	2.20419	0.631334	0.401798	0.487438	0.963151	2.19452	2.14505	2.09008	0.499762	3.81178	1.00582	2.3457	0.604435	1.11822	1.77445	0.940942	0.334455	1.04137	0.59645	1.00708	0.464019	1.49153	1.1178	0.482279
2005	51.7735	849.478			3.76718	0.37292	0.284979	1.24606	1.9418	1.13077	0.579025	0.576819	0.436782	0.305718	0.489579	0.688689	0.401068	0.415219	0.55223	0.916626	0.615135	0.558531	0.327732	3.06901	0.578596	0.387662	2.39691	0.302145	0.315927	0.607271	0.341638	2.74498	0.424796	0.774554	0.972371	0.306225	7.72332	0.627463	0.357649	0.3713	0.319053	2.53177	0.446115	0.898599	0.339449	0.506635	0.513952	0.573862	0.329042
2013	51.8092	560.076			0.697093	0.624982	0.418688	0.585712	0.35466	1.48863	0.283678	0.885158	0.804131	1.81584	0.258363	1.23527	0.340629	0.915573	0.86184	1.8935	1.81958	1.62974	1.86319	1.43532	1.03193	0.631059	1.18894	1.31396	0.939497	1.04267	0.697198	0.777129	0.780303	1.0497	0.327145	0.468364	0.599844	0.942885	0.323495	1.03631	0.233056	1.36755	0.427012	2.2234	0.596964	1.25785	0.770361	0.373894	0.955041
2015	51.8092	827.49			0.835126	0.307277	0.210958	1.67802	1.40558	0.827232	0.197868	0.270162	0.591886	0.233289	0.187452	2.2655	0.792729	1.63861	1.81795	0.356451	0.439866	1.55785	0.984113	2.04127	1.7283	0.261404	2.07554	0.582628	0.423998	2.13624	0.32628	0.685669	0.207956	2.65096	0.816727	0.217936	1.59671	2.36444	0.188126	0.52949	0.242686	2.69915	0.194882	1.09236	0.403096	0.781399	0.468006	0.319955	1.03036
2017	51.8468	343.24			0.839819	2.08195	3.08914	0.352177	1.50776	0.8289	5.55447	1.17826	0.922982	0.353038	1.74059	0.339904	0.492865	0.335054	0.33561	0.50919	0.852465	0.37571	0.357138	0.443902	0.500255	1.687	0.337941	0.346471	0.332076	0.334474	1.6444	1.71704	1.17866	0.363798	0.94326	4.60113	0.99155	0.363981	2.16149	0.593001	3.77773	0.310672	2.8476	1.06136	0.396224	0.474042	0.420394	3.20782	0.357703
2036	51.9361	855.483			1.23274	3.17611	0.76381	1.67054	1.293	1.49829	1.42306	1.90047	1.45853	0.885931	0.519487	0.846476	0.873785	1.02787	0.777039	1.14511	1.53508	0.627776	0.483974	1.06668	2.23376	1.30956	1.74039	0.363429	0.275803	1.14156	1.73462	1.31656	1.02177	1.42335	1.6948	0.491309	0.939581	1.21187	0.31535	0.798053	0.299804	0.776954	0.404758	0.522079	0.589705	0.906819	0.787994	0.695092	0.412539
2042	51.954	844.483			0.446521	0.825264	0.66258	0.578352	0.961515	0.580347	0.65538	0.471455	0.567118	0.435454	0.755292	1.40001	0.570445	1.47762	0.95272	0.646037	0.575692	1.14354	0.695812	2.86049	0.58476	0.62056	1.86011	0.513526	0.590345	0.594844	0.346967	0.47259	0.488866	1.22468	0.717716	0.310248	0.627419	1.9907	0.58866	0.811324	0.600342	1.84031	0.274294	1.37162	0.699774	0.622929	0.338244	0.361469	1.66797
2065	52.0809	683.331			0.293729	0.410412	0.290053	0.655458	0.629301	1.66554	0.445181	1.5889	0.334353	1.22817	0.465098	2.31677	0.493389	0.81808	0.880509	0.628873	0.730727	2.40158	0.717492	2.32228	0.729026	0.509983	1.10642	1.32718	0.59536	0.758083	0.48874	0.309907	0.341223	2.34575	0.570882	0.295413	0.472261	1.24314	0.44012	0.368993	0.444047	3.97657	0.289947	1.71517	0.576028	1.05968	0.431944	0.486748	2.71536
2067	52.0809	1001.56			0.325664	0.672424	0.312231	1.88818	1.04022	1.21739	0.438269	0.661671	0.634819	0.677719	0.499201	1.63253	0.659967	1.51399	1.42433	0.577579	0.684435	1.42319	0.757219	1.93258	1.50455	0.67523	1.65955	0.623836	0.589394	2.28125	1.17201	0.510012	0.424844	2.25079	1.21263	0.301327	0.794347	2.07337	0.474434	0.537717	0.453672	2.29358	0.308699	0.93427	0.672573	1.32087	0.830969	0.43751	1.18937
2077	52.1345	651.351			1.01793	1.37995	0.748929	1.15272	0.350636	0.57166	0.518187	0.422221	0.80006	0.286735	4.01533	0.228838	0.767871	0.566385	1.25014	0.546933	0.206357	0.332071	0.830744	0.384695	1.33792	0.745044	0.891135	0.510506	0.327151	1.14006	0.823684	0.989667	1.8618	0.379234	7.87179	0.344459	1.84855	1.03725	0.296471	4.34079	0.447877	0.265576	0.329904	2.278	0.83544	0.326091	0.516958	0.694598	1.05409
2091	52.2078	602.328			1.09593	0.84057	1.64324	0.713997	1.18445	0.817184	1.27091	1.21523	0.763934	1.41965	0.651598	0.878268	0.921925	0.783371	1.17566	1.36037	1.19322	1.25468	1.4501	0.895077	0.836361	1.13451	0.906752	1.16782	1.04125	0.757849	0.651228	0.907866	0.690097	0.829883	0.709178	1.06685	0.818684	0.997358	0.990891	1.00448	0.881595	1.19062	0.944992	0.830475	0.858542	1.10453	1.20553	0.923065	1.29258
2101	52.2435	1043.54			1.38602	3.78306	1.60505	0.806399	2.50368	0.26775	1.5474	0.375856	1.52565	0.449598	2.1841	0.389515	1.52522	0.599914	0.670307	0.36433	0.263248	0.400685	0.266323	0.361703	1.75176	3.02138	0.538075	0.169679	0.26157	1.0088	4.06966	2.46079	1.6629	0.775821	1.93658	1.18233	1.53079	0.725802	1.02527	1.01214	0.888794	0.477989	0.41046	0.364458	0.627711	0.315111	0.770221	1.03448	0.29274
2110	52.2971	621.276			0.710978	1.07292	0.228737	0.401913	0.836993	1.62712	1.62581	2.41391	0.933941	2.627	1.17341	0.964648	0.976655	1.07249	0.938672	0.886495	0.931331	0.976067	0.930151	1.25341	1.17739	0.96646	0.822109	1.67388	0.86329	0.810672	0.481352	0.325031	0.465382	0.956536	0.845365	0.275034	0.886694	1.0067	1.21529	0.264834	1.32156	1.15432	1.04712	1.06504	0.934085	0.911212	0.915617	1.06111	1.67407
2126	52.4419	345.173			0.353477	0.939999	0.610768	0.704692	0.599002	1.43209	0.757556	0.743375	0.402071	0.763978	0.469406	1.26546	1.20078	0.903683	1.24758	0.981398	1.11066	2.00178	1.26646	1.53422	1.59896	0.61159	1.25281	1.12801	1.05661	1.36653	0.6145	0.69087	0.692636	0.951621	1.06882	1.14612	0.532425	1.92487	0.4815	0.870041	0.426955	1.29445	0.730583	0.690268	0.485606	1.2599	0.58767	0.305512	1.46788
2141	52.4776	721.366			1.91238	2.85967	1.12306	1.58165	1.44073	0.385161	0.563224	0.466659	1.63291	0.532651	1.4396	0.377607	1.41225	0.844229	0.919075	1.57949	0.437268	0.576874	0.418225	0.366613	1.97722	2.50717	0.577993	0.434257	0.509442	0.952282	1.94407	2.39443	1.97313	0.624802	2.14675	0.693945	2.18852	0.626808	0.934224	1.50184	0.558743	0.407242	0.746959	0.570686	0.949844	0.605298	1.73847	0.962111	0.558543
2147	52.4955	887.495			0.345789	0.371782	0.230121	0.866827	0.228505	0.706145	0.252976	0.256471	0.384472	0.416902	0.252642	2.3993	0.53329	2.5736	1.83072	0.323302	1.1477	1.68864	0.997419	3.15026	0.745407	0.377198	1.8904	0.292556	0.701622	2.61275	0.261811	0.266578	0.228672	3.4043	0.614198	0.270365	0.645653	2.65371	0.215795	0.415351	0.265033	2.43531	0.229861	0.88331	0.384595	0.948397	0.452464	0.48108	1.0466
2163	52.5688	533.29			1.58675	1.79245	0.683654	1.6139	0.781708	0.567295	0.216358	0.589675	1.32838	0.742607	0.462215	0.432636	1.4211	0.88996	1.28542	2.99713	0.77536	0.925385	0.587242	0.530223	2.2212	1.42903	0.818619	0.76019	0.854427	1.26064	1.19224	1.47312	1.31414	0.83678	1.73683	0.438667	1.49727	0.895586	0.313237	1.74661	0.257397	0.369567	0.453262	0.844617	0.840632	0.667402	1.73663	0.436991	0.990783
2171	52.5867	854.461			1.6543	3.06419	1.25009	1.21478	2.39075	0.252231	0.533729	0.266101	2.49687	0.277786	1.25186	0.46691	1.75387	0.910677	0.831683	1.02039	0.341827	0.335333	0.280596	0.359154	2.48587	2.59479	0.581059	0.279028	0.32769	1.05056	3.67007	3.22231	1.56415	0.496691	2.41433	0.721695	1.72899	0.78033	0.600636	1.22583	0.45637	0.320555	0.341941	0.279145	0.901199	0.476989	1.39425	0.631864	0.316834
2177	52.6224	857.487			0.317247	0.492354	0.36447	0.415248	0.405951	0.529372	0.438368	0.361806	0.3218	0.293359	0.382671	1.95506	0.576388	2.60589	1.99103	0.49421	0.687086	1.3294	0.577549	2.53694	0.650417	0.469524	1.77366	0.43785	0.575331	1.14925	0.325985	0.372182	0.326403	2.92631	0.582806	0.340496	0.601733	2.49045	0.39965	0.371156	0.419849	2.10522	0.307197	0.636588	0.542183	0.737028	0.341951	0.355327	0.826791
2197	52.785	942.476			1.86686	3.21268	1.26804	0.992764	2.6204	0.27757	0.735954	0.277768	2.10623	0.291019	0.981839	0.731717	2.32799	1.77464	0.425215	0.452324	0.36624	0.420944	0.389574	0.670882	2.17251	1.75093	0.393242	0.278678	0.331229	1.27275	2.41171	3.19814	2.10176	0.454486	2.12911	0.28835	1.35932	1.40665	0.525957	1.01903	0.343464	0.362676	0.378217	0.406697	0.832418	0.963221	1.00812	0.656634	0.383607
2198	52.785	1015.56			0.729724	1.0963	0.326562	1.3293	1.19375	0.639569	0.525911	0.737359	0.64853	1.05274	0.492641	2.00032	0.731979	1.15073	1.86145	0.530628	0.566316	1.41016	0.768095	1.20202	1.62176	0.968226	1.37805	0.551078	0.484143	2.24468	0.878117	0.833905	0.527952	2.80294	0.697734	0.3411	0.528721	3.15475	0.505663	0.36995	0.52322	2.016	0.320837	0.954321	0.512547	0.667768	0.405365	0.701754	0.712684
2205	52.8743	502.294			0.805889	0.872936	0.96816	0.784048	0.432373	1.1823	0.443673	1.18169	0.77829	2.32668	0.773727	0.552386	0.61095	0.808927	0.863532	3.51775	1.09151	1.04169	0.640319	0.809085	0.959521	0.573864	0.809623	1.01497	1.41175	0.999896	0.751941	0.915715	0.990791	0.707093	1.14987	0.829774	0.625878	0.783361	0.498421	1.20061	0.480358	0.882842	1.04433	1.14735	0.725193	0.693083	0.915204	1.01266	1.11249
2208	52.8743	953.515			2.23713	2.75219	1.13767	0.253348	1.81771	0.243258	0.289975	0.245504	1.67268	0.250842	1.69344	0.302178	2.83775	0.356479	0.25835	0.258224	0.271456	0.265321	0.270976	0.718519	3.085	2.08844	0.241142	0.256086	0.261442	0.382149	6.08675	3.47014	1.77224	0.330455	3.11226	0.688631	1.40127	0.354759	0.61666	0.929135	0.556847	0.27795	0.240148	0.262938	1.83155	0.302356	1.20023	0.547172	0.253638
2211	52.8743	1112.57			0.736727	0.478017	0.552744	0.915651	0.324688	0.604817	0.342856	0.613179	1.3045	0.675011	0.310781	1.14674	1.76076	1.27317	1.73865	0.593729	0.78309	0.8006	0.826214	1.61754	1.96028	0.342652	0.982991	0.663182	0.401683	1.0145	0.651423	0.512636	0.512458	2.08192	0.901759	0.515401	1.09444	0.97931	0.302733	0.498111	0.312607	2.31002	0.493537	0.646597	1.21922	0.741853	0.763903	0.372699	1.68391
2217	52.9298	310.211			0.532915	1.30028	4.18224	0.35319	1.10781	0.362896	6.52273	0.350516	0.374197	0.380108	1.37734	0.358232	0.54096	0.352965	0.348644	0.338516	0.355945	0.318916	0.379873	0.248498	0.409598	1.05359	0.372332	0.359299	0.364098	0.357477	0.557177	1.11596	0.889008	0.350645	0.691621	6.51418	1.23325	0.34913	4.11388	0.506355	5.31946	0.337197	5.80581	0.372198	0.316559	0.361791	0.504227	3.74069	0.355966
2222	52.9834	840.486			0.757178	1.00031	0.250168	1.90359	0.730764	0.285779	0.148426	0.404442	1.54631	0.258951	0.141665	1.83408	0.656213	1.52714	1.11453	0.425949	0.480584	1.72859	0.382789	1.61775	2.09589	0.636009	1.91622	0.408166	0.134795	2.03142	1.53863	0.505105	0.335138	2.83489	1.16981	0.18318	0.931829	2.44897	0.129738	0.298159	0.140666	2.33525	0.166526	0.351586	0.845663	0.628612	0.555079	0.278359	0.327012
2231	53.1103	897.486			0.331704	0.38577	0.362104	1.53683	0.726085	0.479503	0.510753	0.409034	0.430929	0.353113	0.690761	2.39837	0.712288	1.75132	1.33916	0.511849	0.674704	1.50862	0.626023	3.01557	0.692707	0.651505	2.45529	0.456227	0.503695	1.74212	0.844458	0.387202	0.39007	2.27309	0.755104	0.342603	0.725211	2.81824	0.513977	0.385052	0.485669	2.23279	0.343226	0.905096	0.695132	0.900188	0.467668	0.509792	0.977713
2250	53.1817	935.505			1.85773	4.0012	1.59602	0.61215	2.35272	0.275635	1.13294	0.2292	1.6533	0.21552	3.3329	0.41249	0.844298	0.423596	0.561155	0.31339	0.381353	0.349439	0.445289	0.521486	1.01555	3.72683	0.41111	0.214645	0.332832	0.668471	4.78031	2.65426	1.86246	0.625993	1.14196	0.603744	1.28619	0.449079	1.02968	0.589986	0.941386	0.392321	0.223786	0.263132	1.04963	0.520633	0.404518	1.17955	0.224368
2272	53.3087	251.203			1.30036	1.34835	0.997159	1.0334	0.432092	0.56156	0.820427	0.431489	1.15497	0.493252	3.47083	0.252747	1.04588	0.692769	1.0562	0.695417	0.273561	0.371009	0.569792	0.258634	1.5341	1.19518	0.812937	0.526466	0.379234	1.09529	1.08216	1.38453	1.48156	0.443003	6.35924	0.371534	2.09281	0.625373	0.269836	3.59834	0.604241	0.257169	0.47669	1.93235	0.719179	0.392476	0.824271	0.763119	0.901883
2275	53.3265	910.343			0.480931	0.305592	0.0935876	0.778246	0.770506	1.14331	0.760229	2.35922	0.792589	1.85897	0.833883	2.48248	0.854472	1.0786	0.871871	0.75891	0.841515	0.824357	0.745038	1.25679	1.47209	0.828688	0.966723	0.879148	0.826074	0.631826	0.299118	0.253789	0.178228	0.757645	0.755417	0.0961973	0.799147	0.944159	0.84105	0.495657	0.773449	3.75893	0.09513	1.07658	0.794733	0.826023	1.05941	0.305956	3.66413
2285	53.507	504.31			0.720947	0.794552	1.46002	0.729612	0.483131	0.588017	0.654462	0.610478	0.581882	4.01005	0.773297	0.366293	0.629965	0.596215	0.991577	3.48723	0.714089	0.596465	0.357769	0.398496	0.779006	0.456918	0.90524	0.586177	1.67828	0.887225	1.28327	1.78536	1.03108	0.66291	0.725544	1.03567	0.951233	0.60793	0.647567	0.611456	0.75038	0.639857	0.897998	0.800247	0.849129	0.741285	0.931817	2.48539	0.644261
2294	53.5963	753.406			0.188469	0.365711	0.209606	1.00112	0.145223	0.53816	0.143017	0.467577	0.198279	0.52986	0.220842	3.13498	0.166924	1.63378	1.43837	0.132329	0.355222	2.80997	0.838882	3.94697	0.532539	0.165462	1.78944	0.474317	0.314339	1.67274	0.526518	0.153315	0.164104	2.74373	0.326917	0.096311	0.142809	2.55972	0.134235	0.133658	0.161303	4.17498	0.197638	1.45369	0.181633	0.843561	0.183203	0.141261	1.7643
2297	53.6142	778.481			0.21954	0.223365	0.204769	0.294809	0.258869	0.22911	0.282274	1.53053	0.187156	0.253278	1.10522	0.669714	0.268031	0.385945	0.417856	0.250602	0.269393	6.63474	0.340179	1.27824	1.8374	0.265691	0.831038	0.236207	0.300854	1.57337	4.83007	0.680171	0.192551	2.53599	0.26134	0.60255	0.231825	0.475429	0.276959	1.32566	0.237785	2.96086	5.23586	0.357421	0.331171	0.35608	0.219385	0.965597	0.398374
2300	53.6518	805.459			2.14066	0.833853	0.341073	0.0547375	0.494097	0.152835	6.73178	2.40642	1.64266	0.0516168	1.52143	0.094512	0.0897677	0.300808	2.62892	0.0864919	6.0388	1.46928	0.100223	0.081189	3.0067	0.313728	0.735513	5.01981	0.0894068	0.0552074	0.805399	1.04562	0.864233	0.0907062	5.02711	0.0514133	0.614507	0.0555266	0.0904395	0.501474	0.0945523	0.944301	2.27709	0.186051	0.0978411	0.096199	0.637554	0.0919338	2.35431
2306	53.7053	967.527			2.02254	0.437955	0.434386	0.981055	4.51062	1.13774	0.636986	0.293413	0.289086	0.27243	1.0128	0.815622	1.2377	0.273259	0.594277	0.657487	0.591972	0.662554	0.600943	4.14858	0.267591	0.646437	1.48704	0.296201	0.617428	0.486567	0.416671	3.74092	0.377372	0.633376	1.84471	0.360295	0.676271	1.399	0.640098	0.316263	0.771987	0.581911	0.282553	0.484691	0.622094	0.602113	0.307136	0.176986	0.575222
2321	53.868	700.383			2.08341	1.55942	3.07583	1.27526	1.85587	0.199154	1.99411	0.147824	1.32533	0.208731	3.23766	0.199799	1.57307	0.550414	0.515826	0.427252	0.179491	0.209472	0.174745	0.468407	0.7994	1.41675	0.21068	0.141863	0.265859	0.822881	2.56637	2.32112	2.43976	0.401451	4.38571	1.23821	2.5489	0.337226	1.15615	1.74099	1.93995	0.221779	1.15509	0.319744	0.572039	0.396896	1.47863	0.584583	0.234718
2326	53.8858	809.471			1.31631	0.452834	0.577459	1.97504	1.05553	0.361076	0.393191	0.137933	1.57335	0.211601	0.60774	0.937437	1.89233	2.39128	2.01833	0.653752	0.311471	0.701385	0.411448	0.217649	0.545454	1.41745	0.742954	0.125663	0.249002	3.38701	1.32597	1.22313	1.03009	3.6052	1.93038	0.28697	1.96369	1.70156	0.316275	1.27381	0.356943	0.870892	0.268068	0.602459	0.858369	0.367691	2.0829	0.281245	0.557195
[truncated: 51 more columns]

## Sheet: Supplemental table 2
Supplemental table 2. Batch corrected metabolite intensity values for all epiRILs and the parents of the population, Col-0 and ddm1-2, detected in the flowers. The mz indicated in column C is the most unique mass feature of the mass peak cluster as selected by the MSClust software. Metabolite identification level according to Metabolomics Society Initiative (MSI; Summer et al., 2007); 1, Identifi…
Metabolite nr	Retention time (min)	selected mass feature (mz)	Putative Metabolite ID	MSI level	Col-0	Ddm-1	8	11	14	24	36	46	52	53	54	55	62	64	69	70	71	92	94	95	95	99	101	108	112	114	118	122	137	144	150	159	164	166	169	170	183	193	202	208	216	218	222	229	232
1	1.8676	286.921			0.995072	0.820037	0.987557	1.00856	1.04442	0.97894	1.00542	1.15354	0.938559	0.955604	1.10076	1.06878	1.06511	1.07546	1.09452	0.857179	1.09566	1.01846	1.06473	1.09018	1.14943	1.02857	0.92318	0.974305	1.0487	1.03562	0.889655	0.869138	0.93173	0.978165	0.856693	0.929467	0.899961	0.723999	0.967207	1.04979	0.978299	0.938852	1.06578	0.985891	0.996346	0.979085	1.11528	1.06461	1.20458
3	1.88545	270.944			0.997195	0.793615	1.01817	0.933041	1.10814	1.00416	0.941099	1.15892	1.09711	0.888232	1.01459	1.23988	1.1544	0.903434	0.962342	0.879223	0.92642	0.591105	1.27856	1.29337	1.12768	0.927371	0.893878	1.03376	1.13726	0.929787	1.01768	0.767247	0.932757	1.05501	1.05661	0.738035	1.35826	0.930228	0.955479	1.03659	1.08753	1.07608	1.13598	1.24577	1.0686	1.26753	1.21083	0.962672	1.63456
22	1.93903	618.865			1.01498	0.783604	1.01487	1.01412	1.0371	1.03219	0.984499	1.15648	1.0425	0.920666	1.1436	1.0497	1.04547	0.965032	0.979552	0.794414	0.927194	0.997762	1.0772	1.05688	1.13183	1.00669	0.96018	1.06487	1.09596	0.979646	0.875345	0.85747	0.945124	1.03173	0.872161	0.902569	0.90252	0.69285	0.954099	1.03815	0.975633	0.906948	1.06257	0.976292	1.02599	1.2038	1.033	1.06825	1.23146
62	2.10167	570.837			0.97542	0.819214	0.983981	0.962223	1.05416	1.10659	1.00271	1.0401	1.08615	0.898563	1.13874	1.05415	1.05749	0.921378	0.95644	0.78623	0.886743	1.06657	1.1348	1.0321	1.07265	0.934593	0.929405	0.979335	1.08185	0.916481	0.806692	0.832191	0.939805	0.974143	0.866791	0.956078	0.87034	0.639929	0.946379	1.14049	1.01569	0.862569	1.053	0.949982	0.95298	1.14602	1.04668	1.0931	1.09628
68	2.1374	424.907			0.951084	0.799412	0.90536	0.942617	1.09134	1.12301	1.06457	0.976044	1.02118	0.820666	1.00658	1.2487	1.10733	0.922228	0.932963	0.77987	0.902139	0.954044	1.25094	0.981468	0.958028	0.859837	0.904034	0.976938	1.0096	0.891087	0.857673	0.925798	0.932698	1.01397	0.878327	0.816074	0.983876	0.790223	0.871947	1.19004	0.959542	0.873792	1.07087	1.05562	0.994386	1.18907	0.933797	1.16213	1.08718
81	2.21073	244.939			0.981781	0.850066	0.995517	0.971342	1.0061	1.0977	0.98973	1.09023	1.08956	0.928143	1.13999	1.14675	1.04083	0.951018	0.934249	0.753253	0.866984	1.08242	1.04457	1.11614	1.1096	0.936066	0.974057	1.02547	1.03956	0.965415	0.824208	0.73547	0.973815	1.02799	0.831377	0.946152	0.980188	0.644034	0.999314	1.05164	0.975819	0.952966	1.03528	0.965635	0.944235	1.13831	1.09565	1.08475	1.20914
99	2.22858	378.916			0.995453	0.861123	0.902718	0.969192	1.09398	0.997975	1.05982	0.952822	0.978155	0.849301	0.95531	1.04585	1.10833	1.01307	1.10746	0.895536	1.08009	0.941754	1.19867	0.932939	0.959172	0.909725	0.836146	0.931471	0.97228	0.955352	0.902728	1.13314	0.941746	0.985576	0.906359	0.892666	0.944422	0.876327	0.932211	1.13682	0.915551	0.904238	1.14653	0.996882	0.992029	1.03684	0.913889	1.13785	0.964275
130	2.33575	196.947			1.07011	0.772549	0.921094	0.928301	0.976007	1.07538	1.01711	0.927986	1.21674	0.887967	0.909061	0.993504	1.15997	0.868534	0.881874	0.807946	0.794514	0.974103	1.05651	0.907377	0.945479	0.922212	0.872129	1.0303	0.96084	0.915018	0.809937	1.18717	0.993233	1.11951	0.758702	0.908929	0.869798	0.811467	1.11329	1.0549	0.839524	0.840425	1.16148	0.996476	0.861642	1.17081	0.944775	1.23031	0.871876
135	2.33575	298.882			1.05807	0.825339	0.96739	0.956439	0.896979	1.0742	0.970965	1.06889	1.31949	0.918203	1.14757	1.14829	1.07424	0.854235	0.829117	0.701163	0.782241	1.03129	0.971535	1.27266	1.08459	0.927483	0.962716	1.06206	1.00533	0.94598	0.805081	0.57935	1.00694	1.17416	0.782506	1.00501	1.06474	0.777831	1.10849	0.95888	0.934246	1.0765	1.054	0.949338	0.867592	1.31416	1.23758	0.96834	1.22732
200	2.4448	187.997			0.99073	0.859251	1.04774	0.900464	0.96293	1.02841	1.04402	1.0743	1.1531	1.03129	1.09684	1.02679	1.12248	0.983363	0.947251	0.968909	0.9515	1.0659	0.970637	1.08169	1.17972	0.982513	0.888471	1.12508	0.953681	1.00213	0.829223	0.693882	0.918996	1.03347	0.936237	1.01679	1.07846	0.84813	1.06372	0.999621	0.990988	1.01944	1.16606	1.10963	0.929852	1.11355	1.04535	0.992886	1.04046
217	2.49838	352.054			1.02678	0.753609	0.916655	0.959776	1.0466	1.02827	1.04203	0.978655	1.07331	0.881975	0.91337	0.926996	1.07627	0.95305	0.995983	0.813749	1.05863	0.981517	1.08512	0.836871	1.0383	0.838264	0.868383	0.998531	0.876786	0.929413	0.929169	1.11345	0.948565	1.08781	0.836831	0.819398	0.766481	0.747335	1.03386	1.09601	0.913535	0.810198	1.23974	1.06345	0.87968	1.08569	0.894544	1.49232	0.911372
221	2.49838	552.053			1.00249	0.75997	0.925246	0.915892	0.943265	1.14487	0.984456	1.09102	1.32457	0.888631	1.06975	1.04472	1.08084	0.856368	0.836277	0.831465	0.845092	1.04105	1.01684	1.08406	1.07428	0.973206	0.922146	1.11388	1.01187	0.970986	0.83513	0.640577	1.03831	1.23114	0.907444	1.02798	0.975558	0.767961	1.09939	1.02515	0.906974	0.96166	1.14575	0.937984	0.82403	1.19022	1.17796	1.02609	1.17754
225	2.51623	325.124			1.0287	0.851009	1.06474	1.03008	1.00239	0.980695	0.948509	1.03042	1.11767	0.981146	0.999314	1.10847	1.18555	0.959296	0.95941	0.875056	0.960159	0.889375	1.05872	1.0934	1.02366	0.900577	0.934355	1.01427	0.937457	0.954176	0.801319	0.796787	0.918175	1.06992	0.930775	0.977932	1.05129	0.833822	0.984678	1.03676	0.970172	0.947706	1.21216	0.964606	0.909547	1.15908	1.07897	0.972908	1.22294
263	2.64315	510.146			1.11888	0.807564	0.898593	0.98915	0.970618	0.935112	0.916677	1.0916	1.25526	0.891618	1.01789	1.09193	1.23837	0.887658	1.05309	0.802687	0.879816	1.01197	1.03848	1.16233	1.12102	0.797177	0.76151	0.996678	1.0246	0.912555	0.979149	0.777245	0.896023	1.14493	0.82263	0.983748	0.983148	0.82957	1.05305	0.938084	0.987134	0.900638	1.31776	1.00623	0.847186	1.08927	1.13634	1.06352	1.20098
265	2.64315	526.119			1.10566	0.709192	0.892741	1.04144	0.925182	0.987423	0.885124	1.07955	1.23215	0.887237	1.01574	1.12225	1.30899	0.839486	0.996919	0.785894	0.888057	0.976861	1.04518	1.19252	1.06134	0.796587	0.914317	1.03839	1.04227	0.871111	0.992424	0.783779	0.93166	1.20265	0.883334	0.938954	1.07457	0.696261	1.0172	0.912216	0.970141	0.971662	1.33586	1.12348	0.820898	1.21109	1.09305	1.05744	1.31159
283	2.66102	524.162			1.09831	0.824615	0.890303	0.922127	0.946107	1.05159	0.887651	1.11758	1.27207	0.896986	1.13615	1.09852	1.33533	0.9355	0.918309	0.743732	0.839966	1.05776	1.08606	1.16755	1.11795	0.861299	0.766212	0.987885	1.03812	0.893342	0.947264	0.568262	0.838656	1.21306	0.851177	0.959216	1.03755	0.752637	1.11726	0.979915	0.971004	1.01178	1.31545	0.931624	0.855908	1.17027	1.19832	0.973532	1.06573
339	2.78793	764.22			0.93361	0.568627	0.854828	0.839381	1.29502	1.11961	0.981509	1.04234	0.534316	0.902152	1.2001	0.805007	0.474647	0.857152	0.586822	0.535438	0.568252	1.05334	1.22985	1.02671	0.782135	0.944338	1.54522	0.542635	1.06833	0.987321	0.735677	0.670759	1.45135	0.812232	1.09425	0.899243	0.974212	1.28095	0.715034	1.43667	0.981122	1.62498	0.472017	0.691808	0.802974	0.891099	0.945665	1.0154	1.04537
348	2.82365	346.053			1.01118	0.911191	0.942413	0.968035	1.04816	1.06988	0.95814	0.988066	0.977346	0.942664	1.08041	1.07936	0.9886	0.968087	0.857118	0.696002	0.878409	1.00736	1.06612	1.02214	1.11153	0.907939	1.13733	0.919677	1.09283	0.917745	0.906197	1.15377	1.05194	1.07355	0.905131	0.907517	0.945829	0.70856	0.984723	1.128	0.958907	0.968401	0.943378	1.15281	0.890199	0.998556	0.98181	0.992219	0.941924
367	2.85937	686.15			1.03008	0.785287	0.924847	0.699086	0.912594	1.07638	1.06642	1.05816	1.37243	0.938825	1.14427	1.09164	1.4021	0.914724	0.835873	0.746683	0.864616	1.14249	1.03231	1.06016	1.056	0.998536	0.787181	1.13696	1.04641	0.958909	0.914491	0.595124	0.863579	1.16103	0.832198	0.949123	1.03659	0.626366	1.22854	1.02547	1.01334	0.937704	1.4198	1.01106	0.848674	1.17999	1.16289	1.1712	1.1278
384	2.95057	824.226			1.01959	0.758767	0.940428	0.665698	0.884827	1.02103	1.07342	1.06745	1.43028	0.921146	1.16157	1.08715	1.45364	0.905675	0.84123	0.791174	0.892387	1.1096	1.01486	1.13999	1.10803	0.999012	0.760781	1.27682	1.06329	1.02015	1.03848	0.693579	0.836092	1.16384	0.930032	0.911839	1.01452	0.670427	1.22543	0.933975	1.01393	0.959462	1.44714	1.08259	0.843952	1.27783	1.03757	1.22667	1.28896
403	3.00415	633.154	D-Gluconic acid + GSSG (overlap?)	4	0.985626	0.822988	0.842136	0.878281	1.14855	0.843478	1.06233	1.0667	1.04574	0.834621	1.19738	1.17926	1.04674	0.893703	0.949223	0.721886	1.00687	1.04127	1.14735	0.978482	1.11656	0.821775	0.902441	0.853003	1.12394	1.10052	0.845988	0.940446	1.01353	1.12531	0.974399	0.917488	1.06056	0.721561	0.848763	1.10406	0.969394	1.00343	1.14943	0.926878	0.861111	1.18559	1.10739	1.22692	1.2008
409	3.022	274.025			0.985451	0.765002	0.838964	0.98265	0.928158	0.994341	1.01247	1.00827	1.18136	0.854911	1.08646	1.04543	1.14488	0.875152	0.925374	0.738478	0.982267	1.03976	1.07622	1.05695	1.02956	0.943926	0.870476	1.06223	1.04471	0.977865	0.847278	0.907549	0.951734	1.3323	0.939206	1.16582	0.978839	0.697785	1.04722	0.972671	0.908541	0.939391	1.09909	1.0284	0.880239	1.14055	1.03975	1.08972	1.05604
427	3.03987	209.064			0.938482	0.83054	0.864155	0.848021	0.869036	1.02118	1.02854	1.13234	1.24799	0.883221	1.19735	1.12016	1.25952	0.827923	0.792024	0.799661	0.884595	1.15939	1.05432	1.01574	1.15277	0.923605	0.896917	1.06723	1.09493	1.04272	0.980389	0.731867	0.97961	1.2156	0.916443	0.971806	1.08376	0.67803	1.04809	0.922549	0.906847	1.00575	1.19484	0.934248	0.834793	1.25019	1.13984	1.08526	1.20608
459	3.1132	132.041			0.871935	0.7231	0.840263	1.13398	0.954306	1.00364	0.919964	0.951837	1.11306	0.890433	1.07727	0.960304	1.01272	1.0207	0.78497	0.865956	0.825303	0.804921	0.980023	1.26257	1.03224	1.30176	0.77295	0.95713	0.918054	1.12704	0.835845	1.01521	1.16698	1.20131	0.950576	1.2403	0.959557	0.793796	1.24061	1.21029	0.805171	0.917038	1.02367	1.39616	0.980975	1.25797	0.984195	1.0674	0.829798
486	3.23822	173.009			1.03739	0.575712	0.90632	0.939078	1.03684	1.0837	0.98897	1.02052	1.16942	0.860226	1.17805	1.10136	0.953115	0.949476	1.02434	0.590374	0.858087	0.930461	1.2598	1.05947	1.04847	0.944589	0.893905	0.794215	1.05399	0.863463	0.717211	0.590633	0.941302	1.09485	0.784147	0.944432	1.04903	0.584274	1.21252	1.19156	1.03703	0.904123	1.27268	1.03365	0.878124	1.05672	1.18406	0.93354	1.10728
512	3.34728	333.059			1.06593	0.904944	0.842307	0.814619	0.97175	1.083	1.0162	1.02772	1.16426	0.912339	1.1696	1.16553	1.16423	0.781325	0.711472	0.710588	0.781675	1.06369	1.10258	1.03307	1.04636	0.824145	1.12298	0.896372	1.1824	0.938405	0.912134	0.76811	1.0437	1.17634	0.835162	1.02489	1.0749	0.67524	0.929958	1.02996	0.889052	1.03424	1.02959	1.0236	0.787035	1.26699	1.11714	1.11113	1.19591
532	3.40085	356.999			1.05768	0.763884	0.992591	0.87897	1.03803	1.14257	1.01298	1.10955	1.15722	0.906669	1.05867	1.01083	1.0242	0.86493	0.859781	0.810216	0.872875	1.01554	1.141	1.01877	1.15368	0.85992	0.951651	0.811752	1.01013	0.863296	0.797336	0.671174	1.01686	1.16609	0.804038	0.862483	0.937641	0.685384	1.1433	1.14959	0.944518	0.902238	1.23661	0.987074	0.940352	1.01729	1.11079	1.08341	1.18151
551	3.49205	489.042			0.946891	0.760952	0.833318	0.851401	0.950334	1.12023	1.01645	1.05778	1.18828	0.941579	1.09918	1.07576	1.15834	0.735401	0.59771	0.777151	0.842417	1.16429	0.972357	0.983671	1.09643	0.807645	1.12322	0.856574	0.949485	1.06225	0.790528	0.711407	1.07053	1.23778	0.822686	0.913314	1.01321	0.575046	1.06249	1.0633	0.757567	0.934413	1.12193	0.954055	0.837982	1.26636	1.11778	1.18159	1.27417
561	3.5992	191.019			0.986214	0.777265	0.951229	0.860789	0.951534	1.03675	0.991945	1.04586	1.22763	0.941223	1.24133	1.13721	1.22757	0.824193	0.803282	0.735974	0.878622	1.23405	1.01106	0.990714	1.06002	0.921539	0.958292	1.07095	1.07474	1.03343	0.855825	0.59978	1.04021	1.12217	0.905077	1.00172	1.12834	0.64865	1.0919	0.991305	0.96432	0.851429	1.19725	1.01561	0.875559	1.12282	1.11987	1.09394	1.1583
567	3.70827	422.026			1.00888	0.90477	0.918875	0.645883	1.07209	0.996863	1.08403	1.18631	1.18601	0.898448	1.1572	1.13116	1.00279	0.847122	0.828686	0.669726	0.745072	1.01794	1.04969	1.04342	1.22436	0.842897	1.00734	0.883742	1.16219	1.05298	0.871895	0.856563	1.06498	1.15578	0.773133	0.808937	1.00387	0.67737	0.93542	1.22903	0.974904	1.00316	1.026	0.743063	0.725021	1.00117	1.24534	1.08424	1.09884
572	3.79757	332.955			0.879588	0.617818	0.844031	1.18514	0.894558	1.4683	0.820214	0.992424	1.80808	0.805153	1.16794	1.0758	1.36214	0.747824	0.903665	0.758797	0.822363	0.865299	0.965452	1.18455	0.967736	1.32746	0.750489	0.888356	1.13032	0.775827	0.780679	0.936409	0.840903	1.30376	0.944884	1.12389	1.22208	0.742905	0.904496	0.912253	0.915291	0.860305	1.8473	1.21202	0.806762	1.04919	1.0078	0.930307	1.33879
581	3.88877	173.009			1.03597	0.636128	0.890652	0.9073	0.926334	1.25015	0.913408	1.01848	1.39416	0.841075	1.14046	1.04892	1.33149	0.796507	0.908743	0.724209	0.881601	0.949055	1.05454	1.14151	1.00578	1.04647	0.806505	0.972064	1.09979	0.794075	0.824956	0.860333	0.88671	1.33344	0.897243	1.10311	1.14025	0.736052	1.0142	0.948766	0.997482	0.906812	1.41263	1.19669	0.85216	1.04674	1.04914	1.00585	1.27091
597	4.12283	885.012			1.06157	0.965727	0.92616	0.486069	0.966015	0.975578	1.14508	1.21615	1.30785	0.908017	1.04704	1.05644	0.85421	0.924143	0.749021	0.611988	0.654208	0.819353	0.968355	1.0202	1.26159	0.867563	1.0789	0.889441	1.16899	1.00692	0.920579	0.811644	0.91068	1.30529	0.608038	0.865567	0.90236	0.682692	1.0401	1.26307	0.959107	1.03834	0.918463	0.686573	0.577249	0.920504	1.46823	0.849155	0.823677
601	4.23188	860.077			1.00649	0.846655	0.852478	0.561061	0.973231	1.01771	1.08598	1.14819	1.24554	0.826178	1.13038	1.12651	0.896353	0.84933	0.673844	0.56883	0.64568	1.04858	1.00845	0.94707	1.15814	0.827215	1.0293	0.91135	1.17991	1.01807	0.699227	0.630454	1.06811	1.25034	0.588224	0.902013	1.00269	0.583426	1.00435	1.37944	0.919846	0.932661	0.906884	0.681406	0.581826	1.12085	1.30932	0.978839	0.901305
609	4.4481	904.132			0.976198	0.812546	0.89153	0.715733	0.988546	0.993217	1.08228	1.20626	1.26778	0.803425	1.07994	1.05862	0.850465	0.934578	0.774379	0.636125	0.713956	0.984125	0.994047	0.9837	1.13519	0.827165	0.978286	0.904884	1.12825	1.02819	0.766736	0.698059	1.00452	1.27836	0.631808	0.954573	0.928816	0.642403	1.13557	1.24161	0.916884	0.871307	0.933684	0.856765	0.718136	1.14292	1.21666	0.913655	0.941241
622	4.59288	1311.15	4-methylsulfinylbutyl glucosinolate	2	0.957378	0.889188	0.814843	0.655548	0.953106	1.05017	1.12357	1.19565	1.21623	0.873126	1.13408	1.10137	0.891959	0.892945	0.7463	0.697485	0.662233	0.858573	1.14278	1.15947	1.15957	0.922496	0.96987	0.887622	1.21734	0.973513	0.819809	0.626547	1.1016	1.23783	0.673088	0.990894	1.14998	0.685254	0.878948	1.28005	0.975224	0.81481	0.817485	0.658292	0.70524	1.06128	1.41037	0.835088	0.832291
646	4.68218	895.07			1.01908	0.85201	0.909895	0.802965	0.956796	1.02746	1.05509	1.06734	1.22889	0.895294	1.07929	1.02726	1.09133	0.930015	0.931129	0.792163	0.880822	0.996218	1.05406	1.06802	1.10546	0.970987	0.887821	1.03334	1.07172	0.960957	0.920905	0.817184	0.977361	1.14999	0.817748	1.02394	1.05372	0.746004	1.09746	1.06186	0.970239	0.978793	1.14795	0.918927	0.823035	1.12765	1.16566	0.998203	1.05546
659	4.77338	1364.07			1.04786	0.800753	0.898383	0.821537	0.924718	1.01464	1.03556	1.10102	1.29632	0.864951	1.09419	1.01772	1.12504	0.92314	0.9723	0.786708	0.922012	1.01459	1.0419	1.00237	1.09169	0.974137	0.786859	1.07367	1.05141	0.954983	0.943276	0.844837	0.934758	1.17528	0.822777	1.04537	1.06312	0.719711	1.17626	1.0064	0.965344	1.01987	1.29196	0.97469	0.797971	1.19299	1.1417	1.02972	1.09367
660	4.82695	450.057			1.02015	0.811626	0.89233	0.806185	0.844338	0.968366	0.959372	0.976699	1.15173	0.880535	1.10693	1.09551	1.14758	0.92392	0.873977	0.842011	0.657859	0.999234	0.981619	1.00212	1.04003	0.907769	0.898289	1.10445	1.07358	1.00078	0.936294	0.79656	0.863493	1.11624	0.820464	1.076	1.12209	0.728048	1.11631	1.07279	1.08656	1.02599	1.1089	0.859377	0.840857	1.08148	1.0906	0.985393	0.928732
667	5.18795	548.02			1.08235	0.67593	0.976508	0.827273	1.04641	0.909858	0.955443	1.06432	1.2815	0.873143	1.19699	0.945888	1.27061	1.00205	1.0835	0.703771	1.02301	1.10859	1.07773	1.12186	1.08716	1.01805	0.692765	1.05447	1.08972	0.981896	0.906757	0.817196	0.962804	1.20205	0.714359	1.11057	1.02287	0.446905	1.17813	1.00864	1.05751	1.05059	1.31148	0.931907	0.868701	1.18606	1.15028	1.09845	1.29957
673	5.72943	323.029			0.934001	0.990051	0.926415	1.0205	0.829171	2.14314	0.90155	0.981051	0.387764	1.05799	0.935029	0.964999	0.420069	0.56225	0.534093	1.08908	0.494712	1.06932	0.902777	0.989688	0.948378	0.4116	2.45493	0.364636	0.955908	0.404387	0.999914	1.02945	0.995246	0.375532	0.94573	0.98482	0.988855	0.979413	0.528667	1.06154	0.757728	0.970808	0.38483	1.01545	0.877346	0.8445	0.976017	1.00804	1.02973
679	6.48713	450.057			0.985787	0.797502	0.846776	0.64415	0.936072	1.14809	1.09591	1.11847	1.2507	0.842573	1.07727	1.06118	1.11911	0.866763	0.837398	0.684381	0.831075	0.933819	1.08043	1.08527	1.15807	0.891803	0.941678	1.03748	1.09472	0.968044	0.852231	0.599014	0.910076	1.13673	0.703742	0.868939	1.03557	0.666969	0.964351	1.07636	1.02825	0.981251	1.1285	0.858581	0.702059	1.17129	1.26872	0.935672	1.04865
682	6.68548	603.003			0.951564	1.04923	0.842556	0.771725	0.874525	1.06836	1.09544	1.2888	1.47268	0.757941	1.15108	1.20655	1.633	0.610225	0.637761	0.870603	1.18533	1.2312	1.04326	0.974852	1.27694	0.792667	1.01298	1.06739	1.09446	1.13452	0.926898	0.798047	0.898634	1.0094	1.07021	0.832066	0.972537	0.669417	0.627291	0.711552	0.657658	0.908361	1.54724	0.951341	0.778687	1.40056	0.99067	1.2258	1.30713
686	6.92145	535.037			0.846462	0.824079	0.808508	0.807446	0.869898	1.0696	1.13486	1.09535	1.33044	0.912794	1.09891	1.0942	1.23171	0.663853	0.594088	0.806703	0.759268	1.0456	1.0205	0.899074	1.12915	0.978999	1.17621	0.964879	1.14031	1.20982	0.82489	0.63679	1.28761	1.2295	0.945245	0.878507	0.861436	0.69768	0.959711	0.960913	0.706835	0.759533	1.06837	0.986571	0.701845	1.1281	0.90055	0.981117	1.16799
694	9.79152	464.073			0.138146	1.06234	1.53008	0.139397	1.40874	0.14551	2.27975	1.05469	0.105132	1.81716	0.968949	0.957357	0.0996137	1.39231	1.33797	0.950006	0.440418	0.971306	1.6774	0.914659	1.07519	0.100231	1.67921	0.102574	1.08093	1.49323	1.02326	0.999367	1.15434	0.926682	0.919022	0.966897	1.09054	0.934254	0.750782	2.03033	0.152084	1.08902	0.101021	1.08369	0.828986	0.111182	0.984505	0.931498	0.996784
698	10.2954	465.076			0.995682	1.16993	0.83723	0.626656	0.859117	1.11603	1.17757	1.04169	1.40895	0.990628	1.2335	1.16632	0.976088	0.865165	0.827913	0.589277	0.60412	0.857354	1.01801	0.992222	1.00891	0.736368	0.959383	1.11163	1.19233	0.714271	0.799003	0.361383	0.67431	1.293	0.796564	0.851274	1.62996	1.02658	0.95534	1.16272	1.09317	1.17229	1.06742	0.814874	0.528162	1.06179	1.3492	0.924718	0.670496
707	13.455	285.062	dihydroxybenzoic acid xyloside III	3	0.998406	0.751969	0.892115	1.03354	0.951764	0.900808	1.11928	0.901489	1.15813	0.977901	0.968616	1.08673	1.01452	0.942247	0.841961	0.747604	0.875434	0.89896	1.07152	0.901344	0.839234	1.08018	0.91338	1.02301	1.04671	0.990723	0.735648	1.11427	1.05179	1.00929	0.921564	0.789464	1.81913	0.649478	1.17952	1.09058	0.962464	0.874802	1.0742	1.41255	0.878587	1.32453	0.971848	1.51662	1.17508
709	13.455	480.045			0.762049	0.813731	0.698647	0.731034	0.920207	0.965052	1.20594	1.04004	1.34342	0.854264	1.17703	1.16668	1.25382	0.671377	0.627983	0.656728	0.65931	0.876932	1.25612	0.909093	1.05153	1.06726	0.966447	1.17449	1.17593	1.24308	0.819341	0.389728	1.00568	1.09839	0.965834	1.24696	1.25772	0.707897	1.00195	1.17743	0.785293	0.858939	1.19981	1.04078	0.777328	1.13763	1.07536	0.994665	0.841407
715	13.5443	479.042	4 or 5-Hydroxy-3-indolylmethylglucosinolate	2	0.803432	0.812185	0.669989	0.737483	0.944405	1.02015	1.15949	1.05284	1.37376	0.894473	1.21213	1.1918	1.29416	0.669564	0.578769	0.63711	0.634949	0.852669	1.33106	0.877375	1.07549	1.12534	0.93293	1.1197	1.19419	1.21374	0.755312	0.313225	1.01221	1.01749	0.896801	1.27753	1.21969	0.656227	1.0321	1.22108	0.794747	0.837078	1.15618	1.04138	0.710503	1.12292	1.0582	0.934513	0.78751
718	14.0143	137.027			0.998807	0.680418	0.756415	1.26433	0.984622	0.940117	0.817846	1.22424	1.05091	0.829444	1.62349	1.03232	1.32251	0.926433	0.801802	0.640774	0.748342	1.17725	1.01211	0.870285	1.2487	0.850351	0.929158	0.959188	1.13762	0.913055	0.734533	0.640803	1.00356	1.18941	0.874018	1.01896	0.819443	0.614942	0.943613	0.875629	0.983444	0.962453	1.53849	1.7682	0.846804	1.12504	1.12086	1.06232	0.870285
720	15.4404	285.063			1.01219	0.918889	1.01855	1.18174	1.02537	0.961003	0.961654	1.04379	1.11413	0.944489	1.0916	0.998751	1.1257	0.936569	0.944824	0.992074	0.914168	0.947044	0.954773	0.991616	0.982505	0.997578	0.971829	1.10685	1.01286	0.981059	0.859925	0.988711	0.999809	1.07713	0.964101	1.06462	0.971712	0.978151	1.05834	0.936419	0.938256	0.93094	1.09331	1.3813	0.945612	1.05798	1.00599	0.941289	0.974691
733	15.5673	979.164			1.10191	1.18176	0.830795	0.54984	0.803092	0.884775	1.17415	0.931655	1.50063	0.969021	1.24145	1.15314	0.742792	0.851108	0.751515	0.501981	0.539105	0.709178	0.829766	0.922668	0.940606	0.657137	0.973986	1.06637	1.12939	0.733135	0.819779	0.330834	0.660726	1.33728	0.65729	0.704603	1.68604	0.859219	1.06965	1.35214	1.16637	1.16282	0.892392	0.717028	0.489288	1.0349	1.39074	0.777418	0.623697
748	16.3072	223.063			1.02631	1.10405	0.975669	0.716271	1.04764	0.63024	1.29754	1.35915	1.04432	0.948142	1.01478	1.47572	1.36746	0.909758	0.609567	0.592328	0.925542	1.20298	0.812441	1.36061	1.36165	0.679708	1.4573	0.972195	1.15276	1.04115	1.0967	0.774065	1.05259	0.88643	1.06205	0.808539	1.03563	0.5044	0.803444	1.08915	0.953626	1.28606	1.09132	1.08393	0.593594	1.47046	0.901464	1.26521	1.01566
755	18.4176	863.08			1.02386	0.639081	0.392448	0.790366	1.68037	0.8061	0.613011	1.53072	0.693321	0.757872	0.953137	1.34527	0.444305	0.817194	0.477713	0.71398	1.21501	0.763828	1.89359	0.663812	1.41574	1.03434	0.865645	1.22522	0.818373	1.33091	0.626412	0.622219	2.01685	0.980589	0.654064	2.49201	1.12447	0.672956	1.7344	2.1428	0.5849	0.690127	0.68474	0.657489	0.456642	2.05541	1.74459	0.706431	0.654353
758	18.6358	436.041	unknown GLS_ C12H23NO10S3	3	1.03851	0.671412	0.772931	1.00354	1.10369	0.99362	0.799812	1.16268	1.16541	0.95394	1.12923	1.16959	0.921962	0.968774	0.955002	0.71948	1.0422	1.04375	1.18297	1.05079	1.19134	1.02138	0.861563	1.08668	1.05385	1.06697	0.767286	0.559215	1.12722	1.06147	0.824801	1.25003	1.08519	0.667666	1.25396	1.18574	0.885322	0.958519	1.13522	0.727723	0.83476	1.23665	1.20911	1.02336	0.926205
759	18.6536	879.062	4-methylthiobutyl glucosinolate	2	1.07246	0.504208	0.515478	0.985299	1.37539	0.975266	0.641188	1.35694	0.98921	0.889126	1.15843	1.30034	0.668573	0.937467	0.75096	0.596805	1.14088	1.03654	1.49589	0.900665	1.30887	1.06756	0.873741	1.17495	1.05365	1.1653	0.647724	0.362478	1.49416	1.06341	0.607321	1.74794	1.16152	0.529757	1.45062	1.58312	0.707456	0.878694	0.937456	0.463212	0.674241	1.57904	1.53865	0.919855	0.637634
772	18.852	386.118			1.06467	0.978782	0.973362	0.675637	0.986614	1.10285	0.996794	1.22097	1.06647	0.856869	1.18853	1.12178	1.12214	0.796942	0.837786	0.660067	0.858127	1.41099	1.1767	1.17355	1.16427	0.70286	1.16053	0.916837	1.09549	0.927017	0.961625	0.535796	0.929467	1.07356	1.13813	0.861433	0.952873	0.714326	0.670106	1.13199	1.08677	1.08936	1.08369	0.825073	0.756977	1.08285	1.1411	1.34202	1.19839
776	19.2308	609.145			1.02549	1.00611	1.0815	0.741949	1.01922	0.568208	1.17437	1.32517	1.03826	1.01784	1.13844	1.62965	1.3278	0.991484	0.657456	0.668219	0.806917	1.26817	1.02899	1.05924	1.24711	0.65812	1.6933	0.800317	1.44413	1.14365	1.03115	0.410615	1.35576	1.0529	1.08412	0.875825	0.827543	0.49472	0.893704	1.05397	0.910123	1.0474	1.00769	1.17565	0.698468	1.13336	0.90861	0.909484	0.891977
788	19.3756	846.2			1.05179	1.12423	0.97767	0.700081	0.927155	0.855998	0.986386	1.46626	1.03357	0.792054	1.45747	1.38732	1.43731	0.92972	0.658449	0.719653	0.782356	1.51087	1.27761	0.936115	1.494	0.572266	1.30158	0.886512	1.21925	1.00149	1.02579	0.498272	0.91699	1.07985	1.18498	0.81729	0.969017	0.580747	0.699788	1.099	1.17465	1.14955	1.27857	0.825721	0.589942	1.15721	1.09953	0.991368	1.00745
794	19.8438	223.058			0.923526	0.82547	0.754923	0.76762	0.849952	0.813819	1.34612	1.25578	1.35532	0.691749	0.931566	1.19808	1.2707	0.787336	0.705641	0.612184	0.801289	1.03712	0.756129	1.44723	1.17688	0.785941	0.951084	0.852801	0.932253	0.948188	0.756609	0.780303	0.883907	0.865272	0.897306	0.743099	0.853631	0.642968	0.792335	1.05389	0.892668	1.24806	1.2475	0.934215	0.92173	0.995879	1.19084	1.43883	0.97036
797	20.0421	385.178			1.05706	0.77452	0.889185	0.955274	0.931843	0.891815	0.941843	1.05718	1.22971	0.95196	1.08173	1.17565	1.18377	1.00783	0.961829	0.722399	0.933983	0.814309	1.12008	1.03762	0.91984	0.937248	0.882892	1.41292	1.04873	1.06409	0.800222	0.783732	1.59671	0.970099	0.930691	1.12014	0.997829	0.780353	0.901601	1.19873	0.986412	1.14121	0.929429	1.24252	0.943397	0.888852	1.11483	1.2741	1.08099
801	20.2602	172.099			0.966738	1.00723	1.01677	1.02529	1.01582	0.981409	0.997399	0.995813	1.01509	0.950665	1.0133	0.993284	0.980312	1.01138	0.98589	1.00638	1.05595	1.03425	1.02785	1.00408	1.07434	0.937699	0.98785	1.03971	0.947251	1.0163	1.11165	0.9983	1.04499	0.971286	0.9856	1.00468	0.918902	1.04278	0.966498	0.947006	1.0112	1.08547	1.04928	1.03087	0.930432	1.03384	1.07106	0.997725	0.951569
804	20.7105	552.181			0.982018	0.91181	1.05813	0.678944	0.91766	1.06914	1.09021	1.59638	1.16839	0.763541	1.02402	0.92257	1.08926	0.751386	0.598875	0.659939	0.906182	1.67566	0.932037	0.945961	1.55652	0.648939	1.15232	0.75875	0.906411	1.03165	1.11942	0.47614	0.935909	1.04014	1.09776	0.721014	0.704364	0.559249	0.808764	0.939803	1.09794	0.943481	1.00882	1.0366	0.979934	1.1643	1.27008	1.43316	2.10964
826	20.9446	824.214			0.996447	0.907151	0.903831	1.09807	0.623097	0.915793	0.979798	1.17884	1.66547	0.844398	1.15261	1.10297	1.78443	0.886956	1.15269	0.763956	1.27245	1.16667	0.97868	1.08585	1.196	0.839429	0.432339	1.42222	1.13745	0.97151	0.923169	0.598633	0.53099	1.4389	1.09749	0.993331	0.938695	0.734614	1.19174	0.494181	0.987487	1.10264	1.7736	0.903071	0.869841	1.61549	1.08074	1.11992	1.14477
853	21.0536	839.166			0.969586	0.935665	0.906526	1.36537	0.646768	0.85795	0.966888	1.18994	1.56707	0.936382	1.14756	1.11649	1.69097	0.885373	1.15429	0.767919	1.2328	1.18051	1.01551	1.09107	1.19472	0.899316	0.447849	1.3458	1.1348	0.863496	0.94784	0.584378	0.574469	1.4213	1.08445	0.964865	0.977325	0.744296	1.18516	0.514224	0.953867	1.0921	1.64561	0.895128	0.937892	1.5621	1.0679	1.12971	1.1136
856	21.0893	838.176			0.974037	1.02274	1.02454	0.897577	1.43634	0.972572	1.13221	0.98592	0.345153	1.04566	1.00203	1.18904	0.284857	1.02489	0.581524	0.684654	0.495693	0.901061	1.62362	1.19962	0.972145	0.641053	1.95287	0.320532	0.908802	0.887957	0.856027	0.453145	1.79322	0.600601	0.756894	0.830047	1.48673	0.817211	0.481873	1.58858	0.967266	0.972421	0.265151	0.857112	0.747457	0.549941	1.07259	0.8673	0.717428
868	21.3056	905.258			1.07417	0.677003	0.986278	0.814089	0.75266	1.01718	0.991481	0.864482	1.54374	0.750126	0.87183	1.05065	0.814725	1.05829	0.846442	0.570169	0.636554	0.895979	0.632759	1.24689	0.867849	1.08301	0.579687	1.11244	0.921184	0.96301	0.718412	0.500632	0.706343	1.56585	0.677391	0.796757	1.37774	0.604335	1.90613	1.12438	1.09134	1.02116	1.25562	0.88057	0.681967	1.31479	1.522	0.896904	0.900459
899	21.4325	987.212			1.0159	0.860965	0.943492	0.796332	0.857446	1.0263	0.991776	1.01114	1.39079	0.892692	1.0499	1.07508	1.07484	1.00402	0.971257	0.777204	0.758092	1.00729	0.845388	1.13307	1.00767	1.01454	0.710755	1.1603	1.03257	1.0393	0.876685	0.644787	0.815492	1.26766	0.812407	0.968138	1.08321	0.791737	1.39649	0.98166	1.04033	1.04136	1.2567	0.954494	0.810889	1.27766	1.23461	0.965884	0.995446
926	21.5773	479.049			1.02885	0.848709	0.876717	0.804671	0.881667	1.08144	0.963229	1.11697	1.41405	0.910969	1.10989	1.16493	1.2397	1.14271	0.853865	0.700601	0.751383	0.933215	1.13458	1.15202	1.10496	1.06488	0.753253	1.28247	1.20036	0.937884	0.794025	0.359795	0.927913	1.21335	0.642723	1.0795	1.22565	0.809237	1.07597	1.17826	1.00993	0.981826	1.09219	1.08577	0.755896	1.15477	1.21401	0.738503	0.823127
939	21.6666	463.049	4 or 5-Hydroxy-3-indolylmethylglucosinolate	3	1.00868	0.861661	0.861211	0.818191	0.859633	1.09809	1.00625	1.07659	1.63021	0.946989	1.05184	1.18009	1.63816	1.02989	0.831477	0.719745	0.752672	0.829843	1.24073	1.08741	1.06593	0.898239	0.715125	1.39747	1.28614	0.931018	0.779943	0.33767	0.898531	1.22157	0.554518	1.03622	1.27113	0.875101	1.00841	1.00553	1.00362	0.85841	1.29616	1.02819	0.758892	1.13829	1.32751	0.546051	0.816284
945	21.7935	485.011			0.943883	0.880687	0.905539	0.989416	0.848338	1.23346	1.14886	1.11989	1.55509	0.903302	1.12205	1.12106	1.75205	0.970365	0.94727	0.758932	0.941364	1.01962	1.17212	1.05654	1.11136	0.910715	0.624162	1.40325	1.2198	0.797374	0.846961	0.508321	0.750698	1.20477	0.7837	1.08807	1.06284	0.81302	1.11491	0.840297	0.890153	0.936523	1.56502	0.991343	0.8387	1.2553	1.2036	0.771873	1.06462
946	21.7935	519.188			0.895132	0.875718	1.09306	0.821119	1.11398	0.911421	1.29751	1.39232	0.725275	0.772552	1.15411	0.963325	0.900797	0.821805	0.628985	0.826018	0.775199	1.05684	1.4893	0.882232	1.33118	0.847673	1.55184	0.676032	1.19245	1.20106	1.04586	0.985732	1.06432	0.740337	1.68514	0.886914	1.17642	0.838991	0.696508	0.946196	0.856342	1.25799	0.871172	0.863681	1.02531	1.16441	0.943519	1.2589	1.10032
951	22.1723	609.146			0.861367	1.45855	0.945608	0.733745	0.979658	0.833785	1.0222	1.74634	0.839437	0.882068	1.54566	1.52277	1.50997	0.881261	0.646438	0.782719	0.805387	1.60233	1.16304	0.855614	1.7119	0.555959	1.75556	0.658548	0.979622	1.13715	1.38543	0.468787	0.952847	1.0129	1.34743	0.674268	0.778942	0.577642	0.5273	1.01397	1.24957	1.19986	1.25795	0.600707	0.564775	1.02014	1.05274	1.13563	0.840279
956	22.3707	626.144			0.91663	0.849255	0.777637	0.869065	0.910277	1.23465	0.898324	1.1936	1.1212	0.867243	1.61468	1.23535	1.25568	0.863676	0.541957	0.633625	0.660335	1.36986	0.990009	1.06738	1.19189	0.900508	0.922997	0.857632	1.37488	0.959703	0.698874	0.296758	1.07636	1.14544	0.962503	1.02263	0.892942	0.74042	1.03847	1.08474	0.931705	0.945632	0.856323	0.689673	0.717877	1.02686	1.23701	0.930199	0.812364
983	22.8586	699.139			1.05088	0.996096	0.946971	0.836668	0.938861	0.868559	1.01321	1.4389	1.07181	0.810357	1.4107	1.4523	1.5875	0.912871	0.766606	0.689852	0.838785	1.44887	1.09115	1.00962	1.43326	0.669407	1.16951	0.877105	1.19685	0.998148	1.00283	0.520262	0.940851	1.11129	1.19457	0.868014	0.98358	0.602429	0.751917	1.05669	1.0819	1.24813	1.13565	0.771039	0.700279	1.08967	1.1554	1.16169	1.02972
1006	23.5091	385.188			0.947277	0.954126	1.00333	0.979253	1.01982	1.05143	0.955242	0.980633	0.995923	1.05974	1.00792	0.961898	0.989606	0.938077	0.983252	1.03778	0.95841	1.09605	0.993886	0.991583	0.948053	1.00753	0.955257	1.01116	1.03644	0.938492	1.00444	0.955629	1.00397	1.05591	0.928188	0.974263	0.967054	0.990877	1.0492	0.944643	1.0893	1.02643	1.04885	1.02756	0.984004	1.07761	0.96281	1.08164	1.11677
1018	23.7968	670.134			1.04368	1.39492	0.941486	0.773474	0.957841	0.861922	1.01054	1.76639	0.965589	0.873166	1.52032	1.50698	1.58841	1.13774	0.704081	0.772155	0.80283	1.58358	1.18989	0.857558	1.77877	0.542425	1.66224	0.78316	1.01448	1.06789	1.33354	0.423107	0.970578	0.933006	1.29845	0.717599	0.881404	0.578862	0.503041	1.05778	1.11414	1.18056	1.18657	0.605017	0.526551	0.965202	1.10609	1.07166	0.856038
1024	23.9058	739.208			1.04394	1.20133	0.934994	0.857045	0.998872	0.79889	0.931003	1.40416	1.07376	0.869192	1.27572	1.07395	1.48975	0.939609	0.798975	0.705619	0.812997	1.52113	1.1003	0.999695	1.33762	0.51648	1.42108	0.942833	1.18672	0.85204	1.06902	0.38297	0.999879	1.03939	1.20419	0.760447	0.959036	0.688663	0.622037	1.15788	1.18909	1.12833	1.04985	0.691517	0.628942	1.10282	1.06515	1.18128	0.988271
1031	24.1935	648.131			0.993428	1.01672	0.931696	0.993309	0.96864	0.98726	0.991608	1.1218	0.960924	0.939426	1.14334	1.07136	1.15588	1.05088	0.902514	0.948829	0.917333	1.15834	1.04735	0.982423	1.11442	0.969332	1.04795	0.965939	1.03232	0.983349	0.970256	0.894336	0.947086	1.00294	1.04371	0.971896	0.957413	0.883758	0.958071	1.04269	1.04856	1.0686	1.07461	0.92895	0.962021	1.03943	1.03592	1.02376	1.00076
1039	24.6814	431.193			0.89047	0.762392	0.905885	0.994394	1.05562	0.985343	0.722046	0.954718	0.995168	0.792408	1.17796	1.08768	1.11148	0.993663	0.85527	0.703522	0.970817	0.857034	0.861053	0.922356	0.973395	0.94562	0.899081	1.02058	0.957279	0.969866	0.815445	0.748722	1.73906	0.93338	0.944931	1.046	0.88186	0.656459	1.15459	1.1307	1.10445	1.4367	1.01734	1.29375	0.84402	1.44442	1.00443	1.54213	1.01273
1041	24.735	496.246			0.752591	1.16345	1.0531	0.917752	0.869197	1.17612	0.44605	1.36514	1.3103	0.964033	1.47688	1.3986	1.6227	1.09993	0.689701	0.746013	0.935263	1.77264	1.12377	0.975872	1.37461	0.426425	0.594179	1.02571	1.02732	1.25646	0.929646	0.196717	0.878646	1.33239	0.598925	1.09527	0.474334	0.872366	1.00418	1.01524	1.13921	1.00822	1.14262	0.385173	0.576284	1.49901	1.3317	1.10843	0.924255
1059	24.8976	699.139			0.958005	0.934429	0.852403	0.858093	1.00446	1.19063	0.861327	1.11098	1.15317	0.859428	1.5636	1.12667	1.323	0.862543	0.639829	0.676764	0.698297	1.40748	0.984184	0.994041	1.15992	0.881064	0.971327	0.879706	1.38672	0.891843	0.796972	0.329793	1.02983	1.099	0.893742	0.985956	0.917885	0.710547	0.983909	1.12841	0.96875	0.949473	0.975244	0.611477	0.791661	1.07348	1.43159	0.961951	0.862133
1078	25.3498	430.09			1.00902	1.38097	1.03866	0.773317	0.970878	0.866336	0.981003	1.46938	1.00812	0.867605	1.29019	1.42383	1.48555	0.861552	0.609295	0.660777	0.808973	1.49786	1.04727	0.981176	1.42553	0.499264	1.37614	0.776675	1.21406	1.04155	1.07084	0.545418	1.03822	1.03489	1.15625	0.783804	1.09752	0.566656	0.571832	1.12975	1.03451	1.21024	1.2246	0.751935	0.600363	1.15995	1.04083	1.22258	1.14905
1105	25.5303	707.143			1.05091	1.00591	0.967354	0.922639	0.997797	0.947801	1.00309	1.17713	1.0857	0.894412	1.16584	1.12464	1.25016	0.983751	0.903522	0.807491	0.954786	1.14474	1.06414	1.07492	1.15844	0.81442	0.970343	1.01117	1.05627	0.932485	0.987035	0.732494	0.956675	1.05689	1.04965	1.0373	1.10797	0.756432	0.858453	1.01791	1.03076	1.08454	1.21292	0.943784	0.834809	1.06922	1.08704	1.13031	1.10143
1111	25.6017	563.14			1.0783	1.17215	0.934545	0.946964	0.958892	0.891017	0.962307	1.35597	1.06465	0.911054	1.31685	1.17454	1.50706	1.03947	0.82963	0.719604	0.898792	1.35396	1.13443	1.00991	1.35789	0.651578	1.17813	0.889604	1.11823	0.9135	1.1048	0.529583	0.964953	1.05007	1.12751	0.912851	1.07976	0.716016	0.730011	1.0871	1.08001	1.13341	1.17824	0.726087	0.691247	1.08123	1.06579	1.2078	0.973813
1128	25.7286	683.144			0.98942	0.843005	1.0077	0.8093	1.00817	0.926015	0.937862	1.61957	1.13424	0.796868	1.57585	1.52185	1.57598	0.916431	0.741328	0.626455	0.802154	1.65732	1.16057	0.964068	1.58005	0.692144	1.13169	0.869423	1.12681	0.983183	0.905035	0.53977	0.884186	1.13063	1.0298	0.848511	1.00326	0.520805	0.749164	1.08311	1.07901	1.11091	1.35012	0.792544	0.69389	1.07769	1.11581	1.03692	1.10663
1131	25.7286	1016.22			0.895301	0.88918	0.944945	0.479011	1.49159	0.967925	0.978216	0.981244	0.529702	0.686105	1.00394	0.943253	0.451216	0.879636	0.472141	0.851332	0.50744	1.05541	1.50513	1.20296	1.01871	0.556934	1.82662	0.485993	0.934098	1.1946	0.973691	0.761704	2.0032	0.389708	0.913633	1.1167	0.913848	1.00511	0.443807	1.72169	1.18291	0.920847	0.421098	0.846259	0.547389	0.545348	0.929966	0.915235	0.886507
1142	25.9984	1217.32			1.01586	1.25856	0.966278	0.683192	0.996979	0.879458	1.01339	1.60171	0.980657	0.827183	1.54395	1.50781	1.57836	0.904488	0.611059	0.724282	0.814091	1.56264	1.11445	0.872408	1.61254	0.511227	1.51387	0.747348	1.07151	1.03477	1.09882	0.402988	0.934558	1.05788	1.14746	0.773092	0.935996	0.598023	0.599091	1.10239	1.13136	1.1777	1.19597	0.687898	0.571624	1.09953	1.15929	1.00585	0.940262
1161	26.1075	659.139			1.01965	1.10864	0.946817	0.821069	1.0096	0.899644	1.05182	1.40501	1.04785	0.840074	1.36745	1.29302	1.45601	0.97794	0.751482	0.725976	0.902772	1.33077	1.08449	0.909033	1.38484	0.669676	1.13342	0.896652	1.08417	0.985974	1.04299	0.453708	0.910214	1.0731	1.07622	0.923199	0.992743	0.621436	0.814954	1.07185	1.0771	1.19351	1.22992	0.794414	0.65392	1.14972	1.18763	1.03922	0.928094
1181	26.2701	424.058			0.802905	0.947505	1.07749	0.596073	1.01552	0.995387	1.2949	1.19511	1.19025	0.927446	1.15589	0.98332	1.16544	1.11616	0.648702	0.567476	0.804896	1.06429	1.41426	0.722455	1.20557	1.28812	0.785978	1.1175	1.41176	1.13973	0.820124	0.686871	1.20733	0.855423	1.00203	1.28299	0.925425	0.666589	0.811903	1.35952	1.03135	0.847877	1.20181	0.869822	0.763427	1.15661	1.42464	0.922634	0.890376
1184	26.5775	566.197			1.00496	0.967306	1.1665	0.927583	0.917977	0.873372	1.03397	1.42866	1.0466	0.832958	1.29533	1.3145	1.06826	0.928398	0.676895	0.679858	0.824707	1.58457	0.801295	0.724847	1.44608	0.673007	1.31004	0.837146	0.961449	1.10924	0.781837	0.600465	1.1411	0.987253	0.992828	0.948141	1.1088	0.568091	0.72721	1.15605	1.01722	1.18429	1.06547	1.10967	0.79606	1.32781	1.16468	1.30247	1.25604
1190	26.6847	521.203			1.02142	0.896392	0.990188	0.862177	0.925079	1.03473	1.01777	1.05657	1.0441	0.894119	1.19118	1.25269	1.15918	0.925077	0.773766	0.772795	0.88592	1.17139	1.12511	1.10939	1.0509	0.792618	1.21116	1.02808	1.11246	1.03636	0.836089	0.708187	1.04754	0.987018	1.10581	0.968762	0.974649	0.715245	0.910634	0.997691	1.04181	0.954819	1.01475	1.208	0.89699	1.32027	1.02452	1.3366	1.18913
1197	27.0636	595.157			1.04784	1.33708	0.867527	0.75347	0.947183	0.867069	0.930229	2.10835	0.967494	0.876993	1.36401	1.69491	1.62689	1.12877	0.674061	0.675942	0.855872	1.78519	1.12283	0.699296	2.07007	0.509639	1.7146	0.694007	0.937377	1.05554	1.18441	0.366716	0.988821	0.935786	1.54329	0.68009	0.810682	0.529531	0.546258	1.08905	1.19295	1.50239	1.24116	0.51387	0.493009	1.03874	1.03123	0.933917	0.712365
1206	27.244	493.059	1-Methoxy-3-indolylmethyl glucosinolate	2	0.947432	0.839254	0.842346	1.34489	1.01239	1.07773	0.897831	0.879272	1.06601	0.925415	1.06654	1.1315	1.07025	0.883365	0.922998	0.879816	0.837403	0.894229	1.07511	0.980888	0.878403	1.14226	0.916032	1.05636	1.01717	0.908839	0.817868	0.78736	0.976859	1.12481	0.93357	1.03292	1.2233	1.00229	1.00056	1.0092	0.917272	0.918002	0.951581	0.946638	0.929835	1.20248	0.914404	0.902251	0.849273
1214	27.3352	465.094			1.07036	0.989314	1.28128	0.686253	0.938942	0.922737	1.01572	1.2517	0.993576	0.860451	1.136	1.03476	1.33961	0.872478	0.713849	0.858282	0.896063	1.6788	1.01972	1.21672	1.25012	0.587398	1.32489	0.758266	1.14834	1.17605	0.94472	0.44797	1.14055	0.98893	1.18765	0.906492	0.806749	0.770019	0.773096	1.0375	1.02601	1.12386	1.07258	0.903402	0.720336	1.05314	1.08507	1.20171	1.18265
1221	27.6784	506.12	9-Methylsulfinylnonyl glucosinolate	2	1.19002	0.996245	0.940048	0.609078	0.918591	1.0064	1.01224	0.983443	1.16978	0.89852	0.984554	1.14478	0.888661	0.99728	0.752421	0.683463	0.456361	0.898399	0.858292	1.12511	0.990828	1.02833	1.15066	0.897248	1.08457	0.927662	0.759439	0.444012	0.908141	1.05033	0.724371	0.758196	1.00747	0.728466	1.36239	1.3011	1.01848	0.909339	0.845849	0.93562	0.615382	0.969139	1.28533	0.731619	0.789646
1227	28.0572	739.209			0.965165	0.896381	0.926698	1.04238	0.948801	1.04982	0.857026	1.13484	1.09716	0.744673	1.2696	1.18028	1.06112	0.83083	0.694846	0.835613	0.787392	1.22909	1.07344	1.06548	1.14581	0.770578	1.31766	0.865411	1.19419	1.02594	0.794614	0.556484	1.07753	1.15084	1.13608	0.979867	0.809686	0.718768	0.894883	1.03267	0.936707	1.02107	0.96763	1.20322	0.938207	1.16681	1.00897	1.19875	1.12375
1232	28.327	661.123			1.09454	0.915413	0.939961	0.964242	0.985995	0.924496	0.936656	1.06758	1.17662	0.884637	1.11935	1.04081	1.29824	0.979183	0.976352	0.77279	0.983463	1.03242	1.03354	1.08832	1.06341	0.954032	0.740158	1.14802	1.06553	0.95984	0.928291	0.751016	0.910619	1.14921	0.990874	1.00315	1.05164	0.765969	1.20047	0.986657	1.00003	1.05566	1.27642	1.01099	0.841342	1.18359	1.09364	1.02785	1.12328
1247	28.4182	579.16			1.03633	0.98145	0.984894	0.879325	0.993632	0.965533	0.966652	1.17556	1.12311	0.869406	1.15172	1.15177	1.29941	0.916782	0.817018	0.763304	0.923609	1.20335	1.07756	1.07793	1.14826	0.791932	0.966092	1.01991	1.11732	0.990144	0.924827	0.686742	0.983467	1.10158	1.05774	0.932204	1.02775	0.728254	0.949213	1.02481	0.990451	1.06159	1.21488	0.967069	0.797424	1.19675	1.09504	1.13136	1.20787
1270	28.4361	431.098			0.993462	1.05174	1.00691	0.849334	1.00156	0.980255	1.00783	1.20616	1.04746	0.891193	1.14863	1.1945	1.25894	0.897527	0.740008	0.789116	0.884489	1.27735	1.11393	1.03365	1.20007	0.722173	1.13867	0.944635	1.13455	1.01419	0.974789	0.675443	1.03703	1.05199	1.10869	0.854402	1.02598	0.721154	0.794651	1.05111	0.997571	1.0557	1.11376	0.954089	0.819263	1.18213	1.06118	1.1868	1.20298
1283	28.563	309.063			0.753701	0.963942	0.838463	0.724705	0.973344	0.969533	1.58316	1.01683	0.82668	0.8165	1.42643	1.49611	0.925006	0.884652	0.650246	0.743664	0.677142	1.27796	1.09398	1.10835	0.969627	0.848524	1.82249	0.819009	1.09803	0.914873	0.796234	0.756572	1.38724	0.898448	0.962915	0.842046	0.900725	0.743592	0.689307	1.2142	0.887249	0.919742	0.792649	1.03676	0.815861	1.21235	0.803718	1.0811	1.01943
1289	28.6344	919.24			0.839379	0.968413	0.880127	0.674526	1.01111	1.23756	1.14487	1.04743	0.743618	0.774931	1.33423	1.441	0.790816	0.792621	0.592345	0.673777	0.636145	1.31805	1.17665	1.21612	1.0334	0.749367	1.6463	0.820734	1.13512	1.00418	0.827643	0.695722	1.28879	0.91966	0.955575	0.834256	1.1179	0.64896	0.562981	1.1561	1.00208	1.01017	0.711543	1.07112	0.857138	1.35665	0.874312	1.39212	1.27066
1320	28.8328	427.097			1.02989	0.857102	0.927386	0.878651	0.928522	1.0874	0.985027	0.937426	1.08003	0.884707	1.18068	1.15895	1.09229	0.89054	0.855195	0.828394	0.89009	1.10007	1.06953	1.14851	0.896462	0.98316	1.01296	1.27771	1.0814	0.97798	0.889031	0.893822	0.963912	1.11058	0.944919	0.997044	1.18368	0.784255	0.906654	0.974048	0.980812	0.995964	0.971399	1.01164	0.962849	1.46552	0.998429	1.10268	1.20434
1332	28.924	193.05			1.02974	0.852609	0.99346	0.856891	0.93526	1.04183	0.961098	1.02075	1.07927	0.862337	1.11723	1.11169	1.09349	0.951599	0.836586	0.834631	0.874505	1.15536	1.05552	1.09231	0.952678	0.890478	1.09715	1.16867	1.02587	1.01608	0.882175	0.856972	1.00087	1.0693	0.959266	0.979799	1.11748	0.782005	0.869338	0.970927	1.00321	0.935515	0.996972	1.04928	1.00302	1.32797	1.07957	1.27652	1.31543
1335	28.9954	505.135			0.947982	0.753769	0.9911	0.555301	0.825602	0.955636	1.02241	1.20361	1.08809	0.763292	1.10487	1.09177	1.16338	0.949465	0.573925	0.720546	0.868711	1.31659	0.973255	1.06265	1.15028	0.685273	1.16884	0.988944	1.04593	1.29245	0.757121	0.562655	0.996635	1.07143	0.975471	0.919017	1.05583	0.548173	0.697359	0.898952	1.01289	0.909528	1.01605	1.18754	1.16321	1.39056	1.15454	1.8043	1.81446
1345	29.1402	340.077			0.98765	0.800848	0.828631	0.83799	0.871291	1.04886	0.981786	1.12008	0.980734	0.719078	1.30923	1.21113	1.10247	0.839965	0.597574	0.686328	0.705964	1.3315	1.06898	1.34107	1.22114	0.828003	1.19646	1.52991	0.999723	0.953296	0.606932	0.83741	0.962728	0.874139	0.878389	0.719367	0.977105	0.630014	0.656952	1.10612	1.03964	0.965012	0.90644	1.08738	0.927735	2.05855	1.03438	1.45216	1.13388
1349	29.1402	608.169			0.973445	1.14086	1.02351	0.813556	1.03902	0.963193	1.004	1.48907	0.974042	0.862683	1.3755	1.27839	1.31915	0.976242	0.732975	0.718043	0.908714	1.44613	1.09889	0.890101	1.52346	0.643394	1.30438	0.752637	1.03506	0.996235	1.04083	0.49666	0.95087	1.03856	1.07212	0.870362	0.942995	0.681704	0.756567	1.11122	1.09139	1.16864	1.17737	0.830112	0.640858	0.95576	1.19414	1.01454	0.994434
1374	29.7174	649.176			0.983832	0.846157	0.964144	0.914927	0.794671	0.941706	1.06259	1.17244	1.07784	0.81571	1.0657	1.07119	1.11079	0.827515	0.707948	0.683631	0.837788	1.27049	1.02418	1.24678	1.01656	0.848652	1.22014	1.0251	1.15593	1.12254	0.880288	0.680732	1.10966	1.10898	1.01711	1.02276	1.06484	0.552279	0.763351	1.09378	0.978982	0.923975	0.984474	1.15881	0.96472	1.41876	1.09065	1.23886	1.46843
1379	30.5108	447.094	Kaempferol 3-O-glucoside	1	1.29967	1.1427	1.07726	0.64698	0.96884	0.20647	1.25212	1.26688	1.01313	0.888229	1.45227	1.13528	1.27705	0.755974	0.647959	0.849139	0.892199	1.69536	1.04122	1.11858	1.26623	0.475381	1.29451	0.87327	1.01179	1.14381	0.943396	0.459042	1.0744	1.02194	1.09892	0.840325	0.852461	0.805601	0.801712	1.03281	1.12323	1.18738	1.1011	0.886732	0.673485	1.14006	1.19689	1.21541	1.2481
1382	30.8539	447.094			1.15856	0.87657	1.25608	0.602329	0.937169	0.872883	0.952513	1.29554	1.0612	0.845147	1.12609	1.12618	1.31475	0.845997	0.773658	0.797139	0.894563	1.66127	0.96838	1.28082	1.29068	0.583425	1.34108	0.783643	1.34972	1.27963	0.86928	0.449629	1.07913	1.08803	1.32498	0.77406	0.831972	0.774936	0.697798	0.982104	1.08479	1.02825	1.12514	1.04131	0.748749	1.06551	1.11166	0.931277	1.26639
1384	31.1792	1180.29			1.03282	0.981321	0.99604	1.01015	1.01144	0.975605	0.915358	1.04828	1.04755	1.02055	1.03594	1.05481	0.926745	0.970608	1.00282	0.950825	0.935932	1.10978	1.00997	1.02033	0.942526	1.02075	0.980559	0.948759	0.981361	0.999136	0.992713	0.955109	0.944992	1.008	0.942128	0.957221	0.988162	1.05211	1.06059	0.99861	1.05139	1.0448	1.00019	0.960542	1.05067	1.07568	0.975719	0.957901	0.996786
1386	31.3419	478.108			1.02727	0.949093	1.25528	0.804042	0.976357	0.925664	1.04323	1.34869	0.947138	0.833738	1.0348	1.11601	1.26936	1.01934	0.707915	0.966158	0.974449	1.88006	0.991487	1.11826	1.33932	0.517919	1.33742	0.716627	0.853261	1.16694	0.982545	0.371287	1.08049	0.944821	1.19978	0.911919	0.850896	0.845235	0.90295	1.04392	1.03825	1.15351	1.1425	0.721612	0.644552	1.02912	1.04774	1.30159	1.12379
1390	31.919	402.09	Hexyl glucosinolate	2	0.876874	0.911089	0.816298	0.983767	0.963858	1.07169	0.882186	1.16196	1.06612	0.898287	1.28458	1.03592	1.10315	0.971512	0.626752	0.659995	0.684109	1.12313	1.38544	0.974848	1.11584	1.53534	0.903852	0.885888	1.39184	0.971827	0.731303	0.304837	1.20072	1.02935	0.836226	1.46288	1.22367	0.880667	0.858874	1.29291	1.13968	0.912159	0.983645	0.959803	0.784866	1.14905	1.32148	0.821357	0.855901
1393	32.4963	1058.39			1.17072	0.813787	0.935281	1.07498	0.85827	0.831176	0.420524	1.3266	1.12464	1.05581	1.37423	1.2055	1.10858	0.99767	0.761803	1.12891	0.582022	1.14455	1.21078	1.04981	1.27812	0.825839	1.05017	0.890128	0.850996	1.06993	0.813691	0.214234	1.18696	1.13441	0.838313	1.68368	0.747535	0.791101	0.769057	1.05295	1.23081	1.02943	0.723142	0.893403	0.950243	0.986266	0.926855	0.845452	0.776986
1396	33.0377	419.093			0.961275	1.02815	0.955437	1.07464	0.898815	1.00109	1.09579	1.00132	1.08759	1.06785	1.06918	0.939671	1.03497	0.950141	0.995821	1.00376	1.01732	0.946982	1.01939	0.963239	1.05756	0.928177	1.03856	1.07819	0.957144	0.959791	1.02666	0.936135	1.06624	1.03367	0.929524	0.952098	0.931959	0.976817	0.987816	1.00322	0.96007	1.05526	0.999674	0.977256	1.0026	0.948338	0.933099	1.00332	0.904676
1400	33.3451	533.26			1.01658	1.00502	1.01304	0.960788	1.02824	1.06604	0.971542	0.981415	0.994894	1.04163	0.971598	0.965672	1.01286	0.954535	1.011	1.02824	1.01503	1.01427	0.957324	0.978494	1.0047	1.031	0.989366	0.992704	1.0449	1.03023	1.00771	0.977169	0.93852	1.03843	0.999756	0.988137	1.03763	0.975116	1.0694	1.01755	1.05039	1.00798	1.00365	0.929737	0.992603	0.946987	0.91351	1.03082	1.00959
1405	33.7061	592.174			1.03002	0.804224	0.879492	0.899556	0.968777	1.19138	0.944852	0.983275	1.10874	0.947465	1.09832	0.914751	1.06305	0.915644	0.8871	0.849299	0.889733	1.03219	0.888069	0.828227	0.93704	0.919936	1.0888	1.3188	0.995683	1.02625	0.78981	1.11937	0.900925	1.03731	1.03547	0.828211	1.37739	0.751491	0.895804	0.834366	1.00567	1.02286	1.00884	0.906181	1.05719	1.37854	1.1671	1.2384	1.24203
1407	33.7061	1040.36			0.997311	1.01764	0.243693	1.03245	0.320632	0.959259	1.0464	1.01501	1.49677	0.472253	0.973915	1.06391	1.88701	0.891404	0.334449	0.979791	0.575576	0.972893	0.340488	1.00687	0.994523	0.346506	0.670654	0.731222	1.00141	0.997968	1.04476	1.02226	0.523371	1.33373	1.06062	0.977503	0.967216	1.01786	0.598167	0.315792	0.967173	0.979202	0.605788	0.950465	1.0056	1.52649	0.986685	1.0415	0.991408
1412	33.8509	419.136			1.07261	0.679228	0.833723	0.628714	0.986111	1.0589	1.04135	1.2435	1.11032	0.754815	1.22092	1.06987	1.2123	0.924538	0.678995	0.570381	0.770982	1.30718	1.00802	0.932583	1.21412	0.664213	1.13552	0.829895	0.993289	1.02062	0.712681	0.839102	0.816388	1.17285	0.918659	0.879518	1.0551	0.587023	0.585746	1.05598	0.960449	0.937337	0.988771	1.00611	1.15658	1.18401	1.14535	1.96637	1.83214
1419	34.2298	509.054	4-Methoxy-3-indolylmethyl glucosinolate	2	0.766847	0.450361	1.05989	1.05963	0.76736	0.938619	1.39249	1.09584	0.905789	0.537909	0.735534	0.857133	1.1201	0.919356	0.761217	0.720332	0.808755	0.841537	0.827514	1.56305	1.05402	1.0887	0.877309	1.37069	0.963206	1.06813	0.442885	0.450441	1.1441	0.97431	0.649275	0.808024	0.909937	0.612421	0.767953	0.931666	0.936547	0.783989	1.29307	2.2362	1.02956	1.64523	1.27065	1.1506	1.43753
1421	34.6443	431.099	kaempferol-deoxyhexoside	2	1.05044	1.01783	1.19353	0.834975	0.796506	0.941687	0.959278	1.52951	1.1279	0.863245	1.08815	1.05461	1.50176	0.804584	0.705171	0.886503	0.976297	1.75663	1.01162	1.18934	1.56112	0.508348	1.4985	0.773625	0.853804	1.19779	0.95599	0.473357	1.15461	0.978067	1.19296	0.795817	0.71942	0.712158	0.601403	0.872309	0.920031	1.00733	1.05778	1.00658	0.776597	1.10247	0.982376	1.21506	1.56129
1429	35.3306	461.109	kaempferide 3-hexoside	2	0.948483	0.915649	1.33676	0.952145	0.951259	0.963417	0.91778	1.48377	0.937733	0.786328	1.093	1.1285	1.28359	0.935433	0.732004	0.856519	0.952549	1.98329	1.06033	1.10225	1.49177	0.580373	1.49648	0.699041	0.861993	1.20373	0.966307	0.465436	1.06813	0.94769	1.19779	0.734403	0.80651	0.78353	0.747216	0.854165	1.00881	1.03206	1.12998	0.846864	0.655206	1.0304	1.12424	1.24126	1.4125
1438	36.4672	719.265			1.05407	1.0493	1.23772	0.841331	1.03851	1.10793	0.542248	1.82682	0.918047	0.984251	1.33578	1.1008	1.15209	1.17561	0.502455	0.813344	0.892705	1.79477	1.02222	0.941062	1.7647	0.478628	1.54569	0.749261	0.886088	1.26881	1.04061	0.282491	1.11819	0.955951	1.10873	0.932813	0.816908	0.772125	0.778268	1.17186	0.992421	0.966578	1.13004	0.751982	0.756513	1.08825	1.21865	1.25916	0.920371
1443	36.5583	690.266			1.01956	1.04334	1.25782	0.826828	1.03622	1.10145	0.536057	1.86482	0.918514	0.970724	1.33806	1.06417	1.1331	1.18782	0.475002	0.798871	0.907761	1.87263	1.01599	0.93598	1.80296	0.454126	1.57673	0.734005	0.923841	1.28719	1.05299	0.277368	1.13907	0.942156	1.09876	0.902656	0.851867	0.74975	0.735849	1.16189	0.984389	0.957245	1.14111	0.71339	0.758097	1.10827	1.21438	1.27517	0.955401
1444	36.721	521.222			0.930164	0.948478	0.935949	0.969443	1.01492	0.961811	1.1858	0.959785	0.958565	0.948139	0.925992	0.982078	0.949061	1.01488	0.950399	1.03586	0.93029	0.954425	0.961067	0.976714	0.938479	0.941179	1.00024	0.998301	1.03327	0.908905	0.964001	1.05366	1.03305	1.0486	0.962716	0.901043	0.960791	0.888792	0.950381	0.903512	1.03671	0.870768	1.05289	0.9777	1.1762	0.991484	0.98606	1.02008	1.23673
1448	36.8103	591.171			1.06018	0.79901	0.968297	0.544419	0.854794	1.34967	0.928045	1.00926	1.06251	0.848332	1.31406	1.1241	1.19584	0.775086	0.717573	0.58767	0.620982	1.22582	1.0154	1.32658	0.972788	0.885754	1.00617	0.96525	1.12192	1.09093	0.795953	0.88888	0.968951	1.09912	0.998021	1.01694	1.1634	0.703234	0.653246	1.20899	1.0257	1.06614	1.02845	0.759641	0.837014	1.25797	1.04816	1.46983	1.25423
1451	37.9487	734.291			0.961486	0.917265	0.471963	1.05973	0.720908	1.01469	0.833054	1.37642	1.5421	0.806472	0.90613	1.01504	1.29011	0.687406	0.543935	0.633121	0.682425	0.711067	0.623658	1.45361	1.31276	0.982581	0.666064	0.691135	0.78598	1.01812	0.536579	0.375329	0.818049	0.631892	0.777642	0.676729	0.574884	1.00704	0.786071	0.877677	0.930373	1.31236	1.07791	0.760389	1.63064	0.757277	1.51804	1.00343	0.511394
1454	38.1471	724.347			0.958938	1.01852	0.981409	1.04403	1.06841	0.969402	1.06298	0.942112	1.01981	0.988613	1.09759	0.958332	1.07068	0.946457	1.03248	1.04648	1.03846	1.0101	0.941862	1.01438	0.954209	0.985628	0.986458	0.965717	0.964307	0.939481	0.904552	0.901958	0.988094	1.03265	1.01996	1.00604	1.02522	0.981455	1.0383	1.05269	0.95733	1.03253	0.931895	1.06141	0.890407	0.997983	0.98805	1.02099	0.971296
1455	38.3276	401.125			1.037	0.994566	1.00504	1.02991	0.94526	0.91251	1.01195	1.05631	1.10616	1.05083	0.983068	0.986233	1.04411	0.984029	1.00361	0.916491	0.967575	1.00581	1.04009	0.961111	1.05212	0.915544	0.982551	1.01597	1.05706	0.987767	0.957039	0.954185	0.973133	0.975831	0.995867	0.931447	0.985229	0.968634	0.989209	0.964642	0.9915	0.980969	0.984982	0.925207	1.02962	1.0077	1.05641	1.02524	1.07879
1460	38.5438	732.274			1.03109	0.91755	0.459126	1.06185	0.628076	0.946995	0.861203	1.3353	1.59937	0.703897	0.874832	1.07317	1.37681	0.781926	0.589817	0.62206	0.52806	0.688311	0.630848	1.53439	1.09032	0.734093	0.565543	0.639682	0.863622	0.989719	0.540136	0.361271	0.811361	0.633612	0.78498	0.757148	0.617275	0.986743	0.970845	0.834433	0.953061	1.14679	1.0617	0.728779	1.61889	0.673794	1.54297	1.07065	0.499662
1465	38.9048	734.291			1.09283	0.922226	0.45813	1.05246	0.688051	0.917926	0.655628	1.3623	1.56011	0.77193	0.937079	0.697571	0.933113	0.757337	0.545377	0.638954	0.645626	0.786214	0.615092	1.41708	1.31555	0.940908	0.614784	0.667698	0.826828	1.04799	0.564447	0.422105	0.790139	0.66402	0.737369	0.719889	0.645577	0.986993	0.698231	0.806265	0.957684	1.30567	1.04459	0.734596	1.68096	0.74532	1.57262	1.04036	0.540391
1468	39.591	371.116	feruloyl malate conferyl alcohol conjugate	4	0.928368	0.626458	0.988203	0.918088	0.801681	0.952589	1.18546	0.890194	0.976818	0.74455	1.16663	0.934607	0.915614	0.800454	0.736812	0.678214	0.75089	0.845815	1.02881	1.80964	0.821395	0.927014	1.01355	1.12497	0.869945	0.929152	0.658284	0.670945	1.27415	1.15633	0.742086	1.09978	1.1742	0.681562	0.936462	1.18085	1.01196	0.778055	0.813889	1.12018	0.901828	1.15086	1.03451	1.13758	1.15744
1491	39.6446	733.28			1.10281	0.971625	0.933787	0.955129	1.00957	1.09785	0.63369	1.13928	1.07842	0.931661	1.27513	1.18039	1.28323	0.982084	0.69518	0.723797	0.742462	1.29693	1.12804	1.09423	1.09687	0.795444	0.965931	0.947406	1.20976	0.974845	0.871092	0.312509	0.97795	1.15491	1.06634	1.10449	1.03785	0.918286	1.06326	1.15916	1.04575	1.01835	0.964296	0.780445	0.829654	1.09371	1.15206	0.977585	0.878494
1516	39.716	704.28			1.10276	0.940518	0.948268	0.91867	0.975567	1.12037	0.6448	1.20536	1.07141	0.90902	1.27097	1.14026	1.26541	0.992002	0.697834	0.730307	0.761089	1.32187	1.11717	1.06084	1.16253	0.774958	1.01766	0.937609	1.16572	0.988831	0.899931	0.324332	0.973715	1.1309	1.07619	1.06364	1.05396	0.897961	0.997619	1.14118	1.02513	0.989931	0.985794	0.771292	0.831484	1.10208	1.14305	1.01749	0.933983
1522	40.4023	494.079			0.98922	1.0009	0.824701	1.21563	0.883576	1.03311	0.914131	1.02382	0.911439	0.889483	1.12632	0.943823	1.11792	0.802453	0.708396	0.764367	0.891772	1.30882	0.861123	0.988025	1.12009	0.743117	1.49938	1.68255	1.02531	1.00792	0.948486	0.800628	0.9338	1.05098	1.0957	0.850514	0.868015	0.820028	0.760277	0.815886	0.81674	1.2449	0.900286	0.811601	0.680405	2.1151	1.05532	1.17792	1.7814
1524	40.5471	165.981			1.32396	0.678437	1.09333	0.468767	1.036	2.22424	0.646133	2.08134	1.01324	0.589196	0.553289	1.81098	0.965667	0.197163	1.6304	0.762945	0.371709	1.09586	1.15267	0.37331	2.09579	1.22402	0.52656	1.0413	1.21778	1.06788	0.742843	0.558136	3.00101	1.42013	1.62668	0.484621	2.23323	0.39476	0.560196	2.12547	0.755877	0.590306	0.580912	0.768591	0.42332	0.685135	1.48669	0.96845	0.93858
1528	41.9732	417.11			0.888445	0.991963	0.718906	0.837596	1.018	1.13229	0.822001	0.982413	0.878404	0.964351	1.16245	0.988847	0.939159	1.18603	0.706043	0.77472	0.630224	1.23937	1.21844	1.0246	0.988896	1.97479	0.827134	0.909698	1.43673	1.0214	0.661365	0.219915	1.2303	1.08236	0.703338	1.20681	1.54152	0.826628	0.80135	1.56208	1.17638	0.86657	0.907235	0.693272	0.665114	1.28899	1.45146	0.877043	0.848289
1530	42.1001	179.11			0.95708	0.803657	0.834501	1.08319	0.944196	0.985805	0.922182	1.15102	0.973498	0.843547	1.43956	1.16202	1.34775	0.924687	0.777342	0.772727	0.754536	0.803589	0.89519	0.938545	0.895981	0.784426	1.02873	0.976235	1.1262	1.0609	0.787042	0.760433	1.34032	1.02633	0.925557	1.39341	0.746078	0.854926	1.17661	1.12712	0.986734	1.13688	0.833562	1.21075	0.829077	1.3251	0.74562	1.06474	0.817003
1534	42.5504	661.306			0.980762	0.949992	0.956691	1.00129	0.969814	0.939108	0.993751	0.964487	0.965848	0.963485	1.03796	1.02612	1.01324	0.941242	0.979021	0.960629	0.992657	0.980121	0.987458	0.981276	1.01286	0.97316	1.02741	0.996274	1.0145	1.00364	0.944759	0.960237	0.955495	1.07693	0.949225	0.974377	0.93832	1.04908	1.03853	1.05935	1.06603	0.994034	0.994014	0.978959	1.03513	0.954505	0.99862	0.949416	1.04168
1537	42.7487	749.311			1.07009	1.0304	0.751408	1.11099	0.989228	1.32628	0.403809	0.815299	1.16408	1.03096	1.63457	1.17386	1.22762	0.83723	0.514392	0.55698	0.420234	1.26015	1.29335	1.1389	0.778235	0.823624	0.883148	0.877121	1.97913	0.865521	0.614065	0.249984	0.95364	1.41207	0.91068	1.33176	0.742051	1.09885	1.14089	1.36523	0.98188	0.985149	0.602968	0.712015	0.70549	1.03297	1.09569	0.706807	0.50817
1540	43.2902	688.286			1.01537	1.04272	0.862198	0.768127	0.922493	1.22661	0.573565	1.51288	0.954708	0.90975	1.3659	1.13431	1.17793	1.00271	0.510316	0.6776	0.746915	1.67467	1.16476	0.979479	1.44243	0.623945	1.24761	0.768959	1.06364	0.97347	0.94672	0.179004	0.951244	1.06792	1.10102	0.979423	0.885478	0.860674	0.86306	1.14403	1.10731	0.915501	0.873791	0.690484	0.760579	1.13727	1.235	1.09195	0.86073
1544	43.7245	479.093	7-methylthioheptyl glucosinolate	2	1.0512	0.953854	0.816162	0.893748	0.996438	1.0545	0.889777	1.14076	0.967575	1.08658	1.03043	1.15549	0.885085	0.86709	0.833517	0.852699	0.929971	0.99961	1.22039	0.984326	1.05941	0.902529	0.930124	1.50806	1.0255	0.927914	0.926296	0.787634	0.91572	1.01637	0.88257	0.972268	1.16528	0.948665	0.923569	1.34726	0.940276	1.00045	0.991888	0.859644	0.685392	2.06875	1.14119	1.00251	0.840128
1545	43.9586	253.094			1.04116	1.01927	0.986575	0.95231	0.98113	0.985135	0.99755	1.0142	0.969219	1.01343	0.930119	0.986992	0.973932	0.989808	1.01058	0.98864	0.942551	1.08248	1.03082	1.06586	0.997675	1.0148	1.03845	1.02163	0.959985	1.01492	1.01717	0.926365	1.01016	0.968153	0.992614	1.0612	0.95395	0.998157	1.00914	0.985236	1.0256	0.960897	0.995658	1.0485	1.0187	0.976593	0.992842	0.998973	0.982597
1550	44.7163	517.266			1.10771	1.00978	0.992441	0.969017	1.00021	0.904116	1.03698	0.996303	1.08224	0.950805	0.954242	0.993944	0.964215	0.929397	0.924785	0.941391	0.966811	1.07504	1.01835	0.934693	1.10583	1.01182	1.05133	0.955553	1.04753	1.00555	1.01381	0.96025	1.04143	1.0072	0.984205	1.04487	1.04811	1.0428	1.02196	1.02244	1.01994	0.914601	1.02993	0.998476	0.978947	1.00863	1.11834	0.996562	0.915086
1552	45.474	271.062			0.754336	0.925037	0.695364	0.922988	0.875896	2.05078	0.736186	1.20649	0.922995	0.959324	1.59861	1.15208	0.986755	0.614973	0.445306	0.828433	0.605101	1.57895	0.874332	0.911943	1.18864	1.05955	1.16272	0.810595	0.809678	0.888272	0.947554	0.414937	1.34187	1.51488	1.31156	0.853773	1.63051	0.8031	0.81514	0.90929	0.64698	1.0245	0.678749	0.671753	0.6091	1.04892	1.47199	0.794658	1.19616
1556	45.6367	518.269			1.03152	1.05096	0.982331	1.00095	1.06154	1.00027	0.957891	0.967983	1.02177	1.04349	1.01862	1.00525	0.986965	1.00148	0.997173	1.03961	0.980697	1.03762	1.02935	1.01926	1.00788	1.0383	1.00048	0.987968	1.00028	1.07099	0.992538	0.951257	1.02261	0.957319	0.964659	0.924382	1.0366	1.00712	0.968155	0.996107	0.958296	0.967229	0.958778	0.999073	0.992975	0.950682	1.00245	0.93987	1.02754
1559	47.0628	245.156			0.975689	1.01547	0.989951	1.01008	1.00263	1.00151	0.989631	1.03433	0.984579	0.992493	1.00903	1.02558	1.03262	0.986356	1.00732	0.999096	0.994304	0.985101	0.996105	1.01719	0.955718	1.00682	1.02384	1.03268	1.00386	1.01348	0.999639	0.964513	0.993414	0.987255	0.999155	0.992903	1.01713	0.973066	0.992681	1.02966	0.989051	1.01228	1.00616	1.00246	1.0117	0.973159	1.00595	0.994138	1.02872
1577	47.154	673.296			1.23299	1.18791	0.518117	0.509274	1.01063	1.28157	0.443559	1.63047	0.584854	0.844253	1.53151	1.31882	1.27489	1.07966	0.386369	0.865707	0.478699	1.73813	1.11059	1.07067	1.61763	0.404136	1.31191	0.878896	0.599966	1.0471	1.07003	0.194469	0.571316	1.00697	1.28016	1.00946	0.537268	0.840984	0.774121	1.16029	1.18474	1.02467	0.889265	0.462041	0.845961	1.25763	1.32802	1.27454	0.57341
1584	50.2224	531.217			1.00079	1.02528	1.02965	0.936371	1.0436	0.978378	0.916987	0.961749	1.05026	1.00774	0.993197	1.02013	1.06195	0.994442	1.00913	1.10011	0.957777	1.03382	0.966233	1.00163	0.943375	0.953852	1.05365	0.975955	0.981666	1.01655	0.98724	0.945406	1.00803	0.96422	0.917289	1.05676	0.964183	1.02748	0.921845	0.931878	1.09912	1.06866	0.998951	1.01605	1.04878	0.963807	0.891829	1.0197	0.955499
1590	50.5279	736.347			1.00556	1.01782	0.979987	0.94887	0.99417	1.03124	1.01864	0.96029	0.992925	1.03134	1.03744	0.988149	1.05852	0.997398	0.976071	1.03584	1.0118	1.02006	1.05206	0.978808	1.00145	1.02001	1.00006	1.00621	1.00535	0.980651	1.05947	0.989969	0.999216	1.00259	0.991962	0.995073	0.985437	0.972621	1.03346	1.0279	0.968371	1.00392	1.01497	0.972014	0.991794	1.00888	1.04279	0.957213	0.967153
1594	50.871	611.343			0.879268	1.48548	0.61309	0.923854	0.510515	1.58396	0.871082	1.48421	1.2397	0.77756	1.46451	1.44155	1.90945	0.573857	0.233488	1.38005	0.530721	0.976925	0.718335	1.2072	1.54714	1.06443	0.954002	1.33725	0.818514	0.817728	1.43281	0.40405	1.02932	1.78715	1.62405	0.888727	1.39982	1.24917	1.00932	0.709996	0.648668	0.991563	0.759074	0.856369	0.604055	1.19614	0.912209	0.503826	0.896908
1596	50.9801	531.274			1.01715	0.746852	0.759542	1.7122	0.721127	0.883401	0.976917	0.65587	0.834253	1.16563	1.88547	1.69946	0.887928	0.805081	0.876585	1.19444	1.38362	0.678525	0.810832	1.37084	0.743729	1.3701	1.21587	0.770422	0.669721	0.776052	0.710716	1.12155	1.08135	0.882049	0.721532	1.68994	0.716697	0.758751	0.787144	0.817749	0.961155	0.701892	0.832494	0.639577	1.40321	0.805831	1.74509	1.67846	0.750015
1600	51.1249	473.221			1.02862	0.773784	1.16563	0.947371	0.912714	1.01401	1.09293	1.03321	0.89581	1.10677	1.01951	0.840913	0.886444	0.900739	1.10365	0.72561	0.979677	1.28756	1.1027	1.24614	0.767992	0.893849	0.960919	0.965923	0.867556	1.04029	0.745775	0.845754	0.934217	0.864056	0.808148	2.05877	1.09788	1.05758	0.993626	0.835913	0.945744	0.727453	1.36729	0.80607	0.917069	1.10776	1.1679	1.13489	0.866823
1609	51.2141	703.243			1.05003	0.95243	0.523018	1.29933	1.98988	1.23533	0.706715	1.23887	2.06596	0.943884	1.06785	0.924223	0.467801	0.420866	1.96211	0.932504	0.367815	0.986376	1.43043	1.02734	1.03449	0.527958	0.420101	0.562525	1.01204	0.76411	1.01532	0.857465	0.580072	0.420758	1.09085	1.00985	0.921812	0.992566	0.596762	2.34168	0.735784	0.985429	0.365376	0.932443	0.388332	0.400753	1.05967	0.981721	0.969824
1619	51.2677	615.198			0.912111	1.4295	0.939201	1.08371	0.970249	0.997937	0.985665	0.907427	0.857461	0.885605	1.41481	0.944957	1.10288	1.05824	1.07626	1.16857	1.02052	0.93355	1.03688	0.942185	0.988059	0.927066	0.887242	0.88726	0.961255	1.07439	0.960804	1.28779	1.1044	0.885106	1.00184	0.915758	0.95387	0.962727	1.05122	0.996576	1.0081	0.965963	0.914937	0.981592	1.08804	0.949045	0.982228	0.925705	1.00525
1624	51.3232	735.242			1.05201	0.969992	0.471086	1.00399	2.2557	1.03955	0.901973	1.0102	1.43054	0.692105	1.09727	1.00335	0.359891	0.368232	1.90966	0.978285	0.346013	1.06047	0.940033	1.0003	1.01417	0.456958	0.371447	0.477435	1.05335	1.01872	1.04016	0.945113	0.38151	0.369754	0.995077	0.983448	1.04431	0.9998	0.364621	3.08265	0.960486	0.991173	0.355084	0.927504	0.346634	0.358867	1.01779	0.957669	0.985061
1636	51.3589	726.377			0.919268	1.29499	0.927119	1.01392	0.963709	0.984075	0.99872	0.958864	0.888462	0.885524	1.32165	0.94867	1.04507	1.09195	1.0134	1.08339	0.962631	0.985837	1.01568	0.952362	0.956167	0.985799	0.9263	0.91521	0.986462	1.08797	0.92997	1.17129	1.02598	0.932413	0.946802	1.04115	0.898085	0.894182	1.03961	0.987416	0.980469	0.933142	0.93555	0.98641	1.04518	1.11349	1.01796	0.916589	0.966255
1651	51.4304	505.257			0.898826	0.804149	0.621365	0.919335	0.397319	0.941983	1.00243	2.31112	0.514636	0.526783	0.824806	0.373588	0.757682	0.603458	1.19348	0.349065	0.464315	2.93923	0.5314	0.93394	0.51067	0.413508	0.600573	0.711213	2.13644	0.977632	0.385452	0.243349	0.558551	0.653112	0.391907	2.44833	1.50823	0.297396	3.17643	0.473058	0.965791	0.371424	0.945981	1.28021	0.512646	4.99085	0.746726	0.395878	0.445922
1657	51.5394	657.382			0.921644	0.971173	0.93948	1.00782	1.02738	0.987779	1.03778	1.33444	1.16608	0.834291	2.24137	0.533147	1.28162	1.14987	1.01961	0.406555	1.24807	1.72884	1.12922	0.918197	1.1982	0.73728	0.776999	0.72752	1.06251	1.00418	0.516758	0.415335	0.977157	0.824809	1.10352	1.2301	1.61098	0.434889	1.17884	1.06627	1.06512	1.32593	1.55913	0.383905	0.814508	1.16974	1.82557	0.302566	1.77903
1671	51.6842	487.233			0.857019	0.945092	1.04282	0.750061	0.875309	0.821464	0.818796	1.17402	1.19802	0.865065	1.58923	1.08224	1.09894	1.37977	0.800092	0.686373	0.906921	1.49355	0.899461	1.09285	2.0373	0.608318	1.21956	0.741767	0.710876	1.19518	0.664171	0.67862	0.933299	1.40117	0.692494	1.50328	0.721311	0.651591	0.965495	1.05088	1.06407	0.683154	0.606679	0.672343	0.812161	1.10468	1.49854	0.85344	0.798103
1673	51.6842	1239.52			1.04641	0.958776	0.293672	1.99774	1.9845	1.67638	0.276161	0.868223	2.99951	0.939863	0.854457	0.812231	0.290352	0.285862	1.93933	0.862078	0.294417	0.907337	2.706	0.965654	0.955412	0.410101	0.269208	0.29977	1.0422	0.252516	0.934574	0.847486	1.4793	0.262361	1.0699	1.01191	0.980634	0.958127	1.37588	1.76913	0.260891	0.915371	0.285742	0.883827	0.289059	0.336406	0.872994	0.913061	0.933411
1680	51.7735	477.113	8‐Methylthiooctylglucosinolate	2	1.02573	0.771296	0.719185	1.03128	1.21847	0.99077	0.621609	1.18889	1.00681	0.845122	1.14388	1.14068	0.761424	0.904633	0.769244	0.733998	0.884568	1.09556	1.08428	1.13768	1.15569	0.915868	1.068	1.24059	0.894002	0.911672	0.90577	0.602348	1.10986	1.32304	0.846387	1.13824	1.05491	0.826931	1.00476	1.45703	0.929758	1.00847	0.772498	0.758798	0.706646	1.72361	1.32279	0.987153	0.92583
1691	51.8092	847.48			1.95334	0.382437	1.63885	0.862398	3.42566	0.562769	0.486359	0.387883	0.491221	3.67606	0.372611	1.38597	1.70993	0.617118	0.740392	0.375776	0.379972	0.481097	0.369788	0.377705	0.38156	0.504381	0.348442	0.362082	0.391675	1.24071	2.30353	1.40572	0.359382	0.377659	0.393191	1.12505	2.65588	0.384562	0.361183	1.69379	1.38653	4.41047	0.347315	0.398573	0.362983	0.347229	0.372225	0.382812	0.371186
1695	51.8647	492.104			0.966544	0.611085	0.67688	0.839889	0.79681	1.26037	0.835333	1.21732	0.962566	0.90226	0.901547	1.16281	0.95252	0.901338	0.617319	0.785078	0.696599	0.92871	0.797652	1.09009	1.11475	0.986097	1.38268	1.62519	0.946585	1.06417	0.868834	0.619683	1.33272	1.1064	0.661244	0.900821	1.1681	1.27093	1.06367	0.741016	0.826964	0.965308	1.41364	0.751731	0.667431	1.9025	1.54981	1.14259	0.858178
1704	51.9361	809.493			0.854178	0.422907	0.280263	0.965675	3.07247	1.07563	0.849145	0.591085	1.93451	0.28506	0.410423	0.584189	0.307435	0.349	2.89685	0.449754	0.581777	1.25407	0.385393	0.565097	0.342074	1.40477	0.299594	0.334608	0.701102	1.57975	0.452337	0.354056	0.288063	0.266835	0.354024	0.359947	0.47809	0.363032	0.265544	1.95308	0.824971	0.939591	0.255495	0.347273	0.279672	0.327314	0.658855	0.342892	0.363139
1715	52.1166	649.343			0.90094	0.897146	0.964725	1.36262	1.02335	0.912283	0.95893	0.919117	1.4251	1.15239	1.22688	0.915886	1.13213	0.847873	1.49764	0.958173	0.877386	0.963628	1.27983	0.87905	0.844954	0.801881	0.883998	0.982719	0.911611	0.924486	0.939812	0.947422	0.876802	0.954899	0.992604	0.993874	0.947229	1.78562	0.892142	0.837195	0.967803	0.927211	0.860334	0.940986	0.92736	0.834244	0.953078	0.906348	1.10448
1720	52.2078	236.107			0.758596	0.223294	0.898159	0.666937	0.790109	1.32787	0.798688	1.48531	1.27633	0.863097	0.443114	0.860382	1.70191	0.968464	0.697089	0.278535	1.31041	0.857666	0.634477	0.753407	1.42666	0.355335	1.04127	1.56318	0.474343	0.747325	1.44944	2.67125	1.26238	1.7113	1.25646	1.96978	1.68132	0.236322	1.29735	1.22504	1.08593	1.62017	0.401994	0.470434	0.892347	0.847356	0.810514	0.828927	0.870333
1722	52.2078	601.324			1.04457	0.965811	0.845575	0.843358	0.778716	1.12697	0.873272	1.03724	1.2869	0.75126	1.07113	1.04991	1.50475	0.986392	0.934014	0.873029	0.956233	1.01873	0.941319	1.0136	1.05153	0.914793	0.854811	1.39288	0.887835	0.951885	1.06432	1.00237	0.91356	1.2699	1.04909	1.06722	0.999724	0.864995	1.17109	0.958082	1.00595	1.04627	1.39177	0.895026	0.891141	1.0819	0.978703	1.02792	1.04757
1724	52.2435	997.554			1.35941	0.979455	0.684875	0.717301	3.56192	0.769012	1.15674	0.946713	0.73396	1.07432	0.924496	0.96693	0.668524	0.641954	0.748952	0.985134	0.585355	0.960528	1.40311	0.940741	0.953156	0.613192	0.627058	0.607577	0.934612	1.58172	1.39497	0.992649	0.631374	0.681589	0.932045	0.976377	1.84513	0.900552	0.69033	3.24182	0.719135	1.01589	0.645569	0.934557	0.614867	0.660712	0.958446	0.972596	0.910115
1730	52.315	753.406			1.16371	1.00584	0.381815	1.01865	1.01026	1.59864	0.754369	0.987694	4.27697	0.490782	0.92721	1.00718	0.762565	0.292172	2.68776	1.01217	0.275309	0.962103	0.340034	1.24364	0.938713	1.92999	0.290737	2.06579	1.0689	0.739487	0.992324	0.898594	0.323141	0.263687	1.16973	0.92208	0.936806	1.02809	0.355573	1.101	0.725513	0.913609	0.271961	0.95108	0.280719	0.262348	0.910886	0.9499	0.93645
1744	52.4776	722.373			1.01955	0.989289	0.93924	1.59652	1.20468	0.813246	0.73995	0.722865	1.06067	0.749099	0.756119	1.11295	0.909062	0.683372	0.803242	0.720652	0.974903	1.25539	1.09295	1.11124	0.716424	0.72705	1.40867	1.35921	1.07593	1.01669	0.94616	0.693935	0.789246	1.55043	1.02364	1.24918	1.01514	0.992522	0.827048	1.14284	0.710314	1.32539	0.78005	0.659896	0.673337	1.50249	1.24082	0.888791	1.63181
1769	52.8743	502.295			0.917838	1.0876	0.951334	0.880246	0.981991	1.16678	0.951014	0.884835	1.03513	0.927131	1.05032	1.27291	1.14945	0.968323	0.562327	0.698097	0.733943	1.46773	1.10555	1.51054	0.891608	0.74769	1.32707	0.976542	1.56708	0.972572	1.00482	0.328126	1.12141	1.12851	1.26609	0.961905	1.1033	1.07507	0.813559	1.33964	0.895191	0.878826	0.974839	0.707046	0.938318	0.940158	1.39282	1.00509	0.714027
1774	52.9298	309.207			1.00942	1.03243	0.977711	0.97842	0.925839	1.06443	0.974832	0.93304	1.07756	0.952775	1.02261	1.16614	1.08685	0.973453	0.798071	0.867934	0.891384	1.21128	1.07424	1.26781	1.02737	0.91022	1.16588	0.999412	1.25557	0.945374	1.01716	0.799124	1.02681	1.11887	1.14109	0.918325	1.02255	1.03026	0.960279	1.12759	0.965158	0.943324	1.07042	0.870083	0.934707	0.989678	1.14079	1.01757	0.844162
1777	53.0012	851.513			1.98623	0.822738	0.896388	0.461308	6.81309	0.475178	0.425998	0.835411	0.347831	0.766131	0.872487	0.827095	0.332702	0.335302	2.51622	0.816839	0.379169	0.849085	0.362966	0.834044	0.802501	1.0793	0.352985	0.360534	0.874569	2.77355	1.59148	1.43467	0.3722	0.370481	0.858825	0.819765	1.84593	0.801252	0.371937	2.46811	0.434454	2.42531	0.347474	0.759149	0.335275	0.34072	0.87167	0.789931	0.837909
1783	53.1103	850.508			2.59902	0.681863	1.56483	0.611731	7.62739	0.616336	0.62038	0.745654	0.494298	1.02206	0.700389	0.833893	0.49531	0.439972	1.45969	0.670508	0.474203	0.678705	0.442298	0.699939	0.656639	0.466607	0.441274	0.466313	0.734855	1.10063	1.1669	1.64038	0.448246	0.485883	0.724937	0.698299	1.4562	1.13095	0.465746	1.78973	0.823162	1.73705	0.477173	0.700062	0.455185	0.479911	0.705901	0.731139	0.680933
1801	53.5427	777.478			0.0752201	0.175665	0.0701403	4.18698	0.142878	0.0667765	0.0726424	0.144301	0.0607443	0.0660967	6.32204	0.160055	0.0625669	0.473209	0.0955184	0.155047	3.49373	0.154881	0.0626785	2.0168	0.157083	2.64433	2.02756	0.499284	0.212859	0.0776326	1.10264	0.700178	3.33331	0.123806	1.53579	2.36021	0.144126	1.7607	0.517268	0.750187	0.420778	2.72326	1.29867	0.625574	1.63463	5.83508	0.221004	0.155565	0.151247
1806	53.5784	805.474			0.118952	0.0736321	8.01393	0.124357	0.770229	0.124018	5.43403	0.0749237	0.0518159	0.0543272	1.55685	0.0822745	1.06252	0.680501	0.735952	0.0808221	4.29345	8.80356	1.05966	0.0773367	0.0760097	0.372003	0.0503424	1.94023	0.069152	0.120907	0.0728409	0.0736952	0.0567068	1.02214	0.0829653	0.0751483	0.380982	2.23984	1.14342	0.0519666	0.953048	0.0705474	0.0578026	0.0744759	0.0516725	0.0513043	0.0828786	0.0856285	0.0719788
1810	53.6696	967.528			2.1313	0.317069	2.03168	0.422135	2.38466	0.479772	0.464346	0.371839	0.287837	5.36311	0.383434	1.15982	3.04424	0.268093	0.234625	0.349783	0.240815	0.357897	1.0669	0.407799	0.364302	0.23357	0.278651	0.292339	0.373143	1.0771	3.29292	0.891742	0.265909	0.29201	0.328469	0.958608	3.21162	0.309081	0.32306	1.43263	1.98409	3.52035	0.285354	0.283294	0.256075	0.280145	0.388165	0.369023	0.351658
1817	53.7947	853.492			0.273782	0.645619	1.96543	0.296357	6.82707	0.286294	0.98282	0.652786	0.320724	0.686934	0.596914	0.626971	0.352865	0.295287	2.16715	0.62306	0.180818	0.595714	0.756611	0.572823	0.593845	0.173267	0.348168	0.293488	0.613437	4.59479	1.75624	0.607053	0.323551	0.323359	0.617802	0.616824	6.00621	0.62023	0.174802	5.34415	0.270472	0.613074	0.158838	0.645585	0.264189	0.170921	0.587115	0.635903	0.83796
[truncated: 53 more columns]

## Sheet: Supplemental table 3
Supplemental table 3. QTLepi for secondary metabolites in leaves and flowers of the epiRIL population. The 1.5 LOD support interval is presented. The explained variance is calculated according to the following formula: EV (%) = (1-10^(-2*LOD/n))*100 where LOD is LOD score for the particular trait and n is number of epiRILs (R/QTL FAQ). Abbreviations used: L, leaf; F, flower; QTL, quantitative tra…
Metabolite nr	Tissue	QTL	LOD	Peak marker	chr	cM	Support interval (cM)	Explained variance (%)	Effect	Putative Metabolite ID	MSI level
1200	L	1	3.6	MM1	1	0	0-12	16.3	0.1	quercetin-3-O-hexoside	2
1584	L	2	3.6	MM5	1	13.5	6-26	16.7	-0.28
1544	F	3	3.2	MM10	1	18.2	14-29	14.9	0.06	7-methylthioheptyl glucosinolate	2
1443	F	4	3.9	MM25	1	29	20-36	17.6	-0.13
1438	F		3.8	MM25	1	29	20-36	17.2	-0.13
1537	F	5	2.5	MM91	1	37	29-55	11.7	0.14
1429	F	6	3.5	MM123	1	41.1	38-46	16.2	-0.1	kaempferide 3-hexoside	2
1421	F		3.1	MM123	1	41.1	38-46	14.5	-0.11	kaempferol-deoxyhexoside	2
1584	L	7	2.5	MM168	2	4.2	0-10	11.8	-0.29
2205	L		2.7	MM240	2	6.5	0-10	12.6	-0.16
1221	F	8	2.7	MM330	2	7	2-14	12.8	0.11	9-Methylsulfinylnonyl glucosinolate	2
403	F		3.3	MM373	2	11	2-14	15	-0.06	D-Gluconic acid + GSSG (overlap)	4
1619	F	9	2.7	MM382	2	21.5	15-33	12.7	-0.04
1468	F	10	3	MM398	3	26.6	22-36	14	-0.09	feruloyl malate conferyl alchohol	4
707	F	11	4.4	MM399	3	34.8	29-38	19.6	-0.1	dihydroxybenzoic acid xyloside III	3
1584	L	12	2.9	MM427	3	46.1	36-51	13.3	-0.31
939	F		2.7	MM432	3	46.7	36-51	12.5	0.12	4 or 5-Hydroxy-3-indolylmethylglucosinolate	3
1206	F	13	3.1	MM587	4	4.5	0-14	14.5	0.05	1-Methoxy-3-indolylmethyl glucosinolate	2
709	F	14	3.4	MM654	4	11.1	5-18	15.5	0.09
715	F		4.1	MM654	4	11.1	5-18	18.5	0.11	4 or 5-Hydroxy-3-indolylmethylglucosinolate	3
486	F		3.2	MM654	4	11.1	5-18	14.9	0.07
622	F		2.8	MM654	4	11.1	5-18	13.3	0.09	4-methylsulfinylbutyl glucosinolate	2
1534	F	15	2.8	MM665	4	16.6	12-21	13	0.01
532	F		4.1	MM666	4	17.1	12-21	18.6	0.06
2272	L	16	3.6	MM686	4	33	24-45	16.3	-0.35
1971	L		4	MM686	4	33	24-45	18.2	-0.39
2077	L		4	MM686	4	33	24-45	18.2	-0.39
2321	L		2.7	MM686	4	33	24-45	12.8	-0.41
1379	F	17	2.9	MM701	4	68.3	61-81	13.5	0.13	Kaempferol 3-O-glucoside	1
1206	F	18	4.8	MM823	5	41.2	40-43	21.4	0.06	1-Methoxy-3-indolylmethyl glucosinolate	2
1390	F	19	3.3	MM854	5	47.4	35-60	15.2	0.1	Hexyl glucosinolate	2
1537	F	20	3.4	MM859	5	56.4	51-65	15.7	0.15
759	F		3.1	MM862	5	57.6	51-65	14.3	0.15	4-methylthiobutyl glucosinolate	2
1680	F		3.6	MM862	5	57.6	51-65	16.3	0.1	8‐Methylthiooctylglucosinolate	2
758	F		2.9	MM862	5	57.6	51-65	13.6	0.07	unknown GLS_ C12H23NO10S3	3
767	L	21	2.5	MM865	5	63.6	31-66	11.8	-0.11	dihydroxybenzoic acid xyloside IV	3

## Sheet: Supplemental table 4
Supplemental table 4. Spearman correlations between leaf (L) and flower (F) metabolites and morphological traits. Only metabolites for which a significant QTL was detected were taken into account. P(χ2) gives the chi-square P-value for the chance that the number of observed significant correlations does not deviate from the expected number of significant correlations among all metabolites. Metabo…
Metabolite nr	Putative Metabolite ID	MSI level	Tissue	FT	LA20	RGR	MSB	PH1S	TPH	AIL
767	dihydroxybenzoic acid xyloside II	3	L	-0.0997655	0.028022	-0.155482	-0.00866827	-0.164342	-0.213171	-0.0418332
1200	quercetin-3-O-hexoside	2	L	0.20936	0.103683	-0.208447	0.166118	-0.0353965	-0.18659	-0.174079
1584			L	-0.0273155	-0.2369	0.0885983	-0.129088	-0.0499021	-0.0980753	0.0888332
1971			L	-0.0362055	-0.082655	0.198551	-0.0613957	-0.0369129	-0.0142228	0.0515353
2077			L	0.00920528	-0.251202	0.299548	0.0166424	0.00084057	-0.0331825	-0.00513108
2205			L	0.0559438	-0.0834645	0.135544	0.0944262	0.119798	-0.00907894	0.0569729
2272			L	-0.0285383	-0.240147	0.305138	-0.00790578	0.000174583	-0.0210854	0.0194199
2321			L	-0.0751905	-0.0678846	0.252796	-0.0587863	0.0842535	0.0922428	0.134263
Test
P (χ2)			L	0.30188	0.0121024	0.271515	*	*	*	*
Metabolite nr	Putative Metabolite ID	MSI level	Tissue	FT	LA20	RGR	MSB	PH1S	TPH	AIL
403	D-Gluconic acid + GSSG	4	F	-0.135115	0.0780312	-0.0100328	0.00495196	0.117922	0.0468651	0.0857857
486			F	0.133132	0.169183	0.0917756	0.235677	0.166523	0.119542	-0.18351
532			F	0.0124641	0.0691586	0.130392	0.0729869	0.0841829	0.0662863	-0.0720002
622	4-methylsulfinylbutyl glucosinolate	2	F	0.0909633	0.161444	0.107112	0.250747	0.119129	0.139953	-0.247152
707	dihydroxybenzoic acid xyloside III	3	F	0.0592328	-0.173566	0.183079	0.050734	-0.0197969	-0.194599	-0.0641478
709			F	0.241871	0.133784	0.047451	0.287845	0.167307	0.0793409	-0.227464
715	4 or 5-Hydroxy-3-indolylmethylglucosinolate	2	F	0.272094	0.1576	0.0232781	0.311185	0.171386	0.0725414	-0.252827
758	unknown GLS_ C12H23NO10S3	3	F	0.143158	0.223605	-0.0195614	0.204858	0.238029	0.180254	-0.0874267
759	4-methylthiobutyl glucosinolate	2	F	0.184195	0.224812	-0.0536729	0.208204	0.234345	0.199941	-0.0841059
939	4 or 5-Hydroxy-3-indolylmethylglucosinolate	2	F	0.0578248	0.175961	-0.0482536	0.172394	0.0316366	0.0448567	-0.212555
1206	1-Methoxy-3-indolylmethyl glucosinolate	2	F	0.404894	0.186612	-0.0491604	0.349767	0.241492	0.0435247	-0.232984
1221	9-Methylsulfinylnonyl glucosinolate	2	F	0.0727444	0.110829	0.172697	0.159776	-0.0528286	0.0282752	-0.265981
1379	Kaempferol 3-O-glucoside	1	F	-0.313359	0.152337	0.210581	-0.177316	-0.171018	0.0148446	0.0759242
1390	Hexyl glucosinolate	2	F	0.102312	0.27961	0.0792381	0.345559	0.141613	0.151826	-0.279685
1421	kaempferol-deoxyhexoside	2	F	-0.426074	-0.0710106	0.267994	-0.350987	-0.276357	-0.0358582	0.19874
1429	kaempferide 3-glucoside	2	F	-0.404515	-0.01099	0.247455	-0.333295	-0.229337	0.0254075	0.222936
1438			F	-0.297971	-0.0680438	0.297422	-0.210368	-0.206258	0.0312817	0.0679165
1443			F	-0.313182	-0.0685039	0.292844	-0.218764	-0.203764	0.0273045	0.082003
1468	feruloyl malate conferyl alchohol	4	F	0.114534	-0.0833971	0.333092	0.0457824	-0.0244478	-0.0469698	-0.101169
1534			F	-0.150985	0.00201774	0.038559	0.00956721	-0.058361	0.01047	-0.0979625
1537			F	0.123607	0.358184	-0.104099	0.288435	0.0240074	0.0667231	-0.357316
1544	7-methylthioheptyl glucosinolate	2	F	-0.0581171	0.219777	-0.0362365	0.0277101	0.185842	0.16964	0.0797287
1619			F	-0.156016	0.188366	-0.110134	0.0118002	-0.0434203	-0.0211726	-0.026079
1680	8‐Methylthiooctylglucosinolate	2	F	-0.0948746	0.189567	0.0647704	0.0563265	0.09936	0.173223	-0.0161711
Test
P (χ2)			F	0.264876	0.0962985	0.113242	1.25117e-07	4.52005e-05	0.325265	7.57454e-06

## Sheet: Supplemental table 5
Supplemental table 5. QTLepi for secondary metabolites in leaves and flowers of the epiRIL population corrected for variation in flowering time. The 1.5 LOD support interval is presented. The explained variance is calculated according to the following formula: EV (%) = (1-10^(-2*LOD/n))*100 where LOD is LOD score for the particular trait and n is number of epiRILs (R/QTL FAQ). Abbreviations used:…
Metabolite nr	Tissue	QTL	LOD	Peak marker	chr	cM	Support interval (cM)	Explained variance (%)	Effect	Putative Metabolite ID	MSI level
1200	L	1	4.72834	MM1	1	0	0-11	21.2808	0.105925	quercetin-3-O-hexoside	2
1544	F	2	2.8668	MM10	1	18.2	16-21	13.5045	0.0628483	7-methylthioheptyl glucosinolate	2
1206	F	3	8.44213	MM11	1	23.2	15-38	34.7683	0.0580142	1-Methoxy-3-indolylmethyl glucosinolate
1443	F	4	3.29284	MM25	1	29	21-36	15.3494	-0.122119
1438	F		3.78165	MM25	1	29	21-40	17.4177	-0.13041
1429	F	5	4.07396	MM123	1	41.1	38-53	18.6303	-0.128335	kaempferide 3-hexoside	2
1421	F		3.92228	MM123	1	41.1	38-53	18.0033	-0.141599	kaempferol-deoxyhexoside	2
1386	F		2.72503	MM123	1	41.1	40-44	12.8817	-0.100408
946	F	6	3.03666	MM128	1	45.9	49-53	14.2448	-0.067099
1584	L	7	4.2814	MM168	2	4.2	0-11	19.4801	-0.297915
2205	L		3.22424	MM240	2	6.5	3-9	15.055	-0.175836
1206	F	8	3.17621	MM374	2	12.7	6-16	14.8483	-0.0332962	1-Methoxy-3-indolylmethyl glucosinolate
403	F	9	5.93215	MM357	2	8.7	0-14	26	0	D-Gluconic acid + GSSG (overlap)	4
1619	F		3.18374	MM357	2	8.7	7-11	14.8808	-0.0558015
1636	F		3.52254	MM357	2	8.7	0-11	16.3278	-0.0512307
1468	F	10	2.67653	MM398	3	26.6	25-35	12.6677	-0.0915284	feruloyl malate conferyl alchohol	4
707	F	11	2.86428	MM399	3	34.8	29-39	13.4935	-0.0892419	dihydroxybenzoic acid xyloside III	3
709	F	12	2.92479	MM654	4	11.1	5-19	13.758	0.0794008
715	F		3.9727	MM654	4	11.1	4-21	18.5	0.100668	4 or 5-Hydroxy-3-indolylmethylglucosinolate	3
622	F	13	2.70372	MM666	4	17.1	5-22	12.7877	0.0848838	4-methylsulfinylbutyl glucosinolate	2
532	F		3.28576	MM666	4	17.1	12-21	15.3191	0.0590458
486	F		2.70599	MM666	4	17.1	14-23	12.7977	0.0645066
1206	F		3.57085	MM666	4	17.1	1-23	16.5321	0.0413705	1-Methoxy-3-indolylmethyl glucosinolate	2
2272	L	14	3.65136	MM686	4	33	24-45	16.8714	-0.327739
1971	L		2.52497	MM686	4	33	28-37	11.9953	-0.221912
2077	L		4.30991	MM686	4	33	23-44	19.5962	-0.361547
2321	L		2.71156	MM686	4	33	29-43	12.8223	-0.422356
1190	F	15	2.7	MM701	4	68.3	62-77	12.8	0.0639679
1379	F		2.69193	MM703	4	72.7	67-81	12.7357	0.145288
1618	L	16	3.76629	MM725	5	36.1	30-51	17.3535	-0.0358994
767	L	17	3.15704	MM734	5	39.5	32-53	14.7657	-0.151164	dihydroxybenzoic acid xyloside IV	3
1370	L		2.51744	MM734	5	39.5	37-50	11.9617	-0.0326498
1545	F		2.84493	MM823	5	41.2	35-43	13.4087	-0.0285098
1565	L		3.47032	MM823	5	41.2	36-51	16.1063	-0.0276012
1574	L		3.63853	MM823	5	41.2	35-53	16.8174	-0.0278159
1451	L	18	2.72262	MM845	5	45.1	40-52	12.8711	-0.0366681
1537	F	19	3.29626	MM859	5	56.4	50-64	15.3641	0.149114
759	F		2.90136	MM862	5	57.6	54-62	13.6557	0.139461	4-methylthiobutyl glucosinolate	2
1680	F		2.5113	MM862	5	57.6	54-59	11.9343	0.0845499	8‐Methylthiooctylglucosinolate	2
1419	F		3.65984	MM867	5	65.9	50-66	16.9071	-0.164609

## Sheet: Supplemental table 6
Supplemental table 6. Candidate gene list for epigenetic regulation of secondary metabolism in Arabidopsis flowers. Significance of correspondence between methylation and metabolite levels is tested with a TTEST between hypo-methylated (methylation level between -1 and -0.3) and methylated (methylation level between -0.3 and 1) epiRILs (TTEST1). Significance of overlap between DMR and methylation…
QTL	Locus ID	Abbreviation	Involved in :	DMR	Methylation variation	TTEST1	TTEST2
6	AT1G43620	UGT80B1	flavonoid biosynthesis	MM123	gene body	**	****
	AT1G50740	Transmembrane protein	flavonoid biosynthesis	MM123	promoter and gene body	**	****
8	AT2G04160	AIR3	glucosinolate biosynthesis	MM330	promoter and gene body	**	****
	AT2G05520	GRP3	glucosinolate biosynthesis	MM330	promoter	**	****
13	AT4G03070	AOP	glucosinolate biosynthesis	MM587	promoter	*	*
14	AT4G09650	PDE332	glucosinolate metabolism	MM654	promoter	**	****
16	AT4G27430	CIP7	flavonoid metabolism	MM701	gene body	*	****
18	AT5G42270	VAR1	glucosinolate biosynthesis	MM854	promoter and downstream	*	**
19	AT5G57330	Galactose mutarotase-like	glucosinolate biosynthesis	MM862	promoter and gene body	*	**

## Sheet: Supplemental table 7
Supplemental table 7. Statistical overview of metabolic values for wild-type Col-0 and knock-out mutants used in the study. Given are the average values, the standard error of the mean for 249 metabolites of wild-type and mutant lines. Additionaly, statistical T-tests are presented for differences between wild-type and mutants. Fold changes between wild-type and mutants are also presented. Column…
						mass spectrum		AVERAGE				SEM				TTEST			FOLD
Metabolite nr (cluster ID)	Retention time (min)	mz highest signal in cluster	manually checked mz [M-H]-	Putative Metabolite ID	MSI level	mass list (microdalton)	(relative)intensity list	Col-0	M1 (AT2G03070)	S1 (AT1G50740)	S2 (AT3G24360)	Col-0	M1	S1	S2	Col-0 vs M1	Col-0 vs S1	Col-0 vs S2	Col-0 vs M1	Col-0 vs S1	Col-0 vs S2
1	1.50391	272.959				2.72959045E8;1.58978424E8;2.74956604E8;2.73959839E8;3.86939484E8;5.16897644E8;1.60976166E8;1.59979431E8;3.88937103E8;3.87940125E8;5.18894958E8;5.00920105E8;5.1789856E8;1.14988899E8;5.02917297E8;2.75957367E8;5.01920898E8;6.30877991E8;6.02883118E8;2.7496283E8;7.60835938E8;2.76954132E8;6.03884216E8;6.32874939E8;5.19896057E8;6.04879883E8;	999.0;831.97;277.82;238.45;207.24;159.1;121.38;121.36;83.18;64.47;59.17;56.39;51.52;39.36;26.85;26.35;25.66;22.29;20.94;20.42;15.86;12.3;11.8;11.04;10.0;7.46;	6.21889	6.24821	6.2597	6.1902	0.0254066	0.0208226	0.0174895	0.0164157	0.398174	0.222363	0.402642	1.06984	1.09853	0.936062
2	1.50391	288.936				2.88936493E8;1.74956024E8;4.18894562E8;5.32875183E8;3.04914124E8;2.90934143E8;5.48852783E8;2.89937286E8;4.34872192E8;5.34872498E8;5.33876221E8;6.6283313E8;4.20892242E8;7.76813538E8;4.19894928E8;1.46961334E8;6.78810547E8;7.92790955E8;2.90940643E8;7.77814636E8;4.16878967E8;6.34838196E8;1.75959549E8;6.63834167E8;2.92929443E8;6.19861694E8;5.64830383E8;3.02898499E8;5.30859558E8;	999.0;841.12;343.39;264.83;257.32;122.42;114.78;99.92;65.9;65.77;61.25;54.34;41.61;40.82;32.33;25.35;24.81;24.21;19.36;17.5;15.57;15.05;14.38;12.91;12.83;12.74;12.24;11.53;11.08;	6.13536	6.15821	6.06252	6.12567	0.0408557	0.0111069	0.0401088	0.00817563	0.604076	0.239028	0.84219	1.05403	0.845594	0.977944
3	1.60749	242.94				2.42940048E8;3.26901428E8;4.10862762E8;4.40881744E8;4.94824219E8;4.12860779E8;3.28899292E8;2.44937714E8;5.78785706E8;3.56920441E8;6.62747314E8;2.43940918E8;5.70839905E8;4.428797E8;7.46708862E8;4.96822296E8;5.80783447E8;6.08804871E8;3.27901825E8;4.41882721E8;	999.0;689.28;674.01;248.86;228.99;201.32;177.73;174.63;171.46;156.3;131.15;99.44;81.81;81.64;80.47;79.83;71.31;64.52;52.49;32.92;	5.5763	5.58627	5.57574	5.50012	0.0338753	0.0219218	0.0263055	0.0082408	0.810988	0.990024	0.0923116	1.02323	0.998727	0.839116
5	1.7107	112.986				1.12985794E8;2.80908508E8;3.64869934E8;4.48831482E8;5.32792908E8;6.16754211E8;1.96947098E8;7.00715637E8;7.84677185E8;8.6863855E8;5.34791016E8;6.18752319E8;9.52600281E8;7.86675232E8;7.0271344E8;4.50829559E8;3.6686795E8;8.70636536E8;9.54597656E8;1.036561646E9;	999.0;613.11;487.94;450.49;433.23;353.86;296.25;266.35;217.94;178.73;140.9;123.66;116.73;105.99;96.95;95.41;88.71;86.55;69.15;56.73;	5.43287	5.53611	5.5351	5.44964	0.0419612	0.0420273	0.0580146	0.0323365	0.120357	0.191212	0.771022	1.26834	1.26539	1.03936
6	1.7107	296.882				2.96882416E8;3.80843811E8;2.12921066E8;4.64805298E8;5.48766846E8;6.32728149E8;3.82841919E8;1.30957748E8;2.98880493E8;7.16689514E8;4.66803497E8;5.50764832E8;8.00650696E8;6.34726135E8;8.02648743E8;8.84612366E8;2.14919144E8;9.68573853E8;8.86610413E8;1.29963028E8;1.054533569E9;3.8184726E8;4.65808807E8;7.59669617E8;2.97885773E8;8.85613403E8;4.68801636E8;1.138495483E9;8.43630981E8;7.17690796E8;7.586706…	999.0;716.92;619.62;454.2;365.97;211.32;196.65;195.11;187.67;166.84;156.01;148.92;139.71;95.59;92.61;83.0;82.82;56.77;55.26;47.52;31.37;30.42;24.08;23.49;23.28;18.25;17.71;16.97;16.34;16.05;15.5;14.67;14.3;6.66;	6.49469	6.48981	6.49852	6.486	0.00824394	0.00510166	0.00484363	0.00634328	0.628218	0.699147	0.450884	0.988824	1.00886	0.980194
8	1.84732	302.136				3.02135895E8;3.40091705E8;3.0313913E8;2.84125336E8;6.05279114E8;4.86161133E8;3.92131256E8;6.43234924E8;4.30087097E8;5.24117065E8;6.06283081E8;	999.0;133.38;123.43;111.26;77.59;69.73;50.32;34.88;23.08;21.6;15.15;	5.75584	5.67656	5.78189	5.74128	0.0220681	0.0284799	0.0300578	0.0261929	0.0589593	0.504609	0.681314	0.833148	1.06182	0.967035
9	1.86563	104.035				1.04035484E8;1.69061935E8;2.50104584E8;2.88060455E8;	999.0;275.56;196.05;159.15;	4.757	5.04293	4.68012	4.81046	0.0404584	0.0217534	0.0399514	0.0120433	0.000252556	0.213356	0.293515	1.93168	0.837773	1.131
10	1.8832	131.046				1.31046417E8;2.77115509E8;3.1507135E8;1.13035835E8;2.78118927E8;2.63099854E8;1.14019844E8;	999.0;385.0;76.2;51.2;28.98;27.85;11.58;	5.77353	5.72568	5.78462	5.69327	0.0305365	0.0220324	0.0201628	0.0283046	0.239558	0.769529	0.10174	0.895682	1.02587	0.831272
11	1.89986	291.131				2.91131165E8;1.4606517E8;1.27051529E8;2.92134125E8;	999.0;252.21;106.43;101.95;	5.84586	5.81384	5.86977	5.83649	0.0176478	0.0227185	0.0152873	0.00940229	0.298121	0.335804	0.678286	0.928941	1.05659	0.978665
12	1.93372	147.049				1.47049271E8;2.93099243E8;1.18051186E8;3.31055023E8;2.14048798E8;2.36041351E8;2.86081207E8;1.40012054E8;4.76165649E8;2.87065186E8;3.21141724E8;4.62149933E8;4.03149048E8;	999.0;460.84;254.21;174.33;163.21;149.35;124.95;102.92;100.66;98.32;63.41;55.78;39.52;	5.41485	5.52647	5.38313	5.40185	0.0162636	0.0158861	0.00784613	0.0136084	0.00117954	0.117082	0.572576	1.29305	0.929573	0.970497
13	1.99995	325.125				3.25125488E8;3.26128754E8;1.60061676E8;	999.0;103.54;18.6;	5.54277	5.34658	5.55733	5.57278	0.0272765	0.0220836	0.0134763	0.0147031	0.000516053	0.645191	0.40033	0.63651	1.03408	1.07154
14	2.0324	474.147				4.74147034E8;4.88162628E8;4.89165955E8;4.7515036E8;8.30279846E8;8.31283386E8;8.17267456E8;4.90167175E8;4.76151459E8;	999.0;983.75;167.4;158.92;111.34;34.41;21.32;15.74;14.24;	5.93738	6.01758	5.9599	5.87556	0.0105003	0.00737345	0.014788	0.0245386	0.000245375	0.249545	0.0403586	1.20284	1.05322	0.867324
15	2.04802	225.062	179.056	glucose or fructose	1	2.25061798E8;1.79055008E8;2.2606514E8;1.61045746E8;2.1503302E8;1.80059631E8;2.69051636E8;1.43035187E8;1.0102462E8;1.1903521E8;1.1302462E8;2.42051956E8;5.65162781E8;2.17030106E8;2.27066025E8;3.59119904E8;2.64072723E8;1.81060501E8;1.7704071E8;2.55072433E8;2.69087982E8;2.70055054E8;5.66166138E8;9.07279419E8;2.16036407E8;4.03109467E8;	999.0;575.94;75.93;64.17;60.77;52.88;50.23;45.08;31.82;31.61;31.33;25.63;18.44;16.29;13.98;13.88;10.38;8.64;7.59;6.55;3.87;3.4;2.55;2.02;1.99;1.89;	6.68896	6.57717	6.62641	6.75083	0.0432034	0.0228564	0.028934	0.0272556	0.0514903	0.263379	0.293813	0.773053	0.865863	1.15312
16	2.09488	387.115				3.87114838E8;7.29231567E8;6.83226013E8;3.88118073E8;7.30234619E8;1.025342651E9;6.84229248E8;1.026346313E9;7.31236572E8;3.89118683E8;7.73221313E8;6.85231018E8;1.0713479E9;7.27216003E8;1.027348633E9;7.28375061E8;7.74224731E8;7.30089417E8;7.32239441E8;6.8244928E8;1.072351807E9;6.84003845E8;	999.0;411.3;223.62;159.61;115.41;64.55;53.95;23.88;23.51;22.55;16.55;12.4;9.3;8.58;7.4;5.77;4.43;4.06;3.97;2.82;2.2;1.41;	6.72061	6.7523	6.70939	6.7213	0.00749856	0.00585144	0.00855522	0.0140817	0.0103426	0.353227	0.964607	1.07572	0.974514	1.00159
18	2.11058	537.168				5.37167786E8;5.38171265E8;8.79284607E8;5.39172485E8;8.80288025E8;5.36626465E8;1.221401123E9;3.73099121E8;	999.0;191.0;75.7;32.99;23.62;15.37;9.45;4.92;	5.88624	5.88014	5.90198	5.87226	0.0138741	0.00845268	0.0140389	0.0116455	0.717196	0.44832	0.480461	0.986059	1.0369	0.968318
19	2.12642	651.2				6.51199646E8;9.47311096E8;9.9331665E8;6.05194092E8;6.52203125E8;8.01252563E8;6.95189514E8;9.94320007E8;1.077337769E9;	999.0;436.23;379.71;311.68;215.16;150.88;139.2;122.2;84.41;	5.30731	5.12599	5.33625	5.24411	0.0260046	0.0639618	0.0645544	0.0612493	0.0303672	0.688398	0.337198	0.658699	1.06892	0.864572
20	2.15839	193.036				1.93035599E8;5.35152222E8;8.77268921E8;	999.0;728.9;190.19;	4.79018	4.50193	4.76939	4.8061	0.0263241	0.0143349	0.027847	0.0192212	1.13578e-05	0.602288	0.656529	0.514939	0.953264	1.03734
21	2.19138	135.03				1.35030045E8;2.62057007E8;3.2705719E8;6.04173645E8;3.31088531E8;1.66043945E8;3.01077942E8;3.45067657E8;6.05176941E8;7.08107849E8;9.46289795E8;4.47135651E8;2.63060364E8;	999.0;206.64;148.77;97.12;79.37;68.08;62.86;41.18;15.32;14.14;11.31;7.81;7.61;	5.78118	5.88895	5.74292	5.81247	0.00959099	0.0121031	0.013797	0.0120891	0.000115018	0.0523159	0.0785099	1.28166	0.915671	1.07471
22	2.25727	230.991				2.30991348E8;9.6969734E7;1.94946686E8;2.92923645E8;1.42975235E8;3.56999664E8;3.86973724E8;4.54976624E8;3.90900574E8;2.77033142E8;1.76936096E8;3.28968262E8;2.31994644E8;3.68963165E8;4.3103656E8;3.07007477E8;3.35038788E8;5.52953857E8;3.65012909E8;2.32995529E8;4.88877991E8;2.02996445E8;5.93089722E8;3.5800296E8;4.23018524E8;9.05077026E8;5.86854736E8;2.94927887E8;4.33015991E8;1.003054504E9;1.86965118E…	999.0;383.85;383.59;247.78;182.97;147.17;79.88;70.39;55.55;55.38;43.29;38.83;35.91;31.03;24.32;21.42;20.75;20.01;15.9;13.77;11.77;10.7;7.72;6.91;6.57;5.91;4.17;3.77;3.44;3.4;2.99;	6.43353	6.48066	6.42716	6.37551	0.027427	0.0201565	0.0188978	0.0642007	0.203575	0.853143	0.397554	1.11462	0.985444	0.87495
23	2.25727	175.025	273.002	1-Phospho-alpha-D-galacturonate	2	1.75024765E8;2.73001892E8;3.09046509E8;3.70978882E8;4.35054932E8;1.7602829E8;3.51056946E8;4.65029236E8;3.06076782E8;3.10049835E8;4.49034149E8;2.74005249E8;4.13093872E8;5.09091949E8;5.33032043E8;4.36058105E8;4.68955902E8;6.15118408E8;4.07023407E8;	999.0;566.07;367.98;160.44;136.26;53.38;51.04;44.2;40.67;34.02;29.43;29.18;25.49;23.2;22.34;16.07;15.12;11.46;8.91;	5.92343	5.79824	4.75388	5.42526	0.129294	0.113109	0.313318	0.379596	0.486928	0.00868782	0.213668	0.749563	0.0676782	0.317566
24	2.25727	288.997				2.88996796E8;2.09066833E8;4.81024109E8;4.01093933E8;4.44033173E8;5.38083496E8;5.42010376E8;4.82027557E8;3.27045441E8;	999.0;372.26;338.41;191.61;72.54;65.89;33.39;31.17;27.95;	5.78464	5.7307	5.84852	5.82823	0.0341522	0.0198639	0.0248002	0.0489463	0.209329	0.168568	0.475753	0.883204	1.15848	1.10559
27	2.35485	237.025				2.37025146E8;3.65036285E8;3.83046936E8;2.19014801E8;2.26996552E8;3.47025848E8;3.26044769E8;2.54015488E8;2.38028656E8;3.66039734E8;1.74012634E8;3.39056915E8;3.48028961E8;	999.0;463.85;349.9;332.23;233.9;180.71;138.1;65.85;54.57;49.88;37.67;26.75;14.29;	5.93857	5.89685	5.96827	5.97368	0.0113892	0.00762787	0.0176477	0.0340924	0.0159864	0.195049	0.317229	0.908418	1.07078	1.08422
28	2.38936	133.014	133.014	malic acid	1	1.33014374E8;1.15003738E8;1.34017685E8;	999.0;37.26;37.0;	6.70627	6.72345	6.70932	6.69849	0.00774373	0.0116187	0.00774746	0.0192139	0.253641	0.78778	0.694804	1.04034	1.00705	0.982247
29	2.47778	309.046				3.09046448E8;3.41036072E8;3.10049683E8;	999.0;148.62;138.72;	4.45873	4.47097	3.75806	4.112	0.258316	0.119596	0.173127	0.370461	0.966758	0.0542953	0.454361	1.02858	0.199218	0.450058
30	2.54814	289.018				3.19947449E8;2.89017792E8;2.73044098E8;	999.0;996.29;750.82;	4.87112	4.87893	4.8935	4.92135	0.0249839	0.028567	0.0119278	0.00551407	0.842171	0.442285	0.12404	1.01814	1.05288	1.1226
31	2.68472	194.946				1.94946243E8;2.92923645E8;9.6969742E7;3.90900696E8;1.42975143E8;4.88877777E8;1.76935486E8;5.86854919E8;6.8483197E8;2.94927856E8;7.82809021E8;1.96950897E8;3.92904907E8;8.8078656E8;4.90882172E8;9.78764221E8;5.88859192E8;4.88407654E8;6.86836487E8;	999.0;913.61;692.06;404.46;330.28;198.78;174.61;124.21;59.65;19.08;18.72;13.61;10.05;8.37;5.75;5.14;3.78;2.19;1.83;	6.8818	6.87854	6.85269	6.8971	0.00711586	0.0198607	0.0194951	0.0242976	0.881116	0.198399	0.523793	0.992528	0.935183	1.03587
32	2.70074	230.991				2.30991348E8;2.88996918E8;3.86973907E8;4.8495105E8;	999.0;86.3;46.3;19.02;	5.99841	6.02279	5.99085	6.00118	0.0108343	0.0147901	0.0103624	0.0201545	0.220287	0.627403	0.901219	1.05774	0.98273	1.00641
33	2.76554	333.059				3.33059387E8;5.93089478E8;3.34062683E8;5.94092957E8;8.53119751E8;6.67126587E8;3.35063446E8;6.91066589E8;9.51097046E8;7.65103577E8;9.27157043E8;6.03050598E8;	999.0;283.0;97.21;39.08;32.28;29.17;16.49;13.46;11.61;10.43;5.3;4.25;	6.01185	6.08755	5.99578	6.02921	0.0171691	0.0252774	0.0132587	0.0130215	0.0382619	0.480214	0.467052	1.19043	0.963693	1.04079
34	2.78185	241.012				2.4101207E8;5.01042175E8;3.75033722E8;	999.0;265.45;90.12;	4.82168	4.79647	5.02253	4.88389	0.0363123	0.0218415	0.0360666	0.0279972	0.568392	0.00439092	0.235706	0.943613	1.58801	1.154
36	2.79824	451.05				4.51049774E8;4.21039185E8;4.52053253E8;4.81060486E8;4.45015686E8;5.49026917E8;3.19007324E8;4.53054199E8;	999.0;143.98;115.41;64.67;38.73;31.59;28.34;16.54;	5.41755	5.44952	5.46731	5.3144	0.0361683	0.0438229	0.0285281	0.0271251	0.589102	0.311574	0.0661292	1.07639	1.12139	0.788576
37	2.81489	505.073				5.05073334E8;5.79110229E8;5.06076813E8;	999.0;136.08;104.28;	4.97189	5.08598	4.9383	4.91644	0.0184499	0.0320772	0.0177276	0.00956135	0.0150464	0.225675	0.0434844	1.30043	0.925575	0.880139
38	2.86598	245.043				1.10984932E8;2.45043289E8;1.56990829E8;4.91094025E8;2.22977936E8;3.57035919E8;2.46046631E8;1.46962051E8;2.96978302E8;2.47047516E8;4.92097382E8;	999.0;945.35;156.94;117.03;94.32;84.99;55.75;25.8;19.08;10.93;9.21;	6.19231	6.25649	6.14718	6.19062	0.0118202	0.0146713	0.0120338	0.0100959	0.00926962	0.0281194	0.91927	1.15926	0.901299	0.99612
39	2.88493	437.07				4.37070435E8;4.38073822E8;	999.0;116.88;	5.09782	5.16258	5.10248	5.05269	0.0408231	0.0352418	0.0320068	0.0330078	0.264188	0.930655	0.435901	1.1608	1.01078	0.901302
40	2.92131	197.808				1.97808014E8;1.62839218E8;1.60842178E8;1.99805084E8;1.95810944E8;2.1503273E8;	999.0;614.38;613.39;452.56;322.55;130.01;	5.12111	5.07538	5.1154	5.15263	0.019237	0.0133311	0.0231845	0.0208924	0.0864878	0.854306	0.305359	0.900063	0.98693	1.07528
41	2.92131	184.986				1.84985855E8;3.70978699E8;	999.0;80.35;	5.34912	5.39885	5.35598	5.34419	0.0208708	0.0230422	0.0184914	0.0274122	0.1483	0.811761	0.888022	1.12134	1.01593	0.988713
42	3.15744	191.02	191.02	(iso)citric acid	1	1.91019806E8;1.92023056E8;1.11008911E8;1.93023865E8;1.73009323E8;6.27985901E8;1.29019516E8;6.13029846E8;1.12012306E8;	999.0;66.52;38.54;14.02;7.15;5.92;5.08;1.31;1.18;	6.74776	6.7427	6.76589	6.72541	0.0168913	0.0156802	0.0248356	0.0280094	0.831678	0.562951	0.496629	0.988413	1.04261	0.949834
43	3.1923	191.024				1.91023926E8;1.31421036E8;	999.0;43.25;	3.5	3.5	3.5	3.5	0	0	0	0	NA	NA	NA	1	1	1
44	3.22904	515.056				5.15055969E8;5.16059387E8;	999.0;141.17;	5.18809	5.02353	5.30135	5.21893	0.0519267	0.0438746	0.0544248	0.0337577	0.0418058	0.170587	0.654156	0.684606	1.29794	1.07359
45	3.26441	128.035				1.28035446E8;1.29038849E8;2.57078064E8;	999.0;41.44;37.78;	5.34973	5.25594	5.40853	5.322	0.080652	0.0852712	0.0834424	0.092779	0.447335	0.626039	0.827355	0.805778	1.14499	0.93814
46	3.3032	323.029				3.23028595E8;3.24032013E8;4.13024017E8;	999.0;91.45;45.05;	5.23248	5.01727	5.31117	5.34842	0.0442449	0.0627865	0.0512633	0.040803	0.0231325	0.278684	0.102079	0.609245	1.19866	1.30601
47	3.58457	214.996				2.14996353E8;2.3504599E8;2.88965271E8;	999.0;757.98;626.52;	4.28167	4.52665	4.27083	4.31798	0.0813666	0.0215072	0.0910955	0.0561264	0.0195651	0.93144	0.73868	1.75783	0.975341	1.08721
48	3.60181	422.026	422.025	Glucoiberin	2	4.22025696E8;8.90116821E8;8.45058655E8;4.25024597E8;8.91119873E8;	999.0;36.71;35.97;17.12;10.92;	6.38877	6.31012	6.3131	6.33118	0.0108706	0.0162815	0.0295319	0.0222277	0.00385441	0.0428665	0.0413339	0.834352	0.840096	0.87581
50	3.62005	96.9603				9.6960274E7;2.14986542E8;2.42981506E8;2.88987213E8;	999.0;48.48;37.83;22.89;	4.03321	3.74192	4.13297	3.92664	0.100406	0.148487	0.113358	0.190009	0.142806	0.528524	0.61415	0.511343	1.25824	0.78241
51	3.73812	115.004	115.004	fumaric acid	1	1.15003853E8;2.31014755E8;1.16007149E8;2.32018036E8;1.49009216E8;2.33030304E8;1.30998718E8;1.62012589E8;2.12980698E8;2.33019028E8;3.2101001E8;2.47009613E8;1.77004196E8;1.50980423E8;3.87005524E8;1.72025253E8;1.65004211E8;	999.0;291.32;43.22;23.95;14.18;13.63;7.79;5.23;4.24;3.83;3.23;2.93;2.62;2.59;2.05;1.98;1.8;	6.431	6.58569	6.39246	6.50538	0.0524361	0.0190663	0.0340371	0.0220169	0.0242018	0.554776	0.272931	1.42788	0.915098	1.18682
52	3.78915	192.999				1.92999084E8;1.58993607E8;2.04999039E8;	999.0;883.24;284.13;	4.98264	5.07305	4.90565	5.03323	0.0305827	0.01212	0.079879	0.0204287	0.0251293	0.394306	0.236206	1.23142	0.837535	1.12353
53	3.83912	212.971				2.12971176E8;2.90966492E8;1.96923386E8;2.46976593E8;2.58976624E8;2.92894989E8;9.8964439E7;2.13974518E8;2.14966965E8;2.62971558E8;3.30997742E8;1.96931732E8;2.2896611E8;	999.0;175.56;154.31;106.9;97.14;66.01;44.18;37.81;35.0;25.9;21.66;20.31;17.23;	5.71715	5.45567	5.74093	5.6687	0.0206081	0.0383085	0.0232508	0.0466981	0.000319432	0.46601	0.338835	0.547671	1.05628	0.89443
54	3.89095	96.9602				9.6960167E7;1.94927673E8;9.8956024E7;	999.0;294.35;52.97;	6.37795	6.14944	6.42445	6.35173	0.0250873	0.0295428	0.0186943	0.0261911	0.000363478	0.175481	0.496755	0.590873	1.11302	0.941412
55	3.9249	630.048	630.048	artifact due to complex formations in MS	4	6.30047913E8;6.31051575E8;	999.0;152.98;	4.77711	4.94713	4.75038	4.56152	0.0548675	0.0689429	0.0752095	0.0646139	0.0897732	0.781307	0.0375394	1.47918	0.940306	0.608702
56	3.98834	535.013				5.35012878E8;1.86955643E8;1.42965729E8;3.08995911E8;	999.0;271.81;232.78;199.2;	4.72892	4.43967	4.75428	4.72799	0.0280126	0.0710382	0.0301403	0.0169478	0.00532786	0.554801	0.979427	0.513748	1.06013	0.997844
57	4.0043	873.09				8.73090393E8;8.74093506E8;8.75085144E8;1.78018112E8;8.76088745E8;8.71968689E8;8.77079163E8;	999.0;264.99;210.37;170.68;53.98;12.76;12.26;	5.88092	5.8682	5.80058	5.79899	0.0213896	0.0214265	0.0410923	0.0410653	0.68554	0.121108	0.101425	0.971146	0.831116	0.828079
58	4.11609	436.041	422.025	methylsulfinyl GLS	2	4.36041473E8;4.3704422E8;4.38037445E8;4.39040192E8;3.72043182E8;1.08960678E8;4.06048889E8;4.6803125E8;4.18049164E8;1.09026741E8;	999.0;152.27;130.36;15.71;2.67;1.38;1.25;0.93;0.87;0.6;	7.01959	7.06173	6.96899	6.97227	0.0152302	0.0204256	0.0312708	0.0301164	0.136693	0.183851	0.177873	1.10191	0.890029	0.896782
59	4.63707	565.048				5.65048035E8;5.66051208E8;5.35037415E8;5.67052429E8;5.64463806E8;	999.0;167.17;86.97;34.68;15.97;	6.12514	6.12472	6.14904	6.13095	0.00814556	0.0148871	0.0117784	0.0257348	0.980935	0.133792	0.81887	0.999037	1.05656	1.01346
60	4.69321	606.074				6.06074097E8;5.49053101E8;5.50056641E8;	999.0;622.48;82.53;	5.2227	5.21135	5.23711	5.2533	0.0158579	0.010776	0.00855246	0.0382542	0.570285	0.446769	0.448386	0.974209	1.03375	1.073
61	5.13233	345.083				3.45082581E8;2.99077118E8;3.46085876E8;3.35053802E8;1.37024429E8;3.62072723E8;	999.0;241.49;144.31;106.8;60.78;52.38;	5.24051	5.31279	5.18258	5.27671	0.0487828	0.0300899	0.0409396	0.021042	0.24279	0.389605	0.55442	1.18109	0.875126	1.08693
62	5.15245	129.019				1.29019379E8;1.74012497E8;	999.0;289.0;	4.38779	4.39925	4.46467	4.37531	0.0405887	0.0325632	0.0588214	0.0864221	0.831212	0.313401	0.892151	1.02674	1.19366	0.971672
63	5.58476	450.057	450.057	Glucoalyssin	2	4.50056702E8;4.51060242E8;4.52052551E8;	999.0;131.82;130.54;	5.81363	5.87995	5.74871	5.73161	0.0167448	0.0159602	0.0253455	0.0270495	0.0209324	0.065059	0.0307668	1.16497	0.861147	0.827891
64	5.98949	462.067				4.6206662E8;2.30529602E8;	999.0;61.31;	4.63651	4.46896	4.92984	4.69754	0.0725752	0.0759685	0.0762942	0.0351439	0.149424	0.0237149	0.509857	0.679899	1.96487	1.15087
65	6.5725	329.088				3.29087677E8;3.75093048E8;3.65064301E8;3.76096497E8;3.30090973E8;4.19082977E8;1.67034943E8;3.67061462E8;	999.0;917.22;147.11;142.78;136.16;95.98;48.33;30.56;	5.33376	5.52855	5.30346	5.34993	0.0121971	0.0223235	0.018957	0.0143734	5.97716e-05	0.215765	0.416576	1.56597	0.93261	1.03792
66	7.34465	299.077				2.99077057E8;3.00080444E8;	999.0;104.25;	4.82868	4.74975	4.76024	4.81555	0.0239485	0.0429334	0.026308	0.012774	0.147057	0.0906009	0.668356	0.833822	0.854208	0.970209
67	7.36525	190.928				1.90928329E8;1.46938583E8;2.3193161E8;1.92928802E8;3.36858704E8;1.88933197E8;1.88912842E8;1.80899689E8;	999.0;340.15;113.96;102.72;76.21;72.75;69.63;68.78;	5.16418	5.14728	5.13796	5.14728	0.0514409	0.0741156	0.101536	0.077975	0.856087	0.823597	0.85632	0.961838	0.941413	0.961835
68	8.06176	189.04				1.89040436E8;1.45050629E8;3.79088013E8;2.79035645E8;2.88965118E8;1.90043808E8;	999.0;417.41;401.3;100.49;76.06;61.31;	5.33814	5.41101	5.3296	5.31205	0.0186479	0.0182319	0.00613166	0.0114068	0.023397	0.675128	0.301637	1.18271	0.980534	0.941694
69	8.28596	464.072	464.072	Glucohesperin	2	4.64072327E8;4.65075714E8;4.66068176E8;4.67071594E8;	999.0;141.21;130.32;12.87;	5.77182	5.82341	5.69749	5.7233	0.0249516	0.024532	0.0421964	0.0358537	0.178629	0.167946	0.289459	1.12613	0.842703	0.894306
70	9.38294	345.119				3.45118927E8;3.46122192E8;3.35090027E8;3.42090973E8;	999.0;122.76;80.98;71.06;	5.03382	5.03262	4.977	5.03936	0.013951	0.0187747	0.0173937	0.0221995	0.960298	0.0342565	0.831741	0.997238	0.877356	1.01283
71	9.50323	323.135				3.23134583E8;3.24137848E8;4.13129883E8;	999.0;136.49;17.81;	5.42388	5.44929	5.42465	5.37116	0.0197045	0.0197928	0.0121681	0.00831096	0.389544	0.974222	0.0598136	1.06025	1.00178	0.885684
72	9.64058	207.03				2.07029816E8;1.79034912E8;2.25040222E8;	999.0;929.94;370.46;	4.43828	4.48877	4.39665	4.32476	0.0614994	0.0721079	0.064976	0.037846	0.608721	0.654066	0.18516	1.12327	0.908583	0.769983
73	10.489	285.061	315.072	dihydroxybenzoic acid xyloside I	2	2.85061371E8;2.86064728E8;	999.0;119.61;	5.33783	5.3579	5.31104	5.35784	0.0103077	0.0218904	0.00632707	0.0175784	0.430735	0.0576687	0.335665	1.04731	0.94019	1.04717
74	10.6462	327.108				3.27108337E8;3.73113953E8;3.28111603E8;3.63085022E8;	999.0;348.72;111.74;99.61;	5.28461	5.23832	5.23999	5.27111	0.0205787	0.027586	0.0211035	0.0172472	0.215498	0.168539	0.642508	0.898896	0.902359	0.969412
75	10.826	299.077				2.99077057E8;3.00080414E8;	999.0;128.83;	5.12173	5.11782	5.11391	5.07659	0.0271779	0.0373011	0.0126831	0.0442585	0.934542	0.800744	0.39305	0.991034	0.982143	0.901272
76	11.1771	463.049	463.049	4-Hydroxyindol-3-ylmethyl glucosinolate	2	4.63048615E8;4.64052063E8;4.7702774E8;4.67043457E8;4.79043579E8;9.6960167E7;4.95038513E8;	999.0;161.24;82.32;54.5;43.33;24.02;19.02;	5.52057	5.27061	5.33462	5.28957	0.0261017	0.0424271	0.0632482	0.0175797	0.00102958	0.0263456	0.000227269	0.562397	0.651709	0.587496
77	11.2149	306.076	707.061	unknown	4	3.06076416E8;7.07060791E8;	999.0;915.2;	3.97868	3.68939	3.91454	3.86049	0.201009	0.189394	0.152251	0.210511	0.325494	0.805608	0.699177	0.513701	0.862684	0.761746
78	11.4157	320.077				3.20077393E8;3.34056641E8;3.21080811E8;	999.0;163.4;158.17;	4.78623	4.27968	4.38068	4.55064	0.0598746	0.0896661	0.116572	0.127408	0.00154513	0.0147859	0.114899	0.311493	0.393053	0.581316
79	11.8412	345.119	345.119	1-(3,4-Dihydroxyphenyl)-1,2-ethanediol, 4'-Me ether, 3'-O-?-D-glucopyranoside	4	3.45118927E8;3.46122284E8;	999.0;127.55;	4.55346	4.84804	4.48745	4.59157	0.0204574	0.0207806	0.0302774	0.0421172	7.86967e-06	0.108482	0.411667	1.97049	0.858997	1.09172
80	12.1277	759.235				7.59234924E8;7.60238647E8;5.37197876E8;	999.0;296.25;215.06;	4.37038	4.48554	4.26579	4.35733	0.0912664	0.0512466	0.0703755	0.0750563	0.30326	0.390642	0.918273	1.30363	0.785973	0.970395
81	12.4612	399.093				3.99093445E8;4.00096802E8;3.89064636E8;1.91035004E8;	999.0;176.15;45.23;41.75;	5.14701	5.17411	5.18569	5.11049	0.0277661	0.0203741	0.02036	0.0369254	0.4539	0.29379	0.445779	1.06441	1.09316	0.919363
82	12.4983	478.088				4.78088287E8;4.79091034E8;4.80084167E8;4.81087219E8;4.77633636E8;4.78543732E8;1.002241577E9;9.57183716E8;1.003244812E9;9.7421051E8;4.648862E8;4.91861389E8;9.79166077E8;	999.0;186.7;132.79;18.75;17.6;13.11;9.9;7.0;3.74;3.35;3.07;2.34;1.71;	6.48384	6.46538	6.41371	6.41479	0.0230338	0.0230244	0.035101	0.0169531	0.586497	0.133414	0.055275	0.958397	0.850895	0.853016
83	12.6078	357.119				3.5711911E8;4.03124695E8;3.23134827E8;3.58122192E8;	999.0;234.73;218.78;115.65;	4.65885	4.80965	4.6558	4.67276	0.0262153	0.0253172	0.0274238	0.0295912	0.00326274	0.937854	0.734939	1.41516	0.992997	1.03255
84	12.6821	325.093				3.25092834E8;3.260961E8;3.71098358E8;3.61069458E8;3.88088562E8;3.72101593E8;4.15088196E8;3.27096283E8;3.63066376E8;	999.0;159.52;108.78;50.81;50.7;14.62;14.45;11.68;10.99;	5.73341	5.54852	5.71587	5.69505	0.0206579	0.017783	0.0129276	0.0236507	0.000140208	0.492024	0.260088	0.653289	0.960404	0.915459
85	12.7808	431.119				4.31119476E8;3.85113983E8;4.32122833E8;4.21090698E8;3.86117218E8;4.48109558E8;	999.0;415.09;184.52;101.92;67.8;41.13;	5.349	5.40027	5.29401	5.39872	0.0279443	0.0445985	0.029456	0.0367954	0.358529	0.212587	0.30833	1.1253	0.881057	1.12129
86	13.1952	625.141				6.25140686E8;6.7114624E8;6.26144165E8;6.72149658E8;	999.0;797.85;255.49;174.89;	4.76235	4.74089	4.70832	4.79389	0.0199446	0.0748374	0.0220506	0.0239308	0.788798	0.106697	0.340936	0.951801	0.883015	1.07533
87	13.6776	403.124	403.124	1,2-Benzenediol; O-[?-D-Apiofuranosyl-(1?6)-?-D-glucopyranoside]	4	4.03124359E8;4.04127655E8;	999.0;168.71;	4.14266	4.79267	4.1249	4.2243	0.0300631	0.0820177	0.0488118	0.0448568	7.32605e-05	0.764576	0.16108	4.46696	0.959922	1.20682
88	13.8138	371.098	325.093	hydroxyferulic acid glucoside I	3	3.71098206E8;3.25092651E8;3.72101501E8;3.61069336E8;3.26095978E8;3.88088318E8;	999.0;921.25;144.94;133.5;128.93;110.19;	5.24896	5.16574	5.18554	5.24288	0.0356834	0.0348602	0.0176755	0.0250198	0.133813	0.149911	0.898582	0.825614	0.864132	0.986087
89	14.0203	525.239				5.2523877E8;5.2518634E8;5.25199829E8;1.31304794E8;1.31285522E8;	999.0;408.78;365.09;349.7;177.06;	4.03628	3.86816	4.03733	3.7021	0.342324	0.151444	0.136691	0.202098	0.665261	0.997797	0.459318	0.679018	1.00242	0.463255
90	14.0595	278.067				2.78066803E8;2.7907019E8;	999.0;109.53;	4.8245	4.75238	4.68591	4.86541	0.0531134	0.0371815	0.0716769	0.0059901	0.298279	0.158904	0.520373	0.846992	0.72679	1.09876
91	14.4797	329.088				3.29087677E8;3.30090881E8;3.19058777E8;	999.0;137.4;105.33;	4.78233	4.85893	4.60959	4.90098	0.0841887	0.0850771	0.0827496	0.0406487	0.540098	0.181541	0.282483	1.19288	0.671836	1.31418
92	14.6035	355.103				3.55103302E8;3.56106567E8;3.91079926E8;4.01108734E8;4.18098816E8;	999.0;168.16;82.4;67.57;52.17;	5.32169	5.28853	5.31189	5.28446	0.0340172	0.0191116	0.0252928	0.0203662	0.42018	0.822972	0.4103	0.9265	0.977687	0.917852
93	15.0992	385.114				3.85114197E8;3.8611734E8;7.71235779E8;4.48109833E8;7.72239014E8;8.17241089E8;8.07212463E8;3.87118561E8;4.75109528E8;2.05050735E8;8.18244507E8;7.7324176E8;4.22094147E8;8.0821582E8;8.09208191E8;1.157358032E9;8.19247742E8;4.00101105E8;4.32123077E8;8.71160645E8;8.34231445E8;4.76113129E8;	999.0;178.66;125.5;62.94;45.83;32.73;18.62;18.38;14.9;12.43;12.08;11.1;7.39;6.67;4.71;4.11;1.83;1.73;1.69;1.68;1.65;1.53;	6.47353	6.43568	6.47633	6.48666	0.024507	0.0137656	0.0155871	0.0190468	0.214977	0.925616	0.697606	0.916528	1.00646	1.03071
94	15.4733	609.146				6.09146179E8;6.10149475E8;	999.0;284.39;	5.23696	5.19334	5.21546	5.207	0.0344804	0.0338469	0.0163397	0.0485968	0.393027	0.588557	0.620666	0.904445	0.9517	0.933336
95	15.5498	420.046	420.046	4-methylthiobutyl glucosinolate	2	4.20046265E8;4.22041901E8;4.2104953E8;4.36040894E8;4.23045197E8;4.88033691E8;4.72059937E8;4.38036835E8;	999.0;135.77;128.67;52.47;13.71;8.17;7.64;6.74;	5.91067	6.25523	5.83514	5.83689	0.037718	0.00870427	0.0419828	0.0565766	2.00937e-05	0.217597	0.297528	2.21088	0.840372	0.843757
96	15.626	655.152				6.55151917E8;6.5615509E8;6.45123108E8;6.72142029E8;	999.0;294.47;142.86;122.93;	5.06862	5.10678	5.1198	5.10435	0.027051	0.104201	0.0336752	0.034129	0.732172	0.270105	0.43232	1.09183	1.12506	1.08574
97	15.6647	816.725				8.16746399E8;8.16724915E8;8.16703613E8;	999.0;702.48;362.33;	3.5	3.74604	3.58193	3.5	0	0.246043	0.0819326	0	0.346594	0.346594	NA	1.76215	1.20763	1
98	15.7375	801.21				8.01209656E8;7.55203918E8;8.02212952E8;7.56207397E8;8.03215088E8;7.9118158E8;7.57210205E8;8.18199036E8;7.9218512E8;8.4519928E8;8.04217896E8;7.93177551E8;8.19202698E8;8.00223694E8;7.5821283E8;7.54301636E8;8.46202759E8;7.56108459E8;7.94181458E8;7.99194641E8;8.69197083E8;8.40220459E8;8.54120911E8;1.133310303E9;1.133812378E9;8.20204895E8;8.23191101E8;8.55127258E8;9.01134521E8;8.43220032E8;1.134314087…	999.0;605.14;371.6;218.36;112.64;73.75;59.52;51.98;28.06;23.59;21.58;20.51;16.96;15.37;10.21;9.21;9.11;7.19;6.84;4.96;4.78;4.7;4.58;4.09;3.49;3.44;3.08;3.08;2.95;2.73;2.33;1.88;	6.69135	6.65086	6.64996	6.64817	0.0297992	0.0344909	0.0111205	0.0151183	0.400377	0.229404	0.273057	0.910998	0.909102	0.905356
99	16.051	739.033				7.39032776E8;3.06076508E8;	999.0;929.21;	3.5	3.65404	3.66774	3.70313	0	0.15404	0.123832	0.13447	0.346594	0.212569	0.129145	1.42574	1.47143	1.59634
100	16.1148	385.114				3.85113983E8;4.31119354E8;3.86117249E8;4.21090668E8;4.48109558E8;4.32122772E8;	999.0;270.65;162.95;90.9;55.88;51.29;	5.60659	5.61133	5.56334	5.60301	0.00966218	0.0228609	0.0196302	0.011097	0.853333	0.0834453	0.814292	1.01097	0.905204	0.991798
101	16.231	431.192				4.311922E8;4.32195374E8;	999.0;183.99;	4.70803	4.859	4.67657	4.73821	0.0197895	0.0159412	0.018076	0.0227613	0.000345443	0.274276	0.348729	1.4157	0.930127	1.07196
102	16.2917	639.156				6.39156494E8;6.85161987E8;6.40159912E8;6.86165466E8;	999.0;501.07;280.91;126.1;	4.95576	4.92106	4.91607	4.94941	0.0182647	0.0433655	0.0130464	0.0187699	0.481933	0.114967	0.817312	0.923211	0.912656	0.985487
103	16.3517	801.209				8.01209106E8;7.55203674E8;7.56207153E8;7.91180481E8;	999.0;796.78;272.63;124.17;	5.05837	5.06684	5.02868	5.07515	0.0231022	0.0253171	0.0170907	0.0167761	0.811012	0.331739	0.593982	1.0197	0.93392	1.0394
104	16.4361	551.177				5.51177002E8;5.81187439E8;3.9916925E8;	999.0;383.22;283.83;	5.07048	5.09931	5.0716	4.99895	0.0379375	0.0277167	0.0250442	0.0284229	0.556503	0.980876	0.19356	1.06864	1.00259	0.84815
105	16.4956	172.098				1.72097794E8;2.16087692E8;5.55171936E8;	999.0;346.65;69.57;	4.73692	4.54749	4.80825	4.66102	0.04413	0.0232187	0.0333068	0.0141389	0.00524527	0.233024	0.184459	0.6465	1.17851	0.839655
106	16.6177	352.104				3.52103577E8;3.53106873E8;	999.0;157.79;	4.88697	4.81641	4.84572	4.87367	0.0146996	0.0143111	0.00982477	0.0308661	0.00883666	0.0479274	0.688585	0.850055	0.909387	0.969846
107	16.9028	217.108				2.17108078E8;2.18111389E8;	999.0;98.46;	5.1123	4.96068	5.07959	5.10782	0.0238099	0.0197474	0.00879867	0.00876054	0.00119164	0.233612	0.877865	0.705315	0.92746	0.98975
108	16.9614	551.177				5.51177063E8;5.52180359E8;5.87153687E8;6.14172485E8;5.531828E8;5.8915094E8;5.88157166E8;3.89124176E8;	999.0;279.1;98.05;55.04;45.27;24.83;23.28;12.74;	5.57396	5.60053	5.57811	5.51544	0.0460692	0.0227318	0.0363241	0.0242855	0.619073	0.945298	0.33413	1.06308	1.00961	0.873927
109	17.347	739.21				7.39209534E8;7.85214966E8;7.40212891E8;1.109820068E9;1.109318481E9;7.86218445E8;1.110321533E9;7.4121521E8;1.110822998E9;7.87220703E8;1.111324463E9;7.42217896E8;7.38335876E8;1.111825684E9;7.84258423E8;1.108212646E9;1.10771228E9;1.11143103E9;3.70108276E8;3.6998288E8;	999.0;364.88;336.02;160.57;151.43;128.33;104.84;87.32;45.51;32.35;18.47;12.74;10.6;5.24;3.97;2.22;1.82;1.34;1.29;1.22;	7.0761	7.06932	7.05976	7.05969	0.00626578	0.00879215	0.00628803	0.00420647	0.547534	0.103009	0.0797084	0.98451	0.963085	0.962933
110	17.347	1127.81				1.127808228E9;1.128308838E9;1.128809326E9;1.110928467E9;	999.0;710.65;586.52;143.42;	4.95379	4.64459	4.94345	4.93012	0.0126272	0.286277	0.0115718	0.0135844	0.312028	0.562882	0.24459	0.490678	0.97648	0.946947
112	17.3787	775.186				7.75186462E8;7.76189819E8;7.771828E8;	999.0;327.6;191.88;	5.53354	5.52096	5.5263	5.52068	0.00774344	0.00851757	0.00888555	0.00963329	0.306035	0.556146	0.326365	0.971434	0.98347	0.970807
113	17.3947	816.762				8.16761902E8;1.31250534E8;	999.0;231.22;	3.5	3.69466	3.5	3.79334	0	0.194658	0	0.29334	0.346594	NA	0.292352	1.56552	1	1.9649
114	17.6152	551.177				5.51177307E8;5.52180542E8;5.971828E8;5.87153992E8;	999.0;280.22;128.01;97.5;	5.06024	5.25056	5.10225	5.16542	0.110975	0.0504782	0.153026	0.0234491	0.157123	0.829679	0.436657	1.54997	1.10158	1.27402
115	17.774	194.928				1.94927841E8;9.83871704E8;5.0599649E8;1.31579788E8;2.34080887E8;5.26757263E8;	999.0;194.53;165.05;40.69;39.46;30.83;	3.85556	3.73575	3.81012	3.54317	0.241282	0.144396	0.153606	0.0431749	0.681276	0.87771	0.295309	0.758907	0.900657	0.487094
116	17.8699	492.104	492.104	Glucohirsutin	2	4.92104218E8;4.93107117E8;4.94100494E8;9.85216064E8;4.9510318E8;4.91629608E8;4.92579742E8;9.86219421E8;9.8721051E8;9.6960274E7;9.88214294E8;1.22966499E8;5.90072083E8;1.23085297E8;1.23045654E8;1.23006065E8;4.77866272E8;	999.0;198.98;125.56;28.82;21.55;17.5;13.12;10.2;5.8;4.81;2.22;1.4;1.16;0.82;0.78;0.65;0.3;	7.25188	7.19546	7.19724	7.18859	0.0246474	0.0212619	0.0325313	0.0176121	0.121252	0.217466	0.087984	0.878164	0.881786	0.864379
117	17.8699	1030.27				1.030274048E9;1.0312771E9;1.002242859E9;1.032268433E9;1.003245972E9;1.033272705E9;	999.0;487.48;425.35;272.61;150.53;96.79;	5.44082	5.40684	5.4003	5.44394	0.0303604	0.0292758	0.0350973	0.0198092	0.443724	0.408072	0.93782	0.924741	0.910929	1.00721
118	17.9648	816.651				8.16695496E8;8.16650757E8;	999.0;879.26;	3.5	3.88429	3.5	3.5	0	0.258632	0	0	0.175619	NA	NA	2.42267	1	1
119	18.061	639.157				6.39156982E8;5.93151672E8;8.15225952E8;6.40160461E8;	999.0;621.81;279.3;270.4;	4.85947	4.92655	4.8828	4.87438	0.0545184	0.0542986	0.0425951	0.0336665	0.408684	0.744596	0.833948	1.16704	1.0552	1.03493
120	18.2937	447.054	447.054	Glucobrassicin	2	4.47054108E8;4.48056976E8;4.49049683E8;9.6960236E7;4.50052856E8;4.79043854E8;2.2002861E8;9.40173096E8;6.68089783E8;2.83024231E8;8.95115417E8;9.12141785E8;4.63048615E8;5.45021484E8;4.35108154E8;9.41176636E8;5.46979004E8;	999.0;180.77;73.11;17.51;12.98;8.31;8.19;6.65;6.21;5.69;4.63;3.95;3.44;3.33;3.29;2.65;2.18;	6.37388	6.36589	6.23747	6.16274	0.0455239	0.0328777	0.0647001	0.0159727	0.890473	0.122943	0.00555323	0.981787	0.730449	0.61499
121	18.462	771.199				7.71198853E8;7.2519342E8;7.72202026E8;	999.0;432.26;257.33;	4.45949	4.53885	4.46033	4.48423	0.0571556	0.0431142	0.045933	0.07165	0.299859	0.991091	0.792071	1.2005	1.00195	1.05863
122	18.5595	609.146				6.09146179E8;6.10149536E8;6.5515155E8;	999.0;276.17;187.53;	5.0012	4.91074	4.94821	5.03724	0.0234939	0.0286431	0.0126271	0.0186967	0.040463	0.0822184	0.287164	0.811986	0.885148	1.08655
123	18.6642	388.074				3.88074188E8;3.89077393E8;	999.0;113.86;	4.88594	5.13435	4.74817	4.87063	0.0345295	0.021565	0.0664743	0.00547142	0.000288825	0.10317	0.709439	1.7718	0.728165	0.965359
124	18.7191	625.141				6.25141052E8;6.26144348E8;6.27146667E8;6.61117554E8;6.88136475E8;6.63114563E8;6.62121033E8;6.24461365E8;6.25822083E8;6.77154602E8;6.28148804E8;1.251289673E9;6.93128479E8;6.89140076E8;7.15136414E8;7.24058044E8;1.252293091E9;7.25065979E8;6.64117737E8;7.2310791E8;7.09102539E8;	999.0;296.32;72.43;64.13;33.51;18.33;17.49;16.44;12.57;10.72;10.54;10.18;10.15;8.85;6.83;6.23;5.73;5.64;5.0;2.98;2.67;	6.33088	6.35123	6.3216	6.27201	0.0232495	0.0488474	0.0158413	0.051046	0.716532	0.749989	0.295011	1.04798	0.97886	0.873246
125	18.8152	243.087				2.43087479E8;3.06083099E8;	999.0;682.32;	3.5	3.75989	3.85599	3.5	0	0.160149	0.219545	0	0.143288	0.143569	NA	1.81924	2.26982	1
126	18.8587	669.167				6.69167175E8;6.23161865E8;6.70170288E8;1.73081924E8;6.59138428E8;6.86157166E8;6.71172913E8;	999.0;423.38;322.51;203.98;110.53;56.18;48.97;	5.29446	5.34948	5.27345	5.32464	0.0272835	0.0639205	0.03364	0.0133676	0.451442	0.6406	0.392062	1.13505	0.95277	1.07196
127	18.9208	727.245				7.27245422E8;7.28248413E8;	999.0;337.09;	4.60852	4.73465	4.44345	4.63708	0.0205218	0.0293346	0.0232211	0.00851193	0.00781066	0.000705472	0.280846	1.33699	0.683805	1.06797
128	19.2481	609.146	609.146	Kaempferol x-O-glucoside y-O-glucoside	2	6.09146301E8;6.10149841E8;6.55152039E8;1.219300171E9;1.220303589E9;6.11152039E8;6.56155212E8;9.14223328E8;1.221306274E9;9.14724976E8;1.219802612E9;9.15226685E8;6.08492737E8;6.57157654E8;6.09801453E8;6.12154358E8;6.99141907E8;1.222309082E9;9.15728088E8;1.220805542E9;6.54422607E8;7.00145081E8;6.58159973E8;6.55882568E8;1.217449097E9;1.22115564E9;1.223311279E9;1.218291138E9;	999.0;290.76;179.56;131.1;82.67;69.89;54.02;32.05;29.12;27.46;22.2;14.64;14.08;11.76;10.37;8.72;7.58;7.35;6.48;6.16;2.43;2.36;1.91;1.86;1.68;1.42;1.22;1.19;	6.89245	6.86852	6.87113	6.89166	0.0147841	0.0167976	0.0124733	0.0104308	0.315936	0.302242	0.968017	0.946372	0.952075	0.998174
130	19.6336	496.245				4.96245239E8;4.97248688E8;5.32222168E8;	999.0;275.11;70.04;	4.90255	4.82014	4.96449	4.90064	0.019549	0.0407156	0.0120188	0.0424593	0.105503	0.0271095	0.966087	0.827161	1.1533	0.995608
131	19.8351	391.161				3.91160919E8;3.92164124E8;3.81131989E8;4.0815094E8;	999.0;178.72;82.16;40.02;	5.20533	5.40279	5.09691	5.33236	0.101715	0.0430971	0.118611	0.0432902	0.111664	0.507379	0.330318	1.57566	0.779066	1.33977
132	19.9946	350.088				3.50088074E8;3.67078217E8;3.51091461E8;3.40059357E8;3.04082672E8;2.44061462E8;3.42056458E8;6.09172668E8;1.15003761E8;1.75024826E8;6.45149414E8;3.68081573E8;3.41062744E8;3.05085999E8;3.5209201E8;3.3607254E8;3.94114258E8;1.16050652E8;	999.0;196.0;172.14;147.55;132.31;94.06;43.15;41.67;38.69;34.91;32.29;28.56;21.73;19.78;17.54;15.45;14.8;14.73;	5.98035	5.78529	5.8082	5.85205	0.0271403	0.0581713	0.0416612	0.0630884	0.016097	0.00853963	0.0826349	0.638187	0.672747	0.744233
133	20.135	579.136				5.7913562E8;5.80138977E8;6.25141174E8;1.159278564E9;5.81141296E8;6.15112549E8;6.26144531E8;1.160281982E9;6.42131165E8;6.17109558E8;5.78529724E8;1.161284912E9;6.16115906E8;6.31148987E8;6.27146851E8;6.43134583E8;6.47122986E8;8.69207214E8;5.82143677E8;6.79060608E8;8.69709106E8;6.23125732E8;6.69131042E8;6.24461548E8;6.18112915E8;8.70210815E8;1.162286987E9;	999.0;278.32;195.2;76.71;61.59;61.04;57.3;42.79;40.21;18.42;16.37;15.08;13.54;11.94;10.7;10.3;9.0;8.8;7.99;7.24;6.63;5.72;5.07;3.53;3.29;2.58;2.44;	6.45683	6.40013	6.4006	6.42606	0.0185146	0.0198336	0.0104725	0.0166851	0.0700571	0.0295682	0.268608	0.877613	0.878571	0.931617
134	20.1532	816.649				8.16649109E8;8.16703918E8;8.1667981E8;1.99101654E8;	999.0;514.21;265.87;265.34;	3.5	3.74595	3.80088	3.5	0	0.245947	0.243338	0	0.346594	0.251351	NA	1.76176	1.99931	1
135	20.3115	785.214				7.85214478E8;7.39208923E8;7.86218079E8;7.40212463E8;7.75185852E8;	999.0;840.06;353.61;268.76;84.61;	4.98763	4.97712	4.93993	5.00513	0.0419447	0.018205	0.0160799	0.017964	0.82399	0.319344	0.737139	0.976092	0.895993	1.04113
136	20.435	400.101	755.204	Quercetin-3-O-deoxyhexosehexose(1-2linked)-7-O-deoxyhexose	2	4.00101013E8;7.55203674E8;	999.0;587.51;	4.19713	4.34195	4.12712	4.19418	0.0121251	0.0283008	0.0695119	0.0235208	0.00153406	0.350185	0.908639	1.3958	0.851125	0.993225
137	20.5911	377.182				3.77181519E8;3.78184875E8;3.67152832E8;3.94171722E8;3.69149994E8;	999.0;178.78;86.89;29.39;21.32;	5.43408	5.41621	5.31706	5.49582	0.0612662	0.0262041	0.0659547	0.0324598	0.79536	0.229849	0.43804	0.95969	0.763813	1.15278
138	20.6473	431.192				4.31192169E8;4.32195465E8;4.211633E8;	999.0;201.75;68.11;	5.13934	5.17067	5.03727	5.11604	0.0365221	0.0164114	0.0514035	0.0128902	0.456531	0.144174	0.604106	1.0748	0.790551	0.947755
139	20.6898	400.101	755.203	Quercetin-3-O-deoxyhexosehexose(1-2linked)-7-O-deoxyhexose	2	4.00100983E8;7.55203491E8;4.00602631E8;7.56207153E8;	999.0;526.97;349.21;178.38;	5.12347	5.11339	5.0685	5.11089	0.015106	0.0245928	0.0135564	0.0236577	0.735725	0.0267137	0.65458	0.97704	0.881095	0.971449
140	20.7905	670.165				6.70164551E8;6.70666687E8;	999.0;872.1;	3.56391	3.5	3.62044	3.56052	0.0639147	0	0.0741488	0.0605211	0.346594	0.579564	0.970934	0.863148	1.13899	0.992216
141	20.8112	709.198				7.09198303E8;7.10201477E8;	999.0;305.42;	4.58309	4.53871	4.6208	4.57792	0.0433543	0.0275328	0.0266209	0.0325631	0.412611	0.479762	0.930024	0.902846	1.09071	0.988151
142	20.9151	496.245				4.96245239E8;4.97248688E8;5.42250854E8;5.32222107E8;5.59240967E8;	999.0;287.83;108.04;96.37;53.73;	5.34462	5.26099	5.35695	5.30292	0.0164978	0.0453311	0.0227979	0.0327203	0.12119	0.672921	0.263333	0.824829	1.02879	0.908441
143	21.1869	609.146				6.0914624E8;6.55151794E8;6.10149658E8;6.56154968E8;6.45123047E8;6.11151978E8;6.72141785E8;6.57157349E8;6.47119995E8;6.46126648E8;1.219300415E9;6.08492737E8;9.14223328E8;6.09801392E8;6.73144958E8;9.14725037E8;1.220303833E9;6.12154297E8;6.61159851E8;9.15226807E8;6.99141785E8;7.23139038E8;6.54422607E8;6.48123352E8;6.77133606E8;1.219802734E9;6.9917804E8;6.97162354E8;6.55882507E8;6.5815979E8;1.2213068…	999.0;325.67;292.71;99.97;74.53;70.52;44.85;23.08;21.1;20.24;17.02;16.69;13.22;12.85;12.44;11.75;10.52;10.1;7.25;6.09;5.49;5.39;5.37;5.1;4.81;3.84;3.62;3.52;3.41;3.33;3.29;3.22;2.09;2.07;1.84;1.75;1.54;	6.65795	6.61264	6.6619	6.61112	0.0257251	0.0449687	0.0192312	0.0433632	0.407342	0.905036	0.361508	0.90094	1.00915	0.897782
144	21.3394	508.099				5.08098785E8;5.09102448E8;	999.0;128.51;	4.75611	4.69565	4.61807	4.64496	0.037529	0.0639693	0.0634473	0.082183	0.438577	0.0980125	0.226299	0.870049	0.727712	0.774188
145	21.3394	187.861				1.87861008E8;1.59878647E8;2.57819031E8;2.55821976E8;1.41868149E8;2.14879959E8;	999.0;382.67;293.08;283.42;207.19;194.55;	4.66091	4.50606	4.76941	4.7441	0.0617904	0.0886461	0.0189301	0.0215146	0.189758	0.131665	0.289275	0.700094	1.28383	1.21114
146	21.717	593.152				5.93151794E8;8.9023114E8;8.90732971E8;8.91234131E8;1.187310303E9;1.187812866E9;1.188313721E9;8.91735779E8;5.93653503E8;1.188815796E9;8.92237061E8;6.57150696E8;8.89577026E8;8.89076294E8;8.91891052E8;1.185531982E9;	999.0;141.08;133.0;66.4;58.2;40.74;38.41;27.76;23.94;13.82;8.48;3.48;2.1;1.95;1.61;0.74;	6.93509	6.95927	6.9284	6.93137	0.00619751	0.00902771	0.00762468	0.00352698	0.0582334	0.515316	0.643649	1.05726	0.984719	0.99149
147	21.8694	311.114				3.11113586E8;3.12117004E8;3.5711911E8;3.55103455E8;	999.0;141.87;133.31;132.93;	4.81743	4.87929	4.61373	4.92599	0.0992869	0.0983428	0.080512	0.0359575	0.669735	0.149713	0.38407	1.15308	0.625612	1.28399
148	21.927	563.141				5.63141296E8;5.64144531E8;5.65146606E8;5.99117249E8;6.26136414E8;6.09146179E8;5.62559875E8;6.01114441E8;6.00120789E8;1.127288696E9;5.63723206E8;6.15154297E8;6.27139648E8;6.10149719E8;8.60220093E8;	999.0;283.46;52.43;49.82;35.47;30.52;15.11;12.13;12.02;9.95;9.23;8.94;7.5;6.75;6.24;	5.92531	5.99394	5.88435	5.90536	0.0188688	0.0188823	0.0142821	0.00756024	0.0330708	0.121758	0.402754	1.17121	0.910007	0.955104
149	22.0771	639.157				6.3915686E8;6.401604E8;6.56146851E8;6.29128357E8;6.41162537E8;6.57150391E8;1.187813232E9;6.31125305E8;6.30131592E8;8.90231323E8;8.90732849E8;6.38454346E8;1.18881604E9;6.39861206E8;6.42165161E8;8.91234558E8;1.191321533E9;	999.0;303.3;211.96;201.93;67.3;65.47;48.82;48.01;42.53;26.14;20.77;15.46;14.48;12.09;9.73;7.42;5.5;	6.29365	6.2779	6.28984	6.28159	0.015571	0.0233561	0.00679101	0.00735002	0.590149	0.828367	0.541677	0.964388	0.991276	0.972617
150	22.0771	593.152				5.93151794E8;5.92523315E8;	999.0;18.9;	6.62844	6.60693	6.62108	6.61485	0.0146567	0.0211796	0.00656341	0.00986433	0.427709	0.658742	0.491854	0.95166	0.983186	0.969189
151	22.3286	434.062	434.062	5-methylthiopentyl glucosinolate	2	4.34062012E8;4.50057037E8;	999.0;686.11;	3.5	4.38564	3.5	3.5	0	0.0273002	0	0	8.88496e-10	NA	NA	7.68488	1	1
152	22.3815	279.051				2.79051086E8;1.63040131E8;	999.0;395.7;	4.62253	4.49875	4.6029	4.65868	0.0519142	0.150819	0.0644292	0.0631609	0.460055	0.818455	0.668462	0.752003	0.955813	1.08679
153	22.487	623.162				6.23162109E8;6.24165588E8;9.35247009E8;9.35748718E8;1.247331543E9;1.248335083E9;6.25167725E8;9.36249878E8;6.23664001E8;1.247833984E9;9.36751587E8;1.249337769E9;6.22485779E8;1.248837158E9;6.23840088E8;9.3725293E8;1.250340698E9;6.46164612E8;9.37754272E8;6.68414673E8;9.34003296E8;1.245417236E9;9.34504272E8;	999.0;287.7;123.26;117.14;116.12;76.85;68.67;65.06;32.95;31.91;25.94;22.98;14.38;11.57;10.65;7.26;5.46;2.83;1.85;1.82;1.24;1.19;1.13;	6.85711	6.82629	6.84412	6.85468	0.00925493	0.00741869	0.0113364	0.00828699	0.0316939	0.400621	0.854716	0.931492	0.970531	0.994429
154	22.6472	422.059	422.059	Gluconasturtiin	2	4.22058533E8;4.23062073E8;4.24054504E8;	999.0;144.23;78.82;	5.07058	5.14914	4.91653	4.89012	0.0171074	0.0761078	0.0672485	0.115747	0.343365	0.0571704	0.124741	1.19829	0.701365	0.65999
155	22.7313	565.193				5.65192749E8;5.66195984E8;5.55164063E8;5.3716156E8;5.82182678E8;	999.0;290.27;68.38;34.4;28.38;	5.29513	5.37821	5.19691	5.29463	0.013783	0.0292234	0.0285684	0.0189859	0.0330621	0.0147464	0.983369	1.21082	0.797599	0.998864
156	22.8374	521.203				5.21202881E8;5.2220636E8;	999.0;210.37;	4.50662	4.48509	4.56641	4.46567	0.0191999	0.0434345	0.0159094	0.0408165	0.662373	0.0433259	0.361485	0.951641	1.14759	0.91003
157	22.9429	393.176				3.93176483E8;3.94179779E8;3.83147644E8;	999.0;173.74;92.12;	4.861	5.09282	4.7123	5.01305	0.111154	0.0359925	0.146204	0.0477072	0.0825192	0.441534	0.289947	1.70537	0.710056	1.4192
158	23.1064	392.103				3.92103485E8;4.15106262E8;3.92605286E8;7.85214478E8;4.15608002E8;7.39208862E8;7.86217651E8;3.93106415E8;3.87089294E8;	999.0;477.05;364.18;279.29;195.46;163.11;100.24;69.33;41.18;	5.37021	5.3652	5.35864	5.3473	0.0410283	0.0205569	0.0295801	0.011286	0.915761	0.824823	0.64476	0.988531	0.973714	0.948616
159	23.4215	593.151				5.93151245E8;5.94154541E8;6.39156616E8;6.40159973E8;6.29127991E8;1.187309692E9;5.95156799E8;6.56146606E8;1.188312988E9;8.90230347E8;6.31124939E8;6.30131409E8;8.90732178E8;6.41162354E8;6.45164612E8;5.92523132E8;6.57150085E8;1.189315674E9;5.93780884E8;6.61138428E8;7.39081604E8;8.91233704E8;5.9615918E8;6.81167542E8;6.83183167E8;	999.0;296.97;263.34;90.9;77.6;71.13;62.68;56.83;42.19;23.5;21.35;20.48;20.38;18.16;15.85;15.61;14.28;14.02;12.11;11.66;9.96;9.8;5.97;5.07;5.03;	6.27393	6.16065	6.23276	6.26882	0.0187595	0.0145321	0.0216184	0.0166611	0.00140118	0.188272	0.848457	0.770391	0.909555	0.988281
160	23.5805	463.088				4.63088226E8;4.64091522E8;4.99064972E8;4.65093597E8;9.27183777E8;5.1510199E8;5.01062073E8;	999.0;231.7;40.82;26.86;19.25;9.78;9.6;	5.72881	5.73933	5.74543	5.71821	0.0157875	0.0466397	0.0303944	0.0139028	0.836112	0.640497	0.639712	1.02453	1.03901	0.975891
161	23.6398	525.21				5.25209961E8;5.25194458E8;1.31289337E8;1.31261856E8;1.31234467E8;1.31227341E8;	999.0;653.18;607.56;297.06;156.18;153.71;	3.70479	3.75789	4.02261	3.56443	0.128011	0.131718	0.0721182	0.0644328	0.779869	0.0624893	0.397565	1.13005	2.07881	0.723841
162	23.6616	211.061				2.11061127E8;4.15124634E8;	999.0;598.98;	4.69199	4.49122	4.43746	4.85137	0.129739	0.0757448	0.166128	0.0460802	0.218179	0.261708	0.330956	0.629841	0.556501	1.44335
163	23.8242	739.209				7.3920874E8;7.4021228E8;	999.0;339.3;	4.59111	4.76652	4.60119	4.56215	0.0222948	0.0217376	0.0166546	0.00830936	0.00049095	0.726568	0.307483	1.49763	1.02348	0.935495
164	24.0151	593.151				5.93151062E8;6.39156555E8;5.94154541E8;5.63140564E8;	999.0;275.83;264.97;57.73;	4.89824	4.79526	4.87352	4.87395	0.0263521	0.0321828	0.0168867	0.0234993	0.0383654	0.452272	0.524947	0.788898	0.944653	0.945595
165	24.1169	506.119	506.119	9-(Methylthio)nonyl glucosinolate; S-Oxide	2	5.06119293E8;5.07122955E8;5.0811557E8;	999.0;129.72;115.68;	4.80493	4.59325	4.71693	4.64743	0.041132	0.045818	0.0459286	0.0377963	0.00885108	0.191352	0.0284508	0.614215	0.816589	0.695818
166	24.205	679.151				6.79151306E8;6.80154724E8;	999.0;274.1;	4.48048	4.50639	4.49056	4.35147	0.0595225	0.0735695	0.019789	0.063087	0.791221	0.876382	0.183081	1.06146	1.02347	0.742993
167	24.2907	533.166				5.33166443E8;5.79171875E8;5.34170044E8;	999.0;554.01;161.73;	4.44046	4.5934	4.48815	4.44243	0.0309189	0.0305416	0.0376401	0.0112854	0.00785793	0.356295	0.958449	1.42211	1.11605	1.00454
168	24.4167	539.167				5.39167297E8;5.40170959E8;5.41162842E8;	999.0;176.52;94.96;	4.71238	4.47402	4.74647	4.61999	0.0314849	0.0585718	0.06696	0.0209374	0.00714142	0.657243	0.0549443	0.577616	1.08166	0.808374
169	24.6015	309.061				3.09061432E8;1.93050629E8;	999.0;272.55;	4.58216	4.55876	4.57239	4.58208	0.0270096	0.112716	0.0275956	0.0543554	0.845047	0.806691	0.998935	0.947546	0.977761	0.999819
170	24.7882	623.162				6.23162354E8;5.7715686E8;6.24165649E8;8.66239075E8;5.78160278E8;8.66740601E8;1.155321045E9;1.156324463E9;1.155822998E9;8.67242004E8;6.25167847E8;6.40152039E8;8.67743408E8;1.156826172E9;5.79162659E8;1.157327515E9;6.22486084E8;6.41155457E8;6.23840271E8;8.68244812E8;5.76553955E8;6.26170227E8;5.77761108E8;1.158329468E9;1.20132666E9;6.42157776E8;6.67152161E8;8.65130432E8;8.65630859E8;8.67852295E8;1.15…	999.0;618.44;312.05;181.59;178.39;165.37;133.29;95.07;92.6;91.73;77.51;50.37;35.41;30.16;29.47;19.77;15.05;14.87;11.58;9.84;9.39;7.99;7.25;3.73;3.2;3.15;2.88;2.53;2.35;2.01;1.84;1.57;0.98;	7.09543	7.07805	7.09895	7.10033	0.0129993	0.00943362	0.00298772	0.00347465	0.310662	0.798675	0.754387	0.960764	1.00813	1.01134
171	24.852	917.236				9.17236145E8;9.18239807E8;9.19242432E8;1.036279053E9;1.036780762E9;1.037282349E9;9.20245117E8;1.206820923E9;9.16028259E8;1.206319214E9;1.207322388E9;5.2613031E8;	999.0;448.92;131.21;116.36;95.82;47.8;26.81;21.84;15.4;15.29;12.09;5.41;	6.06305	6.11578	6.03017	6.01033	0.0172775	0.0237284	0.021487	0.00785982	0.110176	0.267158	0.0387685	1.12908	0.927075	0.885683
172	24.9014	339.072				3.39072388E8;2.23061371E8;6.79152039E8;3.40075714E8;6.80155457E8;2.24064713E8;3.41075867E8;6.81157898E8;3.87057343E8;3.71062347E8;7.11142456E8;1.15003906E8;	999.0;243.38;172.96;160.29;56.43;27.6;14.89;11.21;4.01;3.51;3.33;3.24;	6.35506	6.4441	6.33822	6.31331	0.0358318	0.0259553	0.0395363	0.0259872	0.078959	0.760452	0.4001	1.22757	0.961979	0.908349
173	25.2422	339.072				3.39072144E8;5.05135284E8;3.40075348E8;5.0613858E8;8.452146E8;3.89124146E8;5.35145691E8;2.24064545E8;	999.0;568.29;163.92;145.18;22.39;16.21;11.26;10.97;	5.83003	5.93294	5.8215	5.77334	0.0120121	0.0169679	0.0198231	0.0284169	0.00112065	0.722513	0.0863963	1.26739	0.980558	0.877622
174	25.4197	433.078				4.3307782E8;4.34081146E8;	999.0;200.64;	5.09017	4.98948	5.03432	5.02813	0.0243885	0.028688	0.0246385	0.0120205	0.0281862	0.145817	0.0743118	0.793073	0.879317	0.866877
175	25.5147	653.173				6.53172546E8;6.07167175E8;6.54175903E8;6.08170532E8;9.11254517E8;9.1175592E8;6.70162292E8;6.55178162E8;1.215341675E9;6.09173096E8;6.4314447E8;9.12257568E8;1.216344971E9;6.71165649E8;1.21584436E9;9.12759216E8;6.52447021E8;6.06516846E8;1.217348267E9;6.56180725E8;6.53900208E8;6.07819153E8;1.21684729E9;6.10175537E8;9.29744507E8;9.29242981E8;9.1326062E8;6.97198853E8;6.95183228E8;6.72168152E8;9.3024499…	999.0;903.84;291.17;273.69;113.73;105.14;92.09;81.11;74.33;61.27;57.83;56.8;48.88;28.83;22.55;22.32;16.21;14.67;14.14;12.36;11.96;11.29;7.61;7.59;6.92;6.83;6.6;5.55;5.36;5.18;3.0;2.75;2.32;	6.7926	6.73429	6.77764	6.78045	0.012667	0.0172971	0.0125955	0.0144188	0.0262672	0.426684	0.54583	0.874369	0.966143	0.972405
176	25.5494	577.157				5.7715686E8;5.78160278E8;	999.0;248.11;	4.50722	4.58099	4.49344	4.48076	0.0104897	0.0292985	0.0102938	0.0130552	0.0452026	0.375847	0.153222	1.18515	0.968766	0.940882
177	25.8811	505.135				5.05135223E8;5.06138519E8;	999.0;253.21;	5.0224	5.24864	5.04434	5.00139	0.0134631	0.021633	0.0132933	0.0116353	2.0465e-05	0.279506	0.290452	1.68362	1.05183	0.952784
178	25.8995	519.187				5.19187195E8;5.65192749E8;	999.0;838.32;	4.47811	4.46891	4.5266	4.4861	0.0194197	0.0313904	0.0167912	0.0308171	0.809557	0.0955858	0.825335	0.979051	1.11813	1.01858
179	26.6868	417.177				4.17176605E8;3.73186646E8;4.18179779E8;3.74189819E8;	999.0;936.48;193.6;155.09;	4.74124	4.91087	4.6222	4.89645	0.0877474	0.0502795	0.0848456	0.0503113	0.132007	0.358	0.196979	1.47784	0.76026	1.4296
180	27.0553	447.093				4.47093201E8;4.48096558E8;4.93098846E8;4.83070099E8;5.1008905E8;4.85067169E8;	999.0;242.12;77.91;66.86;59.06;15.71;	5.57319	5.52606	5.61496	5.54426	0.0362505	0.0594931	0.012081	0.0331766	0.517775	0.306174	0.583712	0.897154	1.10095	0.935538
181	27.306	687.167	687.167	dn-oPDA–DGMG isomer	3	6.87167236E8;6.87668823E8;6.88170105E8;	999.0;664.43;271.85;	4.00626	3.94885	4.00161	4.06427	0.176135	0.187013	0.207034	0.146587	0.828768	0.986777	0.814112	0.876173	0.989355	1.14292
182	27.5935	477.104				4.77103821E8;4.78107239E8;9.55214722E8;4.79109283E8;5.40099487E8;9.56218262E8;4.76650665E8;5.13080566E8;5.29117615E8;4.77557831E8;5.4509137E8;	999.0;241.37;40.95;33.23;26.8;17.88;16.48;14.24;9.92;9.71;9.44;	5.92928	5.79647	5.89518	5.89042	0.00913287	0.0311693	0.0229282	0.014877	0.00348996	0.204387	0.0525726	0.736524	0.924478	0.914416
183	28.163	402.09				4.02089691E8;4.03092957E8;4.0408548E8;	999.0;129.18;91.83;	5.33478	5.55536	5.23436	5.31806	0.0263414	0.0366429	0.0554772	0.0248481	0.0012123	0.140627	0.664884	1.6618	0.793545	0.962225
184	28.3326	373.187				3.73186615E8;4.17176514E8;3.85150299E8;3.7418985E8;	999.0;705.5;480.37;154.16;	4.75022	4.8281	4.43467	4.88316	0.095296	0.0607907	0.237612	0.0455612	0.510314	0.252718	0.286484	1.19641	0.483552	1.35812
185	28.3326	477.198				4.77197754E8;4.78201111E8;	999.0;187.36;	4.63762	4.54946	4.62894	4.48934	0.0367152	0.0918805	0.103404	0.119998	0.39893	0.938872	0.232002	0.816281	0.980205	0.710744
186	28.6476	385.15				3.85150238E8;3.86153473E8;	999.0;156.25;	4.71139	4.84803	4.65157	4.80123	0.0484989	0.0376975	0.0489249	0.0263937	0.056779	0.410522	0.175935	1.36976	0.871331	1.22982
187	28.9043	687.167				6.87167114E8;6.87668823E8;	999.0;831.58;	3.5	3.5	3.5	3.5	0	0	0	0	NA	NA	NA	1	1	1
188	29.1002	1058.4				1.058398071E9;1.059401489E9;1.060404175E9;1.094374878E9;1.06140686E9;	999.0;520.77;175.01;41.97;37.23;	5.46008	5.3326	5.29982	5.4515	0.0134638	0.0279415	0.0401479	0.02667	0.00339003	0.00535281	0.767912	0.745624	0.691416	0.980441
189	29.2473	187.861				1.87860977E8;1.60842056E8;1.59878632E8;1.41868118E8;1.64836075E8;2.57819031E8;2.55821976E8;1.61875687E8;1.99804993E8;2.14879974E8;	999.0;809.84;484.06;390.33;332.53;328.51;299.2;247.1;237.71;233.38;	4.8934	4.61955	4.93177	4.96909	0.0649703	0.0860739	0.0546831	0.0518256	0.0347491	0.663376	0.411045	0.532302	1.09237	1.19041
190	29.2699	816.672				8.16695007E8;8.16672363E8;	999.0;937.44;	3.55069	3.69743	3.5	3.5	0.0506876	0.197426	0	0	0.492074	0.346594	0.407084	1.40197	0.889841	0.889841
191	29.5581	447.093				4.4709317E8;4.48096558E8;	999.0;215.24;	5.02754	4.83093	5.03795	4.99257	0.0330219	0.0200635	0.0303196	0.018689	0.000943433	0.822115	0.420659	0.635907	1.02427	0.922635
192	30.0488	535.146				5.35145691E8;5.36149048E8;	999.0;270.46;	5.11226	5.19309	5.1463	5.04333	0.0238456	0.0198407	0.0202382	0.0281761	0.0313319	0.308115	0.102107	1.20458	1.08154	0.85325
193	30.1314	764.303				7.64303406E8;7.65306824E8;	999.0;438.1;	3.5	3.5	3.5	3.5	0	0	0	0	NA	NA	NA	1	1	1
194	30.4838	477.064	477.064	Neoglucobrassicin	2	4.77064301E8;4.7806781E8;	999.0;166.52;	4.99326	4.6674	4.82953	4.6744	0.0952465	0.0884065	0.110042	0.0202829	0.0365128	0.293216	0.022564	0.47222	0.685921	0.479896
195	30.587	816.668				8.16686035E8;8.16668152E8;	999.0;627.66;	3.55159	3.67902	3.5	3.5	0.0515938	0.179022	0	0	0.513318	0.346594	0.407084	1.341	0.887986	0.887986
196	30.8283	431.098				4.31098358E8;4.77103851E8;4.32101532E8;4.78107208E8;4.67075073E8;4.94094055E8;	999.0;672.75;215.12;149.08;98.42;89.57;	5.35467	5.33666	5.37658	5.34778	0.0328359	0.0420002	0.0237446	0.0217431	0.744176	0.60345	0.873874	0.959376	1.05174	0.984261
197	31.2936	1144.4				1.14439856E9;1.145401855E9;	999.0;487.52;	4.52144	4.41588	4.35608	4.47675	0.0154779	0.0331723	0.0415056	0.00494777	0.0203968	0.00576449	0.042748	0.784228	0.683353	0.90223
198	31.4859	447.093	447.093	Kaempferol 3-O-glucoside	1	4.47093231E8;4.93098816E8;4.48096619E8;4.94102203E8;5.10088959E8;4.83070129E8;	999.0;662.59;217.83;143.4;93.57;80.09;	5.17798	4.97777	5.31345	5.29671	0.0486635	0.0554144	0.00865926	0.021019	0.0264605	0.0254228	0.0806424	0.630647	1.36605	1.31442
199	31.8487	816.646				8.16646179E8;8.16680908E8;	999.0;741.82;	3.5	3.64842	3.5	3.5	0	0.148423	0	0	0.346594	NA	NA	1.40742	1	1
200	32.9036	720.277	720.277	N1,N5,N1-Tri-(hydroxyferuloyl)-spermidine	4	7.20277405E8;7.21280823E8;7.22283508E8;7.18261902E8;7.19265503E8;7.34256409E8;7.56254089E8;7.83273132E8;7.42259216E8;7.1943689E8;7.23286316E8;7.26285278E8;7.73188599E8;	999.0;404.01;95.54;80.87;26.79;20.27;19.85;17.03;16.15;14.86;13.45;11.02;8.77;	5.8763	5.85065	5.77938	5.80302	0.0234427	0.0291663	0.0242369	0.0124286	0.512421	0.0206904	0.038096	0.942649	0.79998	0.844734
201	32.9669	591.172	591.172	sinapoyl (206 Da)- chlorogenic acid methyl ester conjugate	3	5.91171997E8;5.92175415E8;5.93177795E8;	999.0;305.54;49.67;	5.40318	5.3173	5.38812	5.36158	0.0243029	0.0161879	0.0272735	0.0366459	0.0186811	0.690967	0.358874	0.82058	0.965916	0.90865
202	33.045	411.202				4.11202332E8;4.12205841E8;4.57207977E8;4.55192322E8;	999.0;248.41;241.88;200.95;	4.46967	4.5466	4.2473	4.68441	0.109246	0.085283	0.0689747	0.0456717	0.594031	0.123527	0.143094	1.19379	0.599278	1.6396
203	33.8505	373.187				3.73186676E8;3.74190002E8;4.19192108E8;4.53153259E8;4.17176422E8;	999.0;193.78;159.47;91.08;69.5;	4.84583	4.99251	4.4731	5.1169	0.20135	0.0623956	0.268748	0.06089	0.506246	0.299271	0.285603	1.40177	0.423909	1.86669
204	34.2975	734.293				7.34292847E8;7.35296509E8;	999.0;389.7;	4.76479	4.65379	4.59647	4.63487	0.0394398	0.0131792	0.0673907	0.0699145	0.0284016	0.0632246	0.130981	0.774478	0.678713	0.741461
205	34.9134	734.293				7.34292847E8;7.35296448E8;7.36299438E8;7.32277344E8;	999.0;403.86;94.81;57.11;	5.18805	5.08051	4.98636	5.05193	0.0419489	0.0272947	0.0683926	0.073329	0.0638853	0.0361511	0.132903	0.780646	0.628498	0.730932
206	35.263	840.221				8.40221069E8;8.41223938E8;	999.0;400.94;	3.5	3.5	3.98663	3.56599	0	0	0.162444	0.065988	NA	0.0171839	0.292352	1	3.06643	1.16409
207	35.2855	734.293				7.34292847E8;7.3529657E8;	999.0;343.75;	4.74721	4.66132	4.58905	4.64669	0.0372599	0.0294435	0.0769843	0.0434304	0.108129	0.10159	0.120763	0.820565	0.694764	0.793386
208	35.432	667.282				6.67281677E8;6.68285156E8;6.57253479E8;	999.0;308.71;61.49;	4.92802	4.87734	4.94555	4.86895	0.0647146	0.0781303	0.0847305	0.0777444	0.630818	0.87348	0.574161	0.88985	1.04119	0.872827
209	35.7996	165.979				1.6597905E8;2.13963776E8;1.81973984E8;1.67974777E8;1.66982361E8;	999.0;138.74;114.96;88.17;71.34;	4.2731	5.04631	5.26596	4.80997	0.209682	0.185088	0.152051	0.214944	0.0245024	0.00499479	0.12032	5.93202	9.83675	3.44247
210	36.0716	734.293				7.34293274E8;7.35296509E8;7.36299072E8;7.04283081E8;7.32278198E8;7.70269531E8;7.05286377E8;7.97288696E8;7.33428101E8;7.37302124E8;7.71273132E8;7.33281799E8;7.66282898E8;7.72265442E8;7.56274719E8;7.48271729E8;7.98292358E8;7.40300964E8;7.06289307E8;7.78283264E8;7.49276001E8;7.8821228E8;7.67287231E8;7.76267212E8;7.73269409E8;7.57278015E8;7.82277771E8;8.33210266E8;7.50288391E8;7.87204712E8;7.41304443…	999.0;424.02;109.07;71.16;39.39;37.86;29.14;24.22;17.45;16.64;15.4;15.4;13.73;10.94;10.66;10.41;9.07;7.44;6.54;5.44;4.5;4.41;3.97;3.56;3.49;3.45;3.35;2.72;2.56;2.54;2.49;2.47;	6.65014	6.56035	6.61252	6.59867	0.0163656	0.0407024	0.0226412	0.0476543	0.0748986	0.215027	0.298075	0.813234	0.917026	0.888256
211	36.3938	816.65				8.16649658E8;8.16619324E8;	999.0;405.04;	3.5	3.67444	3.5	3.58035	0	0.174441	0	0.0803475	0.346594	NA	0.292352	1.49431	1	1.20323
212	36.6126	431.098	431.098	Kaempferol deoxyhexose	2	4.3109848E8;4.32101624E8;4.67075104E8;4.94094208E8;	999.0;231.87;55.76;36.56;	5.44696	5.33326	5.64297	5.59949	0.0441735	0.0632217	0.0441249	0.0329043	0.178653	0.013818	0.0335319	0.769664	1.57041	1.42081
213	37.7507	461.109	461.109	3-methylquercetin deoxyhexose	2	4.61108978E8;5.07114594E8;4.62112457E8;	999.0;645.68;219.82;	4.58537	4.27077	4.77257	4.70751	0.0833463	0.0959455	0.038346	0.0459968	0.0383902	0.0756193	0.273407	0.484627	1.53887	1.32479
214	38.0327	416.105				4.16105408E8;4.17108948E8;4.18101227E8;	999.0;136.84;73.06;	4.95707	5.10438	4.85479	4.95117	0.0217602	0.0345175	0.0537954	0.0574245	0.00687884	0.11602	0.91937	1.40383	0.790183	0.986525
215	38.0698	131.32				1.31293396E8;1.31319778E8;	999.0;790.26;	3.5	3.5	3.806	3.5	0	0	0.18789	0	NA	0.14205	NA	1	2.023	1
216	38.6671	707.313	707.313	dn-oPDA–DGMG isomer (detected as formic acid adduct)	4	7.0731311E8;7.08316528E8;	999.0;329.32;	3.82774	3.72835	4.35526	3.94011	0.150047	0.107669	0.14754	0.0951638	0.605113	0.0365489	0.571945	0.79545	3.3692	1.29531
217	39.7218	688.287				6.88287415E8;6.89291016E8;6.9029425E8;7.24264465E8;	999.0;381.45;71.09;43.77;	5.28955	5.20587	5.25456	5.22089	0.0253051	0.0439203	0.0143871	0.0401758	0.137369	0.263734	0.174914	0.824744	0.922595	0.853783
218	40.5583	389.03				3.89030457E8;3.90033844E8;	999.0;135.04;	4.91006	4.62298	4.97033	4.84228	0.0960103	0.11902	0.0622249	0.048959	0.0973048	0.612607	0.58067	0.516326	1.14888	0.855492
219	40.9292	271.061				2.71061127E8;2.72064514E8;	999.0;138.74;	4.81769	4.59245	4.76676	4.74553	0.0665808	0.0826303	0.0337684	0.0850708	0.0665573	0.514331	0.518753	0.595331	0.889334	0.84692
220	41.407	271.061				2.71061157E8;2.72064484E8;	999.0;158.2;	5.41326	5.40447	5.56949	5.25223	0.124037	0.137389	0.0402821	0.10845	0.96329	0.265198	0.374727	0.979965	1.43297	0.690204
221	43.1589	545.26				5.45260498E8;5.46263855E8;5.35231812E8;	999.0;281.51;81.32;	4.63046	4.67849	5.13099	4.89713	0.218157	0.191633	0.0624584	0.0974199	0.87272	0.0584678	0.342211	1.11695	3.16615	1.84786
222	43.5008	403.046				4.03046326E8;4.04049591E8;4.05041901E8;4.07041077E8;4.06045227E8;9.6960213E7;4.71033691E8;4.05053284E8;4.55059845E8;	999.0;156.44;131.66;25.24;17.48;15.27;11.05;6.79;5.66;	5.80526	5.58379	5.8661	5.75986	0.0704413	0.0862383	0.0478161	0.0327477	0.0819084	0.495203	0.609362	0.600525	1.15036	0.900742
223	43.5235	672.293				6.72292664E8;6.73296326E8;7.18298401E8;7.08268982E8;6.7429895E8;	999.0;393.81;108.29;60.5;46.96;	4.96271	4.97241	4.9484	4.92831	0.0403168	0.0683763	0.0364672	0.0341197	0.905744	0.799095	0.549165	1.02259	0.967598	0.923856
224	44.1435	709.329	709.329	dn-oPDA–DGMG derivative	4	7.09328857E8;7.10332214E8;	999.0;339.07;	3.87222	3.86043	4.3973	4.12644	0.15677	0.102642	0.099617	0.0522654	0.951372	0.0222558	0.208683	0.973216	3.35026	1.79562
225	44.231	407.265				4.07265045E8;4.08268402E8;	999.0;177.73;	4.69065	4.63234	4.59364	4.62601	0.0450186	0.0227549	0.0606719	0.041184	0.280973	0.235052	0.33584	0.87434	0.799813	0.861696
226	44.9549	661.308	661.308	dn-oPDA–DGMG	3	6.61307678E8;7.07313293E8;	999.0;856.27;	3.66032	3.5453	4.1774	4.19981	0.160315	0.0452965	0.179911	0.0436499	0.509459	0.0641943	0.0228571	0.767328	3.28915	3.46332
227	45.2849	242.176				2.42176178E8;2.43179565E8;	999.0;105.53;	4.6398	4.58186	4.56067	4.56088	0.173832	0.033171	0.0882467	0.0567453	0.751793	0.695468	0.709435	0.875117	0.833438	0.833842
228	46.6752	725.324				7.25323853E8;7.26327271E8;6.79318359E8;7.15295044E8;	999.0;348.98;328.67;117.23;	4.1302	4.0643	4.69569	4.49907	0.257364	0.196	0.18185	0.196146	0.843658	0.110483	0.312428	0.859204	3.67694	2.33813
229	47.405	255.822				2.55822083E8;2.57819153E8;	999.0;910.42;	4.40604	4.2203	4.37885	4.38493	0.0199591	0.180103	0.0137564	0.0125693	0.335351	0.29456	0.429675	0.652023	0.939315	0.95257
230	47.5302	736.348				7.36348083E8;7.37350586E8;7.25315735E8;	999.0;242.04;199.64;	4.33907	4.37247	4.83009	4.62536	0.251555	0.203632	0.0874495	0.075152	0.920329	0.102458	0.360719	1.07996	3.0976	1.93327
231	47.5723	459.109				4.59109253E8;4.6011261E8;4.61105011E8;4.63104187E8;	999.0;190.97;135.48;73.55;	4.84157	4.94074	4.76938	4.75449	0.173576	0.165947	0.210833	0.287721	0.690477	0.798196	0.793569	1.25652	0.846856	0.818312
232	47.6369	647.292				6.47292419E8;6.48295959E8;	999.0;321.02;	4.44898	4.4236	3.82122	4.30026	0.085251	0.0930417	0.146724	0.206396	0.845612	0.0060477	0.492589	0.943231	0.235633	0.710027
233	47.682	735.345				7.35345032E8;5.47276672E8;5.0127124E8;5.37247925E8;	999.0;865.95;77.76;60.92;	5.01797	5.04142	5.38346	5.20888	0.146694	0.112654	0.0576211	0.0551472	0.902253	0.0489967	0.306935	1.05547	2.31998	1.55203
234	47.7933	499.255	499.255	dn-OPDA-MGMG	3	4.99255463E8;5.0025882E8;5.45261047E8;5.35232117E8;	999.0;261.25;251.53;77.93;	4.61361	4.66095	5.08713	4.95276	0.158742	0.090849	0.0613319	0.0308547	0.802313	0.0238331	0.104724	1.11516	2.97521	2.18344
235	47.9	563.272				5.63271667E8;5.64275085E8;5.17266174E8;5.53243042E8;5.18269714E8;5.65277466E8;7.67371399E8;5.80261658E8;	999.0;289.49;239.01;76.87;61.36;49.73;31.49;31.05;	4.82757	5.04281	5.42382	5.26026	0.34971	0.167785	0.116274	0.111513	0.594125	0.144349	0.324627	1.64149	3.94679	2.70823
236	47.9653	753.356				7.53355835E8;7.54359375E8;7.07350403E8;7.55361694E8;7.08353882E8;7.43327087E8;5.7329248E8;7.36348877E8;6.67282898E8;7.44330994E8;7.70346863E8;5.74295837E8;7.45323486E8;7.09356567E8;	999.0;375.93;268.77;100.23;95.07;75.48;73.1;39.55;33.56;26.57;25.18;21.07;20.96;20.65;	4.98222	5.2262	5.65718	5.56016	0.386383	0.169512	0.105578	0.106892	0.57901	0.130462	0.238074	1.75379	4.73105	3.7839
238	48.0077	627.303				6.27302979E8;8.21382385E8;7.49397888E8;	999.0;565.27;526.85;	3.93715	4.10225	3.6666	3.79756	0.227644	0.209372	0.166599	0.171893	0.607986	0.365606	0.654828	1.46251	0.536353	0.725125
239	48.0927	1007.51				1.007508057E9;8.3143927E8;9.93492065E8;1.081581421E9;7.61397888E8;9.94495667E8;9.47486572E8;1.082585205E9;9.06515991E8;	999.0;814.17;711.6;539.28;485.38;369.3;348.83;345.52;117.31;	4.81734	5.04344	4.38815	4.77849	0.189086	0.0799793	0.171729	0.160165	0.302796	0.13142	0.883853	1.68307	0.372233	0.914428
240	48.1343	219.846				2.19845673E8;2.21842697E8;2.55822159E8;2.57819214E8;	999.0;617.16;566.07;541.75;	4.08643	3.81951	4.29211	4.26193	0.188066	0.114147	0.120983	0.145298	0.259629	0.384578	0.502897	0.540858	1.60577	1.49795
241	48.154	921.508				9.21507629E8;8.76505127E8;7.8841687E8;9.22511292E8;8.21419128E8;7.5740271E8;	999.0;895.65;617.16;502.63;502.21;484.37;	4.42737	4.67627	4.03557	4.20644	0.17064	0.0710085	0.231761	0.222198	0.214994	0.210502	0.447879	1.77377	0.405691	0.60127
242	48.154	490.13				4.90130463E8;4.92127411E8;4.94124512E8;	999.0;902.29;236.99;	5.30262	4.85855	5.25168	5.31821	0.0757291	0.34273	0.0710528	0.0651426	0.241417	0.636932	0.88414	0.359692	0.889329	1.03656
244	48.2335	891.497				8.91496826E8;8.92500183E8;1.063571167E9;	999.0;489.21;205.84;	4.43478	4.7345	4.10119	4.5332	0.245759	0.0704298	0.217883	0.103233	0.274772	0.339496	0.746841	1.99398	0.463877	1.25433
245	48.2544	575.308				5.75308228E8;5.76311584E8;	999.0;250.12;	4.36992	4.41096	4.61685	4.44543	0.098443	0.0842375	0.0373239	0.0463776	0.759562	0.0470139	0.545313	1.0991	1.76576	1.1899
246	48.2544	596.321				5.9632135E8;5.08268921E8;	999.0;612.93;	3.68192	3.62446	3.96184	4.03368	0.0754361	0.0808388	0.157915	0.16582	0.617346	0.148386	0.0757875	0.876068	1.9051	2.24783
247	48.3145	693.335				6.93335022E8;6.94338196E8;	999.0;342.83;	4.88126	4.90916	4.83418	4.90723	0.0372372	0.0248751	0.0656686	0.0141072	0.550638	0.550255	0.573536	1.06635	0.897271	1.06164
249	48.334	991.513	991.513	Furostane-3,14,17,22,26-pentol, 22-Me ether, 26-Ac, 3-O-[?-L-rhamnopyranosyl-(1?2)[?-D-glucopyranosyl-(1?4)]-?-D-glucopyranoside]	4	9.91513184E8;9.03533203E8;9.92516296E8;1.079602295E9;9.04536804E8;9.49538879E8;	999.0;718.52;521.04;427.46;377.56;145.41;	4.60913	4.74547	4.26515	4.37505	0.0941224	0.0594699	0.161101	0.102922	0.255568	0.102484	0.13812	1.3688	0.452924	0.583339
250	48.354	591.303				5.91303101E8;5.92306335E8;5.45297607E8;5.81274292E8;	999.0;302.9;176.76;62.23;	4.56472	4.67723	5.06891	4.90756	0.285181	0.178083	0.116543	0.136709	0.746491	0.140352	0.353371	1.29574	3.19296	2.20211
251	48.3935	817.424				8.17423767E8;8.15444153E8;1.008511353E9;1.095597168E9;	999.0;253.21;200.64;157.71;	4.79221	4.98755	4.56226	4.73753	0.139024	0.0615892	0.182966	0.119969	0.234857	0.346289	0.781401	1.56798	0.588918	0.881694
252	48.4136	773.449				7.7344928E8;8.19454468E8;7.74452637E8;8.20457825E8;	999.0;667.09;416.07;378.02;	4.78007	4.74075	4.62255	4.80176	0.0454605	0.0725068	0.117413	0.0356459	0.65813	0.246251	0.729636	0.913439	0.695793	1.05123
253	48.4529	873.413	873.413	3,14,16-Trihydroxycard-2(22)-enolide, 3-O-[?-D-Glucopyranosyl-(1?4)-?-D-glucopyranosyl-(1?4)-6-deoxy-3-O-methyl-?-D-galactopyranoside]	4	8.73413391E8;8.74416931E8;8.75419312E8;8.6338501E8;6.85345398E8;	999.0;467.99;132.89;40.83;36.45;	5.16919	5.15958	4.43735	4.50109	0.0198034	0.0530285	0.462939	0.419921	0.869305	0.152893	0.113528	0.978098	0.185419	0.214731
254	48.5507	476.109	476.109	8-(Methylthio)octyl glucosinolate	2	4.76109497E8;4.77113129E8;	999.0;140.28;	4.39782	4.79018	4.46403	4.23638	0.0778755	0.0938094	0.0754754	0.0322041	0.0122724	0.558474	0.125215	2.46812	1.16468	0.689549
255	48.5507	811.486				8.11485718E8;8.12489136E8;8.47461914E8;	999.0;465.68;152.21;	4.41621	4.27933	4.02667	4.32289	0.271991	0.209378	0.324626	0.210934	0.700498	0.384579	0.802813	0.729668	0.407812	0.80665
256	48.6494	683.33	637.32	dn-oPDA–DGMG derivative	3	6.83329651E8;6.84332642E8;6.85335449E8;6.73300781E8;7.00319519E8;	999.0;370.28;84.41;49.79;17.7;	5.44552	5.48631	5.27569	5.18878	0.0361555	0.0331517	0.212173	0.180257	0.429779	0.452808	0.160435	1.09848	0.676337	0.553679
257	48.6688	1017.56				1.01756488E9;1.018568298E9;1.063570679E9;1.019571289E9;1.064573975E9;	999.0;539.66;238.4;165.43;126.03;	4.61655	4.77456	4.91873	4.86633	0.283554	0.118948	0.0641639	0.0552011	0.621237	0.329012	0.467503	1.43883	2.00529	1.77736
258	48.728	293.176				2.93176147E8;2.94179535E8;	999.0;178.78;	5.21179	5.11206	5.13259	5.15828	0.0788237	0.0335434	0.0328651	0.0418971	0.277871	0.380867	0.597059	0.794816	0.833303	0.884071
259	48.748	1033.56				1.033559814E9;1.034563477E9;1.035566162E9;	999.0;552.93;170.51;	4.71644	4.89665	4.97213	5.05274	0.310183	0.149531	0.0749411	0.0343129	0.61492	0.446111	0.372472	1.51429	1.80176	2.16923
260	48.8496	715.356	715.356	Lyciumoside IX	4	7.15355652E8;8.04411621E8;7.16359375E8;1.061555542E9;	999.0;412.39;370.94;224.82;	4.59956	4.62158	4.14547	4.62377	0.055526	0.0795309	0.134675	0.0819926	0.826117	0.0142888	0.807492	1.05201	0.351486	1.05732
261	48.9103	931.455				9.31455322E8;9.32458801E8;8.85449707E8;	999.0;471.16;279.0;	4.38333	4.37586	4.55856	4.66009	0.233443	0.161375	0.0608697	0.0425609	0.979641	0.488315	0.334968	0.982943	1.49705	1.8913

## Sheet: Supplemental table 8
Supplemental table 8. A list of gene probes showing correlation with metabolite-associated QTLepi peak markers. PROBE_ID, probe id; GENE_ID, gene id where the probe is mapping; ANNOTATION, annotation where the probe maps, namely gene promoters (GENE_PROM); QTL_CHROMOSOME, chromosome where the metabolite-associated QTLepi is located; RHO, correlation score determined between the methylation signal…
PROBE_ID	GENE_ID	ANNOTATION	QTL_CHROMOSOME	RHO	MARKER_ID
CHR01FS005098342	AT1G14790	GENE_PROM	1	0.458768	MM5
CHR01FS005098342	AT1G14800	GENE_PROM	1	0.458768	MM5
CHR01FS005098342	AT1G14790	GENE_PROM	1	0.421729	MM10
CHR01FS005098342	AT1G14800	GENE_PROM	1	0.421729	MM10
CHR01FS005098853	AT1G14790	GENE_PROM	1	0.337974	MM25
CHR01FS005098853	AT1G14800	GENE_PROM	1	0.337974	MM25
CHR01FS005098853	AT1G14790	GENE_PROM	1	0.337974	MM25
CHR01FS005098853	AT1G14800	GENE_PROM	1	0.337974	MM25
CHR01FS005098853	AT1G14790	GENE_PROM	1	0.460983	MM91
CHR01FS005098853	AT1G14800	GENE_PROM	1	0.460983	MM91
CHR01FS005098853	AT1G14790	GENE_PROM	1	0.47288	MM123
CHR01FS005098853	AT1G14800	GENE_PROM	1	0.47288	MM123
CHR01FS005098853	AT1G14790	GENE_PROM	1	0.47288	MM123
CHR01FS005098853	AT1G14800	GENE_PROM	1	0.47288	MM123
CHR01FS005893849	AT1G17235	GENE_PROM	1	0.413883	MM5
CHR01FS005893849	AT1G17235	GENE_PROM	1	0.314535	MM10
CHR01FS006156483	AT1G17890	GENE_PROM	4	0.30132	MM587
CHR01FS006157012	AT1G17890	GENE_PROM	1	0.796171	MM123
CHR01FS006157012	AT1G17890	GENE_PROM	1	0.796171	MM123
CHR01FS006157202	AT1G17890	GENE_PROM	1	0.696507	MM91
CHR01FS006157202	AT1G17890	GENE_PROM	4	0.37286	MM654
CHR01FS006157202	AT1G17890	GENE_PROM	4	0.37286	MM654
CHR01FS006157202	AT1G17890	GENE_PROM	4	0.37286	MM654
CHR01FS006157202	AT1G17890	GENE_PROM	4	0.37286	MM654
CHR01FS006157807	AT1G17910	GENE_PROM	1	0.71412	MM91
CHR01FS006158359	AT1G17910	GENE_PROM	4	0.343326	MM654
CHR01FS006158359	AT1G17910	GENE_PROM	4	0.343326	MM654
CHR01FS006158359	AT1G17910	GENE_PROM	4	0.343326	MM654
CHR01FS006158359	AT1G17910	GENE_PROM	4	0.343326	MM654
CHR01FS006158689	AT1G17910	GENE_PROM	2	0.343487	MM168
CHR01FS006158689	AT1G17910	GENE_PROM	2	0.358367	MM240
CHR01FS006158689	AT1G17910	GENE_PROM	2	0.343537	MM330
CHR01FS006158964	AT1G17910	GENE_PROM	1	0.79322	MM123
CHR01FS006158964	AT1G17910	GENE_PROM	1	0.79322	MM123
CHR01FS006158964	AT1G17910	GENE_PROM	4	0.319793	MM587
CHR01FS006302857	AT1G18320	GENE_PROM	5	0.51785	MM823
CHR01FS006302857	AT1G18320	GENE_PROM	5	0.56534	MM854
CHR01FS006303012	AT1G18320	GENE_PROM	1	0.326613	MM91
CHR01FS006303012	AT1G18320	GENE_PROM	5	0.540725	MM865
CHR01FS006303012	AT1G18320	GENE_PROM	5	0.712639	MM859
CHR01FS006303012	AT1G18320	GENE_PROM	5	0.681402	MM862
CHR01FS006303012	AT1G18320	GENE_PROM	5	0.681402	MM862
CHR01FS006303012	AT1G18320	GENE_PROM	5	0.681402	MM862
CHR01FS008461252	AT1G23935	GENE_PROM	1	0.470544	MM91
CHR01FS008461252	AT1G23935	GENE_PROM	1	0.462055	MM123
CHR01FS008461252	AT1G23935	GENE_PROM	1	0.462055	MM123
CHR01FS008461755	AT1G15310	GENE_PROM	1	0.480007	MM1
CHR01FS008649020	AT1G15780	GENE_PROM	1	0.451611	MM1
CHR01FS008649020	AT1G24388	GENE_PROM	1	0.376436	MM91
CHR01FS008649020	AT1G24388	GENE_PROM	1	0.361672	MM123
CHR01FS008649020	AT1G24388	GENE_PROM	1	0.361672	MM123
CHR01FS008816171	AT1G25141	GENE_PROM	1	0.450917	MM91
CHR01FS008816631	AT1G16240	GENE_PROM	1	0.581038	MM1
CHR01FS008816837	AT1G25141	GENE_PROM	1	0.450737	MM123
CHR01FS008816837	AT1G25141	GENE_PROM	1	0.450737	MM123
CHR01FS009004728	AT1G25682	GENE_PROM	1	0.65222	MM91
CHR01FS009004728	AT1G25682	GENE_PROM	1	0.725805	MM123
CHR01FS009004728	AT1G25682	GENE_PROM	1	0.725805	MM123
CHR01FS009004728	AT1G25682	GENE_PROM	4	0.335942	MM654
CHR01FS009004728	AT1G25682	GENE_PROM	4	0.335942	MM654
CHR01FS009004728	AT1G25682	GENE_PROM	4	0.335942	MM654
CHR01FS009004728	AT1G25682	GENE_PROM	4	0.335942	MM654
CHR01FS009004885	AT1G25682	GENE_PROM	2	0.318367	MM168
CHR01FS009004885	AT1G25682	GENE_PROM	2	0.35332	MM240
CHR01FS009018095	AT1G25988	GENE_PROM	1	0.391689	MM123
CHR01FS009018095	AT1G25988	GENE_PROM	1	0.391689	MM123
CHR01FS009106204	AT1G16970	GENE_PROM	1	0.3555	MM1
CHR01FS009106204	AT1G26330	GENE_PROM	1	0.460479	MM91
CHR01FS009106204	AT1G26330	GENE_PROM	1	0.420721	MM123
CHR01FS009106204	AT1G26330	GENE_PROM	1	0.420721	MM123
CHR01FS009373003	AT1G17710	GENE_PROM	1	0.38448	MM1
CHR01FS009373003	AT1G27000	GENE_PROM	1	0.5788	MM91
CHR01FS009373003	AT1G27000	GENE_PROM	1	0.54822	MM123
CHR01FS009373003	AT1G27000	GENE_PROM	1	0.54822	MM123
CHR01FS009464911	AT1G17960	GENE_PROM	1	0.453264	MM1
CHR01FS009464911	AT1G27240	GENE_PROM	1	0.551586	MM91
CHR01FS009464911	AT1G27240	GENE_PROM	1	0.533914	MM123
CHR01FS009464911	AT1G27240	GENE_PROM	1	0.533914	MM123
CHR01FS009465256	AT1G27240	GENE_PROM	5	0.365364	MM823
CHR01FS009574294	AT1G18330	GENE_PROM	1	0.466629	MM1
CHR01FS009574294	AT1G18335	GENE_PROM	1	0.466629	MM1
CHR01FS009574686	AT1G27570	GENE_PROM	1	0.69701	MM91
CHR01FS009574686	AT1G27570	GENE_PROM	1	0.664788	MM123
CHR01FS009574686	AT1G27570	GENE_PROM	1	0.664788	MM123
CHR01FS009676596	AT1G27770	GENE_PROM	1	0.655743	MM91
CHR01FS009676596	AT1G27770	GENE_PROM	1	0.700217	MM123
CHR01FS009676596	AT1G27770	GENE_PROM	1	0.700217	MM123
CHR01FS009676800	AT1G27770	GENE_PROM	2	0.354408	MM168
CHR01FS009676800	AT1G27770	GENE_PROM	2	0.343786	MM240
CHR01FS009676800	AT1G27770	GENE_PROM	2	0.33358	MM330
CHR01FS009676800	AT1G27770	GENE_PROM	4	0.359147	MM654
CHR01FS009676800	AT1G27770	GENE_PROM	4	0.359147	MM654
CHR01FS009676800	AT1G27770	GENE_PROM	4	0.359147	MM654
CHR01FS009676800	AT1G27770	GENE_PROM	4	0.359147	MM654
CHR01FS009677314	AT1G27770	GENE_PROM	4	0.318045	MM587
CHR01FS009677314	AT1G27770	GENE_PROM	5	0.360331	MM823
CHR01FS009677479	AT1G18520	GENE_PROM	1	0.325466	MM1
CHR01FS009690290	AT1G18530	GENE_PROM	1	0.345671	MM1
CHR01FS009690983	AT1G27820	GENE_PROM	2	0.369699	MM168
CHR01FS009690983	AT1G27820	GENE_PROM	2	0.373509	MM240
CHR01FS009690983	AT1G27820	GENE_PROM	2	0.370644	MM330
CHR01FS009690983	AT1G27820	GENE_PROM	5	0.346743	MM823
CHR01FS009691118	AT1G27820	GENE_PROM	4	0.337018	MM587
CHR01FS009691118	AT1G27820	GENE_PROM	4	0.327504	MM654
CHR01FS009691118	AT1G27820	GENE_PROM	4	0.327504	MM654
CHR01FS009691118	AT1G27820	GENE_PROM	4	0.327504	MM654
CHR01FS009691118	AT1G27820	GENE_PROM	4	0.327504	MM654
CHR01FS009691308	AT1G27820	GENE_PROM	1	0.712107	MM91
CHR01FS009691308	AT1G27820	GENE_PROM	1	0.802076	MM123
CHR01FS009691308	AT1G27820	GENE_PROM	1	0.802076	MM123
CHR01FS010152819	AT1G29071	GENE_PROM	1	0.680905	MM91
CHR01FS010152819	AT1G29071	GENE_PROM	1	0.772552	MM123
CHR01FS010152819	AT1G29071	GENE_PROM	1	0.772552	MM123
CHR01FS010152969	AT1G29071	GENE_PROM	4	0.337518	MM587
CHR01FS010152969	AT1G29071	GENE_PROM	4	0.40292	MM654
CHR01FS010152969	AT1G29071	GENE_PROM	4	0.40292	MM654
CHR01FS010152969	AT1G29071	GENE_PROM	4	0.40292	MM654
CHR01FS010152969	AT1G29071	GENE_PROM	4	0.40292	MM654
CHR01FS010152969	AT1G29071	GENE_PROM	4	0.374958	MM666
CHR01FS010357715	AT1G29640	GENE_PROM	1	0.573712	MM91
CHR01FS010357900	AT1G20380	GENE_PROM	1	0.342673	MM1
CHR01FS010357900	AT1G29640	GENE_PROM	1	0.564662	MM123
CHR01FS010357900	AT1G29640	GENE_PROM	1	0.564662	MM123
CHR01FS011044774	AT1G21840	GENE_PROM	1	0.347861	MM1
CHR01FS011044774	AT1G30970	GENE_PROM	1	0.686204	MM123
CHR01FS011044774	AT1G30970	GENE_PROM	1	0.686204	MM123
CHR01FS011045145	AT1G30970	GENE_PROM	1	0.660775	MM91
CHR01FS011045616	AT1G30974	GENE_PROM	1	0.684931	MM91
CHR01FS011045616	AT1G30974	GENE_PROM	1	0.6889	MM123
CHR01FS011045616	AT1G30974	GENE_PROM	1	0.6889	MM123
CHR01FS011050760	AT1G30990	GENE_PROM	1	0.680905	MM91
CHR01FS011050760	AT1G30990	GENE_PROM	2	0.322516	MM330
CHR01FS011051102	AT1G30990	GENE_PROM	2	0.33986	MM240
CHR01FS011051102	AT1G30990	GENE_PROM	4	0.32903	MM587
CHR01FS011051102	AT1G30990	GENE_PROM	4	0.331723	MM654
CHR01FS011051102	AT1G30990	GENE_PROM	4	0.331723	MM654
CHR01FS011051102	AT1G30990	GENE_PROM	4	0.331723	MM654
CHR01FS011051102	AT1G30990	GENE_PROM	4	0.331723	MM654
CHR01FS011051415	AT1G30990	GENE_PROM	1	0.784854	MM123
CHR01FS011051415	AT1G30990	GENE_PROM	1	0.784854	MM123
CHR01FS011102716	AT1G31110	GENE_PROM	1	0.547543	MM91
CHR01FS011102716	AT1G31110	GENE_PROM	1	0.580644	MM123
CHR01FS011102716	AT1G31110	GENE_PROM	1	0.580644	MM123
CHR01FS011148276	AT1G31200	GENE_PROM	1	0.497217	MM91
CHR01FS011148276	AT1G31200	GENE_PROM	1	0.553088	MM123
CHR01FS011148276	AT1G31200	GENE_PROM	1	0.553088	MM123
CHR01FS011309661	AT1G22410	GENE_PROM	1	0.348401	MM1
CHR01FS011309661	AT1G31580	GENE_PROM	1	0.648194	MM91
CHR01FS011309661	AT1G31580	GENE_PROM	1	0.66282	MM123
CHR01FS011309661	AT1G31580	GENE_PROM	1	0.66282	MM123
CHR01FS011512261	AT1G22860	GENE_PROM	1	0.375434	MM1
CHR01FS011752352	AT1G32500	GENE_PROM	2	0.351637	MM240
CHR01FS011752352	AT1G32500	GENE_PROM	2	0.329707	MM330
CHR01FS011752352	AT1G32500	GENE_PROM	5	0.338691	MM823
CHR01FS011753174	AT1G32500	GENE_PROM	1	0.709591	MM91
CHR01FS011753314	AT1G32500	GENE_PROM	1	0.791743	MM123
CHR01FS011753314	AT1G32500	GENE_PROM	1	0.791743	MM123
CHR01FS011753314	AT1G32500	GENE_PROM	4	0.362981	MM587
CHR01FS011753314	AT1G32500	GENE_PROM	4	0.339106	MM654
CHR01FS011753314	AT1G32500	GENE_PROM	4	0.339106	MM654
CHR01FS011753314	AT1G32500	GENE_PROM	4	0.339106	MM654
CHR01FS011753314	AT1G32500	GENE_PROM	4	0.339106	MM654
CHR01FS011789416	AT1G32585	GENE_PROM	1	0.58428	MM91
CHR01FS011789416	AT1G32585	GENE_PROM	1	0.571787	MM123
CHR01FS011789416	AT1G32585	GENE_PROM	1	0.571787	MM123
CHR01FS011789966	AT1G32585	GENE_PROM	5	0.446891	MM823
CHR01FS011790456	AT1G32585	GENE_PROM	5	0.439483	MM854
CHR01FS011790631	AT1G32585	GENE_PROM	5	0.495913	MM865
CHR01FS011790631	AT1G32585	GENE_PROM	5	0.526971	MM859
CHR01FS011790631	AT1G32585	GENE_PROM	5	0.496891	MM862
CHR01FS011790631	AT1G32585	GENE_PROM	5	0.496891	MM862
CHR01FS011790631	AT1G32585	GENE_PROM	5	0.496891	MM862
CHR01FS011793426	AT1G32600	GENE_PROM	5	0.443872	MM823
CHR01FS011793426	AT1G32600	GENE_PROM	5	0.432886	MM854
CHR01FS011793606	AT1G32600	GENE_PROM	1	0.450917	MM91
CHR01FS011793606	AT1G32600	GENE_PROM	1	0.400546	MM123
CHR01FS011793606	AT1G32600	GENE_PROM	1	0.400546	MM123
CHR01FS011793875	AT1G32600	GENE_PROM	5	0.500096	MM865
CHR01FS011793875	AT1G32600	GENE_PROM	5	0.519325	MM859
CHR01FS011794100	AT1G32600	GENE_PROM	5	0.49633	MM862
CHR01FS011794100	AT1G32600	GENE_PROM	5	0.49633	MM862
CHR01FS011794100	AT1G32600	GENE_PROM	5	0.49633	MM862
CHR01FS011984824	AT1G23940	GENE_PROM	1	0.416116	MM1
CHR01FS011984824	AT1G33080	GENE_PROM	1	0.647691	MM91
CHR01FS011984824	AT1G33080	GENE_PROM	1	0.652978	MM123
CHR01FS011984824	AT1G33080	GENE_PROM	1	0.652978	MM123
CHR01FS012176723	AT1G24270	GENE_PROM	1	0.363146	MM1
CHR01FS012176723	AT1G33590	GENE_PROM	1	0.662788	MM91
CHR01FS012176723	AT1G33590	GENE_PROM	1	0.672169	MM123
CHR01FS012176723	AT1G33590	GENE_PROM	1	0.672169	MM123
CHR01FS012176848	AT1G33590	GENE_PROM	5	0.483629	MM823
CHR01FS012176848	AT1G33590	GENE_PROM	5	0.410049	MM854
CHR01FS012176848	AT1G33590	GENE_PROM	5	0.342394	MM859
CHR01FS012176848	AT1G33590	GENE_PROM	5	0.362854	MM862
CHR01FS012176848	AT1G33590	GENE_PROM	5	0.362854	MM862
CHR01FS012176848	AT1G33590	GENE_PROM	5	0.362854	MM862
CHR01FS012591046	AT1G34430	GENE_PROM	4	0.348253	MM587
CHR01FS012591046	AT1G34430	GENE_PROM	4	0.383671	MM654
CHR01FS012591046	AT1G34430	GENE_PROM	4	0.383671	MM654
CHR01FS012591046	AT1G34430	GENE_PROM	4	0.383671	MM654
CHR01FS012591046	AT1G34430	GENE_PROM	4	0.383671	MM654
CHR01FS012591317	AT1G25420	GENE_PROM	1	0.338572	MM1
CHR01FS012691497	AT1G34650	GENE_PROM	2	0.312906	MM168
CHR01FS012691497	AT1G34650	GENE_PROM	5	0.380001	MM865
CHR01FS012691647	AT1G34650	GENE_PROM	5	0.302285	MM862
CHR01FS012691647	AT1G34650	GENE_PROM	5	0.302285	MM862
CHR01FS012691647	AT1G34650	GENE_PROM	5	0.302285	MM862
CHR01FS013007284	AT1G26520	GENE_PROM	1	0.400279	MM1
CHR01FS013022691	AT1G35410	GENE_PROM	4	0.323783	MM666
CHR01FS013022821	AT1G35410	GENE_PROM	4	0.390263	MM654
CHR01FS013022821	AT1G35410	GENE_PROM	4	0.390263	MM654
CHR01FS013022821	AT1G35410	GENE_PROM	4	0.390263	MM654
CHR01FS013022821	AT1G35410	GENE_PROM	4	0.390263	MM654
CHR01FS013023341	AT1G35410	GENE_PROM	4	0.366976	MM587
CHR01FS013330577	AT1G26820	GENE_PROM	1	0.341848	MM1
CHR01FS013331362	AT1G35850	GENE_PROM	4	0.295079	MM587
CHR01FS013331362	AT1G35850	GENE_PROM	4	0.359675	MM654
CHR01FS013331362	AT1G35850	GENE_PROM	4	0.359675	MM654
CHR01FS013331362	AT1G35850	GENE_PROM	4	0.359675	MM654
CHR01FS013331362	AT1G35850	GENE_PROM	4	0.359675	MM654
CHR01FS013336137	AT1G26830	GENE_PROM	1	0.378982	MM1
CHR01FS013336137	AT1G35860	GENE_PROM	4	0.320043	MM587
CHR01FS013336137	AT1G35860	GENE_PROM	4	0.335415	MM654
CHR01FS013336137	AT1G35860	GENE_PROM	4	0.335415	MM654
CHR01FS013336137	AT1G35860	GENE_PROM	4	0.335415	MM654
CHR01FS013336137	AT1G35860	GENE_PROM	4	0.335415	MM654
CHR01FS013436129	AT1G26900	GENE_PROM	1	0.334749	MM1
CHR01FS013483977	AT1G36078	GENE_PROM	4	0.589657	MM587
CHR01FS013483977	AT1G36078	GENE_PROM	4	0.57801	MM654
CHR01FS013483977	AT1G36078	GENE_PROM	4	0.57801	MM654
CHR01FS013483977	AT1G36078	GENE_PROM	4	0.57801	MM654
CHR01FS013483977	AT1G36078	GENE_PROM	4	0.57801	MM654
CHR01FS013483977	AT1G36078	GENE_PROM	4	0.56785	MM666
CHR01FS013483977	AT1G36078	GENE_PROM	4	0.339956	MM686
CHR01FS013483977	AT1G36078	GENE_PROM	4	0.339956	MM686
CHR01FS013483977	AT1G36078	GENE_PROM	4	0.339956	MM686
CHR01FS013483977	AT1G36078	GENE_PROM	4	0.339956	MM686
CHR01FS013484141	AT1G36078	GENE_PROM	4	0.553048	MM665
CHR01FS013484467	AT1G36078	GENE_PROM	2	0.36005	MM240
CHR01FS013484627	AT1G36078	GENE_PROM	2	0.360415	MM168
CHR01FS013484627	AT1G36078	GENE_PROM	2	0.349069	MM330
CHR01FS013615475	AT1G26975	GENE_PROM	1	0.326558	MM1
CHR01FS013615475	AT1G26985	GENE_PROM	1	0.326558	MM1
CHR01FS013762506	AT1G36510	GENE_PROM	4	-0.302293	MM686
CHR01FS013762506	AT1G36510	GENE_PROM	4	-0.302293	MM686
CHR01FS013762506	AT1G36510	GENE_PROM	4	-0.302293	MM686
CHR01FS013762506	AT1G36510	GENE_PROM	4	-0.302293	MM686
CHR01FS013983812	AT1G36920	GENE_PROM	4	0.288232	MM654
CHR01FS013983812	AT1G36920	GENE_PROM	4	0.288232	MM654
CHR01FS014188406	AT1G37162	GENE_PROM	4	0.403974	MM654
CHR01FS014188406	AT1G37162	GENE_PROM	4	0.403974	MM654
CHR01FS014188406	AT1G37162	GENE_PROM	4	0.403974	MM654
CHR01FS014188406	AT1G37162	GENE_PROM	4	0.403974	MM654
CHR01FS014188557	AT1G37162	GENE_PROM	4	0.485806	MM587
CHR01FS014188557	AT1G37162	GENE_PROM	4	0.411317	MM665
CHR01FS014188557	AT1G37162	GENE_PROM	4	0.438435	MM666
CHR02FS000248694	AT2G01554	GENE_PROM	1	0.289626	MM91
CHR02FS000249039	AT2G01554	GENE_PROM	2	0.504475	MM382
CHR02FS000532479	AT2G02103	GENE_PROM	1	0.37299	MM123
CHR02FS000532479	AT2G02103	GENE_PROM	1	0.37299	MM123
CHR02FS000532674	AT2G02103	GENE_PROM	1	0.314196	MM5
CHR02FS000532674	AT2G02103	GENE_PROM	2	0.313792	MM382
CHR02FS000536919	AT2G02120	GENE_PROM	2	0.400283	MM382
CHR02FS000602091	AT2G02280	GENE_PROM	2	0.304827	MM382
CHR02FS000678648	AT2G02520	GENE_PROM	2	0.317484	MM382
CHR02FS000904535	AT2G03070	GENE_PROM	4	0.335021	MM587
CHR02FS000904535	AT2G03070	GENE_PROM	4	0.335942	MM654
CHR02FS000904535	AT2G03070	GENE_PROM	4	0.335942	MM654
CHR02FS000904535	AT2G03070	GENE_PROM	4	0.335942	MM654
CHR02FS000904535	AT2G03070	GENE_PROM	4	0.335942	MM654
CHR02FS000904535	AT2G03070	GENE_PROM	5	0.301724	MM862
CHR02FS000904535	AT2G03070	GENE_PROM	5	0.301724	MM862
CHR02FS000904535	AT2G03070	GENE_PROM	5	0.301724	MM862
CHR02FS000905081	AT2G03070	GENE_PROM	1	0.381524	MM5
CHR02FS000905081	AT2G03070	GENE_PROM	1	0.527412	MM10
CHR02FS000905251	AT2G03070	GENE_PROM	1	0.34103	MM1
CHR02FS000905251	AT2G03070	GENE_PROM	1	0.652905	MM25
CHR02FS000905251	AT2G03070	GENE_PROM	1	0.652905	MM25
CHR02FS000905251	AT2G03070	GENE_PROM	1	0.615231	MM91
CHR02FS000905251	AT2G03070	GENE_PROM	1	0.595653	MM123
CHR02FS000905251	AT2G03070	GENE_PROM	1	0.595653	MM123
CHR02FS001196443	AT2G03913	GENE_PROM	1	0.397572	MM10
CHR02FS001196443	AT2G03913	GENE_PROM	1	0.40153	MM123
CHR02FS001196443	AT2G03913	GENE_PROM	1	0.40153	MM123
CHR02FS001196748	AT2G03913	GENE_PROM	1	0.418255	MM25
CHR02FS001196748	AT2G03913	GENE_PROM	1	0.418255	MM25
CHR02FS001196748	AT2G03913	GENE_PROM	1	0.420219	MM91
CHR02FS001219685	AT2G03936	GENE_PROM	2	0.386571	MM382
CHR02FS001305333	AT2G04031	GENE_PROM	4	-0.345506	MM587
CHR02FS001305538	AT2G04031	GENE_PROM	4	-0.329549	MM686
CHR02FS001305538	AT2G04031	GENE_PROM	4	-0.329549	MM686
CHR02FS001305538	AT2G04031	GENE_PROM	4	-0.329549	MM686
CHR02FS001305538	AT2G04031	GENE_PROM	4	-0.329549	MM686
CHR02FS001345916	AT2G04060	GENE_PROM	2	0.306409	MM382
CHR02FS001512106	AT2G04340	GENE_PROM	2	0.559025	MM382
CHR02FS001740813	AT2G04940	GENE_PROM	1	0.359283	MM25
CHR02FS001740813	AT2G04940	GENE_PROM	1	0.359283	MM25
CHR02FS001740813	AT2G04940	GENE_PROM	1	0.372006	MM123
CHR02FS001740813	AT2G04940	GENE_PROM	1	0.372006	MM123
CHR02FS001740813	AT2G04940	GENE_PROM	4	0.664051	MM587
CHR02FS001740813	AT2G04940	GENE_PROM	4	0.653426	MM654
CHR02FS001740813	AT2G04940	GENE_PROM	4	0.653426	MM654
CHR02FS001740813	AT2G04940	GENE_PROM	4	0.653426	MM654
CHR02FS001740813	AT2G04940	GENE_PROM	4	0.653426	MM654
CHR02FS001740813	AT2G04940	GENE_PROM	4	0.713115	MM665
CHR02FS001740813	AT2G04940	GENE_PROM	4	0.735646	MM666
CHR02FS001740928	AT2G04940	GENE_PROM	4	0.486643	MM686
CHR02FS001740928	AT2G04940	GENE_PROM	4	0.486643	MM686
CHR02FS001740928	AT2G04940	GENE_PROM	4	0.486643	MM686
CHR02FS001740928	AT2G04940	GENE_PROM	4	0.486643	MM686
CHR02FS001973571	AT2G05400	GENE_PROM	1	0.411864	MM123
CHR02FS001973571	AT2G05400	GENE_PROM	1	0.411864	MM123
CHR02FS001974426	AT2G05400	GENE_PROM	1	0.293843	MM5
CHR02FS001974556	AT2G05400	GENE_PROM	1	0.328817	MM25
CHR02FS001974556	AT2G05400	GENE_PROM	1	0.328817	MM25
CHR02FS001974556	AT2G05400	GENE_PROM	1	0.360595	MM91
CHR02FS001974556	AT2G05400	GENE_PROM	2	0.454882	MM382
CHR02FS002024911	AT2G05520	GENE_PROM	1	0.331532	MM25
CHR02FS002024911	AT2G05520	GENE_PROM	1	0.331532	MM25
CHR02FS002024911	AT2G05520	GENE_PROM	1	0.383482	MM91
CHR02FS002024911	AT2G05520	GENE_PROM	1	0.393658	MM123
CHR02FS002024911	AT2G05520	GENE_PROM	1	0.393658	MM123
CHR02FS002024911	AT2G05520	GENE_PROM	2	0.286369	MM382
CHR02FS002024911	AT2G05520	GENE_PROM	4	0.325395	MM654
CHR02FS002024911	AT2G05520	GENE_PROM	4	0.325395	MM654
CHR02FS002024911	AT2G05520	GENE_PROM	4	0.325395	MM654
CHR02FS002024911	AT2G05520	GENE_PROM	4	0.325395	MM654
CHR02FS002031667	AT2G05540	GENE_PROM	1	0.423742	MM91
CHR02FS002031667	AT2G05540	GENE_PROM	1	0.426626	MM123
CHR02FS002031667	AT2G05540	GENE_PROM	1	0.426626	MM123
CHR02FS002031871	AT2G05540	GENE_PROM	2	0.391883	MM382
CHR02FS002071268	AT2G05600	GENE_PROM	2	0.338579	MM382
CHR02FS002101640	AT2G05642	GENE_PROM	2	0.482554	MM382
CHR02FS002102460	AT2G05642	GENE_PROM	1	0.289904	MM25
CHR02FS002102460	AT2G05642	GENE_PROM	1	0.289904	MM25
CHR02FS002103604	AT2G05645	GENE_PROM	1	0.390008	MM25
CHR02FS002103604	AT2G05645	GENE_PROM	1	0.390008	MM25
CHR02FS002103604	AT2G05645	GENE_PROM	1	0.356752	MM123
CHR02FS002103604	AT2G05645	GENE_PROM	1	0.356752	MM123
CHR02FS002169457	AT2G05755	GENE_PROM	2	0.449329	MM382
CHR02FS002373362	AT2G06095	GENE_PROM	2	0.367058	MM382
CHR02FS002410511	AT2G06166	GENE_PROM	1	0.282449	MM123
CHR02FS002410511	AT2G06166	GENE_PROM	1	0.282449	MM123
CHR02FS002410511	AT2G06166	GENE_PROM	2	0.419796	MM382
CHR02FS002410656	AT2G06166	GENE_PROM	4	0.366476	MM587
CHR02FS002410881	AT2G06166	GENE_PROM	4	0.392899	MM654
CHR02FS002410881	AT2G06166	GENE_PROM	4	0.392899	MM654
CHR02FS002410881	AT2G06166	GENE_PROM	4	0.392899	MM654
CHR02FS002410881	AT2G06166	GENE_PROM	4	0.392899	MM654
CHR02FS002410881	AT2G06166	GENE_PROM	4	0.344416	MM665
CHR02FS002410881	AT2G06166	GENE_PROM	4	0.368561	MM666
CHR02FS002626145	AT2G06570	GENE_PROM	1	0.349867	MM25
CHR02FS002626145	AT2G06570	GENE_PROM	1	0.349867	MM25
CHR02FS002626310	AT2G06570	GENE_PROM	1	0.330897	MM5
CHR02FS002626310	AT2G06570	GENE_PROM	1	0.329633	MM91
CHR02FS002626310	AT2G06570	GENE_PROM	1	0.352815	MM123
CHR02FS002626310	AT2G06570	GENE_PROM	1	0.352815	MM123
CHR02FS002626310	AT2G06570	GENE_PROM	2	0.407666	MM382
CHR02FS002626310	AT2G06570	GENE_PROM	4	0.303566	MM587
CHR02FS002649962	AT2G06645	GENE_PROM	1	0.304019	MM5
CHR02FS002650582	AT2G06645	GENE_PROM	1	0.381586	MM25
CHR02FS002650582	AT2G06645	GENE_PROM	1	0.381586	MM25
CHR02FS002650582	AT2G06645	GENE_PROM	2	0.439576	MM382
CHR02FS002650787	AT2G06645	GENE_PROM	1	0.334181	MM10
CHR02FS002660802	AT2G06667	GENE_PROM	1	0.328627	MM10
CHR02FS002660802	AT2G06667	GENE_PROM	2	0.417951	MM382
CHR02FS002661017	AT2G06667	GENE_PROM	1	0.298824	MM25
CHR02FS002661017	AT2G06667	GENE_PROM	1	0.298824	MM25
CHR02FS002753410	AT2G06845	GENE_PROM	2	0.474644	MM382
CHR02FS002753585	AT2G06845	GENE_PROM	4	0.311555	MM587
CHR02FS002814094	AT2G06908	GENE_PROM	1	0.331646	MM10
CHR02FS002814634	AT2G06908	GENE_PROM	1	0.313196	MM25
CHR02FS002814634	AT2G06908	GENE_PROM	1	0.313196	MM25
CHR02FS002814634	AT2G06908	GENE_PROM	1	0.354796	MM91
CHR02FS002902365	AT2G07000	GENE_PROM	2	0.362839	MM382
CHR02FS003012591	AT2G07240	GENE_PROM	2	0.404502	MM382
CHR02FS003044780	AT2G07340	GENE_PROM	2	0.391845	MM382
CHR02FS003125322	AT2G07505	GENE_PROM	2	0.446165	MM382
CHR02FS003136549	AT2G07521	GENE_PROM	2	0.355455	MM382
CHR02FS003220524	AT2G07640	GENE_PROM	1	0.384443	MM1
CHR02FS003220524	AT2G07640	GENE_PROM	1	0.544885	MM5
CHR02FS003220524	AT2G07640	GENE_PROM	1	0.576731	MM10
CHR02FS003220524	AT2G07640	GENE_PROM	1	0.703699	MM25
CHR02FS003220524	AT2G07640	GENE_PROM	1	0.703699	MM25
CHR02FS003220524	AT2G07640	GENE_PROM	1	0.700029	MM91
CHR02FS003220524	AT2G07640	GENE_PROM	1	0.710059	MM123
CHR02FS003220524	AT2G07640	GENE_PROM	1	0.710059	MM123
CHR02FS003656786	AT2G09388	GENE_PROM	2	0.507869	MM382
CHR02FS003681183	AT2G09795	GENE_PROM	2	0.392899	MM382
CHR02FS003712045	AT2G09838	GENE_PROM	2	0.471479	MM382
CHR02FS004330654	AT2G10965	GENE_PROM	4	0.347503	MM587
CHR02FS004372008	AT2G11015	GENE_PROM	2	0.313265	MM382
CHR02FS004493972	AT2G11271	GENE_PROM	2	0.428234	MM382
CHR02FS004642276	AT2G11570	GENE_PROM	1	0.307249	MM25
CHR02FS004642276	AT2G11570	GENE_PROM	1	0.307249	MM25
CHR02FS004642276	AT2G11570	GENE_PROM	1	0.3246	MM91
CHR02FS004642276	AT2G11570	GENE_PROM	2	0.366003	MM382
CHR02FS004642461	AT2G11570	GENE_PROM	1	0.371514	MM123
CHR02FS004642461	AT2G11570	GENE_PROM	1	0.371514	MM123
CHR02FS004668389	AT2G11626	GENE_PROM	2	0.432453	MM382
CHR02FS004683878	AT2G11651	GENE_PROM	2	0.396591	MM382
CHR02FS004732371	AT2G11773	GENE_PROM	2	0.494684	MM382
CHR02FS004732720	AT2G11773	GENE_PROM	4	0.352818	MM654
CHR02FS004732720	AT2G11773	GENE_PROM	4	0.352818	MM654
CHR02FS004732720	AT2G11773	GENE_PROM	4	0.352818	MM654
CHR02FS004732720	AT2G11773	GENE_PROM	4	0.352818	MM654
CHR02FS004792984	AT2G11851	GENE_PROM	2	0.411358	MM382
CHR02FS004901850	AT2G12190	GENE_PROM	2	0.347017	MM382
CHR02FS005128741	AT2G12557	GENE_PROM	2	0.413467	MM382
CHR02FS005298342	AT2G12880	GENE_PROM	2	0.417159	MM382
CHR02FS005299866	AT2G12875	GENE_PROM	2	0.473333	MM382
CHR02FS005300320	AT2G12900	GENE_PROM	2	0.484664	MM382
CHR02FS005323078	AT2G12940	GENE_PROM	2	0.373386	MM382
CHR02FS005332040	AT2G12945	GENE_PROM	2	0.436672	MM382
CHR02FS005422573	AT2G13125	GENE_PROM	2	0.399758	MM382
CHR02FS005503799	AT2G13272	GENE_PROM	2	0.378133	MM382
CHR02FS005505434	AT2G13273	GENE_PROM	2	0.456713	MM382
CHR02FS005595812	AT2G13430	GENE_PROM	1	0.320071	MM10
CHR02FS005595812	AT2G13430	GENE_PROM	1	0.377619	MM25
CHR02FS005595812	AT2G13430	GENE_PROM	1	0.377619	MM25
CHR02FS005595812	AT2G13430	GENE_PROM	1	0.379958	MM91
CHR02FS005595812	AT2G13430	GENE_PROM	1	0.354291	MM123
CHR02FS005595812	AT2G13430	GENE_PROM	1	0.354291	MM123
CHR02FS005598351	AT2G13431	GENE_PROM	2	0.449857	MM382
CHR02FS005608043	AT2G13450	GENE_PROM	2	0.367585	MM382
CHR02FS005730467	AT2G13720	GENE_PROM	2	0.429816	MM382
CHR02FS005730467	AT2G13720	GENE_PROM	4	0.392938	MM587
CHR02FS005784628	AT2G13820	GENE_PROM	1	0.368699	MM25
CHR02FS005784628	AT2G13820	GENE_PROM	1	0.368699	MM25
CHR02FS005784628	AT2G13820	GENE_PROM	1	0.382475	MM91
CHR02FS005784628	AT2G13820	GENE_PROM	1	0.409403	MM123
CHR02FS005784628	AT2G13820	GENE_PROM	1	0.409403	MM123
CHR02FS005784628	AT2G13820	GENE_PROM	4	0.338516	MM587
CHR02FS005784628	AT2G13820	GENE_PROM	4	0.330141	MM654
CHR02FS005784628	AT2G13820	GENE_PROM	4	0.330141	MM654
CHR02FS005784628	AT2G13820	GENE_PROM	4	0.330141	MM654
CHR02FS005784628	AT2G13820	GENE_PROM	4	0.330141	MM654
CHR02FS005863989	AT2G13950	GENE_PROM	2	0.479918	MM382
CHR02FS006113128	AT2G14378	GENE_PROM	1	0.370681	MM25
CHR02FS006113128	AT2G14378	GENE_PROM	1	0.370681	MM25
CHR02FS006113621	AT2G14378	GENE_PROM	2	0.480445	MM382
CHR02FS006117052	AT2G14390	GENE_PROM	2	0.497894	MM382
CHR02FS006539511	AT2G15080	GENE_PROM	2	0.344908	MM382
CHR02FS006540121	AT2G15080	GENE_PROM	1	0.346556	MM5
CHR02FS006540121	AT2G15080	GENE_PROM	1	0.439846	MM10
CHR02FS006540121	AT2G15080	GENE_PROM	1	0.52728	MM25
CHR02FS006540121	AT2G15080	GENE_PROM	1	0.52728	MM25
CHR02FS006540121	AT2G15080	GENE_PROM	1	0.489669	MM91
CHR02FS006540121	AT2G15080	GENE_PROM	1	0.51766	MM123
CHR02FS006540121	AT2G15080	GENE_PROM	1	0.51766	MM123
CHR02FS006598211	AT2G15180	GENE_PROM	1	0.277528	MM123
CHR02FS006598211	AT2G15180	GENE_PROM	1	0.277528	MM123
CHR02FS006707645	AT2G15370	GENE_PROM	2	0.422446	MM382
CHR02FS006779739	AT2G15530	GENE_PROM	2	0.423307	MM382
CHR02FS006849364	AT2G15710	GENE_PROM	2	0.445377	MM382
CHR02FS006943877	AT2G15910	GENE_PROM	2	0.43272	MM382
CHR02FS006961080	AT2G15980	GENE_PROM	2	0.387626	MM382
CHR02FS006976708	AT2G16015	GENE_PROM	2	0.469897	MM382
CHR02FS007014996	AT2G16145	GENE_PROM	2	0.47939	MM382
CHR02FS007015306	AT2G16145	GENE_PROM	4	0.362839	MM654
CHR02FS007015306	AT2G16145	GENE_PROM	4	0.362839	MM654
CHR02FS007015306	AT2G16145	GENE_PROM	4	0.362839	MM654
CHR02FS007015306	AT2G16145	GENE_PROM	4	0.362839	MM654
CHR02FS007015496	AT2G16145	GENE_PROM	4	0.380956	MM587
CHR02FS007231126	AT2G16668	GENE_PROM	2	0.463569	MM382
CHR02FS007296669	AT2G16810	GENE_PROM	4	0.399228	MM654
CHR02FS007296669	AT2G16810	GENE_PROM	4	0.399228	MM654
CHR02FS007296669	AT2G16810	GENE_PROM	4	0.399228	MM654
CHR02FS007296669	AT2G16810	GENE_PROM	4	0.399228	MM654
CHR02FS007296669	AT2G16810	GENE_PROM	4	0.338545	MM666
CHR02FS007296809	AT2G16810	GENE_PROM	1	0.509295	MM10
CHR02FS007296809	AT2G16810	GENE_PROM	1	0.656125	MM25
CHR02FS007296809	AT2G16810	GENE_PROM	1	0.656125	MM25
CHR02FS007296809	AT2G16810	GENE_PROM	1	0.716637	MM91
CHR02FS007296809	AT2G16810	GENE_PROM	1	0.798632	MM123
CHR02FS007296809	AT2G16810	GENE_PROM	1	0.798632	MM123
CHR02FS007296809	AT2G16810	GENE_PROM	4	0.316548	MM587
CHR02FS007296999	AT2G16810	GENE_PROM	4	0.316169	MM665
CHR02FS007297314	AT2G16810	GENE_PROM	1	0.450939	MM5
CHR02FS007301439	AT2G16835	GENE_PROM	1	0.424843	MM5
CHR02FS007301439	AT2G16835	GENE_PROM	1	0.477087	MM10
CHR02FS007301439	AT2G16835	GENE_PROM	1	0.712107	MM91
CHR02FS007301439	AT2G16835	GENE_PROM	4	0.355455	MM654
CHR02FS007301439	AT2G16835	GENE_PROM	4	0.355455	MM654
CHR02FS007301439	AT2G16835	GENE_PROM	4	0.355455	MM654
CHR02FS007301439	AT2G16835	GENE_PROM	4	0.355455	MM654
CHR02FS007301619	AT2G16835	GENE_PROM	1	0.801092	MM123
CHR02FS007301619	AT2G16835	GENE_PROM	1	0.801092	MM123
CHR02FS007301759	AT2G16835	GENE_PROM	1	0.651169	MM25
CHR02FS007301759	AT2G16835	GENE_PROM	1	0.651169	MM25
CHR02FS007534626	AT2G17305	GENE_PROM	2	0.328031	MM382
CHR02FS007784762	AT2G17900	GENE_PROM	2	0.466477	MM382
CHR02FS008420801	AT2G19425	GENE_PROM	4	-0.327567	MM686
CHR02FS008420801	AT2G19430	GENE_PROM	4	-0.327567	MM686
CHR02FS008420801	AT2G19425	GENE_PROM	4	-0.327567	MM686
CHR02FS008420801	AT2G19430	GENE_PROM	4	-0.327567	MM686
CHR02FS008420801	AT2G19425	GENE_PROM	4	-0.327567	MM686
CHR02FS008420801	AT2G19430	GENE_PROM	4	-0.327567	MM686
CHR02FS008420801	AT2G19425	GENE_PROM	4	-0.327567	MM686
CHR02FS008420801	AT2G19430	GENE_PROM	4	-0.327567	MM686
CHR02FS008882476	AT2G20605	GENE_PROM	2	0.528964	MM382
CHR02FS009743314	AT2G22860	GENE_PROM	1	0.399176	MM25
CHR02FS009743314	AT2G22860	GENE_PROM	1	0.399176	MM25
CHR02FS009743314	AT2G22860	GENE_PROM	1	0.366623	MM91
CHR02FS009743314	AT2G22860	GENE_PROM	1	0.37176	MM123
CHR02FS009743314	AT2G22860	GENE_PROM	1	0.37176	MM123
CHR02FS009743314	AT2G01735	GENE_PROM	2	0.525333	MM168
CHR02FS009743314	AT2G01735	GENE_PROM	2	0.521007	MM240
CHR02FS009743314	AT2G01735	GENE_PROM	2	0.494009	MM330
CHR02FS009743314	AT2G01735	GENE_PROM	2	0.450904	MM373
CHR03FS001075642	AT3G04090	GENE_PROM	2	0.353862	MM168
CHR03FS001075642	AT3G04090	GENE_PROM	2	0.33986	MM240
CHR03FS001075642	AT3G04090	GENE_PROM	2	0.346303	MM330
CHR03FS002818378	AT3G09180	GENE_PROM	1	0.3709	MM10
CHR03FS002818593	AT3G09180	GENE_PROM	1	0.388522	MM25
CHR03FS002818593	AT3G09180	GENE_PROM	1	0.388522	MM25
CHR03FS005278196	AT3G15590	GENE_PROM	2	0.511472	MM373
CHR03FS005278196	AT3G15590	GENE_PROM	2	0.311155	MM382
CHR03FS005278361	AT3G15590	GENE_PROM	2	0.628685	MM240
CHR03FS005278531	AT3G15590	GENE_PROM	2	0.581033	MM168
CHR03FS005278531	AT3G15590	GENE_PROM	2	0.601882	MM330
CHR03FS005286109	AT3G15605	GENE_PROM	2	0.603968	MM168
CHR03FS005286109	AT3G15605	GENE_PROM	2	0.639901	MM240
CHR03FS005286109	AT3G15605	GENE_PROM	2	0.621244	MM330
CHR03FS005286109	AT3G15605	GENE_PROM	2	0.542879	MM373
CHR03FS005286109	AT3G15605	GENE_PROM	2	0.496266	MM382
CHR03FS005286109	AT3G15605	GENE_PROM	4	0.364978	MM587
CHR03FS005286454	AT3G15605	GENE_PROM	4	0.357037	MM654
CHR03FS005286454	AT3G15605	GENE_PROM	4	0.357037	MM654
CHR03FS005286454	AT3G15605	GENE_PROM	4	0.357037	MM654
CHR03FS005286454	AT3G15605	GENE_PROM	4	0.357037	MM654
CHR03FS005651417	AT3G16590	GENE_PROM	1	0.806013	MM123
CHR03FS005651417	AT3G16590	GENE_PROM	1	0.806013	MM123
CHR03FS005651646	AT3G16590	GENE_PROM	1	0.418058	MM5
CHR03FS005651646	AT3G16590	GENE_PROM	1	0.473564	MM10
CHR03FS005651646	AT3G16590	GENE_PROM	1	0.665045	MM25
CHR03FS005651646	AT3G16590	GENE_PROM	1	0.665045	MM25
CHR03FS005651646	AT3G16590	GENE_PROM	1	0.733747	MM91
CHR03FS005652266	AT3G16590	GENE_PROM	4	0.367058	MM654
CHR03FS005652266	AT3G16590	GENE_PROM	4	0.367058	MM654
CHR03FS005652266	AT3G16590	GENE_PROM	4	0.367058	MM654
CHR03FS005652266	AT3G16590	GENE_PROM	4	0.367058	MM654
CHR03FS005839552	AT3G17120	GENE_PROM	2	0.377344	MM168
CHR03FS005839552	AT3G17120	GENE_PROM	2	0.389213	MM240
CHR03FS005839552	AT3G17120	GENE_PROM	2	0.367325	MM330
CHR03FS005839552	AT3G17120	GENE_PROM	5	0.399121	MM865
CHR03FS005840347	AT3G17120	GENE_PROM	1	0.354454	MM25
CHR03FS005840347	AT3G17120	GENE_PROM	1	0.354454	MM25
CHR03FS005840347	AT3G17120	GENE_PROM	1	0.381604	MM91
CHR03FS005840347	AT3G17120	GENE_PROM	1	0.430224	MM123
CHR03FS005840347	AT3G17120	GENE_PROM	1	0.430224	MM123
CHR03FS005840347	AT3G17120	GENE_PROM	5	0.373046	MM823
CHR03FS005840347	AT3G17120	GENE_PROM	5	0.355627	MM859
CHR03FS005840347	AT3G17120	GENE_PROM	5	0.378131	MM862
CHR03FS005840347	AT3G17120	GENE_PROM	5	0.378131	MM862
CHR03FS005840347	AT3G17120	GENE_PROM	5	0.378131	MM862
CHR03FS007749121	AT3G21990	GENE_PROM	4	0.406857	MM686
CHR03FS007749121	AT3G21990	GENE_PROM	4	0.406857	MM686
CHR03FS007749121	AT3G21990	GENE_PROM	4	0.406857	MM686
CHR03FS007749121	AT3G21990	GENE_PROM	4	0.406857	MM686
CHR03FS008526545	AT3G23685	GENE_PROM	3	0.408738	MM427
CHR03FS008527535	AT3G23680	GENE_PROM	3	0.383586	MM432
CHR03FS008842880	AT3G24360	GENE_PROM	1	0.489668	MM10
CHR03FS008842880	AT3G24360	GENE_PROM	1	0.627878	MM25
CHR03FS008842880	AT3G24360	GENE_PROM	1	0.627878	MM25
CHR03FS008842880	AT3G24360	GENE_PROM	1	0.680402	MM91
CHR03FS008842880	AT3G24360	GENE_PROM	1	0.770583	MM123
CHR03FS008842880	AT3G24360	GENE_PROM	1	0.770583	MM123
CHR03FS008843185	AT3G24360	GENE_PROM	1	0.444676	MM5
CHR03FS008843185	AT3G24360	GENE_PROM	2	0.365876	MM168
CHR03FS008843185	AT3G24360	GENE_PROM	2	0.37407	MM240
CHR03FS008843185	AT3G24360	GENE_PROM	2	0.368431	MM330
CHR03FS008843361	AT3G24360	GENE_PROM	5	0.357815	MM823
CHR03FS008843681	AT3G24360	GENE_PROM	4	0.367475	MM587
CHR03FS008843681	AT3G24360	GENE_PROM	4	0.350709	MM654
CHR03FS008843681	AT3G24360	GENE_PROM	4	0.350709	MM654
CHR03FS008843681	AT3G24360	GENE_PROM	4	0.350709	MM654
CHR03FS008843681	AT3G24360	GENE_PROM	4	0.350709	MM654
CHR03FS008937557	AT3G24515	GENE_PROM	3	0.458111	MM427
CHR03FS008937557	AT3G24515	GENE_PROM	3	0.440388	MM432
CHR03FS008938072	AT3G24516	GENE_PROM	3	0.460421	MM427
CHR03FS009472325	AT3G25880	GENE_PROM	1	0.385529	MM91
CHR03FS009472325	AT3G25882	GENE_PROM	1	0.385529	MM91
CHR03FS009472325	AT3G25880	GENE_PROM	1	0.367118	MM123
CHR03FS009472325	AT3G25882	GENE_PROM	1	0.367118	MM123
CHR03FS009472325	AT3G25880	GENE_PROM	1	0.367118	MM123
CHR03FS009472325	AT3G25882	GENE_PROM	1	0.367118	MM123
CHR03FS009472325	AT3G25880	GENE_PROM	2	0.431991	MM168
CHR03FS009472325	AT3G25882	GENE_PROM	2	0.431991	MM168
CHR03FS009472325	AT3G25880	GENE_PROM	2	0.424583	MM240
CHR03FS009472325	AT3G25882	GENE_PROM	2	0.424583	MM240
CHR03FS009472325	AT3G25880	GENE_PROM	2	0.404426	MM330
CHR03FS009472325	AT3G25882	GENE_PROM	2	0.404426	MM330
CHR03FS009472535	AT3G25880	GENE_PROM	1	0.365725	MM25
CHR03FS009472535	AT3G25882	GENE_PROM	1	0.365725	MM25
CHR03FS009472535	AT3G25880	GENE_PROM	1	0.365725	MM25
CHR03FS009472535	AT3G25882	GENE_PROM	1	0.365725	MM25
CHR03FS009472535	AT3G25880	GENE_PROM	5	0.393743	MM865
CHR03FS009472535	AT3G25880	GENE_PROM	5	0.339698	MM823
CHR03FS009472535	AT3G25880	GENE_PROM	5	0.35004	MM859
CHR03FS009472535	AT3G25880	GENE_PROM	5	0.376874	MM862
CHR03FS009472535	AT3G25880	GENE_PROM	5	0.376874	MM862
CHR03FS009472535	AT3G25880	GENE_PROM	5	0.376874	MM862
CHR03FS009473025	AT3G25882	GENE_PROM	5	0.410474	MM865
CHR03FS009473025	AT3G25882	GENE_PROM	5	0.375933	MM823
CHR03FS009473025	AT3G25882	GENE_PROM	5	0.363693	MM859
CHR03FS009473025	AT3G25882	GENE_PROM	5	0.3937	MM862
CHR03FS009473025	AT3G25882	GENE_PROM	5	0.3937	MM862
CHR03FS009473025	AT3G25882	GENE_PROM	5	0.3937	MM862
CHR03FS010111419	AT3G27328	GENE_PROM	2	0.442874	MM168
CHR03FS010111419	AT3G27328	GENE_PROM	2	0.46885	MM240
CHR03FS010111419	AT3G27328	GENE_PROM	2	0.351637	MM373
CHR03FS010111569	AT3G27328	GENE_PROM	2	0.461369	MM330
CHR03FS010112044	AT3G02300	GENE_PROM	3	0.440143	MM398
CHR03FS010112044	AT3G02300	GENE_PROM	3	0.595596	MM399
CHR03FS010115514	AT3G02315	GENE_PROM	3	0.323035	MM399
CHR03FS010173241	AT3G02468	GENE_PROM	3	0.383324	MM399
CHR03FS010465473	AT3G28120	GENE_PROM	1	0.76025	MM123
CHR03FS010465473	AT3G28130	GENE_PROM	1	0.76025	MM123
CHR03FS010465473	AT3G28120	GENE_PROM	1	0.76025	MM123
CHR03FS010465473	AT3G28130	GENE_PROM	1	0.76025	MM123
CHR03FS010465682	AT3G28120	GENE_PROM	1	0.588233	MM25
CHR03FS010465682	AT3G28130	GENE_PROM	1	0.588233	MM25
CHR03FS010465682	AT3G28120	GENE_PROM	1	0.588233	MM25
CHR03FS010465682	AT3G28130	GENE_PROM	1	0.588233	MM25
CHR03FS010465957	AT3G28130	GENE_PROM	1	0.370041	MM5
CHR03FS010465957	AT3G28120	GENE_PROM	1	0.47608	MM10
CHR03FS010465957	AT3G28130	GENE_PROM	1	0.47608	MM10
CHR03FS010465957	AT3G28130	GENE_PROM	1	0.644671	MM91
CHR03FS010466159	AT3G28130	GENE_PROM	4	0.326449	MM654
CHR03FS010466159	AT3G28130	GENE_PROM	4	0.326449	MM654
CHR03FS010466159	AT3G28130	GENE_PROM	4	0.326449	MM654
CHR03FS010466159	AT3G28130	GENE_PROM	4	0.326449	MM654
CHR03FS010533278	AT3G03290	GENE_PROM	3	0.367901	MM399
CHR03FS010818257	AT3G28790	GENE_PROM	1	0.445382	MM10
CHR03FS010818257	AT3G28790	GENE_PROM	1	0.651665	MM25
CHR03FS010818257	AT3G28790	GENE_PROM	1	0.651665	MM25
CHR03FS010818257	AT3G28790	GENE_PROM	1	0.711604	MM91
CHR03FS010818257	AT3G28790	GENE_PROM	4	0.324275	MM666
CHR03FS010818392	AT3G28790	GENE_PROM	1	0.36691	MM5
CHR03FS010818392	AT3G28790	GENE_PROM	1	0.790266	MM123
CHR03FS010818392	AT3G28790	GENE_PROM	1	0.790266	MM123
CHR03FS010818392	AT3G28790	GENE_PROM	4	0.330528	MM587
CHR03FS010818392	AT3G28790	GENE_PROM	4	0.388153	MM654
CHR03FS010818392	AT3G28790	GENE_PROM	4	0.388153	MM654
CHR03FS010818392	AT3G28790	GENE_PROM	4	0.388153	MM654
CHR03FS010818392	AT3G28790	GENE_PROM	4	0.388153	MM654
CHR03FS011029966	AT3G04100	GENE_PROM	3	0.358777	MM398
CHR03FS011029966	AT3G04100	GENE_PROM	3	0.530541	MM399
CHR03FS011362954	AT3G29560	GENE_PROM	1	0.365344	MM5
CHR03FS011362954	AT3G29560	GENE_PROM	1	0.648697	MM91
CHR03FS011362954	AT3G29560	GENE_PROM	4	0.383934	MM654
CHR03FS011362954	AT3G29560	GENE_PROM	4	0.383934	MM654
CHR03FS011362954	AT3G29560	GENE_PROM	4	0.383934	MM654
CHR03FS011362954	AT3G29560	GENE_PROM	4	0.383934	MM654
CHR03FS011363064	AT3G29560	GENE_PROM	4	0.333024	MM587
CHR03FS011363064	AT3G29560	GENE_PROM	4	0.324594	MM665
CHR03FS011363064	AT3G29560	GENE_PROM	4	0.337561	MM666
CHR03FS011363559	AT3G29560	GENE_PROM	1	0.447395	MM10
CHR03FS011363559	AT3G29560	GENE_PROM	1	0.590711	MM25
CHR03FS011363559	AT3G29560	GENE_PROM	1	0.590711	MM25
CHR03FS011363559	AT3G29560	GENE_PROM	1	0.761726	MM123
CHR03FS011363559	AT3G29560	GENE_PROM	1	0.761726	MM123
CHR03FS011455627	AT3G29633	GENE_PROM	1	-0.279993	MM25
CHR03FS011455627	AT3G29633	GENE_PROM	1	-0.279993	MM25
CHR03FS011455627	AT3G04600	GENE_PROM	3	0.422123	MM398
CHR03FS011455627	AT3G04600	GENE_PROM	3	0.513155	MM399
CHR03FS011544065	AT3G29690	GENE_PROM	2	0.498028	MM168
CHR03FS011544065	AT3G29690	GENE_PROM	2	0.514276	MM240
CHR03FS011544065	AT3G29690	GENE_PROM	2	0.509497	MM330
CHR03FS011544065	AT3G29690	GENE_PROM	2	0.538953	MM373
CHR03FS011544065	AT3G29690	GENE_PROM	4	0.352818	MM654
CHR03FS011544065	AT3G29690	GENE_PROM	4	0.352818	MM654
CHR03FS011544065	AT3G29690	GENE_PROM	4	0.352818	MM654
CHR03FS011544065	AT3G29690	GENE_PROM	4	0.352818	MM654
CHR03FS011544270	AT3G29690	GENE_PROM	2	0.426124	MM382
CHR03FS011579902	AT3G04700	GENE_PROM	3	0.452435	MM398
CHR03FS011580257	AT3G04700	GENE_PROM	3	0.505867	MM399
CHR03FS011583835	AT3G04710	GENE_PROM	3	0.434136	MM398
CHR03FS011583835	AT3G04710	GENE_PROM	3	0.501938	MM399
CHR03FS011672823	AT3G04740	GENE_PROM	3	0.449785	MM399
CHR03FS011696246	AT3G29790	GENE_PROM	1	0.375932	MM91
CHR03FS011696246	AT3G29790	GENE_PROM	1	0.383816	MM123
CHR03FS011696246	AT3G29790	GENE_PROM	1	0.383816	MM123
CHR04FS000310586	AT4G00740	GENE_PROM	2	0.328643	MM240
CHR04FS000310586	AT4G00740	GENE_PROM	4	0.31455	MM587
CHR04FS000310586	AT4G00740	GENE_PROM	4	0.324275	MM666
CHR04FS000310701	AT4G00740	GENE_PROM	4	0.374441	MM654
CHR04FS000310701	AT4G00740	GENE_PROM	4	0.374441	MM654
CHR04FS000310701	AT4G00740	GENE_PROM	4	0.374441	MM654
CHR04FS000310701	AT4G00740	GENE_PROM	4	0.374441	MM654
CHR04FS001395963	AT4G03153	GENE_PROM	1	0.356805	MM25
CHR04FS001395963	AT4G03153	GENE_PROM	1	0.356805	MM25
CHR04FS001395963	AT4G03150	GENE_PROM	1	0.389228	MM123
CHR04FS001395963	AT4G03153	GENE_PROM	1	0.389228	MM123
CHR04FS001395963	AT4G03150	GENE_PROM	1	0.389228	MM123
CHR04FS001395963	AT4G03153	GENE_PROM	1	0.389228	MM123
CHR04FS001395963	AT4G03150	GENE_PROM	4	0.646709	MM665
CHR04FS001395963	AT4G03150	GENE_PROM	4	0.637724	MM666
CHR04FS001395963	AT4G03150	GENE_PROM	4	0.395459	MM686
CHR04FS001395963	AT4G03150	GENE_PROM	4	0.395459	MM686
CHR04FS001395963	AT4G03150	GENE_PROM	4	0.395459	MM686
CHR04FS001395963	AT4G03150	GENE_PROM	4	0.395459	MM686
CHR04FS001396068	AT4G03150	GENE_PROM	4	0.632331	MM654
CHR04FS001396068	AT4G03150	GENE_PROM	4	0.632331	MM654
CHR04FS001396568	AT4G03153	GENE_PROM	4	0.666611	MM654
CHR04FS001396568	AT4G03160	GENE_PROM	4	0.666611	MM654
CHR04FS001396568	AT4G03153	GENE_PROM	4	0.666611	MM654
CHR04FS001396568	AT4G03160	GENE_PROM	4	0.666611	MM654
CHR04FS001396568	AT4G03153	GENE_PROM	4	0.681399	MM665
CHR04FS001396568	AT4G03160	GENE_PROM	4	0.681399	MM665
CHR04FS001396568	AT4G03153	GENE_PROM	4	0.673645	MM666
CHR04FS001396568	AT4G03160	GENE_PROM	4	0.673645	MM666
CHR04FS001396568	AT4G03153	GENE_PROM	4	0.406857	MM686
CHR04FS001396568	AT4G03160	GENE_PROM	4	0.406857	MM686
CHR04FS001396568	AT4G03153	GENE_PROM	4	0.406857	MM686
CHR04FS001396568	AT4G03160	GENE_PROM	4	0.406857	MM686
CHR04FS001396568	AT4G03153	GENE_PROM	4	0.406857	MM686
CHR04FS001396568	AT4G03160	GENE_PROM	4	0.406857	MM686
CHR04FS001396568	AT4G03153	GENE_PROM	4	0.406857	MM686
CHR04FS001396568	AT4G03160	GENE_PROM	4	0.406857	MM686
CHR04FS001397108	AT4G03156	GENE_PROM	2	0.332019	MM168
CHR04FS001397108	AT4G03160	GENE_PROM	2	0.332019	MM168
CHR04FS001397223	AT4G03156	GENE_PROM	2	0.377435	MM240
CHR04FS001397223	AT4G03160	GENE_PROM	2	0.377435	MM240
CHR04FS001397223	AT4G03156	GENE_PROM	2	0.348516	MM330
CHR04FS001397223	AT4G03160	GENE_PROM	2	0.348516	MM330
CHR04FS001438685	AT4G03280	GENE_PROM	1	0.438336	MM10
CHR04FS001438685	AT4G03280	GENE_PROM	1	0.551066	MM25
CHR04FS001438685	AT4G03280	GENE_PROM	1	0.551066	MM25
CHR04FS001438685	AT4G03280	GENE_PROM	1	0.492688	MM91
CHR04FS001438685	AT4G03280	GENE_PROM	4	0.372332	MM654
CHR04FS001438685	AT4G03280	GENE_PROM	4	0.372332	MM654
CHR04FS001438835	AT4G03280	GENE_PROM	1	0.476325	MM123
CHR04FS001438835	AT4G03280	GENE_PROM	1	0.476325	MM123
CHR04FS001438835	AT4G03280	GENE_PROM	4	0.337478	MM665
CHR04FS001439135	AT4G03280	GENE_PROM	4	0.35626	MM666
CHR04FS001462925	AT4G03320	GENE_PROM	1	0.396137	MM5
CHR04FS001462925	AT4G03320	GENE_PROM	2	0.370245	MM168
CHR04FS001462925	AT4G03320	GENE_PROM	2	0.389773	MM240
CHR04FS001462925	AT4G03320	GENE_PROM	2	0.375623	MM330
CHR04FS001462925	AT4G03320	GENE_PROM	4	0.362311	MM654
CHR04FS001462925	AT4G03320	GENE_PROM	4	0.362311	MM654
CHR04FS001463440	AT4G03320	GENE_PROM	1	0.446388	MM10
CHR04FS001463440	AT4G03320	GENE_PROM	1	0.591206	MM25
CHR04FS001463440	AT4G03320	GENE_PROM	1	0.591206	MM25
CHR04FS001463440	AT4G03320	GENE_PROM	1	0.686944	MM91
CHR04FS001463440	AT4G03320	GENE_PROM	1	0.769599	MM123
CHR04FS001463440	AT4G03320	GENE_PROM	1	0.769599	MM123
CHR04FS001568529	AT4G03540	GENE_PROM	3	0.358928	MM399
CHR04FS001568529	AT4G03540	GENE_PROM	5	0.400913	MM865
CHR04FS001568529	AT4G03540	GENE_PROM	5	0.361507	MM859
CHR04FS001568529	AT4G03540	GENE_PROM	5	0.362854	MM862
CHR04FS001568529	AT4G03540	GENE_PROM	5	0.362854	MM862
CHR04FS001568529	AT4G03540	GENE_PROM	5	0.362854	MM862
CHR04FS001568834	AT4G03540	GENE_PROM	1	0.316169	MM25
CHR04FS001568834	AT4G03540	GENE_PROM	1	0.316169	MM25
CHR04FS001568834	AT4G03540	GENE_PROM	1	0.298431	MM91
CHR04FS001568834	AT4G03540	GENE_PROM	1	0.280481	MM123
CHR04FS001568834	AT4G03540	GENE_PROM	1	0.280481	MM123
CHR04FS001594129	AT4G03570	GENE_PROM	4	0.678217	MM654
CHR04FS001594129	AT4G03570	GENE_PROM	4	0.678217	MM654
CHR04FS001594431	AT4G03570	GENE_PROM	4	0.702709	MM665
CHR04FS001594431	AT4G03570	GENE_PROM	4	0.708092	MM666
CHR04FS001594726	AT4G03570	GENE_PROM	4	0.436095	MM686
CHR04FS001594726	AT4G03570	GENE_PROM	4	0.436095	MM686
CHR04FS001594726	AT4G03570	GENE_PROM	4	0.436095	MM686
CHR04FS001594726	AT4G03570	GENE_PROM	4	0.436095	MM686
CHR04FS001596067	AT4G03580	GENE_PROM	1	0.292878	MM25
CHR04FS001596067	AT4G03580	GENE_PROM	1	0.292878	MM25
CHR04FS001596067	AT4G03580	GENE_PROM	1	0.317878	MM123
CHR04FS001596067	AT4G03580	GENE_PROM	1	0.317878	MM123
CHR04FS001596067	AT4G03580	GENE_PROM	4	0.645515	MM654
CHR04FS001596067	AT4G03580	GENE_PROM	4	0.645515	MM654
CHR04FS001596067	AT4G03580	GENE_PROM	4	0.728973	MM665
CHR04FS001596067	AT4G03580	GENE_PROM	4	0.737615	MM666
CHR04FS001596227	AT4G03580	GENE_PROM	4	0.476731	MM686
CHR04FS001596227	AT4G03580	GENE_PROM	4	0.476731	MM686
CHR04FS001596227	AT4G03580	GENE_PROM	4	0.476731	MM686
CHR04FS001596227	AT4G03580	GENE_PROM	4	0.476731	MM686
CHR04FS001971789	AT4G04110	GENE_PROM	4	0.666611	MM654
CHR04FS001971789	AT4G04110	GENE_PROM	4	0.666611	MM654
CHR04FS001971789	AT4G04110	GENE_PROM	4	0.699239	MM665
CHR04FS001971789	AT4G04110	GENE_PROM	4	0.67463	MM666
CHR04FS002036475	AT4G04221	GENE_PROM	4	0.385259	MM654
CHR04FS002036475	AT4G04223	GENE_PROM	4	0.385259	MM654
CHR04FS002036475	AT4G04221	GENE_PROM	4	0.385259	MM654
CHR04FS002036475	AT4G04223	GENE_PROM	4	0.385259	MM654
CHR04FS002036475	AT4G04221	GENE_PROM	4	0.424705	MM665
CHR04FS002036475	AT4G04223	GENE_PROM	4	0.424705	MM665
CHR04FS002036475	AT4G04221	GENE_PROM	4	0.419744	MM666
CHR04FS002036475	AT4G04223	GENE_PROM	4	0.419744	MM666
CHR04FS002036475	AT4G04221	GENE_PROM	4	0.382333	MM686
CHR04FS002036475	AT4G04223	GENE_PROM	4	0.382333	MM686
CHR04FS002036475	AT4G04221	GENE_PROM	4	0.382333	MM686
CHR04FS002036475	AT4G04223	GENE_PROM	4	0.382333	MM686
CHR04FS002036475	AT4G04221	GENE_PROM	4	0.382333	MM686
CHR04FS002036475	AT4G04223	GENE_PROM	4	0.382333	MM686
CHR04FS002036475	AT4G04221	GENE_PROM	4	0.382333	MM686
CHR04FS002036475	AT4G04223	GENE_PROM	4	0.382333	MM686
CHR04FS002137129	AT4G04370	GENE_PROM	4	0.397441	MM686
CHR04FS002137129	AT4G04370	GENE_PROM	4	0.397441	MM686
CHR04FS002137129	AT4G04370	GENE_PROM	4	0.397441	MM686
CHR04FS002137129	AT4G04370	GENE_PROM	4	0.397441	MM686
CHR04FS002137289	AT4G04370	GENE_PROM	4	0.649207	MM654
CHR04FS002137289	AT4G04370	GENE_PROM	4	0.649207	MM654
CHR04FS002137289	AT4G04370	GENE_PROM	4	0.651169	MM665
CHR04FS002137289	AT4G04370	GENE_PROM	4	0.641169	MM666
CHR04FS002163832	AT4G04402	GENE_PROM	1	0.334162	MM91
CHR04FS002163832	AT4G04402	GENE_PROM	1	0.368561	MM123
CHR04FS002163832	AT4G04402	GENE_PROM	1	0.368561	MM123
CHR04FS002163832	AT4G04402	GENE_PROM	2	0.395364	MM168
CHR04FS002163832	AT4G04402	GENE_PROM	2	0.409402	MM240
CHR04FS002163832	AT4G04402	GENE_PROM	2	0.403836	MM330
CHR04FS002202752	AT4G04423	GENE_PROM	1	0.371906	MM10
CHR04FS002202752	AT4G04423	GENE_PROM	1	0.419246	MM25
CHR04FS002202752	AT4G04423	GENE_PROM	1	0.419246	MM25
CHR04FS002202752	AT4G04423	GENE_PROM	1	0.431794	MM91
CHR04FS002202752	AT4G04423	GENE_PROM	1	0.438927	MM123
CHR04FS002202752	AT4G04423	GENE_PROM	1	0.438927	MM123
CHR04FS002202752	AT4G04423	GENE_PROM	4	0.364421	MM654
CHR04FS002202752	AT4G04423	GENE_PROM	4	0.364421	MM654
CHR04FS002203102	AT4G04423	GENE_PROM	2	0.3555	MM168
CHR04FS002203102	AT4G04423	GENE_PROM	2	0.342664	MM240
CHR04FS002203102	AT4G04423	GENE_PROM	2	0.325835	MM330
CHR04FS002235464	AT4G04490	GENE_PROM	4	0.309513	MM666
CHR04FS002235601	AT4G04490	GENE_PROM	1	0.689964	MM91
CHR04FS002235966	AT4G04490	GENE_PROM	1	0.80306	MM123
CHR04FS002235966	AT4G04490	GENE_PROM	1	0.80306	MM123
CHR04FS002236091	AT4G04490	GENE_PROM	1	0.360125	MM5
CHR04FS002236091	AT4G04490	GENE_PROM	1	0.471048	MM10
CHR04FS002236091	AT4G04490	GENE_PROM	1	0.667027	MM25
CHR04FS002236091	AT4G04490	GENE_PROM	1	0.667027	MM25
CHR04FS002236091	AT4G04490	GENE_PROM	4	0.387626	MM654
CHR04FS002236091	AT4G04490	GENE_PROM	4	0.387626	MM654
CHR04FS002236911	AT4G04500	GENE_PROM	1	0.492688	MM10
CHR04FS002236911	AT4G04500	GENE_PROM	1	0.651665	MM25
CHR04FS002236911	AT4G04500	GENE_PROM	1	0.651665	MM25
CHR04FS002236911	AT4G04500	GENE_PROM	1	0.661782	MM91
CHR04FS002236911	AT4G04500	GENE_PROM	1	0.738599	MM123
CHR04FS002236911	AT4G04500	GENE_PROM	1	0.738599	MM123
CHR04FS002237456	AT4G04500	GENE_PROM	4	0.462514	MM654
CHR04FS002237456	AT4G04500	GENE_PROM	4	0.462514	MM654
CHR04FS002237456	AT4G04500	GENE_PROM	4	0.37861	MM665
CHR04FS002237456	AT4G04500	GENE_PROM	4	0.391689	MM666
CHR04FS002237737	AT4G04500	GENE_PROM	2	0.310175	MM168
CHR04FS002237737	AT4G04500	GENE_PROM	2	0.362854	MM240
CHR04FS002237896	AT4G04500	GENE_PROM	2	0.344091	MM330
CHR04FS002288614	AT4G04570	GENE_PROM	1	0.322312	MM123
CHR04FS002288614	AT4G04570	GENE_PROM	1	0.322312	MM123
CHR04FS002288614	AT4G04570	GENE_PROM	4	0.643416	MM654
CHR04FS002288614	AT4G04570	GENE_PROM	4	0.643416	MM654
CHR04FS002288614	AT4G04570	GENE_PROM	4	0.674472	MM665
CHR04FS002288614	AT4G04570	GENE_PROM	4	0.676609	MM666
CHR04FS002288764	AT4G04570	GENE_PROM	4	0.439564	MM686
CHR04FS002288764	AT4G04570	GENE_PROM	4	0.439564	MM686
CHR04FS002288764	AT4G04570	GENE_PROM	4	0.439564	MM686
CHR04FS002288764	AT4G04570	GENE_PROM	4	0.439564	MM686
CHR04FS002310009	AT4G04601	GENE_PROM	4	0.622838	MM654
CHR04FS002310009	AT4G04601	GENE_PROM	4	0.622838	MM654
CHR04FS002310334	AT4G04601	GENE_PROM	4	0.438077	MM686
CHR04FS002310334	AT4G04601	GENE_PROM	4	0.438077	MM686
CHR04FS002310334	AT4G04601	GENE_PROM	4	0.438077	MM686
CHR04FS002310334	AT4G04601	GENE_PROM	4	0.438077	MM686
CHR04FS002310519	AT4G04601	GENE_PROM	4	0.632338	MM665
CHR04FS002310519	AT4G04601	GENE_PROM	4	0.63428	MM666
CHR04FS002355263	AT4G04650	GENE_PROM	4	0.666107	MM654
CHR04FS002355263	AT4G04650	GENE_PROM	4	0.666107	MM654
CHR04FS002356046	AT4G04650	GENE_PROM	4	0.627397	MM665
CHR04FS002356046	AT4G04650	GENE_PROM	4	0.630849	MM666
CHR04FS002356551	AT4G04650	GENE_PROM	4	0.446006	MM686
CHR04FS002356551	AT4G04650	GENE_PROM	4	0.446006	MM686
CHR04FS002356551	AT4G04650	GENE_PROM	4	0.446006	MM686
CHR04FS002356551	AT4G04650	GENE_PROM	4	0.446006	MM686
CHR04FS002601607	AT4G05080	GENE_PROM	4	0.522326	MM686
CHR04FS002601607	AT4G05080	GENE_PROM	4	0.522326	MM686
CHR04FS002601607	AT4G05080	GENE_PROM	4	0.522326	MM686
CHR04FS002601607	AT4G05080	GENE_PROM	4	0.522326	MM686
CHR04FS002602567	AT4G05080	GENE_PROM	2	0.313501	MM240
CHR04FS002690018	AT4G05250	GENE_PROM	1	0.440404	MM123
CHR04FS002690018	AT4G05250	GENE_PROM	1	0.440404	MM123
CHR04FS002695976	AT4G05265	GENE_PROM	1	0.511916	MM25
CHR04FS002695976	AT4G05265	GENE_PROM	1	0.511916	MM25
CHR04FS002696136	AT4G05265	GENE_PROM	1	0.38625	MM10
CHR04FS002696136	AT4G05265	GENE_PROM	1	0.517096	MM91
CHR04FS002696136	AT4G05265	GENE_PROM	1	0.616566	MM123
CHR04FS002696136	AT4G05265	GENE_PROM	1	0.616566	MM123
CHR04FS002696136	AT4G05265	GENE_PROM	2	0.328364	MM240
CHR04FS002713624	AT4G05310	GENE_PROM	1	0.70317	MM123
CHR04FS002713624	AT4G05310	GENE_PROM	1	0.70317	MM123
CHR04FS002713955	AT4G05310	GENE_PROM	1	0.440501	MM5
CHR04FS002713955	AT4G05310	GENE_PROM	1	0.52238	MM10
CHR04FS002713955	AT4G05310	GENE_PROM	1	0.604091	MM25
CHR04FS002713955	AT4G05310	GENE_PROM	1	0.604091	MM25
CHR04FS002713955	AT4G05310	GENE_PROM	1	0.628064	MM91
CHR04FS002713955	AT4G05310	GENE_PROM	2	0.332569	MM240
CHR04FS002713955	AT4G05310	GENE_PROM	2	0.330814	MM330
CHR04FS002714125	AT4G05310	GENE_PROM	2	0.320551	MM168
CHR04FS002809627	AT4G05523	GENE_PROM	1	0.347077	MM5
CHR04FS002809627	AT4G05523	GENE_PROM	1	0.516341	MM10
CHR04FS002809627	AT4G05523	GENE_PROM	2	0.323035	MM240
CHR04FS002809817	AT4G05523	GENE_PROM	1	0.623418	MM25
CHR04FS002809817	AT4G05523	GENE_PROM	1	0.623418	MM25
CHR04FS002809817	AT4G05523	GENE_PROM	1	0.545026	MM91
CHR04FS002809817	AT4G05523	GENE_PROM	1	0.561945	MM123
CHR04FS002809817	AT4G05523	GENE_PROM	1	0.561945	MM123
CHR04FS002985514	AT4G05620	GENE_PROM	1	0.377372	MM25
CHR04FS002985514	AT4G05620	GENE_PROM	1	0.377372	MM25
CHR04FS003066034	AT4G06479	GENE_PROM	1	0.41418	MM91
CHR04FS003066034	AT4G06479	GENE_PROM	1	0.471404	MM123
CHR04FS003066034	AT4G06479	GENE_PROM	1	0.471404	MM123
CHR04FS003066254	AT4G06479	GENE_PROM	1	0.380965	MM10
CHR04FS003066254	AT4G06479	GENE_PROM	1	0.464838	MM25
CHR04FS003066254	AT4G06479	GENE_PROM	1	0.464838	MM25
CHR04FS003066254	AT4G06479	GENE_PROM	4	0.424202	MM686
CHR04FS003066254	AT4G06479	GENE_PROM	4	0.424202	MM686
CHR04FS003066254	AT4G06479	GENE_PROM	4	0.424202	MM686
CHR04FS003066254	AT4G06479	GENE_PROM	4	0.424202	MM686
CHR04FS003067379	AT4G06479	GENE_PROM	2	0.362053	MM168
CHR04FS003067379	AT4G06479	GENE_PROM	2	0.377996	MM240
CHR04FS003067379	AT4G06479	GENE_PROM	2	0.366219	MM330
CHR04FS003116357	AT4G06490	GENE_PROM	2	0.31911	MM240
CHR04FS003116577	AT4G06490	GENE_PROM	4	0.445015	MM686
CHR04FS003116577	AT4G06490	GENE_PROM	4	0.445015	MM686
CHR04FS003116577	AT4G06490	GENE_PROM	4	0.445015	MM686
CHR04FS003116577	AT4G06490	GENE_PROM	4	0.445015	MM686
CHR04FS003321351	AT4G06526	GENE_PROM	1	0.34775	MM91
CHR04FS003321351	AT4G06526	GENE_PROM	1	0.368561	MM123
CHR04FS003321351	AT4G06526	GENE_PROM	1	0.368561	MM123
CHR04FS003321666	AT4G06526	GENE_PROM	1	0.32762	MM10
CHR04FS003360614	AT4G06536	GENE_PROM	4	0.436095	MM686
CHR04FS003360614	AT4G06536	GENE_PROM	4	0.436095	MM686
CHR04FS003360614	AT4G06536	GENE_PROM	4	0.436095	MM686
CHR04FS003360614	AT4G06536	GENE_PROM	4	0.436095	MM686
CHR04FS004458994	AT4G07666	GENE_PROM	1	0.345234	MM10
CHR04FS004458994	AT4G07666	GENE_PROM	1	0.420733	MM25
CHR04FS004458994	AT4G07666	GENE_PROM	1	0.420733	MM25
CHR04FS004459654	AT4G07666	GENE_PROM	1	0.339698	MM91
CHR04FS004459654	AT4G07666	GENE_PROM	1	0.409895	MM123
CHR04FS004459654	AT4G07666	GENE_PROM	1	0.409895	MM123
CHR04FS004461492	AT4G07670	GENE_PROM	2	0.303772	MM382
CHR04FS004461642	AT4G07670	GENE_PROM	1	0.420219	MM91
CHR04FS004461642	AT4G07670	GENE_PROM	1	0.415308	MM123
CHR04FS004461642	AT4G07670	GENE_PROM	1	0.415308	MM123
CHR04FS004461642	AT4G07670	GENE_PROM	2	0.438505	MM168
CHR04FS004461642	AT4G07670	GENE_PROM	2	0.444734	MM240
CHR04FS004461642	AT4G07670	GENE_PROM	2	0.443113	MM330
CHR04FS004461642	AT4G07670	GENE_PROM	2	0.365658	MM373
CHR04FS004461962	AT4G07670	GENE_PROM	1	0.328288	MM5
CHR04FS004462432	AT4G07670	GENE_PROM	1	0.379455	MM10
CHR04FS004462432	AT4G07670	GENE_PROM	1	0.388521	MM25
CHR04FS004462432	AT4G07670	GENE_PROM	1	0.388521	MM25
CHR04FS004462812	AT4G07670	GENE_PROM	4	0.416273	MM686
CHR04FS004462812	AT4G07670	GENE_PROM	4	0.416273	MM686
CHR04FS004462812	AT4G07670	GENE_PROM	4	0.416273	MM686
CHR04FS004462812	AT4G07670	GENE_PROM	4	0.416273	MM686
CHR04FS004604987	AT4G07786	GENE_PROM	1	0.323107	MM25
CHR04FS004604987	AT4G07786	GENE_PROM	1	0.323107	MM25
CHR04FS004605358	AT4G07786	GENE_PROM	2	0.333305	MM382
CHR04FS004642441	AT4G07825	GENE_PROM	1	0.326613	MM10
CHR04FS004642441	AT4G07825	GENE_PROM	1	0.378952	MM91
CHR04FS004642441	AT4G07825	GENE_PROM	1	0.394149	MM123
CHR04FS004642441	AT4G07825	GENE_PROM	1	0.394149	MM123
CHR04FS004642441	AT4G07825	GENE_PROM	2	0.333111	MM168
CHR04FS004642441	AT4G07825	GENE_PROM	2	0.367901	MM240
CHR04FS004642441	AT4G07825	GENE_PROM	2	0.343537	MM330
CHR04FS004642606	AT4G07825	GENE_PROM	1	0.412804	MM25
CHR04FS004642606	AT4G07825	GENE_PROM	1	0.412804	MM25
CHR04FS004730724	AT4G07932	GENE_PROM	2	0.327522	MM240
CHR04FS004731058	AT4G07932	GENE_PROM	1	0.346398	MM25
CHR04FS004731058	AT4G07932	GENE_PROM	1	0.346398	MM25
CHR04FS004731058	AT4G07932	GENE_PROM	1	0.381847	MM123
CHR04FS004731058	AT4G07932	GENE_PROM	1	0.381847	MM123
CHR04FS004731913	AT4G07932	GENE_PROM	1	0.305476	MM91
CHR04FS004850183	AT4G08028	GENE_PROM	4	0.337974	MM686
CHR04FS004850183	AT4G08028	GENE_PROM	4	0.337974	MM686
CHR04FS004850183	AT4G08028	GENE_PROM	4	0.337974	MM686
CHR04FS004850183	AT4G08028	GENE_PROM	4	0.337974	MM686
CHR04FS004865376	AT4G08035	GENE_PROM	1	0.359779	MM25
CHR04FS004865376	AT4G08035	GENE_PROM	1	0.359779	MM25
CHR04FS004865561	AT4G08035	GENE_PROM	4	0.408344	MM686
CHR04FS004865561	AT4G08035	GENE_PROM	4	0.408344	MM686
CHR04FS004865561	AT4G08035	GENE_PROM	4	0.408344	MM686
CHR04FS004865561	AT4G08035	GENE_PROM	4	0.408344	MM686
CHR04FS004866216	AT4G08035	GENE_PROM	1	0.34775	MM91
CHR04FS004866216	AT4G08035	GENE_PROM	1	0.355767	MM123
CHR04FS004866216	AT4G08035	GENE_PROM	1	0.355767	MM123
CHR04FS005175730	AT4G08190	GENE_PROM	4	0.39199	MM686
CHR04FS005175730	AT4G08190	GENE_PROM	4	0.39199	MM686
CHR04FS005175730	AT4G08190	GENE_PROM	4	0.39199	MM686
CHR04FS005175730	AT4G08190	GENE_PROM	4	0.39199	MM686
CHR04FS005176065	AT4G08190	GENE_PROM	2	0.452703	MM168
CHR04FS005176065	AT4G08190	GENE_PROM	2	0.498013	MM240
CHR04FS005176065	AT4G08190	GENE_PROM	2	0.463029	MM330
CHR04FS005304647	AT4G08370	GENE_PROM	4	0.484202	MM686
CHR04FS005304647	AT4G08370	GENE_PROM	4	0.484202	MM686
CHR04FS005304647	AT4G08370	GENE_PROM	4	0.484202	MM686
CHR04FS005304647	AT4G08370	GENE_PROM	4	0.484202	MM686
CHR04FS005351009	AT4G08430	GENE_PROM	4	0.448484	MM686
CHR04FS005351009	AT4G08430	GENE_PROM	4	0.448484	MM686
CHR04FS005351009	AT4G08430	GENE_PROM	4	0.448484	MM686
CHR04FS005351009	AT4G08430	GENE_PROM	4	0.448484	MM686
CHR04FS005351159	AT4G08430	GENE_PROM	1	0.372168	MM25
CHR04FS005351159	AT4G08430	GENE_PROM	1	0.372168	MM25
CHR04FS005351159	AT4G08430	GENE_PROM	1	0.39103	MM91
CHR04FS005351159	AT4G08430	GENE_PROM	1	0.406451	MM123
CHR04FS005351159	AT4G08430	GENE_PROM	1	0.406451	MM123
CHR04FS005468990	AT4G08593	GENE_PROM	4	0.458891	MM686
CHR04FS005468990	AT4G08593	GENE_PROM	4	0.458891	MM686
CHR04FS005468990	AT4G08593	GENE_PROM	4	0.458891	MM686
CHR04FS005468990	AT4G08593	GENE_PROM	4	0.458891	MM686
CHR04FS005511992	AT4G08640	GENE_PROM	1	0.309729	MM25
CHR04FS005511992	AT4G08640	GENE_PROM	1	0.309729	MM25
CHR04FS005512217	AT4G08640	GENE_PROM	4	0.39199	MM686
CHR04FS005512217	AT4G08640	GENE_PROM	4	0.39199	MM686
CHR04FS005512217	AT4G08640	GENE_PROM	4	0.39199	MM686
CHR04FS005512217	AT4G08640	GENE_PROM	4	0.39199	MM686
CHR04FS005568097	AT4G08700	GENE_PROM	4	0.468802	MM686
CHR04FS005568097	AT4G08700	GENE_PROM	4	0.468802	MM686
CHR04FS005568097	AT4G08700	GENE_PROM	4	0.468802	MM686
CHR04FS005568097	AT4G08700	GENE_PROM	4	0.468802	MM686
CHR04FS005568287	AT4G08700	GENE_PROM	2	0.315184	MM240
CHR04FS005568287	AT4G08700	GENE_PROM	2	0.314218	MM330
CHR04FS005591226	AT4G08760	GENE_PROM	4	0.455422	MM686
CHR04FS005591226	AT4G08760	GENE_PROM	4	0.455422	MM686
CHR04FS005591226	AT4G08760	GENE_PROM	4	0.455422	MM686
CHR04FS005591226	AT4G08760	GENE_PROM	4	0.455422	MM686
CHR04FS005629840	AT4G08840	GENE_PROM	1	0.375141	MM25
CHR04FS005629840	AT4G08840	GENE_PROM	1	0.375141	MM25
CHR04FS005629840	AT4G08840	GENE_PROM	1	0.344227	MM91
CHR04FS005629840	AT4G08840	GENE_PROM	1	0.353307	MM123
CHR04FS005629840	AT4G08840	GENE_PROM	1	0.353307	MM123
CHR04FS005629971	AT4G08840	GENE_PROM	5	0.330887	MM862
CHR04FS005629971	AT4G08840	GENE_PROM	5	0.330887	MM862
CHR04FS005629971	AT4G08840	GENE_PROM	5	0.330887	MM862
CHR04FS005630136	AT4G08840	GENE_PROM	2	0.320231	MM240
CHR04FS005630136	AT4G08840	GENE_PROM	3	0.36005	MM399
CHR04FS005630136	AT4G08840	GENE_PROM	5	0.402706	MM865
CHR04FS005630321	AT4G08840	GENE_PROM	5	0.330927	MM859
CHR04FS005658407	AT4G08869	GENE_PROM	1	0.303608	MM123
CHR04FS005658407	AT4G08869	GENE_PROM	1	0.303608	MM123
CHR04FS005658717	AT4G08869	GENE_PROM	1	0.305267	MM25
CHR04FS005658717	AT4G08867	GENE_PROM	1	0.305267	MM25
CHR04FS005658717	AT4G08869	GENE_PROM	1	0.305267	MM25
CHR04FS005658717	AT4G08867	GENE_PROM	1	0.305267	MM25
CHR04FS005658842	AT4G08869	GENE_PROM	4	0.446502	MM686
CHR04FS005658842	AT4G08867	GENE_PROM	4	0.446502	MM686
CHR04FS005658842	AT4G08869	GENE_PROM	4	0.446502	MM686
CHR04FS005658842	AT4G08867	GENE_PROM	4	0.446502	MM686
CHR04FS005658842	AT4G08869	GENE_PROM	4	0.446502	MM686
CHR04FS005658842	AT4G08867	GENE_PROM	4	0.446502	MM686
CHR04FS005658842	AT4G08869	GENE_PROM	4	0.446502	MM686
CHR04FS005658842	AT4G08867	GENE_PROM	4	0.446502	MM686
CHR04FS005668093	AT4G08868	GENE_PROM	4	0.465829	MM686
CHR04FS005668093	AT4G08868	GENE_PROM	4	0.465829	MM686
CHR04FS005668093	AT4G08868	GENE_PROM	4	0.465829	MM686
CHR04FS005668093	AT4G08868	GENE_PROM	4	0.465829	MM686
CHR04FS005668246	AT4G08868	GENE_PROM	1	0.318561	MM91
CHR04FS005668246	AT4G08868	GENE_PROM	1	0.318862	MM123
CHR04FS005668246	AT4G08868	GENE_PROM	1	0.318862	MM123
CHR04FS005673915	AT4G08874	GENE_PROM	1	0.324097	MM91
CHR04FS005673915	AT4G08874	GENE_PROM	4	0.38307	MM686
CHR04FS005673915	AT4G08874	GENE_PROM	4	0.38307	MM686
CHR04FS005673915	AT4G08874	GENE_PROM	4	0.38307	MM686
CHR04FS005673915	AT4G08874	GENE_PROM	4	0.38307	MM686
CHR04FS005696989	AT4G08895	GENE_PROM	1	0.411273	MM5
CHR04FS005696989	AT4G08895	GENE_PROM	1	0.48061	MM10
CHR04FS005696989	AT4G08895	GENE_PROM	1	0.604091	MM25
CHR04FS005696989	AT4G08895	GENE_PROM	1	0.604091	MM25
CHR04FS005696989	AT4G08895	GENE_PROM	1	0.65373	MM91
CHR04FS005696989	AT4G08895	GENE_PROM	1	0.747948	MM123
CHR04FS005696989	AT4G08895	GENE_PROM	1	0.747948	MM123
CHR04FS005697509	AT4G08895	GENE_PROM	2	0.347711	MM240
CHR04FS005697649	AT4G08895	GENE_PROM	2	0.325282	MM330
CHR04FS005752399	AT4G08967	GENE_PROM	4	0.48912	MM686
CHR04FS005752399	AT4G08967	GENE_PROM	4	0.48912	MM686
CHR04FS005752399	AT4G08967	GENE_PROM	4	0.48912	MM686
CHR04FS005752399	AT4G08967	GENE_PROM	4	0.48912	MM686
CHR04FS005827370	AT4G09150	GENE_PROM	4	0.457405	MM686
CHR04FS005827370	AT4G09150	GENE_PROM	4	0.457405	MM686
CHR04FS005827370	AT4G09150	GENE_PROM	4	0.457405	MM686
CHR04FS005827370	AT4G09150	GENE_PROM	4	0.457405	MM686
CHR04FS005870881	AT4G09220	GENE_PROM	1	0.307052	MM123
CHR04FS005870881	AT4G09220	GENE_PROM	1	0.307052	MM123
CHR04FS005871031	AT4G09220	GENE_PROM	4	0.477227	MM686
CHR04FS005871031	AT4G09220	GENE_PROM	4	0.477227	MM686
CHR04FS005871031	AT4G09220	GENE_PROM	4	0.477227	MM686
CHR04FS005871031	AT4G09220	GENE_PROM	4	0.477227	MM686
CHR04FS005888199	AT4G09270	GENE_PROM	1	0.324275	MM123
CHR04FS005888199	AT4G09270	GENE_PROM	1	0.324275	MM123
CHR04FS005888399	AT4G09270	GENE_PROM	4	0.45344	MM686
CHR04FS005888399	AT4G09270	GENE_PROM	4	0.45344	MM686
CHR04FS005888399	AT4G09270	GENE_PROM	4	0.45344	MM686
CHR04FS005888399	AT4G09270	GENE_PROM	4	0.45344	MM686
CHR04FS005969382	AT4G09430	GENE_PROM	1	0.341138	MM123
CHR04FS005969382	AT4G09430	GENE_PROM	1	0.341138	MM123
CHR04FS005969877	AT4G09430	GENE_PROM	1	0.297541	MM91
CHR04FS005970247	AT4G09430	GENE_PROM	1	0.297148	MM25
CHR04FS005970247	AT4G09430	GENE_PROM	1	0.297148	MM25
CHR04FS005970527	AT4G09430	GENE_PROM	4	0.516394	MM686
CHR04FS005970527	AT4G09430	GENE_PROM	4	0.516394	MM686
CHR04FS005970527	AT4G09430	GENE_PROM	4	0.516394	MM686
CHR04FS005970527	AT4G09430	GENE_PROM	4	0.516394	MM686
CHR04FS005991817	AT4G09460	GENE_PROM	1	0.3351	MM123
CHR04FS005991817	AT4G09460	GENE_PROM	1	0.3351	MM123
CHR04FS006061500	AT4G09587	GENE_PROM	4	0.508495	MM686
CHR04FS006061500	AT4G09587	GENE_PROM	4	0.508495	MM686
CHR04FS006061500	AT4G09587	GENE_PROM	4	0.508495	MM686
CHR04FS006061500	AT4G09587	GENE_PROM	4	0.508495	MM686
CHR04FS006061610	AT4G09587	GENE_PROM	1	0.284704	MM25
CHR04FS006061610	AT4G09587	GENE_PROM	1	0.284704	MM25
CHR04FS006099061	AT4G09647	GENE_PROM	4	0.375141	MM686
CHR04FS006099061	AT4G09647	GENE_PROM	4	0.375141	MM686
CHR04FS006099061	AT4G09647	GENE_PROM	4	0.375141	MM686
CHR04FS006099061	AT4G09647	GENE_PROM	4	0.375141	MM686
CHR04FS006156485	AT4G09770	GENE_PROM	1	0.365974	MM25
CHR04FS006156485	AT4G09775	GENE_PROM	1	0.365974	MM25
CHR04FS006156485	AT4G09770	GENE_PROM	1	0.365974	MM25
CHR04FS006156485	AT4G09775	GENE_PROM	1	0.365974	MM25
CHR04FS006156485	AT4G09770	GENE_PROM	1	0.404237	MM123
CHR04FS006156485	AT4G09775	GENE_PROM	1	0.404237	MM123
CHR04FS006156485	AT4G09770	GENE_PROM	1	0.404237	MM123
CHR04FS006156485	AT4G09775	GENE_PROM	1	0.404237	MM123
CHR04FS006156855	AT4G09770	GENE_PROM	2	0.359323	MM168
CHR04FS006156855	AT4G09770	GENE_PROM	2	0.35332	MM240
CHR04FS006156855	AT4G09770	GENE_PROM	2	0.347963	MM330
CHR04FS006156985	AT4G09770	GENE_PROM	1	0.374422	MM91
CHR04FS006157150	AT4G09770	GENE_PROM	4	0.419246	MM686
CHR04FS006157150	AT4G09770	GENE_PROM	4	0.419246	MM686
CHR04FS006157150	AT4G09770	GENE_PROM	4	0.419246	MM686
CHR04FS006157150	AT4G09770	GENE_PROM	4	0.419246	MM686
CHR04FS006198773	AT4G09870	GENE_PROM	1	0.696506	MM91
CHR04FS006198773	AT4G09870	GENE_PROM	1	0.779933	MM123
CHR04FS006198773	AT4G09870	GENE_PROM	1	0.779933	MM123
CHR04FS006199403	AT4G09870	GENE_PROM	1	0.636798	MM25
CHR04FS006199403	AT4G09870	GENE_PROM	1	0.636798	MM25
CHR04FS006199756	AT4G09870	GENE_PROM	1	0.393006	MM5
CHR04FS006199756	AT4G09870	GENE_PROM	1	0.474067	MM10
CHR04FS006199756	AT4G09870	GENE_PROM	2	0.30565	MM240
CHR04FS006214264	AT4G09880	GENE_PROM	1	0.298195	MM123
CHR04FS006214264	AT4G09880	GENE_PROM	1	0.298195	MM123
CHR04FS006214574	AT4G09880	GENE_PROM	4	0.536694	MM686
CHR04FS006214574	AT4G09880	GENE_PROM	4	0.536694	MM686
CHR04FS006214574	AT4G09880	GENE_PROM	4	0.536694	MM686
CHR04FS006214574	AT4G09880	GENE_PROM	4	0.536694	MM686
CHR04FS006468371	AT4G10457	GENE_PROM	1	0.300658	MM123
CHR04FS006468371	AT4G10457	GENE_PROM	1	0.300658	MM123
CHR04FS006468531	AT4G10457	GENE_PROM	4	0.63731	MM686
CHR04FS006468531	AT4G10457	GENE_PROM	4	0.63731	MM686
CHR04FS006468531	AT4G10457	GENE_PROM	4	0.63731	MM686
CHR04FS006468531	AT4G10457	GENE_PROM	4	0.63731	MM686
CHR04FS006472321	AT4G10465	GENE_PROM	4	0.630414	MM686
CHR04FS006472321	AT4G10465	GENE_PROM	4	0.630414	MM686
CHR04FS006472321	AT4G10465	GENE_PROM	4	0.630414	MM686
CHR04FS006472321	AT4G10465	GENE_PROM	4	0.630414	MM686
CHR04FS006582241	AT4G02000	GENE_PROM	4	0.645078	MM587
CHR04FS006582241	AT4G02000	GENE_PROM	4	0.630749	MM654
CHR04FS006582241	AT4G02000	GENE_PROM	4	0.630749	MM654
CHR04FS006582366	AT4G10660	GENE_PROM	4	0.6477	MM686
CHR04FS006582366	AT4G10660	GENE_PROM	4	0.6477	MM686
CHR04FS006582366	AT4G10660	GENE_PROM	4	0.6477	MM686
CHR04FS006582366	AT4G10660	GENE_PROM	4	0.6477	MM686
CHR04FS006583216	AT4G02005	GENE_PROM	4	0.621112	MM587
CHR04FS006583216	AT4G02005	GENE_PROM	4	0.540039	MM654
CHR04FS006583216	AT4G02005	GENE_PROM	4	0.540039	MM654
CHR04FS006583501	AT4G10670	GENE_PROM	4	0.624409	MM686
CHR04FS006583501	AT4G10670	GENE_PROM	4	0.624409	MM686
CHR04FS006583501	AT4G10670	GENE_PROM	4	0.624409	MM686
CHR04FS006583501	AT4G10670	GENE_PROM	4	0.624409	MM686
CHR04FS006723446	AT4G02310	GENE_PROM	4	0.566935	MM654
CHR04FS006723446	AT4G02310	GENE_PROM	4	0.566935	MM654
CHR04FS006723621	AT4G02310	GENE_PROM	4	0.600594	MM587
CHR04FS006885947	AT4G11320	GENE_PROM	2	0.311452	MM330
CHR04FS006886142	AT4G11320	GENE_PROM	2	0.342664	MM240
CHR04FS006886327	AT4G02610	GENE_PROM	4	0.528744	MM587
CHR04FS006886327	AT4G02610	GENE_PROM	4	0.516307	MM654
CHR04FS006886327	AT4G02610	GENE_PROM	4	0.516307	MM654
CHR04FS006919135	AT4G02670	GENE_PROM	4	0.64144	MM587
CHR04FS006919135	AT4G02670	GENE_PROM	4	0.590468	MM654
CHR04FS006919135	AT4G02670	GENE_PROM	4	0.590468	MM654
CHR04FS006919280	AT4G11380	GENE_PROM	1	0.292975	MM123
CHR04FS006919280	AT4G11380	GENE_PROM	1	0.292975	MM123
CHR04FS006977358	AT4G11485	GENE_PROM	1	0.37299	MM123
CHR04FS006977358	AT4G11485	GENE_PROM	1	0.37299	MM123
CHR04FS006977358	AT4G11485	GENE_PROM	2	0.309575	MM240
CHR04FS006977358	AT4G02780	GENE_PROM	4	0.481811	MM587
CHR04FS006977358	AT4G02780	GENE_PROM	4	0.596469	MM654
CHR04FS006977358	AT4G02780	GENE_PROM	4	0.596469	MM654
CHR04FS006977713	AT4G11490	GENE_PROM	1	0.385052	MM25
CHR04FS006977713	AT4G11490	GENE_PROM	1	0.385052	MM25
CHR04FS006977713	AT4G11490	GENE_PROM	1	0.359325	MM91
CHR04FS006977713	AT4G11490	GENE_PROM	1	0.427118	MM123
CHR04FS006977713	AT4G11490	GENE_PROM	1	0.427118	MM123
CHR04FS006977713	AT4G11490	GENE_PROM	2	0.341302	MM168
CHR04FS006977713	AT4G11490	GENE_PROM	2	0.403794	MM240
CHR04FS006977713	AT4G11490	GENE_PROM	2	0.378942	MM330
CHR04FS006977713	AT4G02790	GENE_PROM	4	0.505777	MM587
CHR04FS006977863	AT4G02790	GENE_PROM	4	0.635495	MM654
CHR04FS006977863	AT4G02790	GENE_PROM	4	0.635495	MM654
CHR04FS007945455	AT4G13660	GENE_PROM	1	0.447395	MM10
CHR04FS007945455	AT4G13660	GENE_PROM	1	0.484165	MM25
CHR04FS007945455	AT4G13660	GENE_PROM	1	0.484165	MM25
CHR04FS007945455	AT4G13660	GENE_PROM	1	0.432297	MM91
CHR04FS007945455	AT4G13660	GENE_PROM	1	0.429578	MM123
CHR04FS007945455	AT4G13660	GENE_PROM	1	0.429578	MM123
CHR04FS007945455	AT4G05390	GENE_PROM	4	0.388944	MM587
CHR04FS007945455	AT4G05390	GENE_PROM	4	0.365476	MM654
CHR04FS007945455	AT4G05390	GENE_PROM	4	0.365476	MM654
CHR04FS008319174	AT4G08510	GENE_PROM	4	0.460655	MM587
CHR04FS008319174	AT4G08510	GENE_PROM	4	0.485785	MM654
CHR04FS008319174	AT4G08510	GENE_PROM	4	0.485785	MM654
CHR04FS008620148	AT4G09450	GENE_PROM	4	0.495739	MM654
CHR04FS008620148	AT4G09450	GENE_PROM	4	0.495739	MM654
CHR04FS008620148	AT4G07868	GENE_PROM	4	0.495739	MM654
CHR04FS008620148	AT4G07868	GENE_PROM	4	0.495739	MM654
CHR04FS008620148	AT4G07868	GENE_PROM	4	0.474749	MM665
CHR04FS008620273	AT4G15096	GENE_PROM	1	0.285346	MM91
CHR04FS008620273	AT4G15096	GENE_PROM	1	0.295243	MM123
CHR04FS008620273	AT4G15096	GENE_PROM	1	0.295243	MM123
CHR04FS008620438	AT4G15096	GENE_PROM	1	0.305762	MM25
CHR04FS008620438	AT4G15096	GENE_PROM	1	0.305762	MM25
CHR04FS009072079	AT4G16015	GENE_PROM	1	0.334665	MM91
CHR04FS009072079	AT4G16015	GENE_PROM	1	0.335593	MM123
CHR04FS009072079	AT4G16015	GENE_PROM	1	0.335593	MM123
CHR04FS009072559	AT4G10440	GENE_PROM	4	0.38495	MM587
CHR04FS009072559	AT4G09080	GENE_PROM	4	0.419247	MM665
CHR04FS009072559	AT4G09080	GENE_PROM	4	0.419737	MM666
CHR04FS009072754	AT4G10440	GENE_PROM	4	0.388153	MM654
CHR04FS009072754	AT4G10440	GENE_PROM	4	0.388153	MM654
CHR04FS009072754	AT4G09080	GENE_PROM	4	0.388153	MM654
CHR04FS009072754	AT4G09080	GENE_PROM	4	0.388153	MM654
CHR05FS000029267	AT5G01080	GENE_PROM	1	0.326576	MM25
CHR05FS000029267	AT5G01080	GENE_PROM	1	0.326576	MM25
CHR05FS000029267	AT5G01080	GENE_PROM	1	0.373416	MM91
CHR05FS000029267	AT5G01080	GENE_PROM	1	0.348386	MM123
CHR05FS000029267	AT5G01080	GENE_PROM	1	0.348386	MM123
CHR05FS000029412	AT5G01080	GENE_PROM	1	0.334551	MM5
CHR05FS000029412	AT5G01080	GENE_PROM	1	0.394553	MM10
CHR05FS000250369	AT5G01670	GENE_PROM	1	0.406055	MM5
CHR05FS000250369	AT5G01670	GENE_PROM	1	0.638038	MM25
CHR05FS000250369	AT5G01670	GENE_PROM	1	0.638038	MM25
CHR05FS000250369	AT5G01670	GENE_PROM	4	0.354401	MM654
CHR05FS000250369	AT5G01670	GENE_PROM	4	0.354401	MM654
CHR05FS000250369	AT5G01670	GENE_PROM	4	0.354401	MM654
CHR05FS000250369	AT5G01670	GENE_PROM	4	0.354401	MM654
CHR05FS000250519	AT5G01670	GENE_PROM	1	0.346763	MM1
CHR05FS000250519	AT5G01670	GENE_PROM	1	0.538987	MM10
CHR05FS000250680	AT5G01670	GENE_PROM	1	0.615985	MM91
CHR05FS000250680	AT5G01670	GENE_PROM	1	0.607216	MM123
CHR05FS000250680	AT5G01670	GENE_PROM	1	0.607216	MM123
CHR05FS000250970	AT5G01670	GENE_PROM	4	0.317546	MM587
CHR05FS001066251	AT5G03944	GENE_PROM	1	0.440501	MM5
CHR05FS001066251	AT5G03944	GENE_PROM	1	0.510302	MM10
CHR05FS001066251	AT5G03944	GENE_PROM	1	0.631347	MM25
CHR05FS001066251	AT5G03944	GENE_PROM	1	0.631347	MM25
CHR05FS001066251	AT5G03944	GENE_PROM	1	0.684931	MM91
CHR05FS001066251	AT5G03944	GENE_PROM	1	0.762218	MM123
CHR05FS001066251	AT5G03944	GENE_PROM	1	0.762218	MM123
CHR05FS001066251	AT5G03944	GENE_PROM	4	0.339634	MM654
CHR05FS001066251	AT5G03944	GENE_PROM	4	0.339634	MM654
CHR05FS001066251	AT5G03944	GENE_PROM	4	0.339634	MM654
CHR05FS001066251	AT5G03944	GENE_PROM	4	0.339634	MM654
CHR05FS001230293	AT5G04370	GENE_PROM	4	-0.306409	MM654
CHR05FS001230293	AT5G04370	GENE_PROM	4	-0.306409	MM654
CHR05FS001230293	AT5G04370	GENE_PROM	4	-0.306409	MM654
CHR05FS001230293	AT5G04370	GENE_PROM	4	-0.306409	MM654
CHR05FS001230293	AT5G04370	GENE_PROM	4	-0.336487	MM665
CHR05FS001230293	AT5G04370	GENE_PROM	4	-0.328704	MM666
CHR05FS001230458	AT5G04370	GENE_PROM	4	-0.348381	MM686
CHR05FS001230458	AT5G04370	GENE_PROM	4	-0.348381	MM686
CHR05FS001230458	AT5G04370	GENE_PROM	4	-0.348381	MM686
CHR05FS001230458	AT5G04370	GENE_PROM	4	-0.348381	MM686
CHR05FS003945007	AT5G12200	GENE_PROM	4	0.774564	MM665
CHR05FS003945007	AT5G12200	GENE_PROM	4	0.792235	MM666
CHR05FS003945160	AT5G12200	GENE_PROM	4	0.709985	MM587
CHR05FS003945160	AT5G12200	GENE_PROM	4	0.647625	MM654
CHR05FS003945160	AT5G12200	GENE_PROM	4	0.647625	MM654
CHR05FS003945160	AT5G12200	GENE_PROM	4	0.647625	MM654
CHR05FS003945160	AT5G12200	GENE_PROM	4	0.647625	MM654
CHR05FS003945355	AT5G12200	GENE_PROM	1	0.325585	MM25
CHR05FS003945355	AT5G12200	GENE_PROM	1	0.325585	MM25
CHR05FS003945355	AT5G12200	GENE_PROM	1	0.281823	MM91
CHR05FS003945355	AT5G12200	GENE_PROM	1	0.339037	MM123
CHR05FS003945355	AT5G12200	GENE_PROM	1	0.339037	MM123
CHR05FS003946029	AT5G12210	GENE_PROM	4	0.643407	MM654
CHR05FS003946029	AT5G12210	GENE_PROM	4	0.643407	MM654
CHR05FS003946029	AT5G12210	GENE_PROM	4	0.643407	MM654
CHR05FS003946029	AT5G12210	GENE_PROM	4	0.643407	MM654
CHR05FS003946029	AT5G12210	GENE_PROM	4	0.760194	MM665
CHR05FS003946029	AT5G12210	GENE_PROM	4	0.77649	MM666
CHR05FS003946029	AT5G12200	GENE_PROM	4	0.515882	MM686
CHR05FS003946029	AT5G12210	GENE_PROM	4	0.515882	MM686
CHR05FS003946029	AT5G12200	GENE_PROM	4	0.515882	MM686
CHR05FS003946029	AT5G12210	GENE_PROM	4	0.515882	MM686
CHR05FS003946029	AT5G12200	GENE_PROM	4	0.515882	MM686
CHR05FS003946029	AT5G12210	GENE_PROM	4	0.515882	MM686
CHR05FS003946029	AT5G12200	GENE_PROM	4	0.515882	MM686
CHR05FS003946029	AT5G12210	GENE_PROM	4	0.515882	MM686
CHR05FS003946149	AT5G12210	GENE_PROM	1	0.325585	MM25
CHR05FS003946149	AT5G12210	GENE_PROM	1	0.325585	MM25
CHR05FS003946149	AT5G12210	GENE_PROM	4	0.674037	MM587
CHR05FS003946484	AT5G12210	GENE_PROM	1	0.323291	MM123
CHR05FS003946484	AT5G12210	GENE_PROM	1	0.323291	MM123
CHR05FS005630630	AT5G17120	GENE_PROM	1	0.463847	MM25
CHR05FS005630630	AT5G17120	GENE_PROM	1	0.463847	MM25
CHR05FS005630630	AT5G17120	GENE_PROM	1	0.375429	MM91
CHR05FS005630630	AT5G17120	GENE_PROM	1	0.418753	MM123
CHR05FS005630630	AT5G17120	GENE_PROM	1	0.418753	MM123
CHR05FS005635419	AT5G17130	GENE_PROM	5	0.456456	MM823
CHR05FS005635419	AT5G17130	GENE_PROM	5	0.426291	MM854
CHR05FS005643880	AT5G17160	GENE_PROM	5	0.490171	MM823
CHR05FS005643880	AT5G17160	GENE_PROM	5	0.410557	MM854
CHR05FS005643880	AT5G17160	GENE_PROM	5	0.353881	MM862
CHR05FS005643880	AT5G17160	GENE_PROM	5	0.353881	MM862
CHR05FS005643880	AT5G17160	GENE_PROM	5	0.353881	MM862
CHR05FS005644005	AT5G17160	GENE_PROM	5	0.346763	MM859
CHR05FS007027710	AT5G20740	GENE_PROM	5	0.538447	MM854
CHR05FS007027905	AT5G20740	GENE_PROM	5	0.346599	MM865
CHR05FS007027905	AT5G20740	GENE_PROM	5	0.528002	MM823
CHR05FS007027905	AT5G20740	GENE_PROM	5	0.432296	MM859
CHR05FS007027905	AT5G20740	GENE_PROM	5	0.431626	MM862
CHR05FS007027905	AT5G20740	GENE_PROM	5	0.431626	MM862
CHR05FS007027905	AT5G20740	GENE_PROM	5	0.431626	MM862
CHR05FS007829151	AT5G23240	GENE_PROM	5	0.437022	MM859
CHR05FS007829151	AT5G23250	GENE_PROM	5	0.437022	MM859
CHR05FS007829266	AT5G23240	GENE_PROM	5	0.4352	MM862
CHR05FS007829266	AT5G23250	GENE_PROM	5	0.4352	MM862
CHR05FS007829266	AT5G23240	GENE_PROM	5	0.4352	MM862
CHR05FS007829266	AT5G23250	GENE_PROM	5	0.4352	MM862
CHR05FS007829266	AT5G23240	GENE_PROM	5	0.4352	MM862
CHR05FS007829266	AT5G23250	GENE_PROM	5	0.4352	MM862
CHR05FS007829759	AT5G23240	GENE_PROM	1	0.388514	MM10
CHR05FS007829759	AT5G23250	GENE_PROM	1	0.388514	MM10
CHR05FS007829759	AT5G23240	GENE_PROM	1	0.401901	MM25
CHR05FS007829759	AT5G23250	GENE_PROM	1	0.401901	MM25
CHR05FS007829759	AT5G23240	GENE_PROM	1	0.401901	MM25
CHR05FS007829759	AT5G23250	GENE_PROM	1	0.401901	MM25
CHR05FS007829759	AT5G23240	GENE_PROM	1	0.36939	MM91
CHR05FS007829759	AT5G23250	GENE_PROM	1	0.36939	MM91
CHR05FS007829759	AT5G23240	GENE_PROM	1	0.33018	MM123
CHR05FS007829759	AT5G23250	GENE_PROM	1	0.33018	MM123
CHR05FS007829759	AT5G23240	GENE_PROM	1	0.33018	MM123
CHR05FS007829759	AT5G23250	GENE_PROM	1	0.33018	MM123
CHR05FS008365048	AT5G24480	GENE_PROM	5	0.467448	MM859
CHR05FS008365048	AT5G24480	GENE_PROM	5	0.449222	MM862
CHR05FS008365048	AT5G24480	GENE_PROM	5	0.449222	MM862
CHR05FS008365048	AT5G24480	GENE_PROM	5	0.449222	MM862
CHR05FS008400989	AT5G24560	GENE_PROM	5	0.44342	MM859
CHR05FS008400989	AT5G24560	GENE_PROM	5	0.422301	MM862
CHR05FS008400989	AT5G24560	GENE_PROM	5	0.422301	MM862
CHR05FS008400989	AT5G24560	GENE_PROM	5	0.422301	MM862
CHR05FS008667136	AT5G25130	GENE_PROM	5	0.447827	MM862
CHR05FS008667136	AT5G25130	GENE_PROM	5	0.447827	MM862
CHR05FS008667136	AT5G25130	GENE_PROM	5	0.447827	MM862
CHR05FS008667301	AT5G25130	GENE_PROM	5	0.445483	MM859
CHR05FS009021098	AT5G25870	GENE_PROM	1	0.4791	MM10
CHR05FS009021223	AT5G25870	GENE_PROM	1	0.688454	MM91
CHR05FS009021223	AT5G25870	GENE_PROM	1	0.77206	MM123
CHR05FS009021223	AT5G25870	GENE_PROM	1	0.77206	MM123
CHR05FS009021381	AT5G25870	GENE_PROM	1	0.636302	MM25
CHR05FS009021381	AT5G25870	GENE_PROM	1	0.636302	MM25
CHR05FS009021741	AT5G25870	GENE_PROM	4	0.399755	MM654
CHR05FS009021741	AT5G25870	GENE_PROM	4	0.399755	MM654
CHR05FS009021741	AT5G25870	GENE_PROM	4	0.399755	MM654
CHR05FS009021741	AT5G25870	GENE_PROM	4	0.399755	MM654
CHR05FS009021741	AT5G25870	GENE_PROM	4	0.30824	MM665
CHR05FS009021741	AT5G25870	GENE_PROM	4	0.321322	MM666
CHR05FS009049264	AT5G25930	GENE_PROM	1	0.396566	MM10
CHR05FS009049264	AT5G25930	GENE_PROM	1	0.513403	MM25
CHR05FS009049264	AT5G25930	GENE_PROM	1	0.513403	MM25
CHR05FS009049803	AT5G25930	GENE_PROM	1	0.49923	MM91
CHR05FS009049803	AT5G25930	GENE_PROM	1	0.500436	MM123
CHR05FS009049803	AT5G25930	GENE_PROM	1	0.500436	MM123
CHR05FS009056525	AT5G25940	GENE_PROM	5	0.43359	MM859
CHR05FS009056525	AT5G25940	GENE_PROM	5	0.427909	MM862
CHR05FS009056525	AT5G25940	GENE_PROM	5	0.427909	MM862
CHR05FS009056525	AT5G25940	GENE_PROM	5	0.427909	MM862
CHR05FS009102079	AT5G26040	GENE_PROM	1	0.37787	MM5
CHR05FS009102079	AT5G26040	GENE_PROM	1	0.482623	MM10
CHR05FS009102392	AT5G26040	GENE_PROM	1	0.582782	MM25
CHR05FS009102392	AT5G26040	GENE_PROM	1	0.582782	MM25
CHR05FS009102392	AT5G26040	GENE_PROM	1	0.507785	MM91
CHR05FS009102392	AT5G26040	GENE_PROM	1	0.477309	MM123
CHR05FS009102392	AT5G26040	GENE_PROM	1	0.477309	MM123
CHR05FS009203876	AT5G26262	GENE_PROM	5	0.523811	MM862
CHR05FS009203876	AT5G26262	GENE_PROM	5	0.523811	MM862
CHR05FS009203876	AT5G26262	GENE_PROM	5	0.523811	MM862
CHR05FS009207174	AT5G26280	GENE_PROM	5	0.555095	MM859
CHR05FS009207174	AT5G26280	GENE_PROM	5	0.534747	MM862
CHR05FS009207174	AT5G26280	GENE_PROM	5	0.534747	MM862
CHR05FS009207174	AT5G26280	GENE_PROM	5	0.534747	MM862
CHR05FS009281945	AT5G26692	GENE_PROM	3	0.364693	MM427
CHR05FS009282110	AT5G26692	GENE_PROM	3	0.374624	MM432
CHR05FS009545314	AT5G27130	GENE_PROM	5	0.332565	MM859
CHR05FS009545468	AT5G27130	GENE_PROM	5	0.314623	MM862
CHR05FS009545468	AT5G27130	GENE_PROM	5	0.314623	MM862
CHR05FS009545468	AT5G27130	GENE_PROM	5	0.314623	MM862
CHR05FS009565936	AT5G27170	GENE_PROM	5	0.558097	MM859
CHR05FS009565936	AT5G27170	GENE_PROM	5	0.550169	MM862
CHR05FS009565936	AT5G27170	GENE_PROM	5	0.550169	MM862
CHR05FS009565936	AT5G27170	GENE_PROM	5	0.550169	MM862
CHR05FS009570170	AT5G27200	GENE_PROM	4	0.499286	MM587
CHR05FS009570390	AT5G27200	GENE_PROM	4	0.490994	MM654
CHR05FS009570390	AT5G27200	GENE_PROM	4	0.490994	MM654
CHR05FS009570390	AT5G27200	GENE_PROM	4	0.490994	MM654
CHR05FS009570390	AT5G27200	GENE_PROM	4	0.490994	MM654
CHR05FS009570390	AT5G27200	GENE_PROM	4	0.487635	MM665
CHR05FS009570390	AT5G27200	GENE_PROM	4	0.470914	MM666
CHR05FS009570390	AT5G27200	GENE_PROM	4	0.364735	MM686
CHR05FS009570390	AT5G27200	GENE_PROM	4	0.364735	MM686
CHR05FS009570390	AT5G27200	GENE_PROM	4	0.364735	MM686
CHR05FS009570390	AT5G27200	GENE_PROM	4	0.364735	MM686
CHR05FS009570525	AT5G27200	GENE_PROM	1	0.352345	MM25
CHR05FS009570525	AT5G27200	GENE_PROM	1	0.352345	MM25
CHR05FS009570525	AT5G27200	GENE_PROM	1	0.372409	MM91
CHR05FS009570525	AT5G27200	GENE_PROM	1	0.458118	MM123
CHR05FS009570525	AT5G27200	GENE_PROM	1	0.458118	MM123
CHR05FS009705334	AT5G27490	GENE_PROM	5	0.489291	MM859
CHR05FS009705334	AT5G27495	GENE_PROM	5	0.489291	MM859
CHR05FS009705334	AT5G27490	GENE_PROM	5	0.522689	MM862
CHR05FS009705334	AT5G27495	GENE_PROM	5	0.522689	MM862
CHR05FS009705334	AT5G27490	GENE_PROM	5	0.522689	MM862
CHR05FS009705334	AT5G27495	GENE_PROM	5	0.522689	MM862
CHR05FS009705334	AT5G27490	GENE_PROM	5	0.522689	MM862
CHR05FS009705334	AT5G27495	GENE_PROM	5	0.522689	MM862
CHR05FS009712402	AT5G27510	GENE_PROM	5	0.57721	MM859
CHR05FS009712402	AT5G27510	GENE_PROM	5	0.560825	MM862
CHR05FS009712402	AT5G27510	GENE_PROM	5	0.560825	MM862
CHR05FS009712402	AT5G27510	GENE_PROM	5	0.560825	MM862
CHR05FS009741823	AT5G27600	GENE_PROM	1	0.416696	MM10
CHR05FS009741938	AT5G27600	GENE_PROM	1	0.371607	MM5
CHR05FS009741938	AT5G27600	GENE_PROM	1	0.593189	MM25
CHR05FS009741938	AT5G27600	GENE_PROM	1	0.593189	MM25
CHR05FS009741938	AT5G27600	GENE_PROM	1	0.659769	MM91
CHR05FS009741938	AT5G27600	GENE_PROM	1	0.720884	MM123
CHR05FS009741938	AT5G27600	GENE_PROM	1	0.720884	MM123
CHR05FS009841805	AT5G27800	GENE_PROM	5	0.580454	MM862
CHR05FS009841805	AT5G27800	GENE_PROM	5	0.580454	MM862
CHR05FS009841805	AT5G27800	GENE_PROM	5	0.580454	MM862
CHR05FS009843257	AT5G27790	GENE_PROM	5	0.575305	MM859
CHR05FS009982566	AT5G27950	GENE_PROM	5	0.524372	MM862
CHR05FS009982566	AT5G27950	GENE_PROM	5	0.524372	MM862
CHR05FS009982566	AT5G27950	GENE_PROM	5	0.524372	MM862
CHR05FS009982666	AT5G27950	GENE_PROM	5	0.535709	MM859
CHR05FS010051503	AT5G28052	GENE_PROM	5	0.598683	MM862
CHR05FS010051503	AT5G28052	GENE_PROM	5	0.598683	MM862
CHR05FS010051503	AT5G28052	GENE_PROM	5	0.598683	MM862
CHR05FS010082822	AT5G28070	GENE_PROM	5	0.585402	MM859
CHR05FS010082822	AT5G28070	GENE_PROM	5	0.59055	MM862
CHR05FS010082822	AT5G28070	GENE_PROM	5	0.59055	MM862
CHR05FS010082822	AT5G28070	GENE_PROM	5	0.59055	MM862
CHR05FS010100538	AT5G28090	GENE_PROM	5	0.614856	MM862
CHR05FS010100538	AT5G28090	GENE_PROM	5	0.614856	MM862
CHR05FS010100538	AT5G28090	GENE_PROM	5	0.614856	MM862
CHR05FS010204612	AT5G28235	GENE_PROM	5	0.709909	MM859
CHR05FS010204757	AT5G28235	GENE_PROM	5	0.705518	MM862
CHR05FS010204757	AT5G28235	GENE_PROM	5	0.705518	MM862
CHR05FS010204757	AT5G28235	GENE_PROM	5	0.705518	MM862
CHR05FS010237656	AT5G28262	GENE_PROM	1	0.354291	MM123
CHR05FS010237656	AT5G28262	GENE_PROM	1	0.354291	MM123
CHR05FS010237656	AT5G28262	GENE_PROM	5	0.486014	MM859
CHR05FS010237656	AT5G28262	GENE_PROM	5	0.499134	MM862
CHR05FS010237656	AT5G28262	GENE_PROM	5	0.499134	MM862
CHR05FS010237656	AT5G28262	GENE_PROM	5	0.499134	MM862
CHR05FS010312706	AT5G28340	GENE_PROM	3	0.402278	MM427
CHR05FS010312706	AT5G28340	GENE_PROM	3	0.433775	MM432
CHR05FS010312706	AT5G28340	GENE_PROM	5	0.467994	MM859
CHR05FS010312831	AT5G28340	GENE_PROM	5	0.450342	MM862
CHR05FS010312831	AT5G28340	GENE_PROM	5	0.450342	MM862
CHR05FS010312831	AT5G28340	GENE_PROM	5	0.450342	MM862
CHR05FS010331014	AT5G28360	GENE_PROM	2	0.487653	MM168
CHR05FS010331014	AT5G28360	GENE_PROM	2	0.438565	MM240
CHR05FS010331014	AT5G28360	GENE_PROM	2	0.422645	MM330
CHR05FS010331014	AT5G28360	GENE_PROM	5	0.382483	MM862
CHR05FS010331014	AT5G28360	GENE_PROM	5	0.382483	MM862
CHR05FS010331014	AT5G28360	GENE_PROM	5	0.382483	MM862
CHR05FS010331184	AT5G28360	GENE_PROM	5	0.374341	MM859
CHR05FS010335308	AT5G28370	GENE_PROM	5	0.52424	MM859
CHR05FS010335498	AT5G28370	GENE_PROM	5	0.570359	MM862
CHR05FS010335498	AT5G28370	GENE_PROM	5	0.570359	MM862
CHR05FS010335498	AT5G28370	GENE_PROM	5	0.570359	MM862
CHR05FS010374386	AT5G28450	GENE_PROM	5	0.555095	MM859
CHR05FS010374386	AT5G28450	GENE_PROM	5	0.565032	MM862
CHR05FS010374386	AT5G28450	GENE_PROM	5	0.565032	MM862
CHR05FS010374386	AT5G28450	GENE_PROM	5	0.565032	MM862
CHR05FS010398685	AT5G28465	GENE_PROM	5	0.570931	MM859
CHR05FS010398685	AT5G28465	GENE_PROM	5	0.571201	MM862
CHR05FS010398685	AT5G28465	GENE_PROM	5	0.571201	MM862
CHR05FS010398685	AT5G28465	GENE_PROM	5	0.571201	MM862
CHR05FS010476684	AT5G28500	GENE_PROM	5	0.400279	MM859
CHR05FS010476859	AT5G28500	GENE_PROM	5	0.430153	MM862
CHR05FS010476859	AT5G28500	GENE_PROM	5	0.430153	MM862
CHR05FS010476859	AT5G28500	GENE_PROM	5	0.430153	MM862
CHR05FS010477066	AT5G28500	GENE_PROM	1	0.327116	MM10
CHR05FS010477066	AT5G28500	GENE_PROM	1	0.286435	MM25
CHR05FS010477066	AT5G28500	GENE_PROM	1	0.286435	MM25
CHR05FS010477066	AT5G28500	GENE_PROM	1	0.299671	MM123
CHR05FS010477066	AT5G28500	GENE_PROM	1	0.299671	MM123
CHR05FS010492035	AT5G28520	GENE_PROM	5	0.308454	MM862
CHR05FS010492035	AT5G28520	GENE_PROM	5	0.308454	MM862
CHR05FS010492035	AT5G28520	GENE_PROM	5	0.308454	MM862
CHR05FS010492250	AT5G28520	GENE_PROM	1	0.308736	MM25
CHR05FS010492250	AT5G28520	GENE_PROM	1	0.308736	MM25
CHR05FS010492375	AT5G28520	GENE_PROM	1	0.334162	MM91
CHR05FS010492375	AT5G28520	GENE_PROM	1	0.396117	MM123
CHR05FS010492375	AT5G28520	GENE_PROM	1	0.396117	MM123
CHR05FS010559887	AT5G28550	GENE_PROM	5	0.42174	MM862
CHR05FS010559887	AT5G28550	GENE_PROM	5	0.42174	MM862
CHR05FS010559887	AT5G28550	GENE_PROM	5	0.42174	MM862
CHR05FS010774892	AT5G28720	GENE_PROM	5	0.592501	MM859
CHR05FS010775032	AT5G28720	GENE_PROM	5	0.594474	MM862
CHR05FS010775032	AT5G28720	GENE_PROM	5	0.594474	MM862
CHR05FS010775032	AT5G28720	GENE_PROM	5	0.594474	MM862
CHR05FS010813304	AT5G28781	GENE_PROM	5	0.489291	MM859
CHR05FS010813304	AT5G28781	GENE_PROM	5	0.487918	MM862
CHR05FS010813304	AT5G28781	GENE_PROM	5	0.487918	MM862
CHR05FS010813304	AT5G28781	GENE_PROM	5	0.487918	MM862
CHR05FS010823897	AT5G28810	GENE_PROM	5	0.650932	MM859
CHR05FS010823897	AT5G28810	GENE_PROM	5	0.67299	MM862
CHR05FS010823897	AT5G28810	GENE_PROM	5	0.67299	MM862
CHR05FS010823897	AT5G28810	GENE_PROM	5	0.67299	MM862
CHR05FS010846487	AT5G28824	GENE_PROM	5	0.543353	MM859
CHR05FS010846487	AT5G28824	GENE_PROM	5	0.58438	MM862
CHR05FS010846487	AT5G28824	GENE_PROM	5	0.58438	MM862
CHR05FS010846487	AT5G28824	GENE_PROM	5	0.58438	MM862
CHR05FS010846627	AT5G28824	GENE_PROM	1	0.32762	MM10
CHR05FS010846627	AT5G28824	GENE_PROM	1	0.363743	MM25
CHR05FS010846627	AT5G28824	GENE_PROM	1	0.363743	MM25
CHR05FS010846627	AT5G28824	GENE_PROM	1	0.405121	MM91
CHR05FS010846627	AT5G28824	GENE_PROM	1	0.455658	MM123
CHR05FS010846627	AT5G28824	GENE_PROM	1	0.455658	MM123
CHR05FS010846822	AT5G28824	GENE_PROM	4	0.330028	MM587
CHR05FS010895344	AT5G28885	GENE_PROM	5	0.50895	MM859
CHR05FS010895344	AT5G28885	GENE_PROM	5	0.519885	MM862
CHR05FS010895344	AT5G28885	GENE_PROM	5	0.519885	MM862
CHR05FS010895344	AT5G28885	GENE_PROM	5	0.519885	MM862
CHR05FS010995476	AT5G28960	GENE_PROM	5	0.464171	MM859
CHR05FS010995476	AT5G28960	GENE_PROM	5	0.473897	MM862
CHR05FS010995476	AT5G28960	GENE_PROM	5	0.473897	MM862
CHR05FS010995476	AT5G28960	GENE_PROM	5	0.473897	MM862
CHR05FS011133603	AT5G29070	GENE_PROM	5	0.587586	MM859
CHR05FS011133603	AT5G29070	GENE_PROM	5	0.596718	MM862
CHR05FS011133603	AT5G29070	GENE_PROM	5	0.596718	MM862
CHR05FS011133603	AT5G29070	GENE_PROM	5	0.596718	MM862
CHR05FS011133913	AT5G29070	GENE_PROM	1	0.290322	MM123
CHR05FS011133913	AT5G29070	GENE_PROM	1	0.290322	MM123
CHR05FS011155350	AT5G29210	GENE_PROM	5	0.392634	MM859
CHR05FS011155350	AT5G29210	GENE_PROM	5	0.36678	MM862
CHR05FS011155350	AT5G29210	GENE_PROM	5	0.36678	MM862
CHR05FS011155350	AT5G29210	GENE_PROM	5	0.36678	MM862
CHR05FS011155685	AT5G29231	GENE_PROM	5	0.448881	MM859
CHR05FS011155685	AT5G29231	GENE_PROM	5	0.499134	MM862
CHR05FS011155685	AT5G29231	GENE_PROM	5	0.499134	MM862
CHR05FS011155685	AT5G29231	GENE_PROM	5	0.499134	MM862
CHR05FS011193324	AT5G29560	GENE_PROM	5	0.57448	MM859
CHR05FS011193324	AT5G29560	GENE_PROM	5	0.569798	MM862
CHR05FS011193324	AT5G29560	GENE_PROM	5	0.569798	MM862
CHR05FS011193324	AT5G29560	GENE_PROM	5	0.569798	MM862
CHR05FS012253099	AT5G32597	GENE_PROM	5	0.449427	MM859
CHR05FS012482934	AT5G33210	GENE_PROM	5	0.594474	MM862
CHR05FS012482934	AT5G33210	GENE_PROM	5	0.594474	MM862
CHR05FS012482934	AT5G33210	GENE_PROM	5	0.594474	MM862
CHR05FS012484128	AT5G33210	GENE_PROM	1	0.313449	MM123
CHR05FS012484128	AT5G33210	GENE_PROM	1	0.313449	MM123
CHR05FS012484128	AT5G33210	GENE_PROM	4	0.396433	MM587
CHR05FS012484398	AT5G33210	GENE_PROM	1	0.292392	MM91
CHR05FS012722334	AT5G33421	GENE_PROM	5	0.587586	MM859
CHR05FS012722534	AT5G33421	GENE_PROM	5	0.593634	MM862
CHR05FS012722534	AT5G33421	GENE_PROM	5	0.593634	MM862
CHR05FS012722534	AT5G33421	GENE_PROM	5	0.593634	MM862
CHR05FS012803400	AT5G33898	GENE_PROM	5	0.563558	MM859
CHR05FS012803400	AT5G33898	GENE_PROM	5	0.574846	MM862
CHR05FS012803400	AT5G33898	GENE_PROM	5	0.574846	MM862
CHR05FS012803400	AT5G33898	GENE_PROM	5	0.574846	MM862
CHR05FS012982396	AT5G34780	GENE_PROM	5	0.618049	MM862
CHR05FS012982396	AT5G34780	GENE_PROM	5	0.618049	MM862
CHR05FS012982396	AT5G34780	GENE_PROM	5	0.618049	MM862
CHR05FS012982535	AT5G34780	GENE_PROM	5	0.573389	MM859
CHR05FS012997383	AT5G34830	GENE_PROM	1	0.371022	MM123
CHR05FS012997383	AT5G34830	GENE_PROM	1	0.371022	MM123
CHR05FS012997568	AT5G34830	GENE_PROM	4	0.301135	MM654
CHR05FS012997568	AT5G34830	GENE_PROM	4	0.301135	MM654
CHR05FS012997568	AT5G34830	GENE_PROM	4	0.301135	MM654
CHR05FS012997568	AT5G34830	GENE_PROM	4	0.301135	MM654
CHR05FS012997918	AT5G34830	GENE_PROM	4	0.33552	MM587
CHR05FS012998388	AT5G34830	GENE_PROM	1	0.313025	MM91
CHR05FS013001215	AT5G34829	GENE_PROM	5	0.55993	MM859
CHR05FS013001215	AT5G34829	GENE_PROM	5	0.564376	MM862
CHR05FS013001215	AT5G34829	GENE_PROM	5	0.564376	MM862
CHR05FS013001215	AT5G34829	GENE_PROM	5	0.564376	MM862
CHR05FS013211924	AT5G34882	GENE_PROM	5	0.59167	MM862
CHR05FS013211924	AT5G34882	GENE_PROM	5	0.59167	MM862
CHR05FS013211924	AT5G34882	GENE_PROM	5	0.59167	MM862
CHR05FS013212229	AT5G34882	GENE_PROM	5	0.581033	MM859
CHR05FS013430510	AT5G35160	GENE_PROM	5	0.55073	MM862
CHR05FS013430510	AT5G35160	GENE_PROM	5	0.55073	MM862
CHR05FS013430510	AT5G35160	GENE_PROM	5	0.55073	MM862
CHR05FS013431005	AT5G35160	GENE_PROM	5	0.546083	MM859

## Sheet: Supplemental table 9
Supplemental table 8. A list of artsRNAs, predicted to mediate transcriptional silencing, in the trans-QTLepi interval of the eQTLepi. One such sRNA was detected for MED8 and 504 for AT3G24360. Abbreviations used: Q_NAME, query gene name; Q_CHR, query chromosome; Q_START, query start bp; Q_STOP, query stop bp; Q_STR, query strand; T_NAME, target QTL peak marker name; T_CHR, target chromosome; T_S…
Q_NAME	Q_CHR	Q_START	Q_STOP	Q_STR	T_NAME	T_CHR	T_START	T_STOP	LENGTH	SEQUENCE	Q_TEorREP	T_TEorREP	Q_GP	T_GP	Q_GB	T_GB	Q_DMR	T_DMR	Q_Rev	T_Rev	ArtsRNA	ArtsRNA_STA	ArtsRNA_len	ArtsRNA_Slotkin_WT	ArtsRNA_Slotkin_ddm1	AGO_bound	AGO1	AGO2	AGO4	AGO5	AGO6	AGO7	AGO9	AGO10	Function
AT2G03070	2	904891	904913	+	MM25	1	14001216	14001238	23	TATACTATTTACGTATACCTTGT	N	N	Y	N	N	N	Y	Y	N	Y	ATACTATTTACGTATACCTTGT	904892	22	N	N	Y	0.286	0.857	0.286	0.571	1	0.143	0.286	0.571	TS
AT3G24360	3	8842998	8843074	+	MM123	1	9004843	9004919	77	CCGTTGACCATGTTTTATTTCCATGGATTGTCAAAGTCAAATGTGGTTTTCACCATTTGTCTTTTCGCCTGCAAAAT	Y	Y	Y	Y	N	N	Y	Y	Y	Y	GTCAAAGTCAAATGTGGTTTTCAC	8843027	24	N	N	Y	0.714	0.429	0.857	0.286	0	0.429	0.429	0.857	TS
AT3G24360	3	8843076	8843276	+	MM123	1	9004921	9005121	201	ACGCTTCTGCCCTTGCGCTTCTCTCTTAGCAACTGTTGAAATGTACGGTTTAGTTTAGCAGGTTTAGTTACGTACACTGTTCCGGTTCAGTTGAAGATTTTTTGTTCACGTTGACGCGATTCGGTTCCGTTACAAGTGAGATTATTCCGAAGTGACATCAACATTTAATGCCCCCAAAAAGTTTAGATGTGACTATTGTCA	Y	Y	Y	Y	N	N	Y	Y	Y	Y	AAATGTACGGTTTAGTTTAGCA	8843114	22	Y	N	Y	0	0.857	0.429	0.286	1	0.286	0.714	0.429	TS
AT3G24360	3	8843232	8843319	+	MM123	1	12713720	12713807	88	ATCAACATTTAATGCCCCCAAAAAGTTTAGATGTGACTATTGTCACAATTAATGCAAAATCATCATTACATCAAATAATATTAAAAAA	Y	Y	Y	N	N	N	Y	Y	Y	Y	ATGCAAAATCATCATTACATCA	8843283	22	N	N	Y	0.143	0.571	0.429	0.429	1	0	0.571	0.857	TS
AT3G24360	3	8843278	8843302	+	MM123	1	11752576	11752600	25	AATTAATGCAAAATCATCATTACAT	Y	Y	Y	Y	N	N	Y	Y	Y	Y	AATTAATGCAAAATCATCATTAC	8843278	23	N	N	Y	0.143	0.286	0.571	0.143	1	0.286	0.714	0.857	TS
AT3G24360	3	8843287	8843334	+	MM123	1	9005132	9005179	48	AAAATCATCATTACATCAAATAATATTAAAAAAATTATTAATAATAAT	Y	Y	Y	Y	N	N	Y	Y	Y	Y	AAATCATCATTACATCAAATAAT	8843288	23	N	N	Y	0.143	0.286	0.571	0.429	1	0.143	0.714	0.714	TS
AT3G24360	3	8843336	8843367	+	MM123	1	12713823	12713854	32	AAAAAAAAATTTGTTGAGATAAAGAAGATGAA	Y	Y	Y	N	N	N	Y	Y	Y	Y	AATTTGTTGAGATAAAGAAGA	8843343	21	N	N	Y	0.286	0.714	0.571	0.429	0.857	0	0.429	0.714	TS
AT3G24360	3	8843345	8843388	+	MM123	1	9005190	9005233	44	TTTGTTGAGATAAAGAAGATGAACCCAGGAACAAAGAATTATTG	Y	Y	Y	Y	N	N	Y	Y	Y	Y	ATAAAGAAGATGAACCCAGGA	8843354	21	N	N	Y	0.429	0.714	0.571	0.286	1	0	0.714	0.286	TS
AT3G24360	3	8843369	8843488	+	MM123	1	12713856	12713975	120	CCAGGAACAAAGAATTATTGCGAACGTACATTGCTGCTGAAGAAGTGTTGATCTTGTTTTTGTACCAAGTTTGGAGCATTGCTCGTGTAAGTAATGAAGTTCTTTTAAGAAGTTTTTTTT	Y	Y	Y	N	N	N	Y	Y	Y	Y	AAGAATTATTGCGAACGTACA	8843378	21	N	N	Y	0.429	0.571	0.714	0.143	0.857	0.143	0.286	0.857	TS
AT3G24360	3	8843390	8843699	+	MM123	1	9005235	9005544	310	GAACGTACATTGCTGCTGAAGAAGTGTTGATCTTGTTTTTGTACCAAGTTTGGAGCATTGCTCGTGTAAGTAATGAAGTTCTTTTAAGAAGTTTTTTTTATGTCATATTAGGATCTTGATTGTGTTCGAACTCCATTTTTTTATCAGAATATTTGCAAAATCTATATTTGTTTGTTTAAAATAGTCAAATGATAATTGGTATTTAGGTTTATAAATGTGTAGTATCGACATTCCATTTGTTTTTTATATGTATAGTATTTTTCAGTTGCATTTAATGTGTGTCTCCTGAATTTATGATGCAGGTGGGTTA	Y	Y	Y	Y	N	N	Y	Y	Y	Y	AACGTACATTGCTGCTGAAGAAG	8843391	23	N	N	Y	0.286	0.571	0.857	0.286	1	0.286	0.429	0.286	TS
AT3G24360	3	8843481	8843699	+	MM123	1	12713969	12714187	219	TTTTTTTTATGTCATATTAGGATCTTGATTGTGTTCGAACTCCATTTTTTTATCAGAATATTTGCAAAATCTATATTTGTTTGTTTAAAATAGTCAAATGATAATTGGTATTTAGGTTTATAAATGTGTAGTATCGACATTCCATTTGTTTTTTATATGTATAGTATTTTTCAGTTGCATTTAATGTGTGTCTCCTGAATTTATGATGCAGGTGGGTTA	Y	Y	Y	N	N	N	Y	Y	Y	Y	AACTCCATTTTTTTATCAGAATA	8843518	23	N	N	Y	0.143	0.286	0.429	0.143	1	0.571	0.571	0.857	TS
AT3G24360	3	8843701	8843789	+	MM123	1	9005546	9005634	89	GGATATTCCCGTATTTACCATGGTCGGTGAGTGGAAATGCAAAGAAGGAGAATGGAAATTTGAACCTGAGGAAGGCATCTTTGGTCGTT	Y	Y	Y	Y	N	N	Y	Y	Y	Y	AAATGCAAAGAAGGAGAATGG	8843735	21	N	N	Y	0.571	0.571	0.571	0	1	0.143	0.857	0.286	TS
AT3G24360	3	8843791	8844099	+	MM123	1	9005636	9005944	309	TGTACGCGTTCAGGAAACCATGACGTACACGGACTTTGTCCGTACACTCCGAGAGGCTTTCAGTTTGAAGTCCACCGAGATCAATCCCATAATTAGCTACTGGATGCCGGGTGAAATGTCAGTGCTGATAGATACTAAACGCCCTCCTGTATACATTGACAGTCAGATGGGTCTCGAGACGTTTTTTTTGGTTCGTGGTGGGTATCTTTCTCTCAACTTGTTCGTCTCTTTCAATAATACAGTGAAGGCGTTCGGGAATACTGTCTCTAGGTCTCATGGTGAAGTTTCTGAAAGTGACCGTGTGTTTGA	Y	Y	Y	Y	N	N	Y	Y	Y	Y	AGGAAACCATGACGTACACGG	8843802	21	N	N	Y	0.429	0.714	0.286	0	1	0.286	0.857	0.429	TS
AT3G24360	3	8844101	8844313	+	MM123	1	9005946	9006158	213	AGTGCTACAAATGTTGATGAAAATAATGAGGATGCAGAGGAGCAAGCCGATGTTGAAGACGATACAACAGAAGAGGATGAATTGGAGGAGGGCAACGAAGATGATGATGGGTGTGATGATTATCTTGGTGTGGATGGATCTATTGGGGGAAGTACCCTGTATCCTACCACAGACGGTAGTGAAGGTATTGGCGAAGAATACGATTACAACAAG	Y	Y	Y	Y	N	N	Y	Y	Y	Y	AAAATAATGAGGATGCAGAGG	8844120	21	N	N	Y	0.714	0.571	0.857	0.429	0.714	0	0.571	0.143	TS
AT3G24360	3	8844108	8844130	+	MM123	1	11753518	11753540	23	CAAATGTTGATGAAAATAATGAG	Y	Y	Y	Y	N	N	Y	Y	Y	Y	AAATGTTGATGAAAATAATGAG	8844109	22	Y	N	Y	0.429	0.714	0.714	0.429	0.857	0.143	0.143	0.571	TS
AT3G24360	3	8844315	8844338	+	MM123	1	9006160	9006183	24	GGAACGATGTAATAGTAGAAGAAT	Y	Y	Y	Y	N	N	Y	Y	Y	Y	AACGATGTAATAGTAGAAGAA	8844317	21	N	N	Y	0.286	0.429	0.571	0.286	1	0	0.857	0.571	TS
AT3G24360	3	8842977	8843074	-	MM123	1	9691148	9691245	98	AGGGTAAATTGCAGGCCACATCCGTTGACCATGTTTTATTTCCATGGATTGTCAAAGTCAAATGTGGTTTTCACCATTTGTCTTTTCGCCTGCAAAAT	Y	Y	Y	Y	N	N	Y	Y	Y	Y	AGGGTAAATTGCAGGCCACATCCG	8842977	24	N	N	Y	0.143	0.429	1	0	0.714	0.429	0.857	0.429	TS
AT3G24360	3	8843271	8843299	-	MM123	1	11051111	11051139	29	TTGTCACAATTAATGCAAAATCATCATTA	Y	Y	Y	Y	N	N	Y	Y	Y	Y	ACAATTAATGCAAAATCATCATTA	8843276	24	N	N	Y	0	0.429	0.571	0.143	1	0.286	0.714	0.857	TS
AT3G24360	3	8843357	8843699	-	MM123	1	9690523	9690865	343	AAGAAGATGAACCCAGGAACAAAGAATTATTGCGAACGTACATTGCTGCTGAAGAAGTGTTGATCTTGTTTTTGTACCAAGTTTGGAGCATTGCTCGTGTAAGTAATGAAGTTCTTTTAAGAAGTTTTTTTTATGTCATATTAGGATCTTGATTGTGTTCGAACTCCATTTTTTTATCAGAATATTTGCAAAATCTATATTTGTTTGTTTAAAATAGTCAAATGATAATTGGTATTTAGGTTTATAAATGTGTAGTATCGACATTCCATTTGTTTTTTATATGTATAGTATTTTTCAGTTGCATTTAATGTGTGTCTCCTGAATTTATGATGCAGGTGGGTTA	Y	Y	Y	Y	N	N	Y	Y	Y	Y	AAGAAGATGAACCCAGGAACA	8843357	21	N	N	Y	0.429	0.429	0.571	0	1	0.286	0.857	0.429	TS
AT3G24360	3	8843720	8843747	-	MM123	1	11050662	11050689	28	ATGGTCGGTGAGTGGAAATGCAAAGAAG	Y	Y	Y	Y	N	N	Y	Y	Y	Y	ATGGTCGGTGAGTGGAAATGCAA	8843720	23	Y	N	Y	0.429	0.857	1	0	0.714	0.571	0.286	0.143	TS
AT3G24360	3	8843916	8843940	-	MM123	1	6157881	6157905	25	TGATAGATACTAAACGCCCTCCTGT	Y	Y	Y	Y	N	N	Y	Y	Y	Y	GATAGATACTAAACGCCCTCCTGT	8843917	24	Y	N	Y	0.429	0.143	1	0.286	0.143	0.571	0.571	0.857	TS
AT3G24360	3	8844175	8844313	-	MM123	1	9689909	9690047	139	GGATGAATTGGAGGAGGGCAACGAAGATGATGATGGGTGTGATGATTATCTTGGTGTGGATGGATCTATTGGGGGAAGTACCCTGTATCCTACCACAGACGGTAGTGAAGGTATTGGCGAAGAATACGATTACAACAAG	Y	Y	Y	N	N	N	Y	Y	Y	Y	AGGAGGGCAACGAAGATGATG	8844186	21	N	N	Y	0.571	0.714	0.286	0	0.857	0.429	1	0.143	TS
AT3G24360	3	8842998	8843074	+	MM123	1	9004843	9004919	77	CCGTTGACCATGTTTTATTTCCATGGATTGTCAAAGTCAAATGTGGTTTTCACCATTTGTCTTTTCGCCTGCAAAAT	Y	Y	Y	Y	N	N	Y	Y	Y	Y	AAAGTCAAATGTGGTTTTCACCAT	8843030	24	N	N	Y	0.143	0.429	0.857	0	0.857	0.429	0.857	0.429	TS
AT3G24360	3	8842998	8843074	+	MM123	1	9004843	9004919	77	CCGTTGACCATGTTTTATTTCCATGGATTGTCAAAGTCAAATGTGGTTTTCACCATTTGTCTTTTCGCCTGCAAAAT	Y	Y	Y	Y	N	N	Y	Y	Y	Y	AAGTCAAATGTGGTTTTCACCATT	8843031	24	N	N	Y	0.143	0.429	1	0	0.714	0.571	0.857	0.286	TS
AT3G24360	3	8842998	8843074	+	MM123	1	9004843	9004919	77	CCGTTGACCATGTTTTATTTCCATGGATTGTCAAAGTCAAATGTGGTTTTCACCATTTGTCTTTTCGCCTGCAAAAT	Y	Y	Y	Y	N	N	Y	Y	Y	Y	AGTCAAATGTGGTTTTCACCATTT	8843032	24	N	N	Y	0.143	0.571	1	0	0.286	0.714	0.714	0.571	TS
AT3G24360	3	8842998	8843074	+	MM123	1	9004843	9004919	77	CCGTTGACCATGTTTTATTTCCATGGATTGTCAAAGTCAAATGTGGTTTTCACCATTTGTCTTTTCGCCTGCAAAAT	Y	Y	Y	Y	N	N	Y	Y	Y	Y	AAATGTGGTTTTCACCATTTGTCT	8843036	24	N	N	Y	0.143	0.714	1	0	0.429	0.857	0.571	0.286	TS
AT3G24360	3	8842998	8843074	+	MM123	1	9004843	9004919	77	CCGTTGACCATGTTTTATTTCCATGGATTGTCAAAGTCAAATGTGGTTTTCACCATTTGTCTTTTCGCCTGCAAAAT	Y	Y	Y	Y	N	N	Y	Y	Y	Y	AATGTGGTTTTCACCATTTGTCTT	8843037	24	N	N	Y	0.143	0.714	1	0	0.429	0.857	0.571	0.286	TS
AT3G24360	3	8843076	8843276	+	MM123	1	9004921	9005121	201	ACGCTTCTGCCCTTGCGCTTCTCTCTTAGCAACTGTTGAAATGTACGGTTTAGTTTAGCAGGTTTAGTTACGTACACTGTTCCGGTTCAGTTGAAGATTTTTTGTTCACGTTGACGCGATTCGGTTCCGTTACAAGTGAGATTATTCCGAAGTGACATCAACATTTAATGCCCCCAAAAAGTTTAGATGTGACTATTGTCA	Y	Y	Y	Y	N	N	Y	Y	Y	Y	AGCAACTGTTGAAATGTACGGTT	8843103	23	N	N	Y	0.286	0.714	0.429	0	1	0.857	0.571	0.143	TS
AT3G24360	3	8843076	8843276	+	MM123	1	9004921	9005121	201	ACGCTTCTGCCCTTGCGCTTCTCTCTTAGCAACTGTTGAAATGTACGGTTTAGTTTAGCAGGTTTAGTTACGTACACTGTTCCGGTTCAGTTGAAGATTTTTTGTTCACGTTGACGCGATTCGGTTCCGTTACAAGTGAGATTATTCCGAAGTGACATCAACATTTAATGCCCCCAAAAAGTTTAGATGTGACTATTGTCA	Y	Y	Y	Y	N	N	Y	Y	Y	Y	AACTGTTGAAATGTACGGTTTAG	8843106	23	N	N	Y	0.286	0.714	0.571	0	1	0.714	0.429	0.286	TS
AT3G24360	3	8843076	8843276	+	MM123	1	9004921	9005121	201	ACGCTTCTGCCCTTGCGCTTCTCTCTTAGCAACTGTTGAAATGTACGGTTTAGTTTAGCAGGTTTAGTTACGTACACTGTTCCGGTTCAGTTGAAGATTTTTTGTTCACGTTGACGCGATTCGGTTCCGTTACAAGTGAGATTATTCCGAAGTGACATCAACATTTAATGCCCCCAAAAAGTTTAGATGTGACTATTGTCA	Y	Y	Y	Y	N	N	Y	Y	Y	Y	ACTGTTGAAATGTACGGTTTAGT	8843107	23	N	N	Y	0.286	0.714	0.714	0	1	0.714	0.429	0.143	TS
AT3G24360	3	8843076	8843276	+	MM123	1	9004921	9005121	201	ACGCTTCTGCCCTTGCGCTTCTCTCTTAGCAACTGTTGAAATGTACGGTTTAGTTTAGCAGGTTTAGTTACGTACACTGTTCCGGTTCAGTTGAAGATTTTTTGTTCACGTTGACGCGATTCGGTTCCGTTACAAGTGAGATTATTCCGAAGTGACATCAACATTTAATGCCCCCAAAAAGTTTAGATGTGACTATTGTCA	Y	Y	Y	Y	N	N	Y	Y	Y	Y	AAATGTACGGTTTAGTTTAGCAG	8843114	23	N	N	Y	0.143	0.714	0.571	0.286	1	0.286	0.714	0.286	TS
AT3G24360	3	8843076	8843276	+	MM123	1	9004921	9005121	201	ACGCTTCTGCCCTTGCGCTTCTCTCTTAGCAACTGTTGAAATGTACGGTTTAGTTTAGCAGGTTTAGTTACGTACACTGTTCCGGTTCAGTTGAAGATTTTTTGTTCACGTTGACGCGATTCGGTTCCGTTACAAGTGAGATTATTCCGAAGTGACATCAACATTTAATGCCCCCAAAAAGTTTAGATGTGACTATTGTCA	Y	Y	Y	Y	N	N	Y	Y	Y	Y	AATGTACGGTTTAGTTTAGCAGG	8843115	23	N	N	Y	0.143	0.714	0.714	0.143	0.857	0.286	0.714	0.429	TS
AT3G24360	3	8843076	8843276	+	MM123	1	9004921	9005121	201	ACGCTTCTGCCCTTGCGCTTCTCTCTTAGCAACTGTTGAAATGTACGGTTTAGTTTAGCAGGTTTAGTTACGTACACTGTTCCGGTTCAGTTGAAGATTTTTTGTTCACGTTGACGCGATTCGGTTCCGTTACAAGTGAGATTATTCCGAAGTGACATCAACATTTAATGCCCCCAAAAAGTTTAGATGTGACTATTGTCA	Y	Y	Y	Y	N	N	Y	Y	Y	Y	ATGTACGGTTTAGTTTAGCAGGT	8843116	23	N	N	Y	0.286	0.571	0.857	0.286	0.857	0.571	0.571	0	TS
AT3G24360	3	8843076	8843276	+	MM123	1	9004921	9005121	201	ACGCTTCTGCCCTTGCGCTTCTCTCTTAGCAACTGTTGAAATGTACGGTTTAGTTTAGCAGGTTTAGTTACGTACACTGTTCCGGTTCAGTTGAAGATTTTTTGTTCACGTTGACGCGATTCGGTTCCGTTACAAGTGAGATTATTCCGAAGTGACATCAACATTTAATGCCCCCAAAAAGTTTAGATGTGACTATTGTCA	Y	Y	Y	Y	N	N	Y	Y	Y	Y	ACGGTTTAGTTTAGCAGGTTTAG	8843120	23	N	N	Y	0	0.714	0.429	0.143	1	0.571	0.714	0.429	TS
AT3G24360	3	8843076	8843276	+	MM123	1	9004921	9005121	201	ACGCTTCTGCCCTTGCGCTTCTCTCTTAGCAACTGTTGAAATGTACGGTTTAGTTTAGCAGGTTTAGTTACGTACACTGTTCCGGTTCAGTTGAAGATTTTTTGTTCACGTTGACGCGATTCGGTTCCGTTACAAGTGAGATTATTCCGAAGTGACATCAACATTTAATGCCCCCAAAAAGTTTAGATGTGACTATTGTCA	Y	Y	Y	Y	N	N	Y	Y	Y	Y	AGCAGGTTTAGTTACGTACACTG	8843132	23	N	N	Y	0.286	0.429	0.714	0.429	0.714	0.429	0.714	0.286	TS
AT3G24360	3	8843076	8843276	+	MM123	1	9004921	9005121	201	ACGCTTCTGCCCTTGCGCTTCTCTCTTAGCAACTGTTGAAATGTACGGTTTAGTTTAGCAGGTTTAGTTACGTACACTGTTCCGGTTCAGTTGAAGATTTTTTGTTCACGTTGACGCGATTCGGTTCCGTTACAAGTGAGATTATTCCGAAGTGACATCAACATTTAATGCCCCCAAAAAGTTTAGATGTGACTATTGTCA	Y	Y	Y	Y	N	N	Y	Y	Y	Y	AGCAACTGTTGAAATGTACGGTTT	8843103	24	N	N	Y	0.286	0.571	1	0	0.714	0.429	0.857	0.143	TS
AT3G24360	3	8843076	8843276	+	MM123	1	9004921	9005121	201	ACGCTTCTGCCCTTGCGCTTCTCTCTTAGCAACTGTTGAAATGTACGGTTTAGTTTAGCAGGTTTAGTTACGTACACTGTTCCGGTTCAGTTGAAGATTTTTTGTTCACGTTGACGCGATTCGGTTCCGTTACAAGTGAGATTATTCCGAAGTGACATCAACATTTAATGCCCCCAAAAAGTTTAGATGTGACTATTGTCA	Y	Y	Y	Y	N	N	Y	Y	Y	Y	GCAACTGTTGAAATGTACGGTTTA	8843104	24	N	N	Y	0.571	0.143	0.857	0	0.286	0.714	0.571	0.857	TS
AT3G24360	3	8843076	8843276	+	MM123	1	9004921	9005121	201	ACGCTTCTGCCCTTGCGCTTCTCTCTTAGCAACTGTTGAAATGTACGGTTTAGTTTAGCAGGTTTAGTTACGTACACTGTTCCGGTTCAGTTGAAGATTTTTTGTTCACGTTGACGCGATTCGGTTCCGTTACAAGTGAGATTATTCCGAAGTGACATCAACATTTAATGCCCCCAAAAAGTTTAGATGTGACTATTGTCA	Y	Y	Y	Y	N	N	Y	Y	Y	Y	AACTGTTGAAATGTACGGTTTAGT	8843106	24	Y	N	Y	0.286	0.429	1	0	0.857	0.571	0.714	0.143	TS
AT3G24360	3	8843076	8843276	+	MM123	1	9004921	9005121	201	ACGCTTCTGCCCTTGCGCTTCTCTCTTAGCAACTGTTGAAATGTACGGTTTAGTTTAGCAGGTTTAGTTACGTACACTGTTCCGGTTCAGTTGAAGATTTTTTGTTCACGTTGACGCGATTCGGTTCCGTTACAAGTGAGATTATTCCGAAGTGACATCAACATTTAATGCCCCCAAAAAGTTTAGATGTGACTATTGTCA	Y	Y	Y	Y	N	N	Y	Y	Y	Y	ACTGTTGAAATGTACGGTTTAGTT	8843107	24	N	N	Y	0.286	0.429	1	0	0.857	0.571	0.714	0.143	TS
AT3G24360	3	8843076	8843276	+	MM123	1	9004921	9005121	201	ACGCTTCTGCCCTTGCGCTTCTCTCTTAGCAACTGTTGAAATGTACGGTTTAGTTTAGCAGGTTTAGTTACGTACACTGTTCCGGTTCAGTTGAAGATTTTTTGTTCACGTTGACGCGATTCGGTTCCGTTACAAGTGAGATTATTCCGAAGTGACATCAACATTTAATGCCCCCAAAAAGTTTAGATGTGACTATTGTCA	Y	Y	Y	Y	N	N	Y	Y	Y	Y	GTTGAAATGTACGGTTTAGTTTAG	8843110	24	Y	N	Y	0.571	0.286	1	0.143	0	0.429	0.714	0.857	TS
AT3G24360	3	8843076	8843276	+	MM123	1	9004921	9005121	201	ACGCTTCTGCCCTTGCGCTTCTCTCTTAGCAACTGTTGAAATGTACGGTTTAGTTTAGCAGGTTTAGTTACGTACACTGTTCCGGTTCAGTTGAAGATTTTTTGTTCACGTTGACGCGATTCGGTTCCGTTACAAGTGAGATTATTCCGAAGTGACATCAACATTTAATGCCCCCAAAAAGTTTAGATGTGACTATTGTCA	Y	Y	Y	Y	N	N	Y	Y	Y	Y	GAAATGTACGGTTTAGTTTAGCAG	8843113	24	Y	N	Y	0.571	0.143	1	0	0.286	0.429	0.857	0.714	TS
AT3G24360	3	8843076	8843276	+	MM123	1	9004921	9005121	201	ACGCTTCTGCCCTTGCGCTTCTCTCTTAGCAACTGTTGAAATGTACGGTTTAGTTTAGCAGGTTTAGTTACGTACACTGTTCCGGTTCAGTTGAAGATTTTTTGTTCACGTTGACGCGATTCGGTTCCGTTACAAGTGAGATTATTCCGAAGTGACATCAACATTTAATGCCCCCAAAAAGTTTAGATGTGACTATTGTCA	Y	Y	Y	Y	N	N	Y	Y	Y	Y	AAATGTACGGTTTAGTTTAGCAGG	8843114	24	Y	N	Y	0	0.429	0.857	0.143	0.714	0.429	1	0.429	TS
AT3G24360	3	8843076	8843276	+	MM123	1	9004921	9005121	201	ACGCTTCTGCCCTTGCGCTTCTCTCTTAGCAACTGTTGAAATGTACGGTTTAGTTTAGCAGGTTTAGTTACGTACACTGTTCCGGTTCAGTTGAAGATTTTTTGTTCACGTTGACGCGATTCGGTTCCGTTACAAGTGAGATTATTCCGAAGTGACATCAACATTTAATGCCCCCAAAAAGTTTAGATGTGACTATTGTCA	Y	Y	Y	Y	N	N	Y	Y	Y	Y	AATGTACGGTTTAGTTTAGCAGGT	8843115	24	N	N	Y	0.143	0.571	1	0.143	0.714	0.429	0.857	0.143	TS
AT3G24360	3	8843076	8843276	+	MM123	1	9004921	9005121	201	ACGCTTCTGCCCTTGCGCTTCTCTCTTAGCAACTGTTGAAATGTACGGTTTAGTTTAGCAGGTTTAGTTACGTACACTGTTCCGGTTCAGTTGAAGATTTTTTGTTCACGTTGACGCGATTCGGTTCCGTTACAAGTGAGATTATTCCGAAGTGACATCAACATTTAATGCCCCCAAAAAGTTTAGATGTGACTATTGTCA	Y	Y	Y	Y	N	N	Y	Y	Y	Y	ATGTACGGTTTAGTTTAGCAGGTT	8843116	24	Y	N	Y	0.143	0.429	0.857	0.143	0.714	0.571	1	0.143	TS
AT3G24360	3	8843076	8843276	+	MM123	1	9004921	9005121	201	ACGCTTCTGCCCTTGCGCTTCTCTCTTAGCAACTGTTGAAATGTACGGTTTAGTTTAGCAGGTTTAGTTACGTACACTGTTCCGGTTCAGTTGAAGATTTTTTGTTCACGTTGACGCGATTCGGTTCCGTTACAAGTGAGATTATTCCGAAGTGACATCAACATTTAATGCCCCCAAAAAGTTTAGATGTGACTATTGTCA	Y	Y	Y	Y	N	N	Y	Y	Y	Y	ACGGTTTAGTTTAGCAGGTTTAGT	8843120	24	Y	Y	Y	0.143	0.429	0.857	0.143	0.714	0.429	1	0.286	TS
AT3G24360	3	8843076	8843276	+	MM123	1	9004921	9005121	201	ACGCTTCTGCCCTTGCGCTTCTCTCTTAGCAACTGTTGAAATGTACGGTTTAGTTTAGCAGGTTTAGTTACGTACACTGTTCCGGTTCAGTTGAAGATTTTTTGTTCACGTTGACGCGATTCGGTTCCGTTACAAGTGAGATTATTCCGAAGTGACATCAACATTTAATGCCCCCAAAAAGTTTAGATGTGACTATTGTCA	Y	Y	Y	Y	N	N	Y	Y	Y	Y	AGTTTAGCAGGTTTAGTTACGTAC	8843127	24	N	N	Y	0.143	0.429	0.857	0.143	0.714	0.286	1	0.429	TS
AT3G24360	3	8843076	8843276	+	MM123	1	9004921	9005121	201	ACGCTTCTGCCCTTGCGCTTCTCTCTTAGCAACTGTTGAAATGTACGGTTTAGTTTAGCAGGTTTAGTTACGTACACTGTTCCGGTTCAGTTGAAGATTTTTTGTTCACGTTGACGCGATTCGGTTCCGTTACAAGTGAGATTATTCCGAAGTGACATCAACATTTAATGCCCCCAAAAAGTTTAGATGTGACTATTGTCA	Y	Y	Y	Y	N	N	Y	Y	Y	Y	GTTTAGCAGGTTTAGTTACGTACA	8843128	24	Y	N	Y	0.571	0.143	1	0.143	0.429	0.143	0.714	0.857	TS
AT3G24360	3	8843076	8843276	+	MM123	1	9004921	9005121	201	ACGCTTCTGCCCTTGCGCTTCTCTCTTAGCAACTGTTGAAATGTACGGTTTAGTTTAGCAGGTTTAGTTACGTACACTGTTCCGGTTCAGTTGAAGATTTTTTGTTCACGTTGACGCGATTCGGTTCCGTTACAAGTGAGATTATTCCGAAGTGACATCAACATTTAATGCCCCCAAAAAGTTTAGATGTGACTATTGTCA	Y	Y	Y	Y	N	N	Y	Y	Y	Y	AGCAGGTTTAGTTACGTACACTGT	8843132	24	N	N	Y	0.286	0.571	1	0.143	0.714	0.143	0.857	0.286	TS
AT3G24360	3	8843076	8843276	+	MM123	1	9004921	9005121	201	ACGCTTCTGCCCTTGCGCTTCTCTCTTAGCAACTGTTGAAATGTACGGTTTAGTTTAGCAGGTTTAGTTACGTACACTGTTCCGGTTCAGTTGAAGATTTTTTGTTCACGTTGACGCGATTCGGTTCCGTTACAAGTGAGATTATTCCGAAGTGACATCAACATTTAATGCCCCCAAAAAGTTTAGATGTGACTATTGTCA	Y	Y	Y	Y	N	N	Y	Y	Y	Y	GCAGGTTTAGTTACGTACACTGTT	8843133	24	N	N	Y	0.714	0.286	1	0.143	0	0.429	0.714	0.714	TS
AT3G24360	3	8843076	8843276	+	MM123	1	9004921	9005121	201	ACGCTTCTGCCCTTGCGCTTCTCTCTTAGCAACTGTTGAAATGTACGGTTTAGTTTAGCAGGTTTAGTTACGTACACTGTTCCGGTTCAGTTGAAGATTTTTTGTTCACGTTGACGCGATTCGGTTCCGTTACAAGTGAGATTATTCCGAAGTGACATCAACATTTAATGCCCCCAAAAAGTTTAGATGTGACTATTGTCA	Y	Y	Y	Y	N	N	Y	Y	Y	Y	AGGTTTAGTTACGTACACTGTTCC	8843135	24	N	N	Y	0.143	0.571	1	0.143	0.571	0.286	0.857	0.429	TS
AT3G24360	3	8843076	8843276	+	MM123	1	9004921	9005121	201	ACGCTTCTGCCCTTGCGCTTCTCTCTTAGCAACTGTTGAAATGTACGGTTTAGTTTAGCAGGTTTAGTTACGTACACTGTTCCGGTTCAGTTGAAGATTTTTTGTTCACGTTGACGCGATTCGGTTCCGTTACAAGTGAGATTATTCCGAAGTGACATCAACATTTAATGCCCCCAAAAAGTTTAGATGTGACTATTGTCA	Y	Y	Y	Y	N	N	Y	Y	Y	Y	GTTTAGTTACGTACACTGTTCCGG	8843137	24	N	N	Y	0.571	0.286	1	0.286	0	0.571	0.429	0.857	TS
AT3G24360	3	8843076	8843276	+	MM123	1	9004921	9005121	201	ACGCTTCTGCCCTTGCGCTTCTCTCTTAGCAACTGTTGAAATGTACGGTTTAGTTTAGCAGGTTTAGTTACGTACACTGTTCCGGTTCAGTTGAAGATTTTTTGTTCACGTTGACGCGATTCGGTTCCGTTACAAGTGAGATTATTCCGAAGTGACATCAACATTTAATGCCCCCAAAAAGTTTAGATGTGACTATTGTCA	Y	Y	Y	Y	N	N	Y	Y	Y	Y	AGTTACGTACACTGTTCCGGTTCA	8843141	24	Y	N	Y	0.143	0.429	1	0.143	0.857	0.429	0.714	0.286	TS
AT3G24360	3	8843076	8843276	+	MM123	1	9004921	9005121	201	ACGCTTCTGCCCTTGCGCTTCTCTCTTAGCAACTGTTGAAATGTACGGTTTAGTTTAGCAGGTTTAGTTACGTACACTGTTCCGGTTCAGTTGAAGATTTTTTGTTCACGTTGACGCGATTCGGTTCCGTTACAAGTGAGATTATTCCGAAGTGACATCAACATTTAATGCCCCCAAAAAGTTTAGATGTGACTATTGTCA	Y	Y	Y	Y	N	N	Y	Y	Y	Y	GTTACGTACACTGTTCCGGTTCAG	8843142	24	N	N	Y	0.571	0.286	0.857	0.429	0	0.286	0.714	0.857	TS
AT3G24360	3	8843076	8843276	+	MM123	1	9004921	9005121	201	ACGCTTCTGCCCTTGCGCTTCTCTCTTAGCAACTGTTGAAATGTACGGTTTAGTTTAGCAGGTTTAGTTACGTACACTGTTCCGGTTCAGTTGAAGATTTTTTGTTCACGTTGACGCGATTCGGTTCCGTTACAAGTGAGATTATTCCGAAGTGACATCAACATTTAATGCCCCCAAAAAGTTTAGATGTGACTATTGTCA	Y	Y	Y	Y	N	N	Y	Y	Y	Y	ACGTACACTGTTCCGGTTCAGTTG	8843145	24	N	N	Y	0.143	0.571	1	0.143	0.571	0.429	0.857	0.286	TS
AT3G24360	3	8843076	8843276	+	MM123	1	9004921	9005121	201	ACGCTTCTGCCCTTGCGCTTCTCTCTTAGCAACTGTTGAAATGTACGGTTTAGTTTAGCAGGTTTAGTTACGTACACTGTTCCGGTTCAGTTGAAGATTTTTTGTTCACGTTGACGCGATTCGGTTCCGTTACAAGTGAGATTATTCCGAAGTGACATCAACATTTAATGCCCCCAAAAAGTTTAGATGTGACTATTGTCA	Y	Y	Y	Y	N	N	Y	Y	Y	Y	AGTTGAAGATTTTTTGTTCACGTT	8843164	24	N	N	Y	0.143	0.429	1	0	0.571	0.571	0.857	0.429	TS
AT3G24360	3	8843076	8843276	+	MM123	1	9004921	9005121	201	ACGCTTCTGCCCTTGCGCTTCTCTCTTAGCAACTGTTGAAATGTACGGTTTAGTTTAGCAGGTTTAGTTACGTACACTGTTCCGGTTCAGTTGAAGATTTTTTGTTCACGTTGACGCGATTCGGTTCCGTTACAAGTGAGATTATTCCGAAGTGACATCAACATTTAATGCCCCCAAAAAGTTTAGATGTGACTATTGTCA	Y	Y	Y	Y	N	N	Y	Y	Y	Y	GTTGAAGATTTTTTGTTCACGTTG	8843165	24	N	N	Y	0.571	0.429	1	0.286	0	0.571	0.286	0.857	TS
AT3G24360	3	8843076	8843276	+	MM123	1	9004921	9005121	201	ACGCTTCTGCCCTTGCGCTTCTCTCTTAGCAACTGTTGAAATGTACGGTTTAGTTTAGCAGGTTTAGTTACGTACACTGTTCCGGTTCAGTTGAAGATTTTTTGTTCACGTTGACGCGATTCGGTTCCGTTACAAGTGAGATTATTCCGAAGTGACATCAACATTTAATGCCCCCAAAAAGTTTAGATGTGACTATTGTCA	Y	Y	Y	Y	N	N	Y	Y	Y	Y	AAGATTTTTTGTTCACGTTGACGC	8843169	24	N	N	Y	0	0.429	0.857	0.143	1	0.571	0.714	0.286	TS
AT3G24360	3	8843076	8843276	+	MM123	1	9004921	9005121	201	ACGCTTCTGCCCTTGCGCTTCTCTCTTAGCAACTGTTGAAATGTACGGTTTAGTTTAGCAGGTTTAGTTACGTACACTGTTCCGGTTCAGTTGAAGATTTTTTGTTCACGTTGACGCGATTCGGTTCCGTTACAAGTGAGATTATTCCGAAGTGACATCAACATTTAATGCCCCCAAAAAGTTTAGATGTGACTATTGTCA	Y	Y	Y	Y	N	N	Y	Y	Y	Y	AGATTTTTTGTTCACGTTGACGCG	8843170	24	N	N	Y	0	0.714	0.714	0.143	0.429	0.714	0.857	0.429	TS
AT3G24360	3	8843076	8843276	+	MM123	1	9004921	9005121	201	ACGCTTCTGCCCTTGCGCTTCTCTCTTAGCAACTGTTGAAATGTACGGTTTAGTTTAGCAGGTTTAGTTACGTACACTGTTCCGGTTCAGTTGAAGATTTTTTGTTCACGTTGACGCGATTCGGTTCCGTTACAAGTGAGATTATTCCGAAGTGACATCAACATTTAATGCCCCCAAAAAGTTTAGATGTGACTATTGTCA	Y	Y	Y	Y	N	N	Y	Y	Y	Y	ATTATTCCGAAGTGACATCAACAT	8843216	24	Y	N	Y	0	0.571	0.714	0.143	1	0.286	0.857	0.429	TS
AT3G24360	3	8843076	8843276	+	MM123	1	9004921	9005121	201	ACGCTTCTGCCCTTGCGCTTCTCTCTTAGCAACTGTTGAAATGTACGGTTTAGTTTAGCAGGTTTAGTTACGTACACTGTTCCGGTTCAGTTGAAGATTTTTTGTTCACGTTGACGCGATTCGGTTCCGTTACAAGTGAGATTATTCCGAAGTGACATCAACATTTAATGCCCCCAAAAAGTTTAGATGTGACTATTGTCA	Y	Y	Y	Y	N	N	Y	Y	Y	Y	ATTTAATGCCCCCAAAAAGTTTAG	8843238	24	N	N	Y	0	0.857	1	0.143	0.429	0.286	0.571	0.714	TS
AT3G24360	3	8843232	8843319	+	MM123	1	12713720	12713807	88	ATCAACATTTAATGCCCCCAAAAAGTTTAGATGTGACTATTGTCACAATTAATGCAAAATCATCATTACATCAAATAATATTAAAAAA	Y	Y	Y	N	N	N	Y	Y	Y	Y	ATTAATGCAAAATCATCATTACA	8843279	23	N	N	Y	0.143	0.429	0.571	0.286	1	0	0.857	0.714	TS
AT3G24360	3	8843232	8843319	+	MM123	1	12713720	12713807	88	ATCAACATTTAATGCCCCCAAAAAGTTTAGATGTGACTATTGTCACAATTAATGCAAAATCATCATTACATCAAATAATATTAAAAAA	Y	Y	Y	N	N	N	Y	Y	Y	Y	AATGCAAAATCATCATTACATCA	8843282	23	N	N	Y	0.143	0.429	0.571	0.286	1	0	0.857	0.714	TS
AT3G24360	3	8843232	8843319	+	MM123	1	12713720	12713807	88	ATCAACATTTAATGCCCCCAAAAAGTTTAGATGTGACTATTGTCACAATTAATGCAAAATCATCATTACATCAAATAATATTAAAAAA	Y	Y	Y	N	N	N	Y	Y	Y	Y	ATGCAAAATCATCATTACATCAA	8843283	23	N	N	Y	0.143	0.429	0.571	0.286	1	0	0.857	0.714	TS
AT3G24360	3	8843232	8843319	+	MM123	1	12713720	12713807	88	ATCAACATTTAATGCCCCCAAAAAGTTTAGATGTGACTATTGTCACAATTAATGCAAAATCATCATTACATCAAATAATATTAAAAAA	Y	Y	Y	N	N	N	Y	Y	Y	Y	AATCATCATTACATCAAATAATA	8843289	23	N	N	Y	0.143	0.286	0.571	0.429	1	0.143	0.571	0.857	TS
AT3G24360	3	8843232	8843319	+	MM123	1	12713720	12713807	88	ATCAACATTTAATGCCCCCAAAAAGTTTAGATGTGACTATTGTCACAATTAATGCAAAATCATCATTACATCAAATAATATTAAAAAA	Y	Y	Y	N	N	N	Y	Y	Y	Y	ATCATCATTACATCAAATAATAT	8843290	23	N	N	Y	0.143	0.143	0.571	0.571	1	0.143	0.571	0.857	TS
AT3G24360	3	8843232	8843319	+	MM123	1	12713720	12713807	88	ATCAACATTTAATGCCCCCAAAAAGTTTAGATGTGACTATTGTCACAATTAATGCAAAATCATCATTACATCAAATAATATTAAAAAA	Y	Y	Y	N	N	N	Y	Y	Y	Y	ATTGTCACAATTAATGCAAAATCA	8843270	24	N	N	Y	0	0.429	0.857	0.143	1	0.286	0.714	0.571	TS
AT3G24360	3	8843232	8843319	+	MM123	1	12713720	12713807	88	ATCAACATTTAATGCCCCCAAAAAGTTTAGATGTGACTATTGTCACAATTAATGCAAAATCATCATTACATCAAATAATATTAAAAAA	Y	Y	Y	N	N	N	Y	Y	Y	Y	AATTAATGCAAAATCATCATTACA	8843278	24	N	N	Y	0	0.429	0.714	0.143	1	0.286	0.857	0.571	TS
AT3G24360	3	8843232	8843319	+	MM123	1	12713720	12713807	88	ATCAACATTTAATGCCCCCAAAAAGTTTAGATGTGACTATTGTCACAATTAATGCAAAATCATCATTACATCAAATAATATTAAAAAA	Y	Y	Y	N	N	N	Y	Y	Y	Y	ATTAATGCAAAATCATCATTACAT	8843279	24	N	N	Y	0	0.429	0.714	0.143	1	0.286	0.857	0.571	TS
AT3G24360	3	8843232	8843319	+	MM123	1	12713720	12713807	88	ATCAACATTTAATGCCCCCAAAAAGTTTAGATGTGACTATTGTCACAATTAATGCAAAATCATCATTACATCAAATAATATTAAAAAA	Y	Y	Y	N	N	N	Y	Y	Y	Y	AATGCAAAATCATCATTACATCAA	8843282	24	N	N	Y	0	0.429	0.571	0.143	1	0.286	0.857	0.714	TS
AT3G24360	3	8843232	8843319	+	MM123	1	12713720	12713807	88	ATCAACATTTAATGCCCCCAAAAAGTTTAGATGTGACTATTGTCACAATTAATGCAAAATCATCATTACATCAAATAATATTAAAAAA	Y	Y	Y	N	N	N	Y	Y	Y	Y	ATGCAAAATCATCATTACATCAAA	8843283	24	Y	N	Y	0	0.286	0.571	0.286	1	0.286	0.857	0.714	TS
AT3G24360	3	8843232	8843319	+	MM123	1	12713720	12713807	88	ATCAACATTTAATGCCCCCAAAAAGTTTAGATGTGACTATTGTCACAATTAATGCAAAATCATCATTACATCAAATAATATTAAAAAA	Y	Y	Y	N	N	N	Y	Y	Y	Y	AAAATCATCATTACATCAAATAAT	8843287	24	N	N	Y	0	0.286	0.571	0.286	1	0.286	0.857	0.714	TS
AT3G24360	3	8843232	8843319	+	MM123	1	12713720	12713807	88	ATCAACATTTAATGCCCCCAAAAAGTTTAGATGTGACTATTGTCACAATTAATGCAAAATCATCATTACATCAAATAATATTAAAAAA	Y	Y	Y	N	N	N	Y	Y	Y	Y	AAATCATCATTACATCAAATAATA	8843288	24	N	N	Y	0	0.286	0.571	0.286	1	0.286	0.714	0.857	TS
AT3G24360	3	8843232	8843319	+	MM123	1	12713720	12713807	88	ATCAACATTTAATGCCCCCAAAAAGTTTAGATGTGACTATTGTCACAATTAATGCAAAATCATCATTACATCAAATAATATTAAAAAA	Y	Y	Y	N	N	N	Y	Y	Y	Y	AATCATCATTACATCAAATAATAT	8843289	24	N	N	Y	0	0.143	0.571	0.429	1	0.286	0.857	0.714	TS
AT3G24360	3	8843232	8843319	+	MM123	1	12713720	12713807	88	ATCAACATTTAATGCCCCCAAAAAGTTTAGATGTGACTATTGTCACAATTAATGCAAAATCATCATTACATCAAATAATATTAAAAAA	Y	Y	Y	N	N	N	Y	Y	Y	Y	ATCATCATTACATCAAATAATATT	8843290	24	N	N	Y	0	0.143	0.571	0.429	1	0.286	0.857	0.714	TS
AT3G24360	3	8843336	8843367	+	MM123	1	12713823	12713854	32	AAAAAAAAATTTGTTGAGATAAAGAAGATGAA	Y	Y	Y	N	N	N	Y	Y	Y	Y	ATTTGTTGAGATAAAGAAGAT	8843344	21	N	N	Y	0.429	0.571	0.429	0.714	1	0	0.571	0.286	TS
AT3G24360	3	8843336	8843367	+	MM123	1	12713823	12713854	32	AAAAAAAAATTTGTTGAGATAAAGAAGATGAA	Y	Y	Y	N	N	N	Y	Y	Y	Y	AAAATTTGTTGAGATAAAGAAG	8843341	22	N	N	Y	0.143	0.429	0.571	0.714	0.857	0	0.714	0.571	TS
AT3G24360	3	8843336	8843367	+	MM123	1	12713823	12713854	32	AAAAAAAAATTTGTTGAGATAAAGAAGATGAA	Y	Y	Y	N	N	N	Y	Y	Y	Y	AAATTTGTTGAGATAAAGAAGA	8843342	22	N	N	Y	0.143	0.429	0.714	0.429	1	0	0.714	0.571	TS
AT3G24360	3	8843336	8843367	+	MM123	1	12713823	12713854	32	AAAAAAAAATTTGTTGAGATAAAGAAGATGAA	Y	Y	Y	N	N	N	Y	Y	Y	Y	ATTTGTTGAGATAAAGAAGATG	8843344	22	N	N	Y	0.286	0.714	0.571	0.429	1	0	0.714	0.286	TS
AT3G24360	3	8843345	8843388	+	MM123	1	9005190	9005233	44	TTTGTTGAGATAAAGAAGATGAACCCAGGAACAAAGAATTATTG	Y	Y	Y	Y	N	N	Y	Y	Y	Y	AAAGAAGATGAACCCAGGAAC	8843356	21	N	N	Y	0.429	0.571	0.571	0	1	0.286	0.857	0.286	TS
AT3G24360	3	8843345	8843388	+	MM123	1	9005190	9005233	44	TTTGTTGAGATAAAGAAGATGAACCCAGGAACAAAGAATTATTG	Y	Y	Y	Y	N	N	Y	Y	Y	Y	AGAAGATGAACCCAGGAACAA	8843358	21	N	N	Y	0.286	0.429	0.286	0	1	0.429	0.857	0.714	TS
AT3G24360	3	8843345	8843388	+	MM123	1	9005190	9005233	44	TTTGTTGAGATAAAGAAGATGAACCCAGGAACAAAGAATTATTG	Y	Y	Y	Y	N	N	Y	Y	Y	Y	AAGATGAACCCAGGAACAAAG	8843360	21	N	N	Y	0.286	0.429	0.714	0	1	0.286	0.714	0.571	TS
AT3G24360	3	8843345	8843388	+	MM123	1	9005190	9005233	44	TTTGTTGAGATAAAGAAGATGAACCCAGGAACAAAGAATTATTG	Y	Y	Y	Y	N	N	Y	Y	Y	Y	AGATGAACCCAGGAACAAAGA	8843361	21	N	N	Y	0.286	0.429	0.571	0	0.857	0.429	0.571	0.857	TS
AT3G24360	3	8843345	8843388	+	MM123	1	9005190	9005233	44	TTTGTTGAGATAAAGAAGATGAACCCAGGAACAAAGAATTATTG	Y	Y	Y	Y	N	N	Y	Y	Y	Y	ATGAACCCAGGAACAAAGAAT	8843363	21	N	N	Y	0.286	0.571	0.714	0	1	0.286	0.571	0.571	TS
AT3G24360	3	8843345	8843388	+	MM123	1	9005190	9005233	44	TTTGTTGAGATAAAGAAGATGAACCCAGGAACAAAGAATTATTG	Y	Y	Y	Y	N	N	Y	Y	Y	Y	AACCCAGGAACAAAGAATTAT	8843366	21	N	N	Y	0.429	0.429	0.714	0	0.857	0.286	0.429	0.857	TS
AT3G24360	3	8843345	8843388	+	MM123	1	9005190	9005233	44	TTTGTTGAGATAAAGAAGATGAACCCAGGAACAAAGAATTATTG	Y	Y	Y	Y	N	N	Y	Y	Y	Y	TTGAGATAAAGAAGATGAACCC	8843349	22	N	N	Y	0.714	0.143	0.286	0.571	0.286	0.143	1	0.857	TS
AT3G24360	3	8843345	8843388	+	MM123	1	9005190	9005233	44	TTTGTTGAGATAAAGAAGATGAACCCAGGAACAAAGAATTATTG	Y	Y	Y	Y	N	N	Y	Y	Y	Y	ATAAAGAAGATGAACCCAGGAA	8843354	22	N	N	Y	0.286	0.571	0.571	0.286	1	0	0.857	0.429	TS
AT3G24360	3	8843345	8843388	+	MM123	1	9005190	9005233	44	TTTGTTGAGATAAAGAAGATGAACCCAGGAACAAAGAATTATTG	Y	Y	Y	Y	N	N	Y	Y	Y	Y	TAAAGAAGATGAACCCAGGAAC	8843355	22	N	N	Y	0.714	0	0.286	0.571	0.286	0.286	1	0.857	TS
AT3G24360	3	8843345	8843388	+	MM123	1	9005190	9005233	44	TTTGTTGAGATAAAGAAGATGAACCCAGGAACAAAGAATTATTG	Y	Y	Y	Y	N	N	Y	Y	Y	Y	AAAGAAGATGAACCCAGGAACA	8843356	22	N	N	Y	0.286	0.571	0.714	0.286	1	0.143	0.857	0.143	TS
AT3G24360	3	8843345	8843388	+	MM123	1	9005190	9005233	44	TTTGTTGAGATAAAGAAGATGAACCCAGGAACAAAGAATTATTG	Y	Y	Y	Y	N	N	Y	Y	Y	Y	AAGAAGATGAACCCAGGAACAA	8843357	22	N	N	Y	0.286	0.429	0.714	0.143	1	0	0.857	0.571	TS
AT3G24360	3	8843345	8843388	+	MM123	1	9005190	9005233	44	TTTGTTGAGATAAAGAAGATGAACCCAGGAACAAAGAATTATTG	Y	Y	Y	Y	N	N	Y	Y	Y	Y	AGAAGATGAACCCAGGAACAAA	8843358	22	N	N	Y	0.143	0.429	0.429	0.143	1	0.286	0.857	0.714	TS
AT3G24360	3	8843345	8843388	+	MM123	1	9005190	9005233	44	TTTGTTGAGATAAAGAAGATGAACCCAGGAACAAAGAATTATTG	Y	Y	Y	Y	N	N	Y	Y	Y	Y	AAGATGAACCCAGGAACAAAGA	8843360	22	N	N	Y	0.143	0.429	0.714	0	1	0.286	0.857	0.571	TS
AT3G24360	3	8843345	8843388	+	MM123	1	9005190	9005233	44	TTTGTTGAGATAAAGAAGATGAACCCAGGAACAAAGAATTATTG	Y	Y	Y	Y	N	N	Y	Y	Y	Y	AGATGAACCCAGGAACAAAGAA	8843361	22	N	N	Y	0.143	0.429	0.571	0.143	1	0.286	0.714	0.714	TS
AT3G24360	3	8843345	8843388	+	MM123	1	9005190	9005233	44	TTTGTTGAGATAAAGAAGATGAACCCAGGAACAAAGAATTATTG	Y	Y	Y	Y	N	N	Y	Y	Y	Y	ATGAACCCAGGAACAAAGAATT	8843363	22	N	N	Y	0.143	0.714	0.714	0	1	0.286	0.571	0.571	TS
AT3G24360	3	8843345	8843388	+	MM123	1	9005190	9005233	44	TTTGTTGAGATAAAGAAGATGAACCCAGGAACAAAGAATTATTG	Y	Y	Y	Y	N	N	Y	Y	Y	Y	AACCCAGGAACAAAGAATTATT	8843366	22	N	N	Y	0.143	0.714	0.714	0	1	0.286	0.429	0.714	TS
AT3G24360	3	8843345	8843388	+	MM123	1	9005190	9005233	44	TTTGTTGAGATAAAGAAGATGAACCCAGGAACAAAGAATTATTG	Y	Y	Y	Y	N	N	Y	Y	Y	Y	GTTGAGATAAAGAAGATGAACCC	8843348	23	N	N	Y	0.714	0	0.857	0.571	0.286	0.143	0.571	0.857	TS
AT3G24360	3	8843345	8843388	+	MM123	1	9005190	9005233	44	TTTGTTGAGATAAAGAAGATGAACCCAGGAACAAAGAATTATTG	Y	Y	Y	Y	N	N	Y	Y	Y	Y	ATAAAGAAGATGAACCCAGGAAC	8843354	23	N	N	Y	0.286	0.429	0.714	0.286	1	0	0.857	0.429	TS
AT3G24360	3	8843345	8843388	+	MM123	1	9005190	9005233	44	TTTGTTGAGATAAAGAAGATGAACCCAGGAACAAAGAATTATTG	Y	Y	Y	Y	N	N	Y	Y	Y	Y	TAAAGAAGATGAACCCAGGAACA	8843355	23	N	N	Y	0.857	0	0.429	0.429	0.286	0.286	1	0.714	TS
AT3G24360	3	8843345	8843388	+	MM123	1	9005190	9005233	44	TTTGTTGAGATAAAGAAGATGAACCCAGGAACAAAGAATTATTG	Y	Y	Y	Y	N	N	Y	Y	Y	Y	AAAGAAGATGAACCCAGGAACAA	8843356	23	N	N	Y	0.286	0.429	0.714	0	1	0.143	0.857	0.571	TS
AT3G24360	3	8843345	8843388	+	MM123	1	9005190	9005233	44	TTTGTTGAGATAAAGAAGATGAACCCAGGAACAAAGAATTATTG	Y	Y	Y	Y	N	N	Y	Y	Y	Y	AAGAAGATGAACCCAGGAACAAA	8843357	23	N	N	Y	0.143	0.286	0.714	0	1	0.429	0.857	0.571	TS
AT3G24360	3	8843345	8843388	+	MM123	1	9005190	9005233	44	TTTGTTGAGATAAAGAAGATGAACCCAGGAACAAAGAATTATTG	Y	Y	Y	Y	N	N	Y	Y	Y	Y	AGAAGATGAACCCAGGAACAAAG	8843358	23	Y	N	Y	0.143	0.286	0.714	0	0.857	0.429	1	0.571	TS
AT3G24360	3	8843345	8843388	+	MM123	1	9005190	9005233	44	TTTGTTGAGATAAAGAAGATGAACCCAGGAACAAAGAATTATTG	Y	Y	Y	Y	N	N	Y	Y	Y	Y	AAGATGAACCCAGGAACAAAGAA	8843360	23	N	N	Y	0.143	0.286	0.714	0	1	0.429	0.857	0.571	TS
AT3G24360	3	8843345	8843388	+	MM123	1	9005190	9005233	44	TTTGTTGAGATAAAGAAGATGAACCCAGGAACAAAGAATTATTG	Y	Y	Y	Y	N	N	Y	Y	Y	Y	AGATGAACCCAGGAACAAAGAAT	8843361	23	N	N	Y	0.286	0.286	0.857	0	1	0.286	0.714	0.571	TS
AT3G24360	3	8843345	8843388	+	MM123	1	9005190	9005233	44	TTTGTTGAGATAAAGAAGATGAACCCAGGAACAAAGAATTATTG	Y	Y	Y	Y	N	N	Y	Y	Y	Y	ATGAACCCAGGAACAAAGAATTA	8843363	23	N	N	Y	0.143	0.286	0.857	0	1	0.429	0.714	0.571	TS
AT3G24360	3	8843345	8843388	+	MM123	1	9005190	9005233	44	TTTGTTGAGATAAAGAAGATGAACCCAGGAACAAAGAATTATTG	Y	Y	Y	Y	N	N	Y	Y	Y	Y	AACCCAGGAACAAAGAATTATTG	8843366	23	N	N	Y	0.143	0.286	0.857	0.143	1	0.429	0.714	0.429	TS
AT3G24360	3	8843345	8843388	+	MM123	1	9005190	9005233	44	TTTGTTGAGATAAAGAAGATGAACCCAGGAACAAAGAATTATTG	Y	Y	Y	Y	N	N	Y	Y	Y	Y	AGATAAAGAAGATGAACCCAGGAA	8843352	24	Y	N	Y	0.143	0.286	0.714	0	0.857	0.429	1	0.571	TS
AT3G24360	3	8843345	8843388	+	MM123	1	9005190	9005233	44	TTTGTTGAGATAAAGAAGATGAACCCAGGAACAAAGAATTATTG	Y	Y	Y	Y	N	N	Y	Y	Y	Y	ATAAAGAAGATGAACCCAGGAACA	8843354	24	Y	N	Y	0.143	0.429	0.714	0.143	1	0.286	0.857	0.429	TS
AT3G24360	3	8843345	8843388	+	MM123	1	9005190	9005233	44	TTTGTTGAGATAAAGAAGATGAACCCAGGAACAAAGAATTATTG	Y	Y	Y	Y	N	N	Y	Y	Y	Y	AAAGAAGATGAACCCAGGAACAAA	8843356	24	N	N	Y	0.143	0.286	0.714	0	1	0.429	0.857	0.571	TS
AT3G24360	3	8843345	8843388	+	MM123	1	9005190	9005233	44	TTTGTTGAGATAAAGAAGATGAACCCAGGAACAAAGAATTATTG	Y	Y	Y	Y	N	N	Y	Y	Y	Y	AAGAAGATGAACCCAGGAACAAAG	8843357	24	N	N	Y	0.143	0.286	0.714	0	0.857	0.429	1	0.571	TS
AT3G24360	3	8843345	8843388	+	MM123	1	9005190	9005233	44	TTTGTTGAGATAAAGAAGATGAACCCAGGAACAAAGAATTATTG	Y	Y	Y	Y	N	N	Y	Y	Y	Y	AGAAGATGAACCCAGGAACAAAGA	8843358	24	N	N	Y	0.143	0.429	0.714	0	0.857	0.286	1	0.571	TS
AT3G24360	3	8843345	8843388	+	MM123	1	9005190	9005233	44	TTTGTTGAGATAAAGAAGATGAACCCAGGAACAAAGAATTATTG	Y	Y	Y	Y	N	N	Y	Y	Y	Y	GAAGATGAACCCAGGAACAAAGAA	8843359	24	N	N	Y	0.571	0.143	1	0	0.429	0.286	0.857	0.714	TS
AT3G24360	3	8843345	8843388	+	MM123	1	9005190	9005233	44	TTTGTTGAGATAAAGAAGATGAACCCAGGAACAAAGAATTATTG	Y	Y	Y	Y	N	N	Y	Y	Y	Y	AAGATGAACCCAGGAACAAAGAAT	8843360	24	Y	N	Y	0.143	0.286	0.857	0	0.857	0.429	0.857	0.571	TS
AT3G24360	3	8843345	8843388	+	MM123	1	9005190	9005233	44	TTTGTTGAGATAAAGAAGATGAACCCAGGAACAAAGAATTATTG	Y	Y	Y	Y	N	N	Y	Y	Y	Y	AGATGAACCCAGGAACAAAGAATT	8843361	24	N	N	Y	0.143	0.286	1	0	0.714	0.429	0.857	0.571	TS
AT3G24360	3	8843345	8843388	+	MM123	1	9005190	9005233	44	TTTGTTGAGATAAAGAAGATGAACCCAGGAACAAAGAATTATTG	Y	Y	Y	Y	N	N	Y	Y	Y	Y	GATGAACCCAGGAACAAAGAATTA	8843362	24	N	N	Y	0.429	0.143	1	0	0.429	0.429	0.714	0.857	TS
AT3G24360	3	8843345	8843388	+	MM123	1	9005190	9005233	44	TTTGTTGAGATAAAGAAGATGAACCCAGGAACAAAGAATTATTG	Y	Y	Y	Y	N	N	Y	Y	Y	Y	ATGAACCCAGGAACAAAGAATTAT	8843363	24	N	N	Y	0.143	0.429	1	0	0.857	0.286	0.714	0.571	TS
AT3G24360	3	8843345	8843388	+	MM123	1	9005190	9005233	44	TTTGTTGAGATAAAGAAGATGAACCCAGGAACAAAGAATTATTG	Y	Y	Y	Y	N	N	Y	Y	Y	Y	GAACCCAGGAACAAAGAATTATTG	8843365	24	N	N	Y	0.429	0.143	1	0	0.286	0.571	0.714	0.857	TS
AT3G24360	3	8843369	8843488	+	MM123	1	12713856	12713975	120	CCAGGAACAAAGAATTATTGCGAACGTACATTGCTGCTGAAGAAGTGTTGATCTTGTTTTTGTACCAAGTTTGGAGCATTGCTCGTGTAAGTAATGAAGTTCTTTTAAGAAGTTTTTTTT	Y	Y	Y	N	N	N	Y	Y	Y	Y	AACAAAGAATTATTGCGAACGT	8843374	22	N	N	Y	0.429	0.714	0.714	0.429	0.857	0.143	0.286	0.429	TS
AT3G24360	3	8843369	8843488	+	MM123	1	12713856	12713975	120	CCAGGAACAAAGAATTATTGCGAACGTACATTGCTGCTGAAGAAGTGTTGATCTTGTTTTTGTACCAAGTTTGGAGCATTGCTCGTGTAAGTAATGAAGTTCTTTTAAGAAGTTTTTTTT	Y	Y	Y	N	N	N	Y	Y	Y	Y	AAAGAATTATTGCGAACGTACA	8843377	22	N	N	Y	0.429	0.571	0.714	0.286	1	0	0.286	0.714	TS
AT3G24360	3	8843369	8843488	+	MM123	1	12713856	12713975	120	CCAGGAACAAAGAATTATTGCGAACGTACATTGCTGCTGAAGAAGTGTTGATCTTGTTTTTGTACCAAGTTTGGAGCATTGCTCGTGTAAGTAATGAAGTTCTTTTAAGAAGTTTTTTTT	Y	Y	Y	N	N	N	Y	Y	Y	Y	AAGAATTATTGCGAACGTACAT	8843378	22	N	N	Y	0.429	0.714	0.571	0.429	0.857	0	0.429	0.571	TS
AT3G24360	3	8843369	8843488	+	MM123	1	12713856	12713975	120	CCAGGAACAAAGAATTATTGCGAACGTACATTGCTGCTGAAGAAGTGTTGATCTTGTTTTTGTACCAAGTTTGGAGCATTGCTCGTGTAAGTAATGAAGTTCTTTTAAGAAGTTTTTTTT	Y	Y	Y	N	N	N	Y	Y	Y	Y	AGGAACAAAGAATTATTGCGAAC	8843371	23	N	N	Y	0	0.286	0.714	0.143	1	0.429	0.714	0.714	TS
AT3G24360	3	8843369	8843488	+	MM123	1	12713856	12713975	120	CCAGGAACAAAGAATTATTGCGAACGTACATTGCTGCTGAAGAAGTGTTGATCTTGTTTTTGTACCAAGTTTGGAGCATTGCTCGTGTAAGTAATGAAGTTCTTTTAAGAAGTTTTTTTT	Y	Y	Y	N	N	N	Y	Y	Y	Y	AACAAAGAATTATTGCGAACGTA	8843374	23	N	N	Y	0.143	0.429	0.857	0.143	1	0.286	0.429	0.714	TS
AT3G24360	3	8843369	8843488	+	MM123	1	12713856	12713975	120	CCAGGAACAAAGAATTATTGCGAACGTACATTGCTGCTGAAGAAGTGTTGATCTTGTTTTTGTACCAAGTTTGGAGCATTGCTCGTGTAAGTAATGAAGTTCTTTTAAGAAGTTTTTTTT	Y	Y	Y	N	N	N	Y	Y	Y	Y	ACAAAGAATTATTGCGAACGTAC	8843375	23	N	N	Y	0.143	0.429	0.714	0.143	1	0.286	0.571	0.714	TS
AT3G24360	3	8843369	8843488	+	MM123	1	12713856	12713975	120	CCAGGAACAAAGAATTATTGCGAACGTACATTGCTGCTGAAGAAGTGTTGATCTTGTTTTTGTACCAAGTTTGGAGCATTGCTCGTGTAAGTAATGAAGTTCTTTTAAGAAGTTTTTTTT	Y	Y	Y	N	N	N	Y	Y	Y	Y	AAAGAATTATTGCGAACGTACAT	8843377	23	N	N	Y	0.143	0.286	0.857	0.143	1	0.286	0.714	0.571	TS
AT3G24360	3	8843369	8843488	+	MM123	1	12713856	12713975	120	CCAGGAACAAAGAATTATTGCGAACGTACATTGCTGCTGAAGAAGTGTTGATCTTGTTTTTGTACCAAGTTTGGAGCATTGCTCGTGTAAGTAATGAAGTTCTTTTAAGAAGTTTTTTTT	Y	Y	Y	N	N	N	Y	Y	Y	Y	AAGAATTATTGCGAACGTACATT	8843378	23	N	N	Y	0.143	0.429	0.857	0.143	1	0.286	0.571	0.571	TS
AT3G24360	3	8843369	8843488	+	MM123	1	12713856	12713975	120	CCAGGAACAAAGAATTATTGCGAACGTACATTGCTGCTGAAGAAGTGTTGATCTTGTTTTTGTACCAAGTTTGGAGCATTGCTCGTGTAAGTAATGAAGTTCTTTTAAGAAGTTTTTTTT	Y	Y	Y	N	N	N	Y	Y	Y	Y	AGAATTATTGCGAACGTACATTG	8843379	23	N	N	Y	0.143	0.429	0.571	0.143	0.857	0.286	0.714	0.857	TS
AT3G24360	3	8843369	8843488	+	MM123	1	12713856	12713975	120	CCAGGAACAAAGAATTATTGCGAACGTACATTGCTGCTGAAGAAGTGTTGATCTTGTTTTTGTACCAAGTTTGGAGCATTGCTCGTGTAAGTAATGAAGTTCTTTTAAGAAGTTTTTTTT	Y	Y	Y	N	N	N	Y	Y	Y	Y	AATTATTGCGAACGTACATTGCT	8843381	23	N	N	Y	0.286	0.714	0.857	0.571	0.714	0.286	0.286	0.286	TS
AT3G24360	3	8843369	8843488	+	MM123	1	12713856	12713975	120	CCAGGAACAAAGAATTATTGCGAACGTACATTGCTGCTGAAGAAGTGTTGATCTTGTTTTTGTACCAAGTTTGGAGCATTGCTCGTGTAAGTAATGAAGTTCTTTTAAGAAGTTTTTTTT	Y	Y	Y	N	N	N	Y	Y	Y	Y	ATTATTGCGAACGTACATTGCTG	8843382	23	N	N	Y	0.286	0.857	1	0.571	0.429	0.286	0.143	0.429	TS
AT3G24360	3	8843369	8843488	+	MM123	1	12713856	12713975	120	CCAGGAACAAAGAATTATTGCGAACGTACATTGCTGCTGAAGAAGTGTTGATCTTGTTTTTGTACCAAGTTTGGAGCATTGCTCGTGTAAGTAATGAAGTTCTTTTAAGAAGTTTTTTTT	Y	Y	Y	N	N	N	Y	Y	Y	Y	ATTGCGAACGTACATTGCTGCTG	8843385	23	N	N	Y	0.571	0.857	1	0.429	0.429	0.429	0.286	0	TS
AT3G24360	3	8843369	8843488	+	MM123	1	12713856	12713975	120	CCAGGAACAAAGAATTATTGCGAACGTACATTGCTGCTGAAGAAGTGTTGATCTTGTTTTTGTACCAAGTTTGGAGCATTGCTCGTGTAAGTAATGAAGTTCTTTTAAGAAGTTTTTTTT	Y	Y	Y	N	N	N	Y	Y	Y	Y	ACGTACATTGCTGCTGAAGAAGT	8843392	23	N	N	Y	0.429	0.571	0.714	0.286	1	0.286	0.571	0.143	TS
AT3G24360	3	8843369	8843488	+	MM123	1	12713856	12713975	120	CCAGGAACAAAGAATTATTGCGAACGTACATTGCTGCTGAAGAAGTGTTGATCTTGTTTTTGTACCAAGTTTGGAGCATTGCTCGTGTAAGTAATGAAGTTCTTTTAAGAAGTTTTTTTT	Y	Y	Y	N	N	N	Y	Y	Y	Y	AGGAACAAAGAATTATTGCGAACG	8843371	24	N	N	Y	0	0.286	0.857	0.143	0.714	0.429	1	0.571	TS
AT3G24360	3	8843369	8843488	+	MM123	1	12713856	12713975	120	CCAGGAACAAAGAATTATTGCGAACGTACATTGCTGCTGAAGAAGTGTTGATCTTGTTTTTGTACCAAGTTTGGAGCATTGCTCGTGTAAGTAATGAAGTTCTTTTAAGAAGTTTTTTTT	Y	Y	Y	N	N	N	Y	Y	Y	Y	GGAACAAAGAATTATTGCGAACGT	8843372	24	N	N	Y	0.429	0.143	1	0.143	0.143	0.571	0.714	0.857	TS
AT3G24360	3	8843369	8843488	+	MM123	1	12713856	12713975	120	CCAGGAACAAAGAATTATTGCGAACGTACATTGCTGCTGAAGAAGTGTTGATCTTGTTTTTGTACCAAGTTTGGAGCATTGCTCGTGTAAGTAATGAAGTTCTTTTAAGAAGTTTTTTTT	Y	Y	Y	N	N	N	Y	Y	Y	Y	GAACAAAGAATTATTGCGAACGTA	8843373	24	N	N	Y	0.571	0.143	1	0	0.429	0.286	0.714	0.857	TS
AT3G24360	3	8843369	8843488	+	MM123	1	12713856	12713975	120	CCAGGAACAAAGAATTATTGCGAACGTACATTGCTGCTGAAGAAGTGTTGATCTTGTTTTTGTACCAAGTTTGGAGCATTGCTCGTGTAAGTAATGAAGTTCTTTTAAGAAGTTTTTTTT	Y	Y	Y	N	N	N	Y	Y	Y	Y	AACAAAGAATTATTGCGAACGTAC	8843374	24	N	N	Y	0	0.429	0.714	0.143	1	0.286	0.857	0.571	TS
AT3G24360	3	8843369	8843488	+	MM123	1	12713856	12713975	120	CCAGGAACAAAGAATTATTGCGAACGTACATTGCTGCTGAAGAAGTGTTGATCTTGTTTTTGTACCAAGTTTGGAGCATTGCTCGTGTAAGTAATGAAGTTCTTTTAAGAAGTTTTTTTT	Y	Y	Y	N	N	N	Y	Y	Y	Y	ACAAAGAATTATTGCGAACGTACA	8843375	24	N	N	Y	0.143	0.429	0.714	0.143	0.857	0.143	1	0.571	TS
AT3G24360	3	8843369	8843488	+	MM123	1	12713856	12713975	120	CCAGGAACAAAGAATTATTGCGAACGTACATTGCTGCTGAAGAAGTGTTGATCTTGTTTTTGTACCAAGTTTGGAGCATTGCTCGTGTAAGTAATGAAGTTCTTTTAAGAAGTTTTTTTT	Y	Y	Y	N	N	N	Y	Y	Y	Y	AAAGAATTATTGCGAACGTACATT	8843377	24	N	N	Y	0.143	0.286	0.857	0.143	1	0.286	0.714	0.571	TS
AT3G24360	3	8843369	8843488	+	MM123	1	12713856	12713975	120	CCAGGAACAAAGAATTATTGCGAACGTACATTGCTGCTGAAGAAGTGTTGATCTTGTTTTTGTACCAAGTTTGGAGCATTGCTCGTGTAAGTAATGAAGTTCTTTTAAGAAGTTTTTTTT	Y	Y	Y	N	N	N	Y	Y	Y	Y	AAGAATTATTGCGAACGTACATTG	8843378	24	N	N	Y	0	0.286	1	0.143	0.714	0.429	0.857	0.571	TS
AT3G24360	3	8843369	8843488	+	MM123	1	12713856	12713975	120	CCAGGAACAAAGAATTATTGCGAACGTACATTGCTGCTGAAGAAGTGTTGATCTTGTTTTTGTACCAAGTTTGGAGCATTGCTCGTGTAAGTAATGAAGTTCTTTTAAGAAGTTTTTTTT	Y	Y	Y	N	N	N	Y	Y	Y	Y	AGAATTATTGCGAACGTACATTGC	8843379	24	N	N	Y	0	0.429	0.857	0.143	0.857	0.286	0.857	0.571	TS
AT3G24360	3	8843369	8843488	+	MM123	1	12713856	12713975	120	CCAGGAACAAAGAATTATTGCGAACGTACATTGCTGCTGAAGAAGTGTTGATCTTGTTTTTGTACCAAGTTTGGAGCATTGCTCGTGTAAGTAATGAAGTTCTTTTAAGAAGTTTTTTTT	Y	Y	Y	N	N	N	Y	Y	Y	Y	GAATTATTGCGAACGTACATTGCT	8843380	24	N	N	Y	0.571	0.286	1	0.143	0.143	0.429	0.571	0.857	TS
AT3G24360	3	8843369	8843488	+	MM123	1	12713856	12713975	120	CCAGGAACAAAGAATTATTGCGAACGTACATTGCTGCTGAAGAAGTGTTGATCTTGTTTTTGTACCAAGTTTGGAGCATTGCTCGTGTAAGTAATGAAGTTCTTTTAAGAAGTTTTTTTT	Y	Y	Y	N	N	N	Y	Y	Y	Y	AATTATTGCGAACGTACATTGCTG	8843381	24	N	N	Y	0	0.429	1	0.143	0.714	0.429	0.857	0.429	TS
AT3G24360	3	8843369	8843488	+	MM123	1	12713856	12713975	120	CCAGGAACAAAGAATTATTGCGAACGTACATTGCTGCTGAAGAAGTGTTGATCTTGTTTTTGTACCAAGTTTGGAGCATTGCTCGTGTAAGTAATGAAGTTCTTTTAAGAAGTTTTTTTT	Y	Y	Y	N	N	N	Y	Y	Y	Y	ATTATTGCGAACGTACATTGCTGC	8843382	24	N	N	Y	0	0.857	1	0.143	0.571	0.286	0.714	0.429	TS
AT3G24360	3	8843369	8843488	+	MM123	1	12713856	12713975	120	CCAGGAACAAAGAATTATTGCGAACGTACATTGCTGCTGAAGAAGTGTTGATCTTGTTTTTGTACCAAGTTTGGAGCATTGCTCGTGTAAGTAATGAAGTTCTTTTAAGAAGTTTTTTTT	Y	Y	Y	N	N	N	Y	Y	Y	Y	ATTGCGAACGTACATTGCTGCTGA	8843385	24	N	N	Y	0.143	0.857	1	0	0.571	0.286	0.714	0.429	TS
AT3G24360	3	8843369	8843488	+	MM123	1	12713856	12713975	120	CCAGGAACAAAGAATTATTGCGAACGTACATTGCTGCTGAAGAAGTGTTGATCTTGTTTTTGTACCAAGTTTGGAGCATTGCTCGTGTAAGTAATGAAGTTCTTTTAAGAAGTTTTTTTT	Y	Y	Y	N	N	N	Y	Y	Y	Y	GCGAACGTACATTGCTGCTGAAGA	8843388	24	N	N	Y	0.571	0.286	1	0.143	0.143	0.286	0.714	0.857	TS
AT3G24360	3	8843369	8843488	+	MM123	1	12713856	12713975	120	CCAGGAACAAAGAATTATTGCGAACGTACATTGCTGCTGAAGAAGTGTTGATCTTGTTTTTGTACCAAGTTTGGAGCATTGCTCGTGTAAGTAATGAAGTTCTTTTAAGAAGTTTTTTTT	Y	Y	Y	N	N	N	Y	Y	Y	Y	GAACGTACATTGCTGCTGAAGAAG	8843390	24	N	N	Y	0.571	0	1	0.429	0.286	0.143	0.857	0.714	TS
AT3G24360	3	8843369	8843488	+	MM123	1	12713856	12713975	120	CCAGGAACAAAGAATTATTGCGAACGTACATTGCTGCTGAAGAAGTGTTGATCTTGTTTTTGTACCAAGTTTGGAGCATTGCTCGTGTAAGTAATGAAGTTCTTTTAAGAAGTTTTTTTT	Y	Y	Y	N	N	N	Y	Y	Y	Y	AACGTACATTGCTGCTGAAGAAGT	8843391	24	N	N	Y	0.429	0.429	1	0.143	0.714	0.286	0.857	0.143	TS
AT3G24360	3	8843369	8843488	+	MM123	1	12713856	12713975	120	CCAGGAACAAAGAATTATTGCGAACGTACATTGCTGCTGAAGAAGTGTTGATCTTGTTTTTGTACCAAGTTTGGAGCATTGCTCGTGTAAGTAATGAAGTTCTTTTAAGAAGTTTTTTTT	Y	Y	Y	N	N	N	Y	Y	Y	Y	ACGTACATTGCTGCTGAAGAAGTG	8843392	24	N	N	Y	0.429	0.429	0.857	0	0.714	0.286	1	0.286	TS
AT3G24360	3	8843369	8843488	+	MM123	1	12713856	12713975	120	CCAGGAACAAAGAATTATTGCGAACGTACATTGCTGCTGAAGAAGTGTTGATCTTGTTTTTGTACCAAGTTTGGAGCATTGCTCGTGTAAGTAATGAAGTTCTTTTAAGAAGTTTTTTTT	Y	Y	Y	N	N	N	Y	Y	Y	Y	ACATTGCTGCTGAAGAAGTGTTGA	8843396	24	N	N	Y	0.286	0.714	0.857	0	0.714	0.429	0.857	0.143	TS
AT3G24360	3	8843369	8843488	+	MM123	1	12713856	12713975	120	CCAGGAACAAAGAATTATTGCGAACGTACATTGCTGCTGAAGAAGTGTTGATCTTGTTTTTGTACCAAGTTTGGAGCATTGCTCGTGTAAGTAATGAAGTTCTTTTAAGAAGTTTTTTTT	Y	Y	Y	N	N	N	Y	Y	Y	Y	ATCTTGTTTTTGTACCAAGTTTGG	8843419	24	N	N	Y	0	0.857	1	0.143	0.429	0.714	0.571	0.286	TS
AT3G24360	3	8843369	8843488	+	MM123	1	12713856	12713975	120	CCAGGAACAAAGAATTATTGCGAACGTACATTGCTGCTGAAGAAGTGTTGATCTTGTTTTTGTACCAAGTTTGGAGCATTGCTCGTGTAAGTAATGAAGTTCTTTTAAGAAGTTTTTTTT	Y	Y	Y	N	N	N	Y	Y	Y	Y	GTTTTTGTACCAAGTTTGGAGCAT	8843424	24	N	N	Y	0.429	0.286	0.857	0	0.143	0.857	0.714	0.714	TS
AT3G24360	3	8843369	8843488	+	MM123	1	12713856	12713975	120	CCAGGAACAAAGAATTATTGCGAACGTACATTGCTGCTGAAGAAGTGTTGATCTTGTTTTTGTACCAAGTTTGGAGCATTGCTCGTGTAAGTAATGAAGTTCTTTTAAGAAGTTTTTTTT	Y	Y	Y	N	N	N	Y	Y	Y	Y	AAGTTTGGAGCATTGCTCGTGTAA	8843435	24	N	N	Y	0	0.429	0.857	0.143	1	0.571	0.714	0.286	TS
AT3G24360	3	8843369	8843488	+	MM123	1	12713856	12713975	120	CCAGGAACAAAGAATTATTGCGAACGTACATTGCTGCTGAAGAAGTGTTGATCTTGTTTTTGTACCAAGTTTGGAGCATTGCTCGTGTAAGTAATGAAGTTCTTTTAAGAAGTTTTTTTT	Y	Y	Y	N	N	N	Y	Y	Y	Y	AGTTTGGAGCATTGCTCGTGTAAG	8843436	24	N	N	Y	0.143	0.571	0.857	0.143	0.429	0.714	1	0.143	TS
AT3G24360	3	8843369	8843488	+	MM123	1	12713856	12713975	120	CCAGGAACAAAGAATTATTGCGAACGTACATTGCTGCTGAAGAAGTGTTGATCTTGTTTTTGTACCAAGTTTGGAGCATTGCTCGTGTAAGTAATGAAGTTCTTTTAAGAAGTTTTTTTT	Y	Y	Y	N	N	N	Y	Y	Y	Y	GTTTGGAGCATTGCTCGTGTAAGT	8843437	24	N	N	Y	0.571	0.429	1	0.143	0	0.857	0.571	0.429	TS
AT3G24360	3	8843369	8843488	+	MM123	1	12713856	12713975	120	CCAGGAACAAAGAATTATTGCGAACGTACATTGCTGCTGAAGAAGTGTTGATCTTGTTTTTGTACCAAGTTTGGAGCATTGCTCGTGTAAGTAATGAAGTTCTTTTAAGAAGTTTTTTTT	Y	Y	Y	N	N	N	Y	Y	Y	Y	GGAGCATTGCTCGTGTAAGTAATG	8843441	24	N	N	Y	0.571	0.286	1	0.143	0	0.571	0.714	0.714	TS
AT3G24360	3	8843369	8843488	+	MM123	1	12713856	12713975	120	CCAGGAACAAAGAATTATTGCGAACGTACATTGCTGCTGAAGAAGTGTTGATCTTGTTTTTGTACCAAGTTTGGAGCATTGCTCGTGTAAGTAATGAAGTTCTTTTAAGAAGTTTTTTTT	Y	Y	Y	N	N	N	Y	Y	Y	Y	GAGCATTGCTCGTGTAAGTAATGA	8843442	24	N	N	Y	0.571	0.286	1	0	0.286	0.429	0.571	0.857	TS
AT3G24360	3	8843369	8843488	+	MM123	1	12713856	12713975	120	CCAGGAACAAAGAATTATTGCGAACGTACATTGCTGCTGAAGAAGTGTTGATCTTGTTTTTGTACCAAGTTTGGAGCATTGCTCGTGTAAGTAATGAAGTTCTTTTAAGAAGTTTTTTTT	Y	Y	Y	N	N	N	Y	Y	Y	Y	AGCATTGCTCGTGTAAGTAATGAA	8843443	24	Y	N	Y	0.143	0.429	0.857	0	0.714	0.286	1	0.571	TS
AT3G24360	3	8843369	8843488	+	MM123	1	12713856	12713975	120	CCAGGAACAAAGAATTATTGCGAACGTACATTGCTGCTGAAGAAGTGTTGATCTTGTTTTTGTACCAAGTTTGGAGCATTGCTCGTGTAAGTAATGAAGTTCTTTTAAGAAGTTTTTTTT	Y	Y	Y	N	N	N	Y	Y	Y	Y	GCATTGCTCGTGTAAGTAATGAAG	8843444	24	N	N	Y	0.571	0.286	0.857	0.143	0	0.571	0.857	0.714	TS
AT3G24360	3	8843369	8843488	+	MM123	1	12713856	12713975	120	CCAGGAACAAAGAATTATTGCGAACGTACATTGCTGCTGAAGAAGTGTTGATCTTGTTTTTGTACCAAGTTTGGAGCATTGCTCGTGTAAGTAATGAAGTTCTTTTAAGAAGTTTTTTTT	Y	Y	Y	N	N	N	Y	Y	Y	Y	ATTGCTCGTGTAAGTAATGAAGTT	8843446	24	N	N	Y	0.286	0.571	1	0.143	0.714	0.429	0.857	0	TS
AT3G24360	3	8843369	8843488	+	MM123	1	12713856	12713975	120	CCAGGAACAAAGAATTATTGCGAACGTACATTGCTGCTGAAGAAGTGTTGATCTTGTTTTTGTACCAAGTTTGGAGCATTGCTCGTGTAAGTAATGAAGTTCTTTTAAGAAGTTTTTTTT	Y	Y	Y	N	N	N	Y	Y	Y	Y	GCTCGTGTAAGTAATGAAGTTCTT	8843449	24	N	N	Y	0.571	0.429	1	0.286	0	0.286	0.571	0.857	TS
AT3G24360	3	8843369	8843488	+	MM123	1	12713856	12713975	120	CCAGGAACAAAGAATTATTGCGAACGTACATTGCTGCTGAAGAAGTGTTGATCTTGTTTTTGTACCAAGTTTGGAGCATTGCTCGTGTAAGTAATGAAGTTCTTTTAAGAAGTTTTTTTT	Y	Y	Y	N	N	N	Y	Y	Y	Y	GTAAGTAATGAAGTTCTTTTAAGA	8843455	24	N	N	Y	0.571	0	0.857	0.286	0.286	0.286	0.857	0.857	TS
AT3G24360	3	8843390	8843699	+	MM123	1	9005235	9005544	310	GAACGTACATTGCTGCTGAAGAAGTGTTGATCTTGTTTTTGTACCAAGTTTGGAGCATTGCTCGTGTAAGTAATGAAGTTCTTTTAAGAAGTTTTTTTTATGTCATATTAGGATCTTGATTGTGTTCGAACTCCATTTTTTTATCAGAATATTTGCAAAATCTATATTTGTTTGTTTAAAATAGTCAAATGATAATTGGTATTTAGGTTTATAAATGTGTAGTATCGACATTCCATTTGTTTTTTATATGTATAGTATTTTTCAGTTGCATTTAATGTGTGTCTCCTGAATTTATGATGCAGGTGGGTTA	Y	Y	Y	Y	N	N	Y	Y	Y	Y	ATTTTTTTATCAGAATATTTGCA	8843524	23	N	N	Y	0	0.857	0.286	0.286	1	0.571	0.286	0.714	TS
AT3G24360	3	8843390	8843699	+	MM123	1	9005235	9005544	310	GAACGTACATTGCTGCTGAAGAAGTGTTGATCTTGTTTTTGTACCAAGTTTGGAGCATTGCTCGTGTAAGTAATGAAGTTCTTTTAAGAAGTTTTTTTTATGTCATATTAGGATCTTGATTGTGTTCGAACTCCATTTTTTTATCAGAATATTTGCAAAATCTATATTTGTTTGTTTAAAATAGTCAAATGATAATTGGTATTTAGGTTTATAAATGTGTAGTATCGACATTCCATTTGTTTTTTATATGTATAGTATTTTTCAGTTGCATTTAATGTGTGTCTCCTGAATTTATGATGCAGGTGGGTTA	Y	Y	Y	Y	N	N	Y	Y	Y	Y	ATCAGAATATTTGCAAAATCTAT	8843532	23	N	N	Y	0	0.286	0.571	0.143	1	0.429	0.857	0.714	TS
AT3G24360	3	8843390	8843699	+	MM123	1	9005235	9005544	310	GAACGTACATTGCTGCTGAAGAAGTGTTGATCTTGTTTTTGTACCAAGTTTGGAGCATTGCTCGTGTAAGTAATGAAGTTCTTTTAAGAAGTTTTTTTTATGTCATATTAGGATCTTGATTGTGTTCGAACTCCATTTTTTTATCAGAATATTTGCAAAATCTATATTTGTTTGTTTAAAATAGTCAAATGATAATTGGTATTTAGGTTTATAAATGTGTAGTATCGACATTCCATTTGTTTTTTATATGTATAGTATTTTTCAGTTGCATTTAATGTGTGTCTCCTGAATTTATGATGCAGGTGGGTTA	Y	Y	Y	Y	N	N	Y	Y	Y	Y	AATATTTGCAAAATCTATATTTG	8843537	23	N	N	Y	0.143	0.429	0.571	0.286	1	0.286	0.429	0.857	TS
AT3G24360	3	8843390	8843699	+	MM123	1	9005235	9005544	310	GAACGTACATTGCTGCTGAAGAAGTGTTGATCTTGTTTTTGTACCAAGTTTGGAGCATTGCTCGTGTAAGTAATGAAGTTCTTTTAAGAAGTTTTTTTTATGTCATATTAGGATCTTGATTGTGTTCGAACTCCATTTTTTTATCAGAATATTTGCAAAATCTATATTTGTTTGTTTAAAATAGTCAAATGATAATTGGTATTTAGGTTTATAAATGTGTAGTATCGACATTCCATTTGTTTTTTATATGTATAGTATTTTTCAGTTGCATTTAATGTGTGTCTCCTGAATTTATGATGCAGGTGGGTTA	Y	Y	Y	Y	N	N	Y	Y	Y	Y	AAAATAGTCAAATGATAATTGGT	8843567	23	N	N	Y	0.429	0.429	1	0.429	0.857	0.143	0.286	0.429	TS
AT3G24360	3	8843390	8843699	+	MM123	1	9005235	9005544	310	GAACGTACATTGCTGCTGAAGAAGTGTTGATCTTGTTTTTGTACCAAGTTTGGAGCATTGCTCGTGTAAGTAATGAAGTTCTTTTAAGAAGTTTTTTTTATGTCATATTAGGATCTTGATTGTGTTCGAACTCCATTTTTTTATCAGAATATTTGCAAAATCTATATTTGTTTGTTTAAAATAGTCAAATGATAATTGGTATTTAGGTTTATAAATGTGTAGTATCGACATTCCATTTGTTTTTTATATGTATAGTATTTTTCAGTTGCATTTAATGTGTGTCTCCTGAATTTATGATGCAGGTGGGTTA	Y	Y	Y	Y	N	N	Y	Y	Y	Y	AAATAGTCAAATGATAATTGGTA	8843568	23	N	N	Y	0.286	0.429	0.714	0.143	1	0.429	0.286	0.714	TS
AT3G24360	3	8843390	8843699	+	MM123	1	9005235	9005544	310	GAACGTACATTGCTGCTGAAGAAGTGTTGATCTTGTTTTTGTACCAAGTTTGGAGCATTGCTCGTGTAAGTAATGAAGTTCTTTTAAGAAGTTTTTTTTATGTCATATTAGGATCTTGATTGTGTTCGAACTCCATTTTTTTATCAGAATATTTGCAAAATCTATATTTGTTTGTTTAAAATAGTCAAATGATAATTGGTATTTAGGTTTATAAATGTGTAGTATCGACATTCCATTTGTTTTTTATATGTATAGTATTTTTCAGTTGCATTTAATGTGTGTCTCCTGAATTTATGATGCAGGTGGGTTA	Y	Y	Y	Y	N	N	Y	Y	Y	Y	ATAGTATTTTTCAGTTGCATTTA	8843641	23	N	N	Y	0.286	0.857	0.286	0.286	1	0.429	0.143	0.714	TS
AT3G24360	3	8843390	8843699	+	MM123	1	9005235	9005544	310	GAACGTACATTGCTGCTGAAGAAGTGTTGATCTTGTTTTTGTACCAAGTTTGGAGCATTGCTCGTGTAAGTAATGAAGTTCTTTTAAGAAGTTTTTTTTATGTCATATTAGGATCTTGATTGTGTTCGAACTCCATTTTTTTATCAGAATATTTGCAAAATCTATATTTGTTTGTTTAAAATAGTCAAATGATAATTGGTATTTAGGTTTATAAATGTGTAGTATCGACATTCCATTTGTTTTTTATATGTATAGTATTTTTCAGTTGCATTTAATGTGTGTCTCCTGAATTTATGATGCAGGTGGGTTA	Y	Y	Y	Y	N	N	Y	Y	Y	Y	AGGATCTTGATTGTGTTCGAACTC	8843499	24	Y	N	Y	0.143	0.714	1	0	0.429	0.714	0.714	0.286	TS
AT3G24360	3	8843390	8843699	+	MM123	1	9005235	9005544	310	GAACGTACATTGCTGCTGAAGAAGTGTTGATCTTGTTTTTGTACCAAGTTTGGAGCATTGCTCGTGTAAGTAATGAAGTTCTTTTAAGAAGTTTTTTTTATGTCATATTAGGATCTTGATTGTGTTCGAACTCCATTTTTTTATCAGAATATTTGCAAAATCTATATTTGTTTGTTTAAAATAGTCAAATGATAATTGGTATTTAGGTTTATAAATGTGTAGTATCGACATTCCATTTGTTTTTTATATGTATAGTATTTTTCAGTTGCATTTAATGTGTGTCTCCTGAATTTATGATGCAGGTGGGTTA	Y	Y	Y	Y	N	N	Y	Y	Y	Y	AACTCCATTTTTTTATCAGAATAT	8843518	24	N	N	Y	0.143	0.286	0.571	0	1	0.429	0.857	0.714	TS
AT3G24360	3	8843390	8843699	+	MM123	1	9005235	9005544	310	GAACGTACATTGCTGCTGAAGAAGTGTTGATCTTGTTTTTGTACCAAGTTTGGAGCATTGCTCGTGTAAGTAATGAAGTTCTTTTAAGAAGTTTTTTTTATGTCATATTAGGATCTTGATTGTGTTCGAACTCCATTTTTTTATCAGAATATTTGCAAAATCTATATTTGTTTGTTTAAAATAGTCAAATGATAATTGGTATTTAGGTTTATAAATGTGTAGTATCGACATTCCATTTGTTTTTTATATGTATAGTATTTTTCAGTTGCATTTAATGTGTGTCTCCTGAATTTATGATGCAGGTGGGTTA	Y	Y	Y	Y	N	N	Y	Y	Y	Y	ATCAGAATATTTGCAAAATCTATA	8843532	24	N	N	Y	0	0.429	0.571	0.143	1	0.286	0.857	0.714	TS
AT3G24360	3	8843390	8843699	+	MM123	1	9005235	9005544	310	GAACGTACATTGCTGCTGAAGAAGTGTTGATCTTGTTTTTGTACCAAGTTTGGAGCATTGCTCGTGTAAGTAATGAAGTTCTTTTAAGAAGTTTTTTTTATGTCATATTAGGATCTTGATTGTGTTCGAACTCCATTTTTTTATCAGAATATTTGCAAAATCTATATTTGTTTGTTTAAAATAGTCAAATGATAATTGGTATTTAGGTTTATAAATGTGTAGTATCGACATTCCATTTGTTTTTTATATGTATAGTATTTTTCAGTTGCATTTAATGTGTGTCTCCTGAATTTATGATGCAGGTGGGTTA	Y	Y	Y	Y	N	N	Y	Y	Y	Y	AGAATATTTGCAAAATCTATATTT	8843535	24	N	N	Y	0	0.286	0.571	0.143	0.714	0.429	1	0.857	TS
AT3G24360	3	8843390	8843699	+	MM123	1	9005235	9005544	310	GAACGTACATTGCTGCTGAAGAAGTGTTGATCTTGTTTTTGTACCAAGTTTGGAGCATTGCTCGTGTAAGTAATGAAGTTCTTTTAAGAAGTTTTTTTTATGTCATATTAGGATCTTGATTGTGTTCGAACTCCATTTTTTTATCAGAATATTTGCAAAATCTATATTTGTTTGTTTAAAATAGTCAAATGATAATTGGTATTTAGGTTTATAAATGTGTAGTATCGACATTCCATTTGTTTTTTATATGTATAGTATTTTTCAGTTGCATTTAATGTGTGTCTCCTGAATTTATGATGCAGGTGGGTTA	Y	Y	Y	Y	N	N	Y	Y	Y	Y	AATATTTGCAAAATCTATATTTGT	8843537	24	N	N	Y	0	0.429	0.714	0.143	0.857	0.286	1	0.571	TS
AT3G24360	3	8843390	8843699	+	MM123	1	9005235	9005544	310	GAACGTACATTGCTGCTGAAGAAGTGTTGATCTTGTTTTTGTACCAAGTTTGGAGCATTGCTCGTGTAAGTAATGAAGTTCTTTTAAGAAGTTTTTTTTATGTCATATTAGGATCTTGATTGTGTTCGAACTCCATTTTTTTATCAGAATATTTGCAAAATCTATATTTGTTTGTTTAAAATAGTCAAATGATAATTGGTATTTAGGTTTATAAATGTGTAGTATCGACATTCCATTTGTTTTTTATATGTATAGTATTTTTCAGTTGCATTTAATGTGTGTCTCCTGAATTTATGATGCAGGTGGGTTA	Y	Y	Y	Y	N	N	Y	Y	Y	Y	ATATTTGTTTGTTTAAAATAGTCA	8843553	24	N	N	Y	0	0.571	0.857	0.143	1	0.286	0.571	0.571	TS
AT3G24360	3	8843390	8843699	+	MM123	1	9005235	9005544	310	GAACGTACATTGCTGCTGAAGAAGTGTTGATCTTGTTTTTGTACCAAGTTTGGAGCATTGCTCGTGTAAGTAATGAAGTTCTTTTAAGAAGTTTTTTTTATGTCATATTAGGATCTTGATTGTGTTCGAACTCCATTTTTTTATCAGAATATTTGCAAAATCTATATTTGTTTGTTTAAAATAGTCAAATGATAATTGGTATTTAGGTTTATAAATGTGTAGTATCGACATTCCATTTGTTTTTTATATGTATAGTATTTTTCAGTTGCATTTAATGTGTGTCTCCTGAATTTATGATGCAGGTGGGTTA	Y	Y	Y	Y	N	N	Y	Y	Y	Y	AAAATAGTCAAATGATAATTGGTA	8843567	24	N	N	Y	0.143	0.286	0.857	0	1	0.429	0.714	0.571	TS
AT3G24360	3	8843390	8843699	+	MM123	1	9005235	9005544	310	GAACGTACATTGCTGCTGAAGAAGTGTTGATCTTGTTTTTGTACCAAGTTTGGAGCATTGCTCGTGTAAGTAATGAAGTTCTTTTAAGAAGTTTTTTTTATGTCATATTAGGATCTTGATTGTGTTCGAACTCCATTTTTTTATCAGAATATTTGCAAAATCTATATTTGTTTGTTTAAAATAGTCAAATGATAATTGGTATTTAGGTTTATAAATGTGTAGTATCGACATTCCATTTGTTTTTTATATGTATAGTATTTTTCAGTTGCATTTAATGTGTGTCTCCTGAATTTATGATGCAGGTGGGTTA	Y	Y	Y	Y	N	N	Y	Y	Y	Y	ATAGTATTTTTCAGTTGCATTTAA	8843641	24	N	N	Y	0	0.571	0.429	0.143	1	0.286	0.714	0.857	TS
AT3G24360	3	8843390	8843699	+	MM123	1	9005235	9005544	310	GAACGTACATTGCTGCTGAAGAAGTGTTGATCTTGTTTTTGTACCAAGTTTGGAGCATTGCTCGTGTAAGTAATGAAGTTCTTTTAAGAAGTTTTTTTTATGTCATATTAGGATCTTGATTGTGTTCGAACTCCATTTTTTTATCAGAATATTTGCAAAATCTATATTTGTTTGTTTAAAATAGTCAAATGATAATTGGTATTTAGGTTTATAAATGTGTAGTATCGACATTCCATTTGTTTTTTATATGTATAGTATTTTTCAGTTGCATTTAATGTGTGTCTCCTGAATTTATGATGCAGGTGGGTTA	Y	Y	Y	Y	N	N	Y	Y	Y	Y	AGTTGCATTTAATGTGTGTCTCCT	8843653	24	N	N	Y	0.143	0.571	1	0.143	0.429	0.714	0.857	0.143	TS
AT3G24360	3	8843390	8843699	+	MM123	1	9005235	9005544	310	GAACGTACATTGCTGCTGAAGAAGTGTTGATCTTGTTTTTGTACCAAGTTTGGAGCATTGCTCGTGTAAGTAATGAAGTTCTTTTAAGAAGTTTTTTTTATGTCATATTAGGATCTTGATTGTGTTCGAACTCCATTTTTTTATCAGAATATTTGCAAAATCTATATTTGTTTGTTTAAAATAGTCAAATGATAATTGGTATTTAGGTTTATAAATGTGTAGTATCGACATTCCATTTGTTTTTTATATGTATAGTATTTTTCAGTTGCATTTAATGTGTGTCTCCTGAATTTATGATGCAGGTGGGTTA	Y	Y	Y	Y	N	N	Y	Y	Y	Y	GTTGCATTTAATGTGTGTCTCCTG	8843654	24	N	N	Y	0.429	0.429	1	0.286	0	0.857	0.286	0.714	TS
AT3G24360	3	8843390	8843699	+	MM123	1	9005235	9005544	310	GAACGTACATTGCTGCTGAAGAAGTGTTGATCTTGTTTTTGTACCAAGTTTGGAGCATTGCTCGTGTAAGTAATGAAGTTCTTTTAAGAAGTTTTTTTTATGTCATATTAGGATCTTGATTGTGTTCGAACTCCATTTTTTTATCAGAATATTTGCAAAATCTATATTTGTTTGTTTAAAATAGTCAAATGATAATTGGTATTTAGGTTTATAAATGTGTAGTATCGACATTCCATTTGTTTTTTATATGTATAGTATTTTTCAGTTGCATTTAATGTGTGTCTCCTGAATTTATGATGCAGGTGGGTTA	Y	Y	Y	Y	N	N	Y	Y	Y	Y	ATTTAATGTGTGTCTCCTGAATTT	8843659	24	N	N	Y	0.143	0.857	1	0	0.571	0.571	0.571	0.286	TS
AT3G24360	3	8843390	8843699	+	MM123	1	9005235	9005544	310	GAACGTACATTGCTGCTGAAGAAGTGTTGATCTTGTTTTTGTACCAAGTTTGGAGCATTGCTCGTGTAAGTAATGAAGTTCTTTTAAGAAGTTTTTTTTATGTCATATTAGGATCTTGATTGTGTTCGAACTCCATTTTTTTATCAGAATATTTGCAAAATCTATATTTGTTTGTTTAAAATAGTCAAATGATAATTGGTATTTAGGTTTATAAATGTGTAGTATCGACATTCCATTTGTTTTTTATATGTATAGTATTTTTCAGTTGCATTTAATGTGTGTCTCCTGAATTTATGATGCAGGTGGGTTA	Y	Y	Y	Y	N	N	Y	Y	Y	Y	ATGTGTGTCTCCTGAATTTATGAT	8843664	24	N	N	Y	0.143	0.714	1	0	0.571	0.714	0.571	0.286	TS
AT3G24360	3	8843390	8843699	+	MM123	1	9005235	9005544	310	GAACGTACATTGCTGCTGAAGAAGTGTTGATCTTGTTTTTGTACCAAGTTTGGAGCATTGCTCGTGTAAGTAATGAAGTTCTTTTAAGAAGTTTTTTTTATGTCATATTAGGATCTTGATTGTGTTCGAACTCCATTTTTTTATCAGAATATTTGCAAAATCTATATTTGTTTGTTTAAAATAGTCAAATGATAATTGGTATTTAGGTTTATAAATGTGTAGTATCGACATTCCATTTGTTTTTTATATGTATAGTATTTTTCAGTTGCATTTAATGTGTGTCTCCTGAATTTATGATGCAGGTGGGTTA	Y	Y	Y	Y	N	N	Y	Y	Y	Y	GTGTGTCTCCTGAATTTATGATGC	8843666	24	Y	N	Y	0.429	0.429	1	0.143	0	0.857	0.429	0.714	TS
AT3G24360	3	8843390	8843699	+	MM123	1	9005235	9005544	310	GAACGTACATTGCTGCTGAAGAAGTGTTGATCTTGTTTTTGTACCAAGTTTGGAGCATTGCTCGTGTAAGTAATGAAGTTCTTTTAAGAAGTTTTTTTTATGTCATATTAGGATCTTGATTGTGTTCGAACTCCATTTTTTTATCAGAATATTTGCAAAATCTATATTTGTTTGTTTAAAATAGTCAAATGATAATTGGTATTTAGGTTTATAAATGTGTAGTATCGACATTCCATTTGTTTTTTATATGTATAGTATTTTTCAGTTGCATTTAATGTGTGTCTCCTGAATTTATGATGCAGGTGGGTTA	Y	Y	Y	Y	N	N	Y	Y	Y	Y	GTGTCTCCTGAATTTATGATGCAG	8843668	24	N	N	Y	0.429	0.286	0.857	0.143	0	0.857	0.714	0.714	TS
AT3G24360	3	8843390	8843699	+	MM123	1	9005235	9005544	310	GAACGTACATTGCTGCTGAAGAAGTGTTGATCTTGTTTTTGTACCAAGTTTGGAGCATTGCTCGTGTAAGTAATGAAGTTCTTTTAAGAAGTTTTTTTTATGTCATATTAGGATCTTGATTGTGTTCGAACTCCATTTTTTTATCAGAATATTTGCAAAATCTATATTTGTTTGTTTAAAATAGTCAAATGATAATTGGTATTTAGGTTTATAAATGTGTAGTATCGACATTCCATTTGTTTTTTATATGTATAGTATTTTTCAGTTGCATTTAATGTGTGTCTCCTGAATTTATGATGCAGGTGGGTTA	Y	Y	Y	Y	N	N	Y	Y	Y	Y	GTCTCCTGAATTTATGATGCAGGT	8843670	24	N	N	Y	0.429	0.429	1	0.143	0	0.857	0.571	0.571	TS
AT3G24360	3	8843701	8843789	+	MM123	1	9005546	9005634	89	GGATATTCCCGTATTTACCATGGTCGGTGAGTGGAAATGCAAAGAAGGAGAATGGAAATTTGAACCTGAGGAAGGCATCTTTGGTCGTT	Y	Y	Y	Y	N	N	Y	Y	Y	Y	AATGCAAAGAAGGAGAATGGA	8843736	21	N	N	Y	0.571	0.714	0.571	0	1	0.143	0.714	0.286	TS
AT3G24360	3	8843701	8843789	+	MM123	1	9005546	9005634	89	GGATATTCCCGTATTTACCATGGTCGGTGAGTGGAAATGCAAAGAAGGAGAATGGAAATTTGAACCTGAGGAAGGCATCTTTGGTCGTT	Y	Y	Y	Y	N	N	Y	Y	Y	Y	ATGCAAAGAAGGAGAATGGAA	8843737	21	N	N	Y	0.571	0.571	0.571	0	1	0.143	0.857	0.286	TS
AT3G24360	3	8843701	8843789	+	MM123	1	9005546	9005634	89	GGATATTCCCGTATTTACCATGGTCGGTGAGTGGAAATGCAAAGAAGGAGAATGGAAATTTGAACCTGAGGAAGGCATCTTTGGTCGTT	Y	Y	Y	Y	N	N	Y	Y	Y	Y	AAATGCAAAGAAGGAGAATGGA	8843735	22	N	N	Y	0.429	0.571	0.714	0.143	1	0	0.857	0.286	TS
AT3G24360	3	8843701	8843789	+	MM123	1	9005546	9005634	89	GGATATTCCCGTATTTACCATGGTCGGTGAGTGGAAATGCAAAGAAGGAGAATGGAAATTTGAACCTGAGGAAGGCATCTTTGGTCGTT	Y	Y	Y	Y	N	N	Y	Y	Y	Y	AATGCAAAGAAGGAGAATGGAA	8843736	22	N	N	Y	0.429	0.571	0.714	0.143	1	0	0.857	0.286	TS
AT3G24360	3	8843701	8843789	+	MM123	1	9005546	9005634	89	GGATATTCCCGTATTTACCATGGTCGGTGAGTGGAAATGCAAAGAAGGAGAATGGAAATTTGAACCTGAGGAAGGCATCTTTGGTCGTT	Y	Y	Y	Y	N	N	Y	Y	Y	Y	AAATGCAAAGAAGGAGAATGGAA	8843735	23	N	N	Y	0.286	0.429	0.714	0	1	0.143	0.857	0.571	TS
AT3G24360	3	8843701	8843789	+	MM123	1	9005546	9005634	89	GGATATTCCCGTATTTACCATGGTCGGTGAGTGGAAATGCAAAGAAGGAGAATGGAAATTTGAACCTGAGGAAGGCATCTTTGGTCGTT	Y	Y	Y	Y	N	N	Y	Y	Y	Y	AAATTTGAACCTGAGGAAGGCAT	8843756	23	N	N	Y	0.143	0.571	0.429	0	0.857	0.857	0.857	0.286	TS
AT3G24360	3	8843701	8843789	+	MM123	1	9005546	9005634	89	GGATATTCCCGTATTTACCATGGTCGGTGAGTGGAAATGCAAAGAAGGAGAATGGAAATTTGAACCTGAGGAAGGCATCTTTGGTCGTT	Y	Y	Y	Y	N	N	Y	Y	Y	Y	AATTTGAACCTGAGGAAGGCATC	8843757	23	N	N	Y	0.143	0.571	0.429	0	0.714	0.857	1	0.286	TS
AT3G24360	3	8843701	8843789	+	MM123	1	9005546	9005634	89	GGATATTCCCGTATTTACCATGGTCGGTGAGTGGAAATGCAAAGAAGGAGAATGGAAATTTGAACCTGAGGAAGGCATCTTTGGTCGTT	Y	Y	Y	Y	N	N	Y	Y	Y	Y	GATATTCCCGTATTTACCATGGTC	8843702	24	N	N	Y	0.429	0.429	0.857	0	0.143	0.857	0.429	0.857	TS
AT3G24360	3	8843701	8843789	+	MM123	1	9005546	9005634	89	GGATATTCCCGTATTTACCATGGTCGGTGAGTGGAAATGCAAAGAAGGAGAATGGAAATTTGAACCTGAGGAAGGCATCTTTGGTCGTT	Y	Y	Y	Y	N	N	Y	Y	Y	Y	ATTCCCGTATTTACCATGGTCGGT	8843705	24	N	N	Y	0.143	0.714	0.857	0	0.714	0.714	0.571	0.286	TS
AT3G24360	3	8843701	8843789	+	MM123	1	9005546	9005634	89	GGATATTCCCGTATTTACCATGGTCGGTGAGTGGAAATGCAAAGAAGGAGAATGGAAATTTGAACCTGAGGAAGGCATCTTTGGTCGTT	Y	Y	Y	Y	N	N	Y	Y	Y	Y	GTATTTACCATGGTCGGTGAGTGG	8843711	24	N	N	Y	0.714	0.571	1	0.143	0	0.714	0.286	0.571	TS
AT3G24360	3	8843701	8843789	+	MM123	1	9005546	9005634	89	GGATATTCCCGTATTTACCATGGTCGGTGAGTGGAAATGCAAAGAAGGAGAATGGAAATTTGAACCTGAGGAAGGCATCTTTGGTCGTT	Y	Y	Y	Y	N	N	Y	Y	Y	Y	TATTTACCATGGTCGGTGAGTGGA	8843712	24	N	N	Y	0.857	0.571	1	0.143	0	0.714	0.286	0.429	TS
AT3G24360	3	8843701	8843789	+	MM123	1	9005546	9005634	89	GGATATTCCCGTATTTACCATGGTCGGTGAGTGGAAATGCAAAGAAGGAGAATGGAAATTTGAACCTGAGGAAGGCATCTTTGGTCGTT	Y	Y	Y	Y	N	N	Y	Y	Y	Y	ATTTACCATGGTCGGTGAGTGGAA	8843713	24	N	N	Y	0.286	0.857	1	0	0.714	0.571	0.429	0.143	TS
AT3G24360	3	8843701	8843789	+	MM123	1	9005546	9005634	89	GGATATTCCCGTATTTACCATGGTCGGTGAGTGGAAATGCAAAGAAGGAGAATGGAAATTTGAACCTGAGGAAGGCATCTTTGGTCGTT	Y	Y	Y	Y	N	N	Y	Y	Y	Y	TACCATGGTCGGTGAGTGGAAATG	8843716	24	N	N	Y	0.857	0.429	1	0.143	0	0.714	0.429	0.429	TS
AT3G24360	3	8843701	8843789	+	MM123	1	9005546	9005634	89	GGATATTCCCGTATTTACCATGGTCGGTGAGTGGAAATGCAAAGAAGGAGAATGGAAATTTGAACCTGAGGAAGGCATCTTTGGTCGTT	Y	Y	Y	Y	N	N	Y	Y	Y	Y	ATGGTCGGTGAGTGGAAATGCAAA	8843720	24	N	N	Y	0.286	0.571	1	0	0.857	0.429	0.714	0.143	TS
AT3G24360	3	8843701	8843789	+	MM123	1	9005546	9005634	89	GGATATTCCCGTATTTACCATGGTCGGTGAGTGGAAATGCAAAGAAGGAGAATGGAAATTTGAACCTGAGGAAGGCATCTTTGGTCGTT	Y	Y	Y	Y	N	N	Y	Y	Y	Y	AATGCAAAGAAGGAGAATGGAAAT	8843736	24	N	N	Y	0.286	0.571	0.857	0	0.714	0.286	1	0.286	TS
AT3G24360	3	8843701	8843789	+	MM123	1	9005546	9005634	89	GGATATTCCCGTATTTACCATGGTCGGTGAGTGGAAATGCAAAGAAGGAGAATGGAAATTTGAACCTGAGGAAGGCATCTTTGGTCGTT	Y	Y	Y	Y	N	N	Y	Y	Y	Y	AGAATGGAAATTTGAACCTGAGGA	8843749	24	N	N	Y	0.143	0.571	0.714	0	0.857	0.429	1	0.286	TS
AT3G24360	3	8843701	8843789	+	MM123	1	9005546	9005634	89	GGATATTCCCGTATTTACCATGGTCGGTGAGTGGAAATGCAAAGAAGGAGAATGGAAATTTGAACCTGAGGAAGGCATCTTTGGTCGTT	Y	Y	Y	Y	N	N	Y	Y	Y	Y	ATGGAAATTTGAACCTGAGGAAGG	8843752	24	N	N	Y	0.143	0.429	1	0	0.571	0.714	0.857	0.286	TS
AT3G24360	3	8843701	8843789	+	MM123	1	9005546	9005634	89	GGATATTCCCGTATTTACCATGGTCGGTGAGTGGAAATGCAAAGAAGGAGAATGGAAATTTGAACCTGAGGAAGGCATCTTTGGTCGTT	Y	Y	Y	Y	N	N	Y	Y	Y	Y	GGAAATTTGAACCTGAGGAAGGCA	8843754	24	N	N	Y	0.429	0.143	0.857	0	0.286	0.857	0.857	0.571	TS
AT3G24360	3	8843701	8843789	+	MM123	1	9005546	9005634	89	GGATATTCCCGTATTTACCATGGTCGGTGAGTGGAAATGCAAAGAAGGAGAATGGAAATTTGAACCTGAGGAAGGCATCTTTGGTCGTT	Y	Y	Y	Y	N	N	Y	Y	Y	Y	GAAATTTGAACCTGAGGAAGGCAT	8843755	24	N	N	Y	0.429	0.143	1	0	0.429	0.714	0.857	0.429	TS
AT3G24360	3	8843701	8843789	+	MM123	1	9005546	9005634	89	GGATATTCCCGTATTTACCATGGTCGGTGAGTGGAAATGCAAAGAAGGAGAATGGAAATTTGAACCTGAGGAAGGCATCTTTGGTCGTT	Y	Y	Y	Y	N	N	Y	Y	Y	Y	AAATTTGAACCTGAGGAAGGCATC	8843756	24	N	N	Y	0.143	0.429	0.714	0	0.857	0.571	1	0.286	TS
AT3G24360	3	8843701	8843789	+	MM123	1	9005546	9005634	89	GGATATTCCCGTATTTACCATGGTCGGTGAGTGGAAATGCAAAGAAGGAGAATGGAAATTTGAACCTGAGGAAGGCATCTTTGGTCGTT	Y	Y	Y	Y	N	N	Y	Y	Y	Y	AATTTGAACCTGAGGAAGGCATCT	8843757	24	N	N	Y	0.143	0.429	0.857	0	0.714	0.571	1	0.286	TS
AT3G24360	3	8843701	8843789	+	MM123	1	9005546	9005634	89	GGATATTCCCGTATTTACCATGGTCGGTGAGTGGAAATGCAAAGAAGGAGAATGGAAATTTGAACCTGAGGAAGGCATCTTTGGTCGTT	Y	Y	Y	Y	N	N	Y	Y	Y	Y	ATTTGAACCTGAGGAAGGCATCTT	8843758	24	N	N	Y	0.143	0.571	0.714	0	0.857	0.429	1	0.286	TS
AT3G24360	3	8843701	8844099	+	MM123	1	12714189	12714587	399	GGATATTCCCGTATTTACCATGGTCGGTGAGTGGAAATGCAAAGAAGGAGAATGGAAATTTGAACCTGAGGAAGGCATCTTTGGTCGTTGTGTACGCGTTCAGGAAACCATGACGTACACGGACTTTGTCCGTACACTCCGAGAGGCTTTCAGTTTGAAGTCCACCGAGATCAATCCCATAATTAGCTACTGGATGCCGGGTGAAATGTCAGTGCTGATAGATACTAAACGCCCTCCTGTATACATTGACAGTCAGATGGGTCTCGAGACGTTTTTTTTGGTTCGTGGTGGGTATCTTTCTCTCAACTTGTTCGTCTCTTTCAATAATACAGTGAAGGCGTTCGGGAATACTGTCTCTAGGTCTCATGGTGAAGTTTCTGAAAGTGACCGTGTGTTTGA	Y	Y	Y	N	N	N	Y	Y	Y	Y	AAACCATGACGTACACGGACT	8843805	21	N	N	Y	0.429	0.857	0.286	0.143	1	0.429	0.714	0.143	TS
AT3G24360	3	8843701	8844099	+	MM123	1	12714189	12714587	399	GGATATTCCCGTATTTACCATGGTCGGTGAGTGGAAATGCAAAGAAGGAGAATGGAAATTTGAACCTGAGGAAGGCATCTTTGGTCGTTGTGTACGCGTTCAGGAAACCATGACGTACACGGACTTTGTCCGTACACTCCGAGAGGCTTTCAGTTTGAAGTCCACCGAGATCAATCCCATAATTAGCTACTGGATGCCGGGTGAAATGTCAGTGCTGATAGATACTAAACGCCCTCCTGTATACATTGACAGTCAGATGGGTCTCGAGACGTTTTTTTTGGTTCGTGGTGGGTATCTTTCTCTCAACTTGTTCGTCTCTTTCAATAATACAGTGAAGGCGTTCGGGAATACTGTCTCTAGGTCTCATGGTGAAGTTTCTGAAAGTGACCGTGTGTTTGA	Y	Y	Y	N	N	N	Y	Y	Y	Y	AATAATACAGTGAAGGCGTTC	8844023	21	N	N	Y	0.571	0.714	0.714	0.286	0.857	0	0.571	0.286	TS
AT3G24360	3	8843701	8844099	+	MM123	1	12714189	12714587	399	GGATATTCCCGTATTTACCATGGTCGGTGAGTGGAAATGCAAAGAAGGAGAATGGAAATTTGAACCTGAGGAAGGCATCTTTGGTCGTTGTGTACGCGTTCAGGAAACCATGACGTACACGGACTTTGTCCGTACACTCCGAGAGGCTTTCAGTTTGAAGTCCACCGAGATCAATCCCATAATTAGCTACTGGATGCCGGGTGAAATGTCAGTGCTGATAGATACTAAACGCCCTCCTGTATACATTGACAGTCAGATGGGTCTCGAGACGTTTTTTTTGGTTCGTGGTGGGTATCTTTCTCTCAACTTGTTCGTCTCTTTCAATAATACAGTGAAGGCGTTCGGGAATACTGTCTCTAGGTCTCATGGTGAAGTTTCTGAAAGTGACCGTGTGTTTGA	Y	Y	Y	N	N	N	Y	Y	Y	Y	AGGAAACCATGACGTACACGGA	8843802	22	N	N	Y	0.286	0.571	0.714	0	1	0.143	0.857	0.429	TS
AT3G24360	3	8843701	8844099	+	MM123	1	12714189	12714587	399	GGATATTCCCGTATTTACCATGGTCGGTGAGTGGAAATGCAAAGAAGGAGAATGGAAATTTGAACCTGAGGAAGGCATCTTTGGTCGTTGTGTACGCGTTCAGGAAACCATGACGTACACGGACTTTGTCCGTACACTCCGAGAGGCTTTCAGTTTGAAGTCCACCGAGATCAATCCCATAATTAGCTACTGGATGCCGGGTGAAATGTCAGTGCTGATAGATACTAAACGCCCTCCTGTATACATTGACAGTCAGATGGGTCTCGAGACGTTTTTTTTGGTTCGTGGTGGGTATCTTTCTCTCAACTTGTTCGTCTCTTTCAATAATACAGTGAAGGCGTTCGGGAATACTGTCTCTAGGTCTCATGGTGAAGTTTCTGAAAGTGACCGTGTGTTTGA	Y	Y	Y	N	N	N	Y	Y	Y	Y	AAACCATGACGTACACGGACTT	8843805	22	N	N	Y	0.286	0.857	0.429	0.143	1	0.429	0.714	0.143	TS
AT3G24360	3	8843701	8844099	+	MM123	1	12714189	12714587	399	GGATATTCCCGTATTTACCATGGTCGGTGAGTGGAAATGCAAAGAAGGAGAATGGAAATTTGAACCTGAGGAAGGCATCTTTGGTCGTTGTGTACGCGTTCAGGAAACCATGACGTACACGGACTTTGTCCGTACACTCCGAGAGGCTTTCAGTTTGAAGTCCACCGAGATCAATCCCATAATTAGCTACTGGATGCCGGGTGAAATGTCAGTGCTGATAGATACTAAACGCCCTCCTGTATACATTGACAGTCAGATGGGTCTCGAGACGTTTTTTTTGGTTCGTGGTGGGTATCTTTCTCTCAACTTGTTCGTCTCTTTCAATAATACAGTGAAGGCGTTCGGGAATACTGTCTCTAGGTCTCATGGTGAAGTTTCTGAAAGTGACCGTGTGTTTGA	Y	Y	Y	N	N	N	Y	Y	Y	Y	AAGTCCACCGAGATCAATCCCA	8843858	22	N	N	Y	0	0.714	1	0.429	0.571	0.429	0.286	0.571	TS
AT3G24360	3	8843701	8844099	+	MM123	1	12714189	12714587	399	GGATATTCCCGTATTTACCATGGTCGGTGAGTGGAAATGCAAAGAAGGAGAATGGAAATTTGAACCTGAGGAAGGCATCTTTGGTCGTTGTGTACGCGTTCAGGAAACCATGACGTACACGGACTTTGTCCGTACACTCCGAGAGGCTTTCAGTTTGAAGTCCACCGAGATCAATCCCATAATTAGCTACTGGATGCCGGGTGAAATGTCAGTGCTGATAGATACTAAACGCCCTCCTGTATACATTGACAGTCAGATGGGTCTCGAGACGTTTTTTTTGGTTCGTGGTGGGTATCTTTCTCTCAACTTGTTCGTCTCTTTCAATAATACAGTGAAGGCGTTCGGGAATACTGTCTCTAGGTCTCATGGTGAAGTTTCTGAAAGTGACCGTGTGTTTGA	Y	Y	Y	N	N	N	Y	Y	Y	Y	ATACTAAACGCCCTCCTGTATA	8843922	22	N	N	Y	0.429	0.714	0.143	0.429	1	0.429	0	0.857	TS
AT3G24360	3	8843701	8844099	+	MM123	1	12714189	12714587	399	GGATATTCCCGTATTTACCATGGTCGGTGAGTGGAAATGCAAAGAAGGAGAATGGAAATTTGAACCTGAGGAAGGCATCTTTGGTCGTTGTGTACGCGTTCAGGAAACCATGACGTACACGGACTTTGTCCGTACACTCCGAGAGGCTTTCAGTTTGAAGTCCACCGAGATCAATCCCATAATTAGCTACTGGATGCCGGGTGAAATGTCAGTGCTGATAGATACTAAACGCCCTCCTGTATACATTGACAGTCAGATGGGTCTCGAGACGTTTTTTTTGGTTCGTGGTGGGTATCTTTCTCTCAACTTGTTCGTCTCTTTCAATAATACAGTGAAGGCGTTCGGGAATACTGTCTCTAGGTCTCATGGTGAAGTTTCTGAAAGTGACCGTGTGTTTGA	Y	Y	Y	N	N	N	Y	Y	Y	Y	AGGAAACCATGACGTACACGGAC	8843802	23	N	N	Y	0.286	0.429	0.714	0	1	0.286	0.857	0.429	TS
AT3G24360	3	8843701	8844099	+	MM123	1	12714189	12714587	399	GGATATTCCCGTATTTACCATGGTCGGTGAGTGGAAATGCAAAGAAGGAGAATGGAAATTTGAACCTGAGGAAGGCATCTTTGGTCGTTGTGTACGCGTTCAGGAAACCATGACGTACACGGACTTTGTCCGTACACTCCGAGAGGCTTTCAGTTTGAAGTCCACCGAGATCAATCCCATAATTAGCTACTGGATGCCGGGTGAAATGTCAGTGCTGATAGATACTAAACGCCCTCCTGTATACATTGACAGTCAGATGGGTCTCGAGACGTTTTTTTTGGTTCGTGGTGGGTATCTTTCTCTCAACTTGTTCGTCTCTTTCAATAATACAGTGAAGGCGTTCGGGAATACTGTCTCTAGGTCTCATGGTGAAGTTTCTGAAAGTGACCGTGTGTTTGA	Y	Y	Y	N	N	N	Y	Y	Y	Y	AAACCATGACGTACACGGACTTT	8843805	23	N	N	Y	0.286	0.571	0.571	0.143	1	0.571	0.714	0.143	TS
AT3G24360	3	8843701	8844099	+	MM123	1	12714189	12714587	399	GGATATTCCCGTATTTACCATGGTCGGTGAGTGGAAATGCAAAGAAGGAGAATGGAAATTTGAACCTGAGGAAGGCATCTTTGGTCGTTGTGTACGCGTTCAGGAAACCATGACGTACACGGACTTTGTCCGTACACTCCGAGAGGCTTTCAGTTTGAAGTCCACCGAGATCAATCCCATAATTAGCTACTGGATGCCGGGTGAAATGTCAGTGCTGATAGATACTAAACGCCCTCCTGTATACATTGACAGTCAGATGGGTCTCGAGACGTTTTTTTTGGTTCGTGGTGGGTATCTTTCTCTCAACTTGTTCGTCTCTTTCAATAATACAGTGAAGGCGTTCGGGAATACTGTCTCTAGGTCTCATGGTGAAGTTTCTGAAAGTGACCGTGTGTTTGA	Y	Y	Y	N	N	N	Y	Y	Y	Y	AACCATGACGTACACGGACTTTG	8843806	23	N	N	Y	0.286	0.571	0.571	0.143	1	0.571	0.714	0.143	TS
AT3G24360	3	8843701	8844099	+	MM123	1	12714189	12714587	399	GGATATTCCCGTATTTACCATGGTCGGTGAGTGGAAATGCAAAGAAGGAGAATGGAAATTTGAACCTGAGGAAGGCATCTTTGGTCGTTGTGTACGCGTTCAGGAAACCATGACGTACACGGACTTTGTCCGTACACTCCGAGAGGCTTTCAGTTTGAAGTCCACCGAGATCAATCCCATAATTAGCTACTGGATGCCGGGTGAAATGTCAGTGCTGATAGATACTAAACGCCCTCCTGTATACATTGACAGTCAGATGGGTCTCGAGACGTTTTTTTTGGTTCGTGGTGGGTATCTTTCTCTCAACTTGTTCGTCTCTTTCAATAATACAGTGAAGGCGTTCGGGAATACTGTCTCTAGGTCTCATGGTGAAGTTTCTGAAAGTGACCGTGTGTTTGA	Y	Y	Y	N	N	N	Y	Y	Y	Y	ACCATGACGTACACGGACTTTGT	8843807	23	N	N	Y	0.286	0.571	0.571	0.286	0.857	0.429	0.857	0.143	TS
AT3G24360	3	8843701	8844099	+	MM123	1	12714189	12714587	399	GGATATTCCCGTATTTACCATGGTCGGTGAGTGGAAATGCAAAGAAGGAGAATGGAAATTTGAACCTGAGGAAGGCATCTTTGGTCGTTGTGTACGCGTTCAGGAAACCATGACGTACACGGACTTTGTCCGTACACTCCGAGAGGCTTTCAGTTTGAAGTCCACCGAGATCAATCCCATAATTAGCTACTGGATGCCGGGTGAAATGTCAGTGCTGATAGATACTAAACGCCCTCCTGTATACATTGACAGTCAGATGGGTCTCGAGACGTTTTTTTTGGTTCGTGGTGGGTATCTTTCTCTCAACTTGTTCGTCTCTTTCAATAATACAGTGAAGGCGTTCGGGAATACTGTCTCTAGGTCTCATGGTGAAGTTTCTGAAAGTGACCGTGTGTTTGA	Y	Y	Y	N	N	N	Y	Y	Y	Y	ACGTACACGGACTTTGTCCGTAC	8843813	23	N	N	Y	0.143	0.571	0.571	0.143	1	0.714	0.429	0.429	TS
AT3G24360	3	8843701	8844099	+	MM123	1	12714189	12714587	399	GGATATTCCCGTATTTACCATGGTCGGTGAGTGGAAATGCAAAGAAGGAGAATGGAAATTTGAACCTGAGGAAGGCATCTTTGGTCGTTGTGTACGCGTTCAGGAAACCATGACGTACACGGACTTTGTCCGTACACTCCGAGAGGCTTTCAGTTTGAAGTCCACCGAGATCAATCCCATAATTAGCTACTGGATGCCGGGTGAAATGTCAGTGCTGATAGATACTAAACGCCCTCCTGTATACATTGACAGTCAGATGGGTCTCGAGACGTTTTTTTTGGTTCGTGGTGGGTATCTTTCTCTCAACTTGTTCGTCTCTTTCAATAATACAGTGAAGGCGTTCGGGAATACTGTCTCTAGGTCTCATGGTGAAGTTTCTGAAAGTGACCGTGTGTTTGA	Y	Y	Y	N	N	N	Y	Y	Y	Y	ACACGGACTTTGTCCGTACACTC	8843817	23	N	N	Y	0.143	0.714	0.571	0.143	0.857	0.857	0.429	0.286	TS
AT3G24360	3	8843701	8844099	+	MM123	1	12714189	12714587	399	GGATATTCCCGTATTTACCATGGTCGGTGAGTGGAAATGCAAAGAAGGAGAATGGAAATTTGAACCTGAGGAAGGCATCTTTGGTCGTTGTGTACGCGTTCAGGAAACCATGACGTACACGGACTTTGTCCGTACACTCCGAGAGGCTTTCAGTTTGAAGTCCACCGAGATCAATCCCATAATTAGCTACTGGATGCCGGGTGAAATGTCAGTGCTGATAGATACTAAACGCCCTCCTGTATACATTGACAGTCAGATGGGTCTCGAGACGTTTTTTTTGGTTCGTGGTGGGTATCTTTCTCTCAACTTGTTCGTCTCTTTCAATAATACAGTGAAGGCGTTCGGGAATACTGTCTCTAGGTCTCATGGTGAAGTTTCTGAAAGTGACCGTGTGTTTGA	Y	Y	Y	N	N	N	Y	Y	Y	Y	ACTTTGTCCGTACACTCCGAGAG	8843823	23	N	N	Y	0.143	0.571	0.857	0.429	0.286	0.857	0.143	0.714	TS
AT3G24360	3	8843701	8844099	+	MM123	1	12714189	12714587	399	GGATATTCCCGTATTTACCATGGTCGGTGAGTGGAAATGCAAAGAAGGAGAATGGAAATTTGAACCTGAGGAAGGCATCTTTGGTCGTTGTGTACGCGTTCAGGAAACCATGACGTACACGGACTTTGTCCGTACACTCCGAGAGGCTTTCAGTTTGAAGTCCACCGAGATCAATCCCATAATTAGCTACTGGATGCCGGGTGAAATGTCAGTGCTGATAGATACTAAACGCCCTCCTGTATACATTGACAGTCAGATGGGTCTCGAGACGTTTTTTTTGGTTCGTGGTGGGTATCTTTCTCTCAACTTGTTCGTCTCTTTCAATAATACAGTGAAGGCGTTCGGGAATACTGTCTCTAGGTCTCATGGTGAAGTTTCTGAAAGTGACCGTGTGTTTGA	Y	Y	Y	N	N	N	Y	Y	Y	Y	AAGTCCACCGAGATCAATCCCAT	8843858	23	N	N	Y	0	0.429	0.714	0.429	1	0.714	0.286	0.429	TS
AT3G24360	3	8843701	8844099	+	MM123	1	12714189	12714587	399	GGATATTCCCGTATTTACCATGGTCGGTGAGTGGAAATGCAAAGAAGGAGAATGGAAATTTGAACCTGAGGAAGGCATCTTTGGTCGTTGTGTACGCGTTCAGGAAACCATGACGTACACGGACTTTGTCCGTACACTCCGAGAGGCTTTCAGTTTGAAGTCCACCGAGATCAATCCCATAATTAGCTACTGGATGCCGGGTGAAATGTCAGTGCTGATAGATACTAAACGCCCTCCTGTATACATTGACAGTCAGATGGGTCTCGAGACGTTTTTTTTGGTTCGTGGTGGGTATCTTTCTCTCAACTTGTTCGTCTCTTTCAATAATACAGTGAAGGCGTTCGGGAATACTGTCTCTAGGTCTCATGGTGAAGTTTCTGAAAGTGACCGTGTGTTTGA	Y	Y	Y	N	N	N	Y	Y	Y	Y	AGATCAATCCCATAATTAGCTAC	8843868	23	N	N	Y	0	0.429	0.429	0.429	1	0.429	0.429	0.857	TS
[truncated: 290 more rows]

## Sheet: Supplemental Table 10
Supplemental table 10. Primers used for Q-PCR
[truncated: 63 more rows]
